# Supplementary material
Source: PubMed Central journal article supplement (PMC7723234)

## Supporting Information

### Drug Design Targeting TCF-Driven Epithelial-Mesenchymal Transition as a Therapeutic Strategy for Colorectal Cancer

Adedoyin D. Abraham,<sup>†</sup> Hector Esquer,<sup>†</sup> Qiong Zhou,<sup>†</sup> Nicholas Tomlinson,<sup>†</sup> Brayden D. Hamill,<sup>†</sup> Joshua M. Abbott,<sup>†</sup> Linfeng Li, Laura A. Pike, Sébastien Rinaldetti,<sup>†</sup> Dominique A. Ramirez,<sup>‡</sup> Paul J. Lunghofer,<sup>‡</sup> Jose D. Gomez,<sup>†</sup> Jerome Schaack,<sup>#</sup> Travis Nemkov,<sup>‡</sup> Angelo D'Alessandro,<sup>‡</sup> Kirk C. Hansen,<sup>‡,°</sup> Daniel L. Gustafson,<sup>‡,°</sup> Wells A. Messersmith,<sup>§,°</sup> and Daniel V. LaBarbera<sup>†,°,\*</sup>

<sup>†</sup>The Skaggs School of Pharmacy and Pharmaceutical Sciences, Department of Pharmaceutical Sciences; The School of Medicine, Department of <sup>‡</sup>Biochemistry and Molecular Genetics; <sup>#</sup>Department of Immunology and Microbiology, <sup>§</sup>Division of Medical Oncology; and The <sup>°</sup>University of Colorado Cancer Center; The University of Colorado Anschutz Medical Campus, Aurora CO, 80045, U.S.A.

<sup>‡</sup>Clinical Sciences, School of Biomedical Engineering, Colorado State University, Fort Collins CO, 80523, U.S.A.

**Corresponding Author** \*D.V.L.: e-mail, [daniel.labarbera@ucdenver.edu](mailto:daniel.labarbera@ucdenver.edu)

#### Table of Contents

|                                                                                               |             |
|-----------------------------------------------------------------------------------------------|-------------|
| Figure S1. Binding site identification with neo on TOP2A .....                                | S2          |
| Table S1. Molecular docking summary of analogs .....                                          | S3 – S4     |
| Figure S2. Aqueous solubility studies with morpholine compounds and their parent analogs..... | S5          |
| Table S2. HPLC purity analysis of final analogs .....                                         | S6          |
| Table S3. Mouse microsomal stability studies with selected analogs .....                      | S7          |
| Chemical Syntheses .....                                                                      | S8          |
| Scheme S1. Synthesis of key halogenated quinoline intermediate <b>4</b> .....                 | S9          |
| NMR, IR and Mass spectral of analogs.....                                                     | S11 – S223  |
| HPLC trace of final analogs.....                                                              | S224 – S252 |

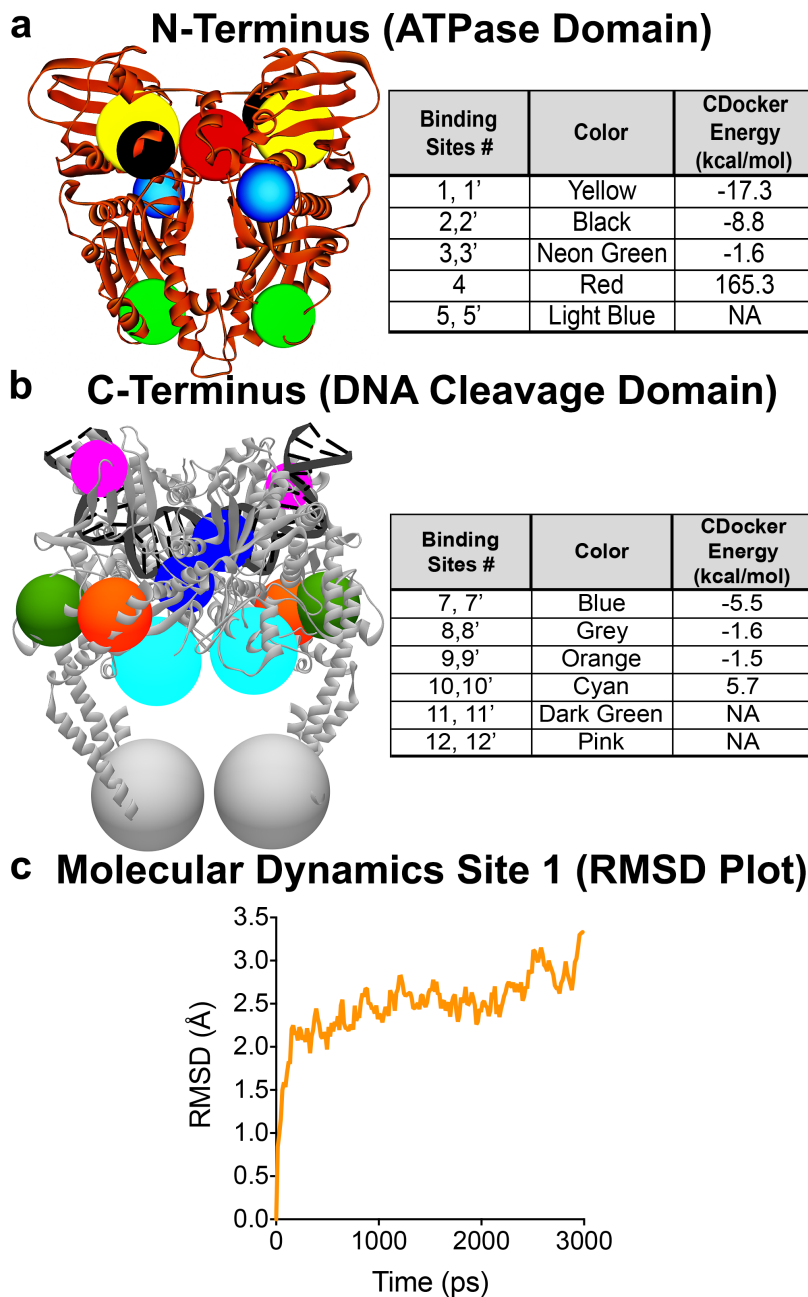

**Figure S1. Binding site identification with neo on TOP2A.** (a) The potential binding sites identified on the N-terminus, the sites in yellow represent the ATPase site. The site in red represents the allosteric site. Other sites in light blue, black and neon green were also identified for neo in each with respective binding energies (kcal/mol) for each binding site identified on the N-terminus. (b) The potential binding sites identified on the C-terminus, with binding energy (kcal/mol) for neo in each binding site identified on C-terminus. (c) The molecular dynamics of neo-TOP2A (ATPase site1). The average RMSD is 2.48Å

**Table S1. The summary of molecular docking interactions of designed TOP2A inhibitors.**

| Analog | R1                                                                                  | R2                                                                                  | R3               | R4               | Analog-TOP2A Interactions                    |                                                                                               |                                   |
|--------|-------------------------------------------------------------------------------------|-------------------------------------------------------------------------------------|------------------|------------------|----------------------------------------------|-----------------------------------------------------------------------------------------------|-----------------------------------|
|        |                                                                                     |                                                                                     |                  |                  | Hydrogen Bonding Interactions                | Hydrophobic Interactions                                                                      | Interaction with Mg <sup>2+</sup> |
| 3      |    |    | OCH <sub>3</sub> | OH               | Asn91, Arg98, Asn150                         | $\pi$ - Lonepair with Ser149<br>$\pi$ - Alkyl with Arg98, Ala167<br>$\pi$ - donor with Asn150 | $\pi$ - Cation                    |
| 6      |    |    | H                | OCH <sub>3</sub> | Asn91                                        | $\pi$ - Alkyl with Ile125<br>Fluorine with, Asn95                                             | Metal-Acceptor                    |
| 7      |    |    | H                | OH               | Asn91, Asn150, Ser148, Arg98, Ala 167        | $\pi$ - Anion with Asp94                                                                      | $\pi$ - Cation, Metal-Acceptor    |
| 28     |    |    | H                | OH               | Asn91, Asn150, Ala167, Ser148                | $\pi$ - Anion with Asp94                                                                      | $\pi$ - Cation<br>Metal-Acceptor  |
| 29     |    |    | H                | OH               | Asn91, Asn150, Ser149                        | Fluorine with Asn91,<br>Fluorine with Asn120                                                  | Metal-Acceptor                    |
| 30     |  |  | H                | OH               | Asn91, Asn149, Ala167, Ser149, Thr215        | $\pi$ - Anion with Asp94<br>Fluorine with Asn120                                              | $\pi$ - Cation, Metal-Acceptor    |
| 31     |  |  | H                | OH               | Asn91, Asn150, Ala167, Ser148                | $\pi$ - Anion with Asp94<br>$\pi$ - Alkyl with Phe142, Ile217<br>Fluorine with, Asn91         | $\pi$ - Cation, Metal-Acceptor    |
| 32     |  |  | H                | OH               | Arg98, Gly166, Lys168                        | $\pi$ - $\pi$ with Phe142<br>$\pi$ - Alkyl with Ile141, Ala167<br>Fluorine with Asn95         | $\pi$ - Cation<br>Metal-Acceptor  |
| 34     |  |  | H                | OH               | Asn91, Asn150, Ala167, Ser148, Thr215        | $\pi$ - Anion with Asp94                                                                      | $\pi$ - Cation, Metal-Acceptor    |
| 35     |  |  | H                | OH               | Asn91, Asn150, Ser148, Asn120, Ala167        | None                                                                                          | $\pi$ - Cation, Metal-Acceptor    |
| 36     |  |  | H                | OH               | Asn91, Asn95, Asn120, Asn150, Ala167, Ser148 | $\pi$ - Anion with Asp94                                                                      | $\pi$ - Cation, Metal-Acceptor    |
| 38     |  |  | H                | OH               | Asn91, Arg98, Ser148, Ser149                 | $\pi$ - Alkyl with Ala92, Ile125                                                              | Metal-Acceptor                    |

Table S1 Continued.

| Analog | R1                                                                                  | R2                                                                                  | R3 | R4 | Analog-TOP2A Interactions      |                                                                     |                                   |
|--------|-------------------------------------------------------------------------------------|-------------------------------------------------------------------------------------|----|----|--------------------------------|---------------------------------------------------------------------|-----------------------------------|
|        |                                                                                     |                                                                                     |    |    | Hydrogen Bonding Interactions  | Hydrophobic Interactions                                            | Interaction with Mg <sup>2+</sup> |
| 39     |    |    | H  | OH | Asn91, Ser149                  | $\pi$ - Alkyl with Ile125, Ile141<br>$\pi$ - Amide with Asn91       | Metal-Acceptor                    |
| 40     |    |    | H  | OH | Ser148, Ser149, Asn120, Lys168 | $\pi$ - Alkyl with Ile125, Ile167<br>$\pi$ - Amide with Asn91       | Metal-Acceptor                    |
| 41     |    |    | H  | OH | Ser148, Ser149, Lys168         | $\pi$ - Alkyl with Ile125, Ile141,<br>Fluorine bonding with Asn120, | Metal-Acceptor                    |
| 42     |    |    | H  | OH | Asn91, Ser149, Thr215          | $\pi$ - Alkyl with Ile141<br>Fluorine with Asn95, Lys123            | metal-Acceptor                    |
| 43     |    |    | H  | OH | Asn91, Ser149, Lys168, Gly164  | $\pi$ - Alkyl with Ile125, Ile141<br>$\pi$ - Anion with Asn95       | Metal-Acceptor                    |
| 53     |  |  | H  | OH | Thr147, Ser148                 | $\pi$ - Anion with Asp94<br>$\pi$ - Alkyl with Ile125               | $\pi$ - Cation,<br>Metal-Acceptor |
| 54     |  |  | H  | OH | Asn91, Asn150, Ala167, Ser148  | $\pi$ - Anion with Asp94<br>$\pi$ - Alkyl with Ile125               | $\pi$ - Cation,<br>Metal-Acceptor |
| 56     |  |  | H  | OH | Asn91, Asn150, Ser148, Ala 167 | $\pi$ - Anion with Asp94                                            | $\pi$ - Cation,<br>Metal-Acceptor |
| 58     |  |  | H  | OH | Asn91, Asn150, Ala167, Ser148  | $\pi$ - Anion with Asp94<br>$\pi$ - Sulfur with Phe142              | $\pi$ - Cation,<br>Metal-Acceptor |
| 59     |  |  | H  | OH | Asn91, Ser149                  | None                                                                | Metal-Acceptor                    |
| 60     |  |  | H  | OH | Ser149, Asn150, Thr147         | $\pi$ - Alkyl with Ile125, Ile141                                   | Metal-Acceptor                    |
| 61     |  |  | H  | OH | Thr147, Ser149, Lys168         | $\pi$ - Amide Asn91<br>$\pi$ - Alkyl with Ile141                    | Metal-Acceptor                    |

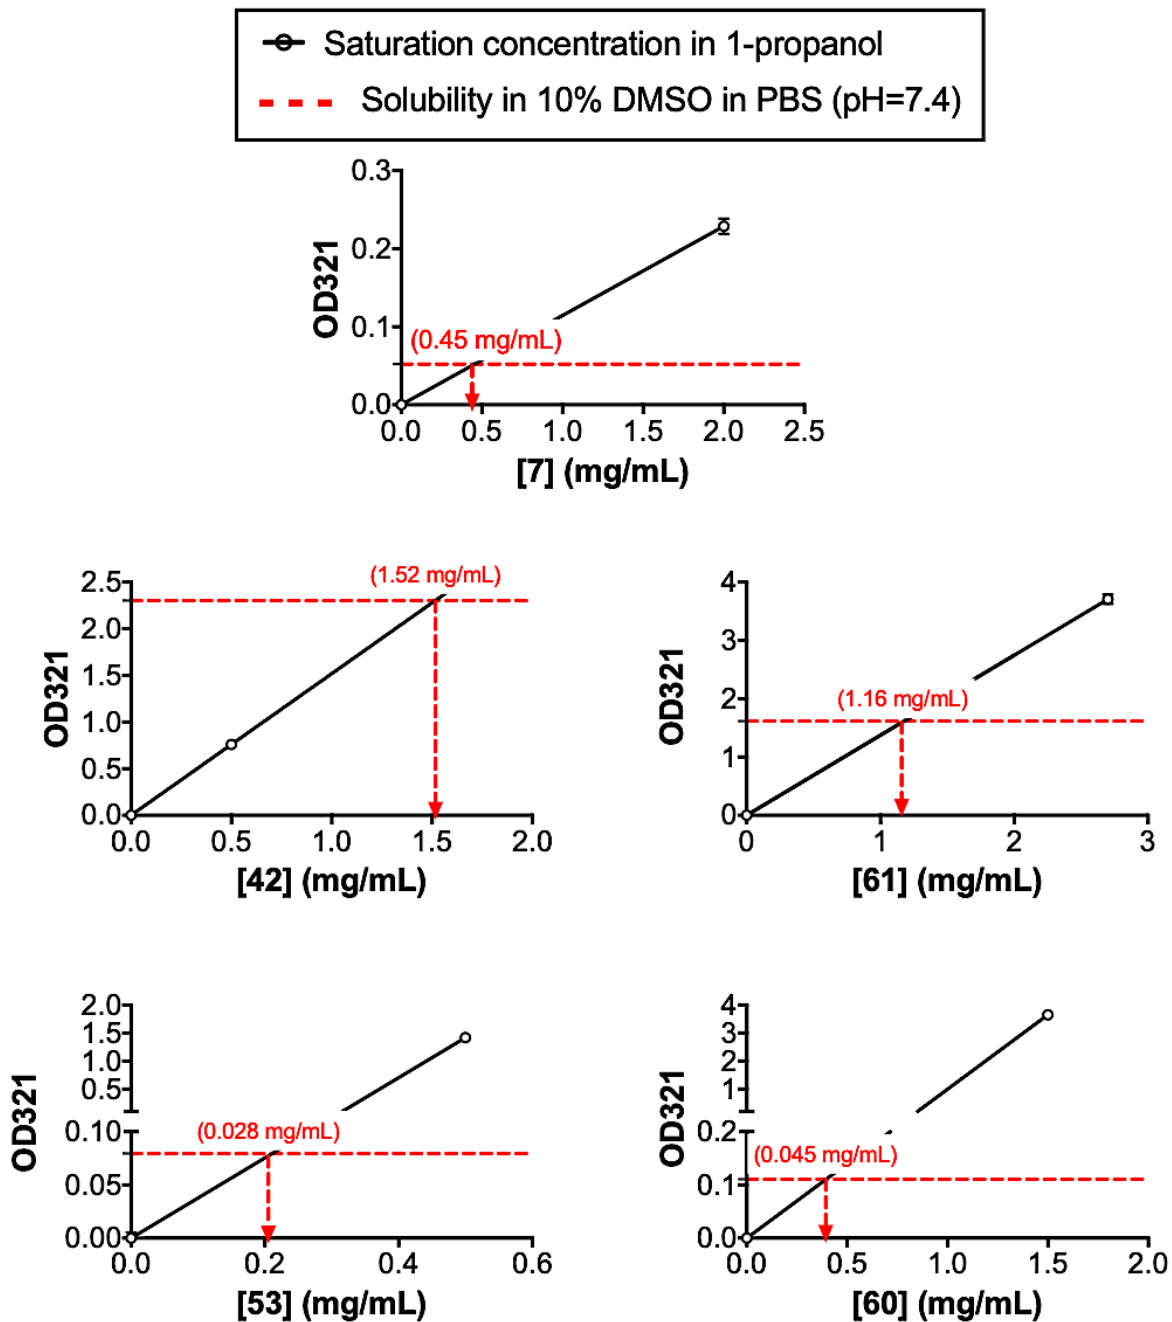

Figure S2. Aqueous solubility studies with morpholine analogs and their respective parent compounds 7 and 53.

**Table S2. HPLC purity analysis of final TOP2A inhibitors.**

| Analogs | Mobile Phase                                 | Retention Time (min) | % Purity | Wave Length (nm) | Analogs | Mobile Phase       | Retention Time (min) | % Purity | Wave Length (nm) |
|---------|----------------------------------------------|----------------------|----------|------------------|---------|--------------------|----------------------|----------|------------------|
| 2       | Water/Acetonitrile                           | 14.7                 | 100      | 254              | 38      | Water/Acetonitrile | 4.45                 | 100      | 254              |
| 3       | Water/Acetonitrile                           | 25.77                | 98.4     | 254              | 39      | Water/Acetonitrile | 22.9                 | 95       | 254              |
| 6       | Water/Acetonitrile                           | 16.85                | 95       | 254              | 40      | Water/Acetonitrile | 29.2                 | 95.2     | 270              |
| 7       | Water/Acetonitrile                           | 4.9                  | 100      | 254              | 41      | Water/Acetonitrile | 24.42                | 95       | 254              |
| 20      | Water/Acetonitrile                           | 5.13                 | 100      | 270              | 42      | Water/Methanol     | 17.27                | 100      | 270              |
| 28      | Water/Acetonitrile                           | 15.81                | 100      | 254              | 43      | Water/Acetonitrile | 16.14                | 100      | 254              |
| 29      | Water/Acetonitrile                           | 16.67                | 100      | 254              | 53      | Water/Methanol     | 17.77                | 100      | 270              |
| 30      | Water/Acetonitrile                           | 16.71                | 100      | 254              | 54      | Water/Acetonitrile | 19.2                 | 100      | 254              |
| 31      | Water/Acetonitrile                           | 30.36                | 95       | 254              | 55      | Water/Acetonitrile | 20.3                 | 100      | 254              |
| 32      | Water/Acetonitrile                           | 19.93                | 100      | 254              | 56      | Water/Acetonitrile | 5.37                 | 100      | 254              |
| 33      | Water/Acetonitrile                           | 24.51                | 96.3     | 254              | 57      | Water/Methanol     | 21.37                | 96       | 254              |
| 34      | Water/Acetonitrile                           | 30.4                 | 100      | 254              | 58      | Water/Acetonitrile | 5.93                 | 100      | 254              |
| 35      | Water/Acetonitrile                           | 4.32                 | 100      | 270              | 59      | Water/acetonitrile | 3.77                 | 100      | 254              |
| 36      | 0.1% TFA-Water/<br>0.1% TFA-<br>Acetonitrile | 3.09                 | 100      | 270              | 60      | Water/Acetonitrile | 19.19                | 100      | 254              |
| 37      | Water/Acetonitrile                           | 31.87                | 95       | 254              | 61      | Water/Acetonitrile | 21.12                | 100      | 270              |

**Table S3. Mouse microsomal stability studies with TOP2A inhibitors.**

| <b>Microsomal Stability Studies</b> |                  |                                             |                                               |
|-------------------------------------|------------------|---------------------------------------------|-----------------------------------------------|
| <b>Compound Number</b>              | <b>Structure</b> | <b>Half-life in Active Microsomes (min)</b> | <b>Half-life in Inactive Microsomes (min)</b> |
| 53                                  |                  | >60                                         | >60                                           |
| 53                                  |                  | >60                                         | >60                                           |
| 53                                  |                  | 30.18                                       | >60                                           |
| 53                                  |                  | 28.79                                       | >60                                           |
| 61                                  |                  | 13.9                                        | >60                                           |
| 42                                  |                  | 8.53                                        | >60                                           |
| 7                                   |                  | 6.72                                        | >60                                           |
| 3                                   |                  | 4.72                                        | >60                                           |
| 28                                  |                  | 4.08                                        | >60                                           |
| 58                                  |                  | 2.66                                        | >60                                           |

## Chemical Syntheses

**Methyl-2-methoxy-3-nitrobenzoate (S1).** To 15 g (81.9 mmol) of 2-hydroxy-3-nitrobenzoic acid in 300 mL of acetone were added 25.8 g (19.4 mL, 204.8 mmol) of dimethyl sulfate and 28.3 g (204.8 mmol), of potassium carbonate and the mixture was stirred for 20 h. The reaction mixture was filtered over a pad of celite, concentrated under a reduced pressure to give an oily residue which was treated with NaHCO<sub>3</sub>, and the resulting mixture was extracted with ethyl acetate 3 x (100 mL). The organic layers were combined and dried over anhydrous sodium sulfate, concentrated in vacuo to give 15 g of crude product (87% yield). TLC (ethyl acetate), R<sub>f</sub> = 0.74.

**2-Methoxy-3-nitrobenzoic acid (S2).** To 8.94 g (213 mmol) of (S1) were added lithium hydroxide monohydrate, 50 mL of (THF/H<sub>2</sub>O/MeOH). The resulting solution was allowed to stir at room temperature overnight. The solvents were removed *in vacuo*, and the orange residue obtained was acidified with drops of HCl to give a white precipitate that was filtered and dried *in vacuo* to afford 13.8 g (99% yield). <sup>1</sup>H NMR (500 MHz, DMSO-d<sub>6</sub>) δ 8.06 (d, *J* = 8.0 Hz, 1H), 8.01 (d, *J* = 8.0 Hz, 1H), 7.40 (t, *J* = 8.0 Hz, 1H), 3.89 (s, 3H).

**2-Methyl-2-propanyl [2-(methoxy)-3-nitrophenyl] carbamate (S3).** To 11.9 g (60.3 mmol) of (S2) dissolved in 190 mL of tert-butyl alcohol was added 12.6 mL (90.4 mmol) of trimethylamine, followed by dropwise addition of 16.8 mL (78.3 mmol) of diphenylphosphoryl azide (DPPA) at room temperature. The reaction mixture was refluxed for 6 h, and cool to room temperature. The solvents were removed *in vacuo* to give a crude product, which was purified by column chromatography using silica gel and chloroform (CHCl<sub>3</sub>) as the solvent to afford the product 13.0 g (80% yield). TLC (40 % ethyl acetate in hexane). R<sub>f</sub> = 0.66; <sup>1</sup>H NMR (400 MHz, CDCl<sub>3</sub>) δ 8.39 (d, *J* = 8.0 Hz, 1H), 7.50 (d, *J* = 8.0 Hz, 1H), 7.17 (t, *J* = 8.4 Hz, 1H), 7.12 (broad s, 1H), 3.92 (s, 3H), 1.54 (s, 9H); <sup>13</sup>C NMR (100 MHz, CDCl<sub>3</sub>) δ 152.5, 143.0, 142.1, 134.4, 124.4, 123.4, 118.4, 81.7, 62.4, 28.4; IR (neat) ν<sub>max</sub> 3430.9, 3389.9, 2978.6, 2936.8, 1727.4, 1592.4, 1527.8, 1509.71458.0, 1415.8; ESI-HRMS [M - H]<sup>-</sup> calculated for C<sub>13</sub>H<sub>15</sub>N<sub>4</sub>O<sub>5</sub> 267.0986, found 267.0998.

**2-Methoxy-3-nitroaniline (S4) from hydrolysis of (S3).** To 11.45 g (42.7 mmol) of S3 in 70 mL of methylene chloride was added 32.66 mL (426.92 mmol) of trifluoroacetic acid at room temperature. The reaction was stirred for 4 h and concentrated *in vacuo* to afford the crude product which was purified using silica gel and chloroform as the eluent to afford yellow solid 5.95 g (83% yield). TLC (chloroform) R<sub>f</sub> = 0.17; Melting Point 66-67 °C; <sup>1</sup>H NMR (500 MHz, CDCl<sub>3</sub>) δ 7.18 (dd, *J* = 1.5, 8.0 Hz, 1H), 6.98 (t, *J* = 8.0 Hz, 1H), 6.94 (dd, *J* = 1.5, 8.0 Hz, 1H) 4.07 (s, 2H), 3.90 (s, 3H).

### 5-[(2-Methoxy-3-nitrophenyl)amino]methylidene}-2,2-dimethyl-4,6-dioxo-1,3-dioxane (S5).

A solution of 687.5 mg (4.77 mmol) Meldrum acid in 7.0 mL of trimethyl orthoformate was refluxed for 2 h, to which 700 mg (4.16 mmol) of 2-methoxy-3-nitroaniline was added and the resulting solution was refluxed for 2 h, and allowed to cool to room temperature, after which the solution was concentrated *in vacuo* to give a yellowish orange solid. The crude product was purified by column chromatography using 40% ethyl acetate in chloroform as the eluent, and silica



gel as the adsorbent medium to afford light orange solid 1.24g (93 %yield) TLC (40% ethyl acetate in chloroform)  $R_f = 0.45$ ; Melting Point 165-166°C;  $^1\text{H NMR}$  (500 MHz,  $\text{CDCl}_3$ )  $\delta$  11.73 (d,  $J = 13.5\text{Hz}$ , 1H), 8.67 (d,  $J = 14.5\text{Hz}$ , 1H), 7.73 (d,  $J = 8.5\text{Hz}$ , 1H), 7.61 (d,  $J = 8.0\text{Hz}$ , 1H), 7.32 (t,  $J = 8.3\text{Hz}$ , 1H), 4.07 (s, 3H), 1.78 (s, 6H);  $^{13}\text{C NMR}$  (100 MHz,  $\text{CDCl}_3$ )  $\delta$  165.6, 163.6, 151.4, 144.4, 134.3, 125.3, 122.5, 119.9, 106.0, 89.8, 63.5, 27.6; IR (neat)  $\nu_{\text{max}}$  3343.8, 2990.5, 2941.6, 2310.8, 1721.7, 1681.7, 1620.8, 1597.1, 1531.4, 1448.1; ESI-HRMS  $[\text{M} + \text{H}]^+$  calculated for  $\text{C}_{14}\text{H}_{15}\text{N}_2\text{O}_7$  323.0874 found 323.0879.

**8-Methoxy-7-nitroquinolin-4(1H)-one (S6).** To 250 mg (0.77 mmol) was added 9.0 mL of diphenyl ether, and the mixture was refluxed for 30 min. The reaction mixture was cooled and diluted with hexane. The precipitated crystals were collected by filtration and washed with hexane. The crystals were dried *in vacuo* to give 140 mg (82% yield). TLC (ethyl acetate)  $R_f = 0.11$ ; Melting Point 228-230 °C;  $^1\text{H NMR}$  (500 MHz,  $\text{DMSO-d}_6$ )  $\delta$  11.85 (broad s, 1H), 7.96 (d,  $J = 9.5$  Hz, 2H), 7.76 (d,  $J = 8.5$  Hz, 1H), 6.18 (d,  $J = 6.5$  Hz, 1H) 3.98 (s, 3H);  $^{13}\text{C NMR}$  (125 MHz,  $\text{DMSO-d}_6$ )  $\delta$  175.9, 143.5, 143.1, 140.8, 135.1, 128.8, 120.9, 117.6, 110.5, 63.3; IR (neat)  $\nu_{\text{max}}$  3195.6, 2840.1, 2375.6, 2321.6, 1527.1, 1456.8, 1353.8; ESI-HRMS  $[\text{M} + \text{H}]^+$  calculated for  $\text{C}_{10}\text{H}_9\text{N}_2\text{O}_7$  221.0557, found 221.056

### Scheme S1. Synthesis of key halogenated quinoline intermediate 4.

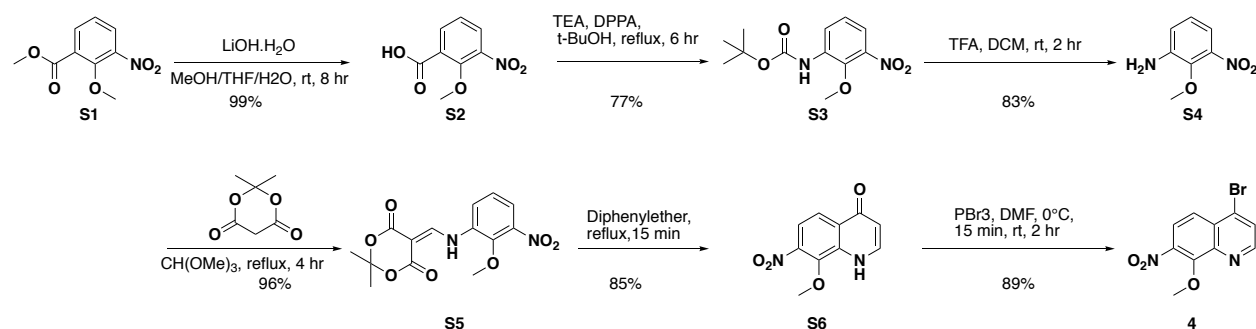

7-Acetamido-4-(2-nitrophenyl)-5,8-dimethoxyquinoline (1)

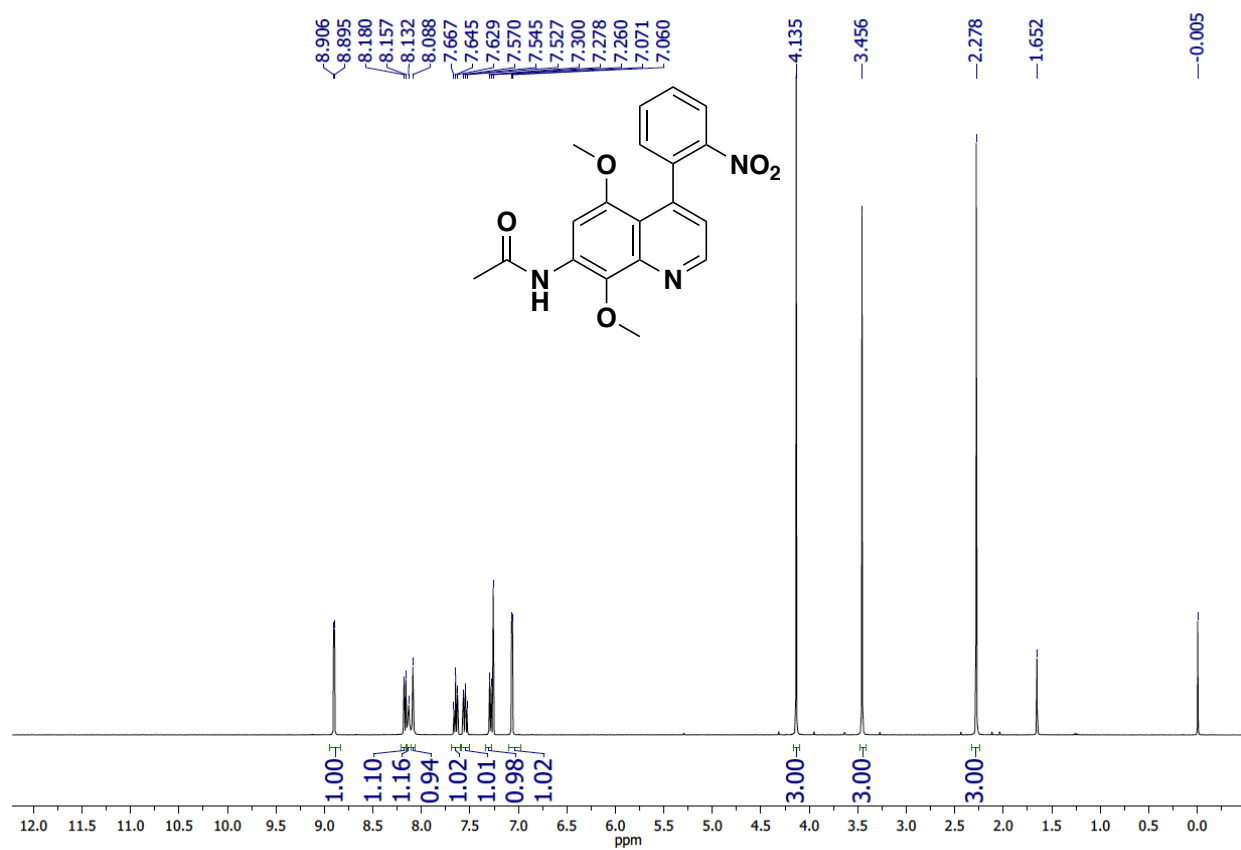

7-Acetamido-4-(2-benzamidophenyl)-5,8-dimethoxyquinoline (2)

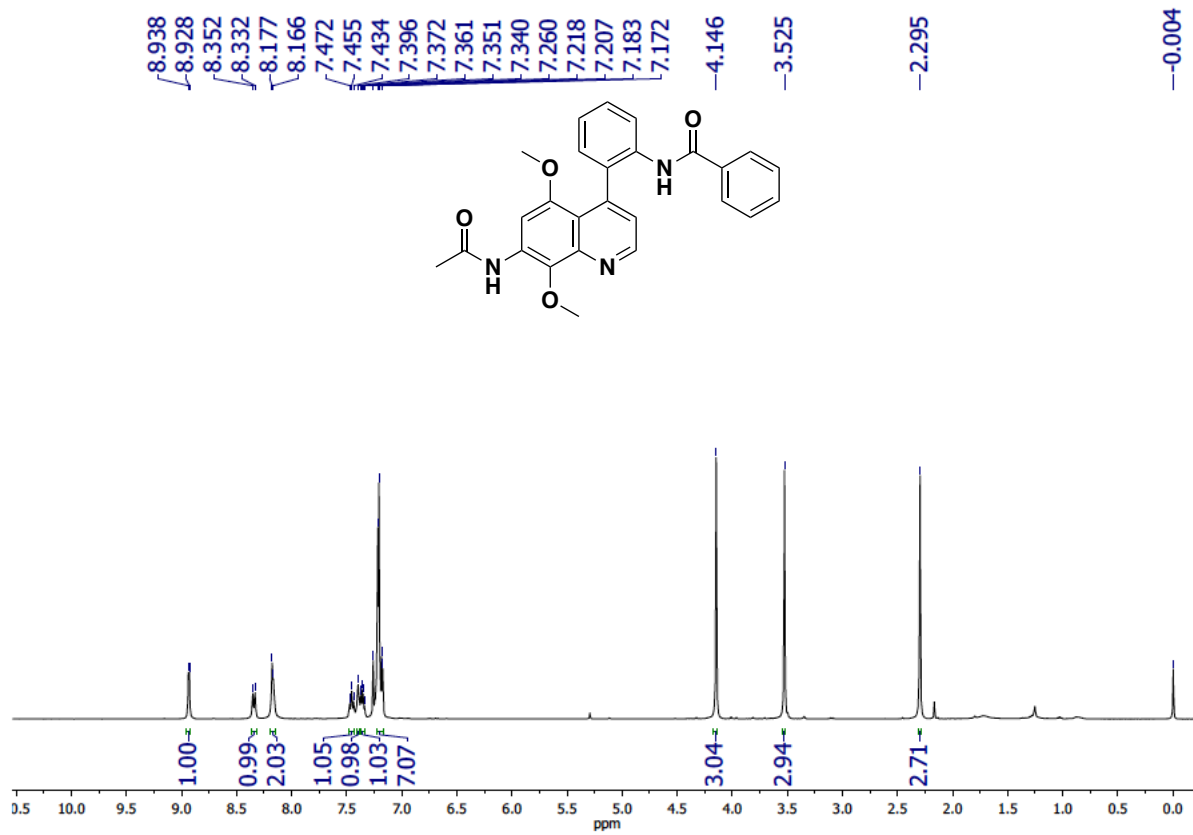

7-Acetamido-4-(2-benzamidophenyl)-5,8-dimethoxyquinoline (2)

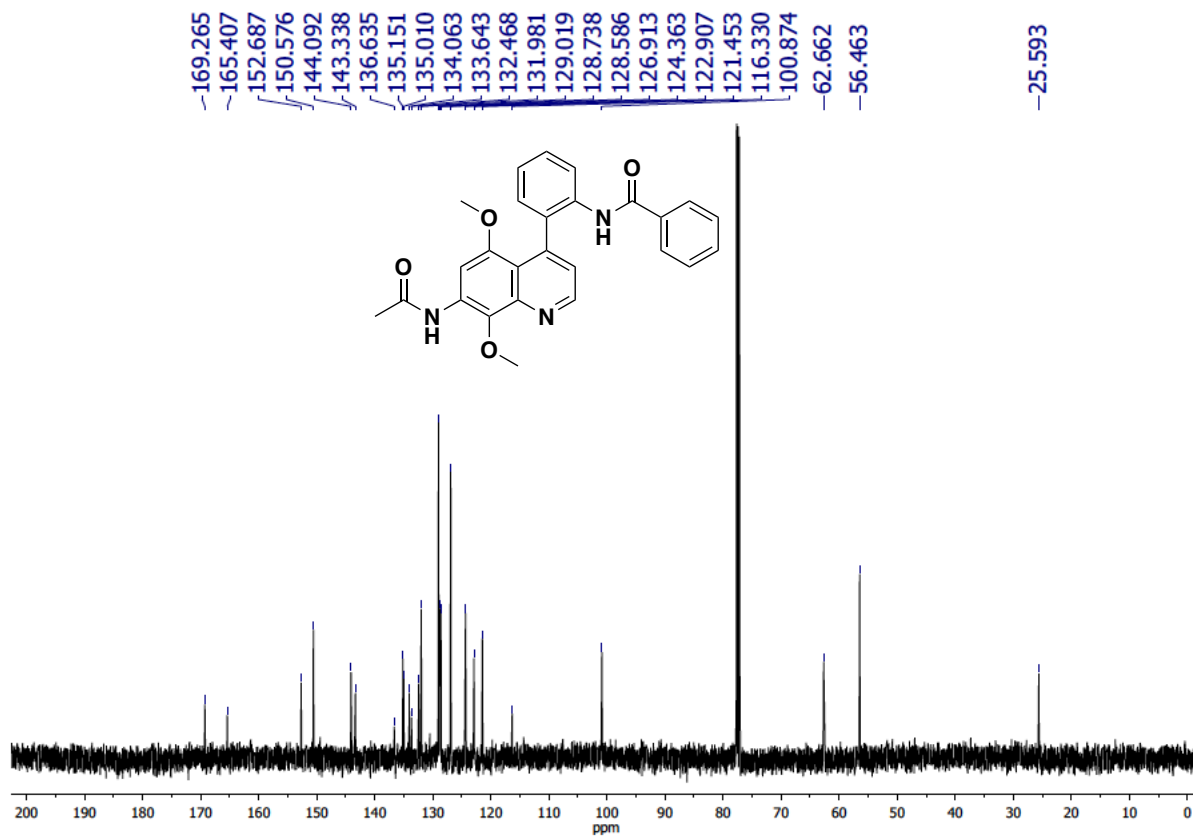

7-Acetamido-4-(2-benzamidophenyl)-5,8-dimethoxyquinoline (2)

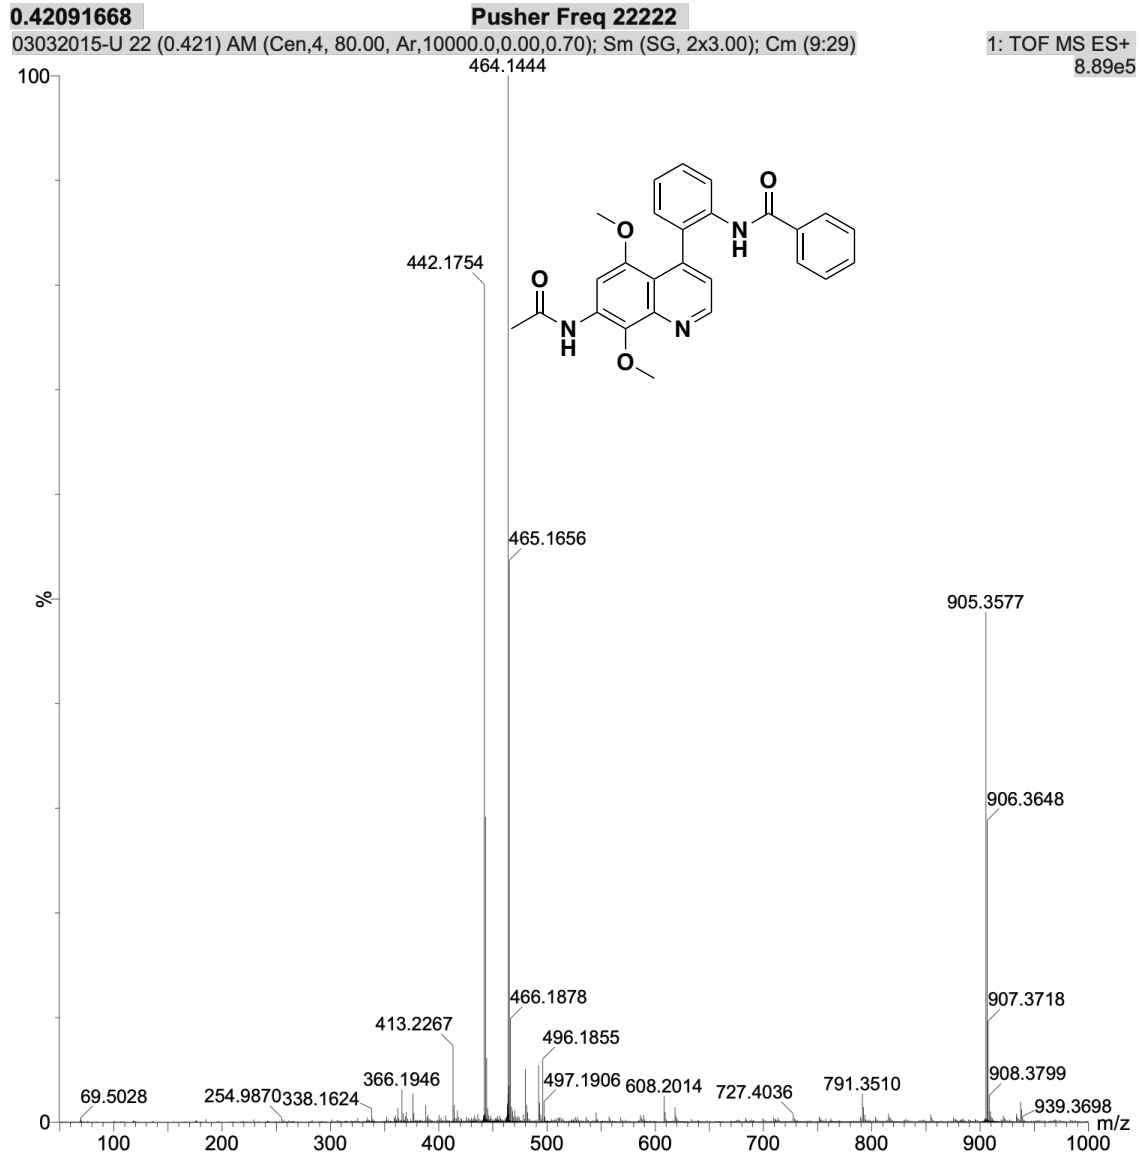

7-Acetamido-4-(2-benzamidophenyl)-5,8-dimethoxyquinoline (2)

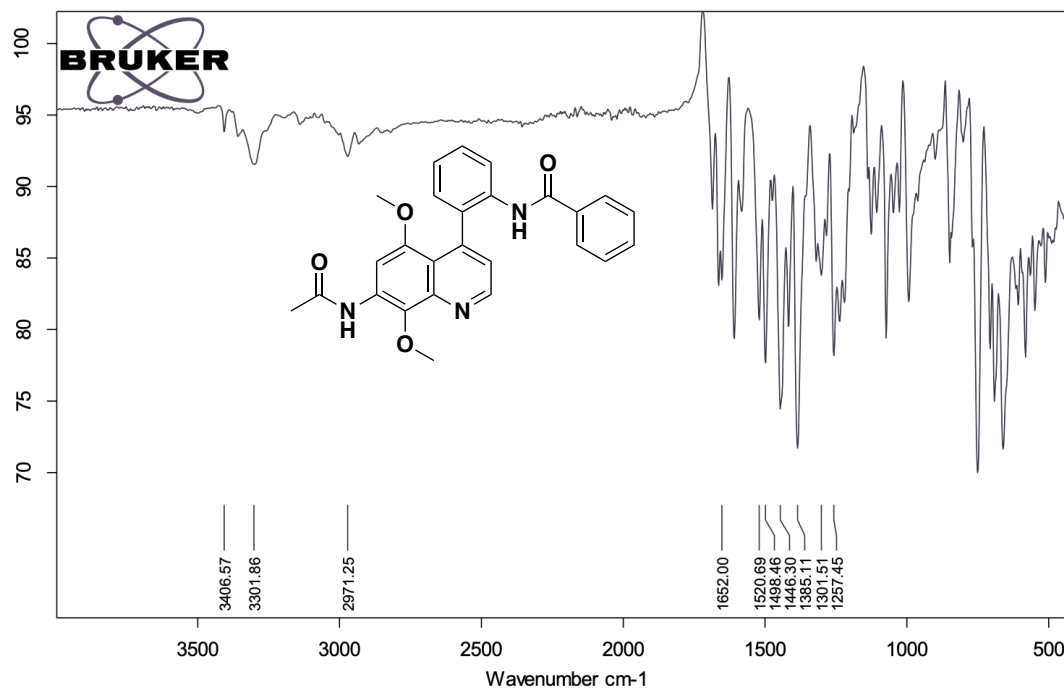

7-Acetamido-4-(2-benzamidophenyl)-8-hydroxy-5-methoxyquinoline (3) in DMSO-d<sub>6</sub>

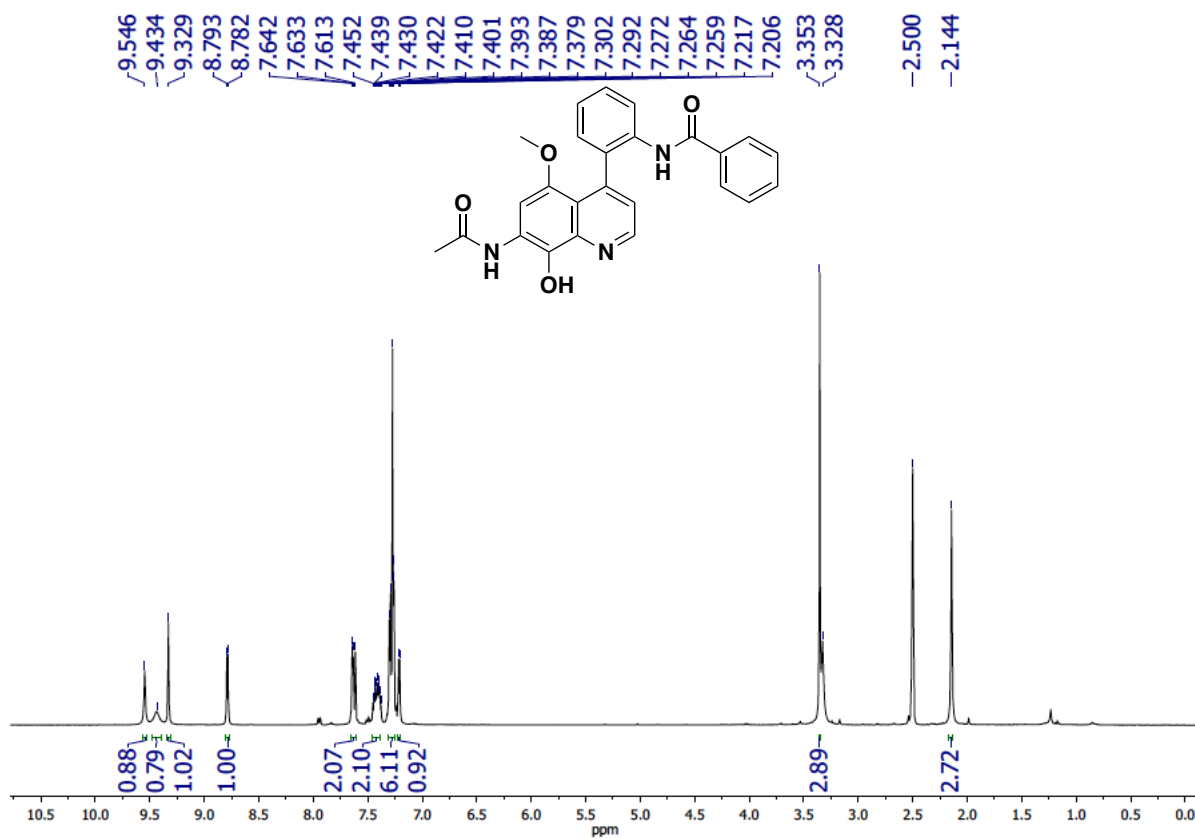

7-Acetamido-4-(2-benzamidophenyl)-8-hydroxy-5-methoxyquinoline (3) in CDCl<sub>3</sub>

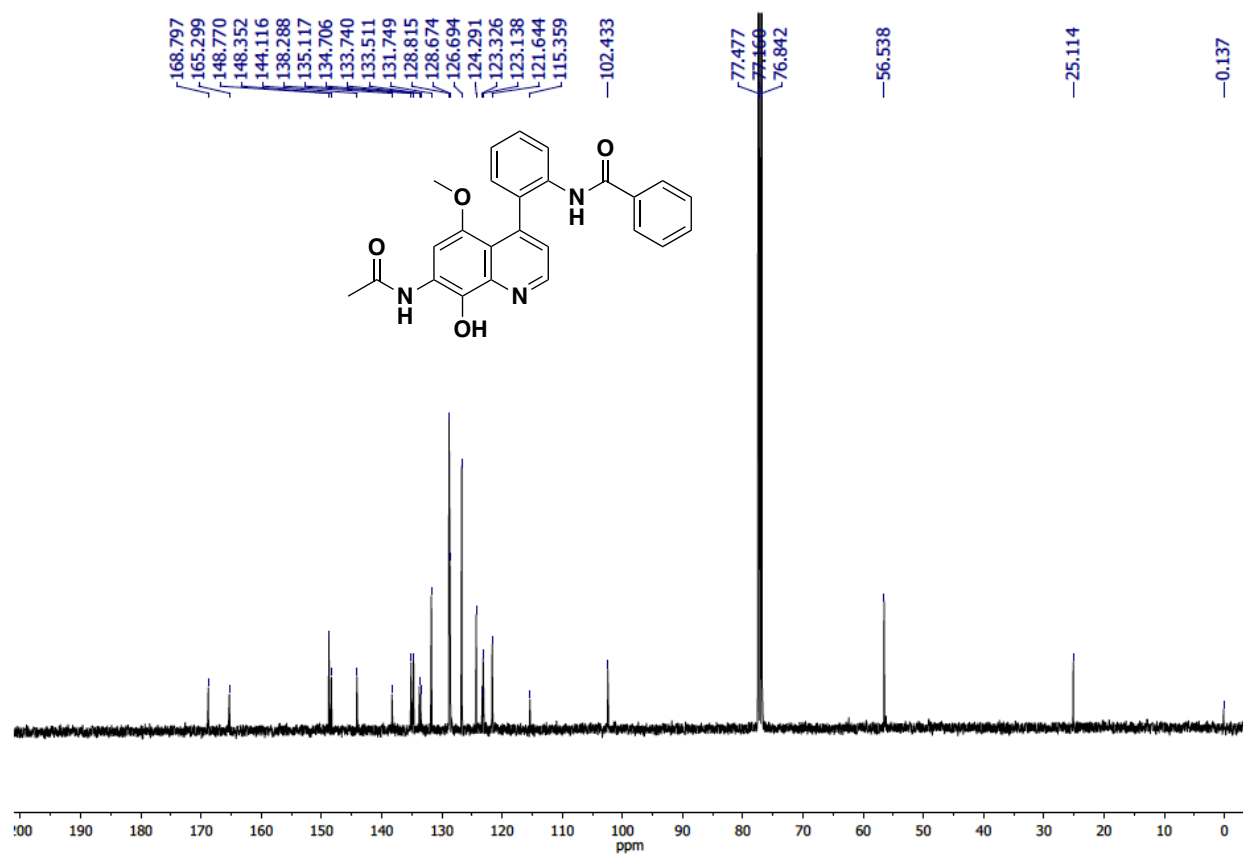



7-Acetamido-4-(2-benzamidophenyl)-8-hydroxy-5-methoxyquinoline (3)

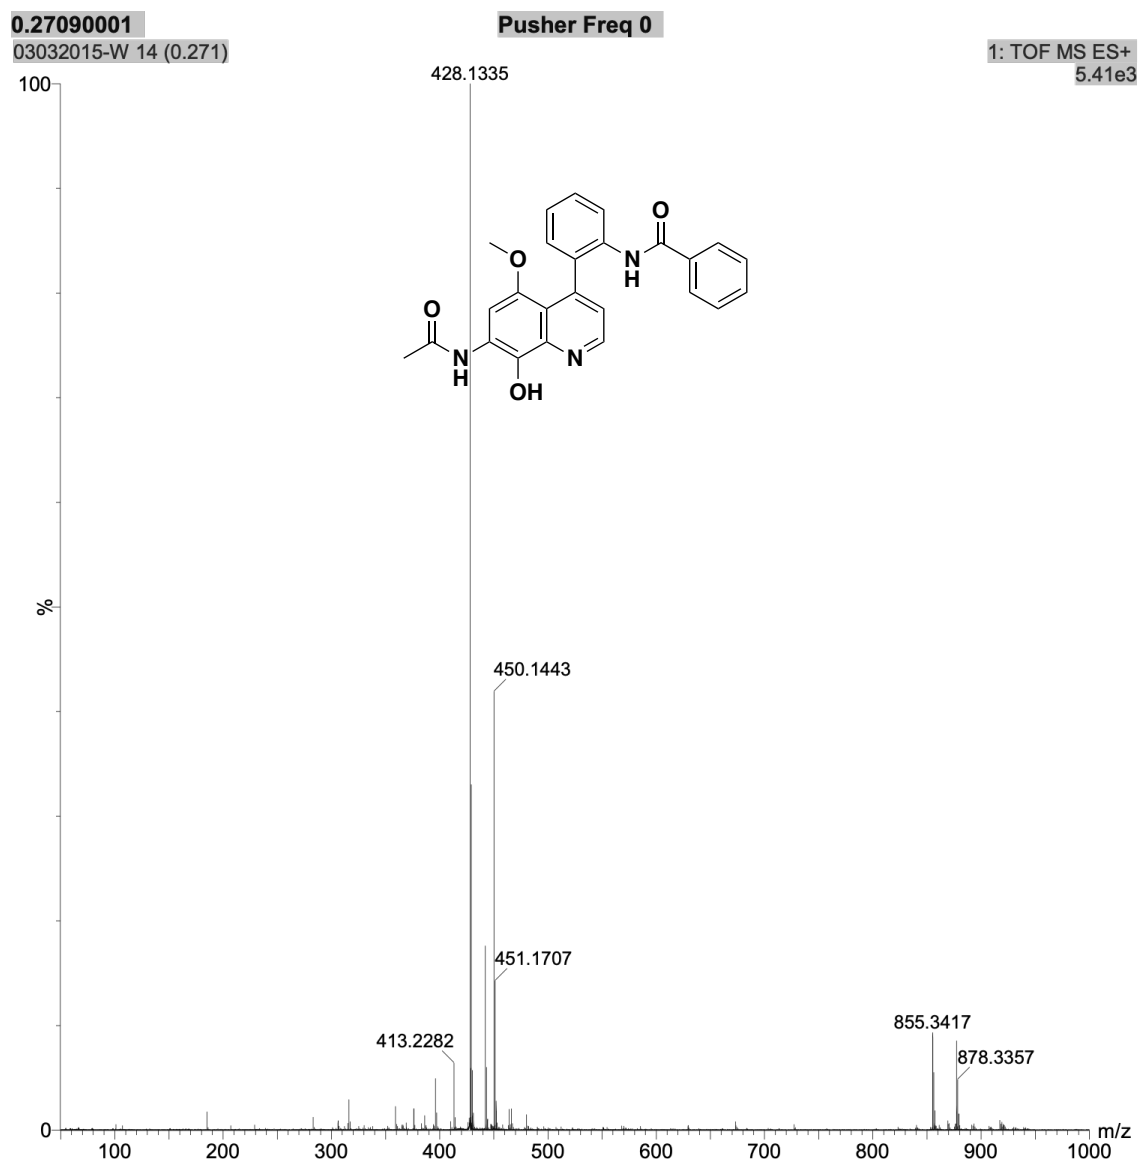

7-Acetamido-4-(2-benzamidophenyl)-8-hydroxy-5-methoxyquinoline (3)

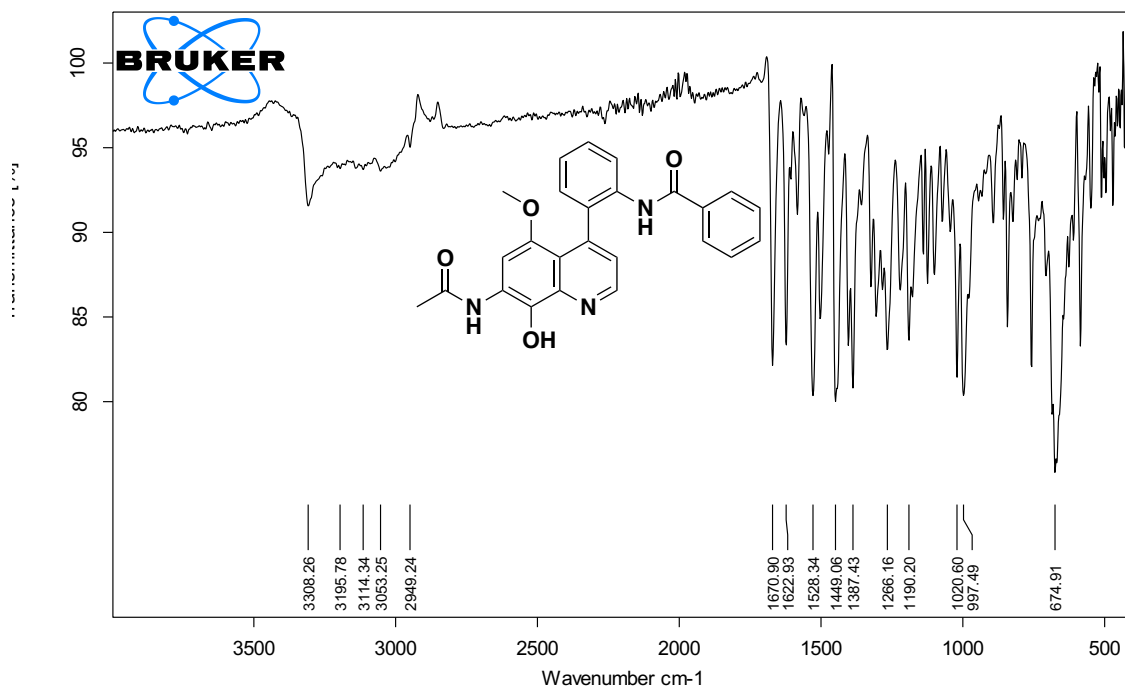

4-Bromo-8-methoxy-7-nitroquinoline (4) in CDCl<sub>3</sub>

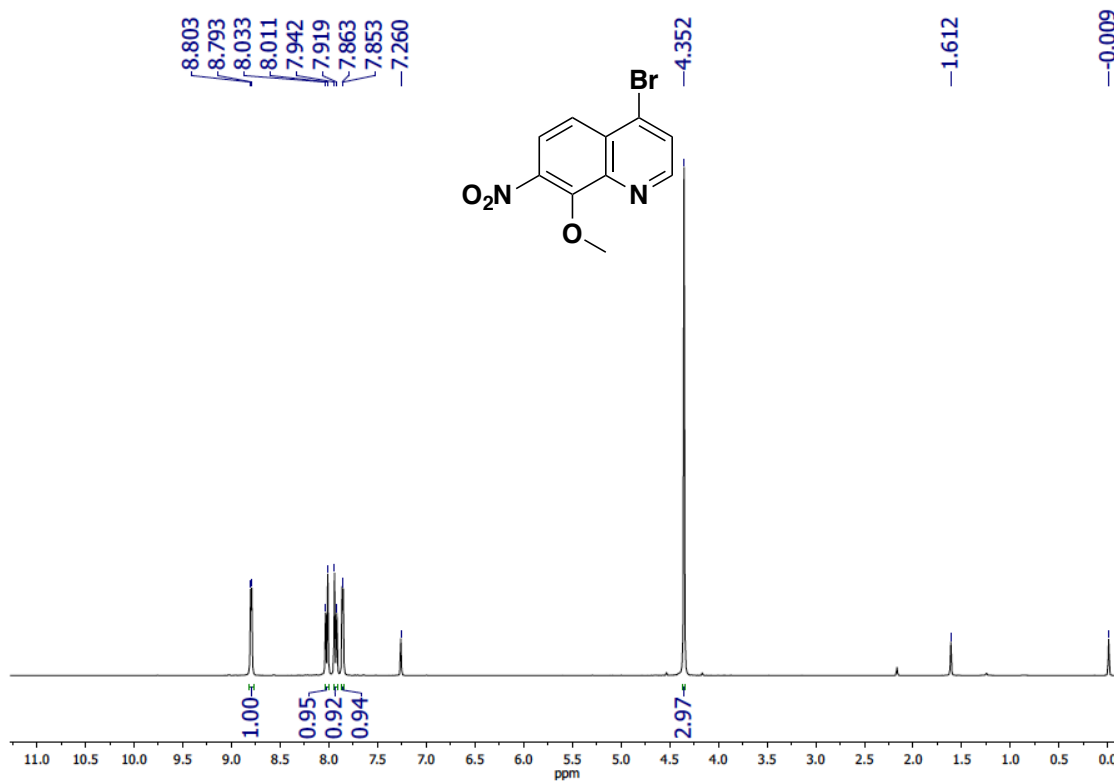

4-Bromo-8-methoxy-7-nitroquinoline (4) in CDCl<sub>3</sub>

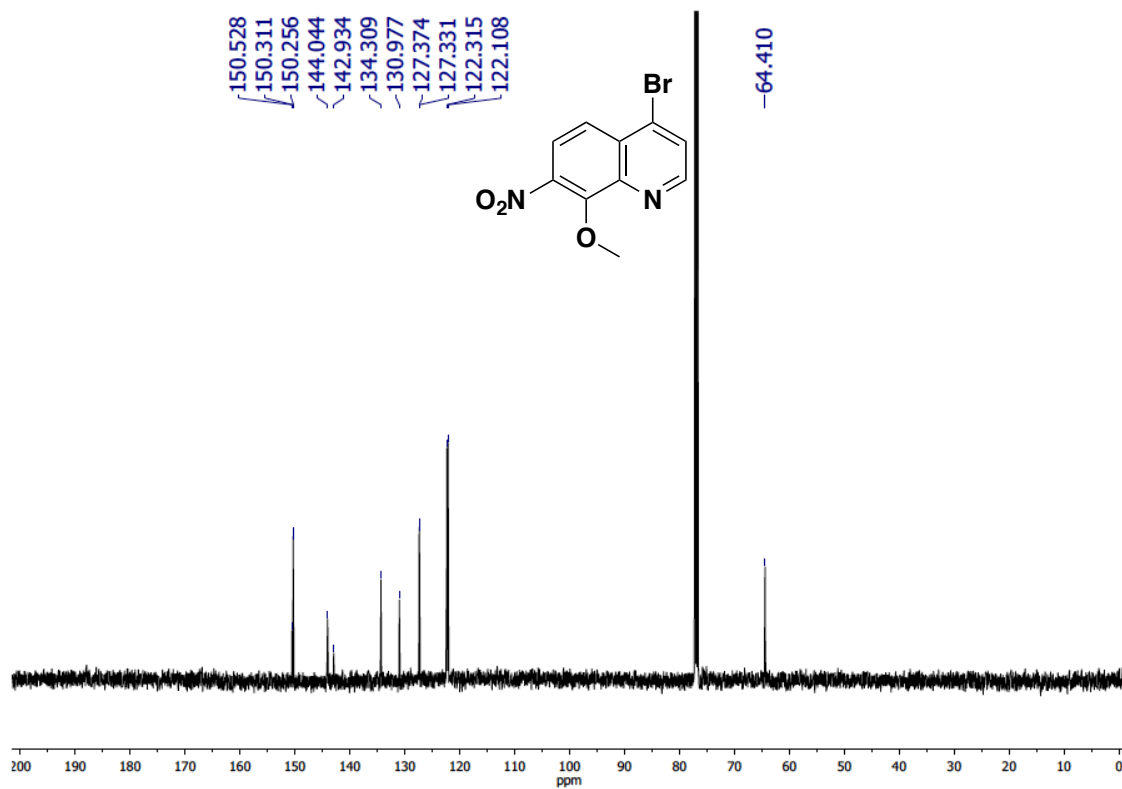

4-Bromo-8-methoxy-7-nitroquinoline (4)

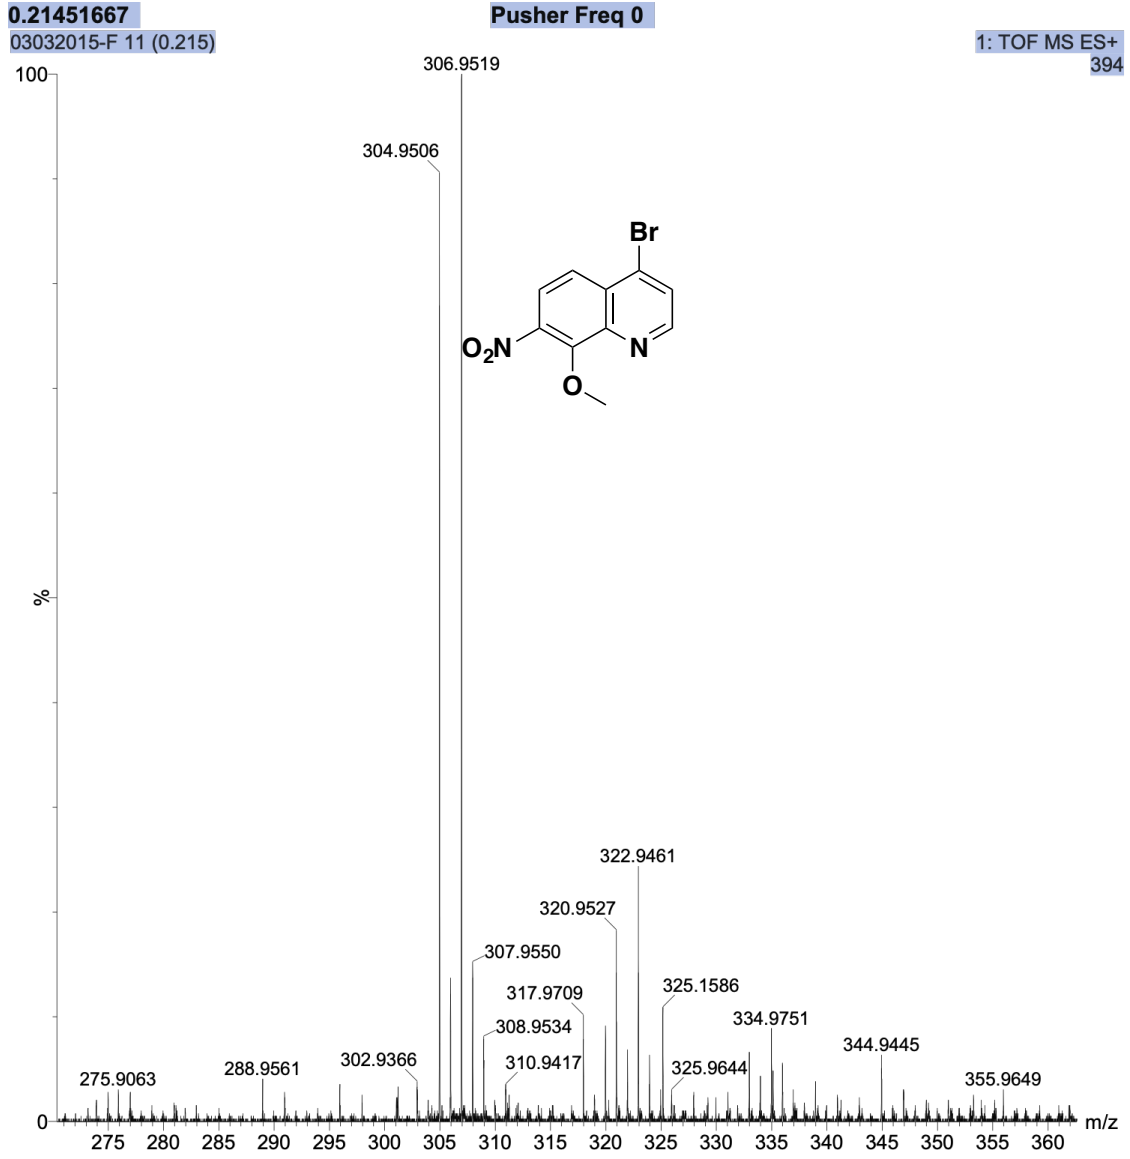

### 4-Bromo-8-methoxy-7-nitroquinoline (4)

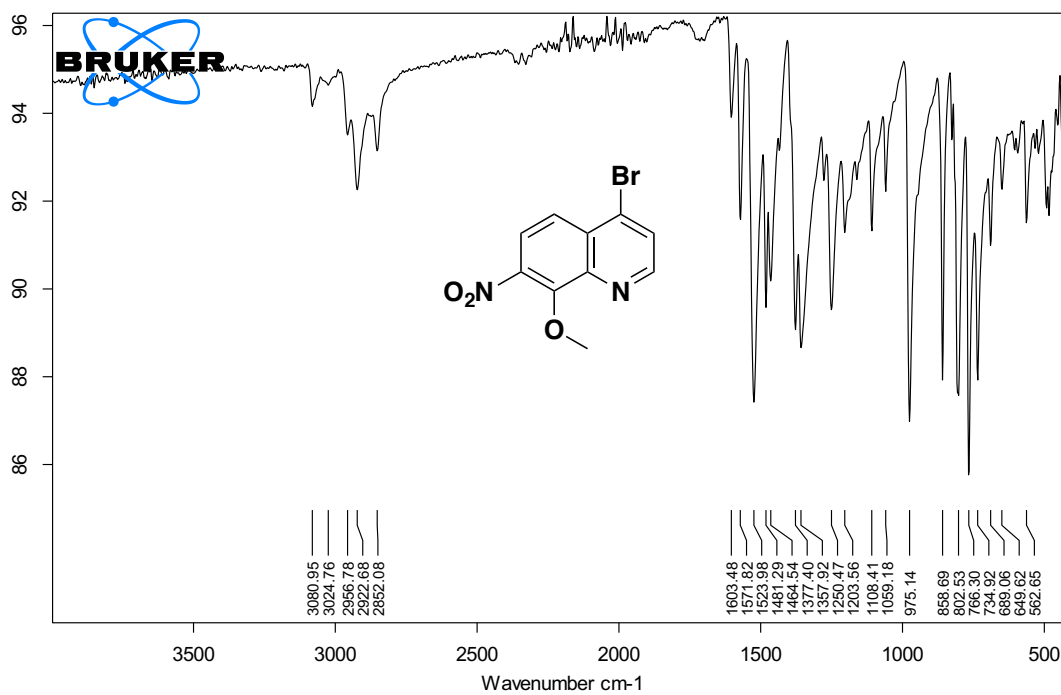

7-Acetamido-4-bromo-8-methoxyquinoline (5) in CDCl<sub>3</sub>

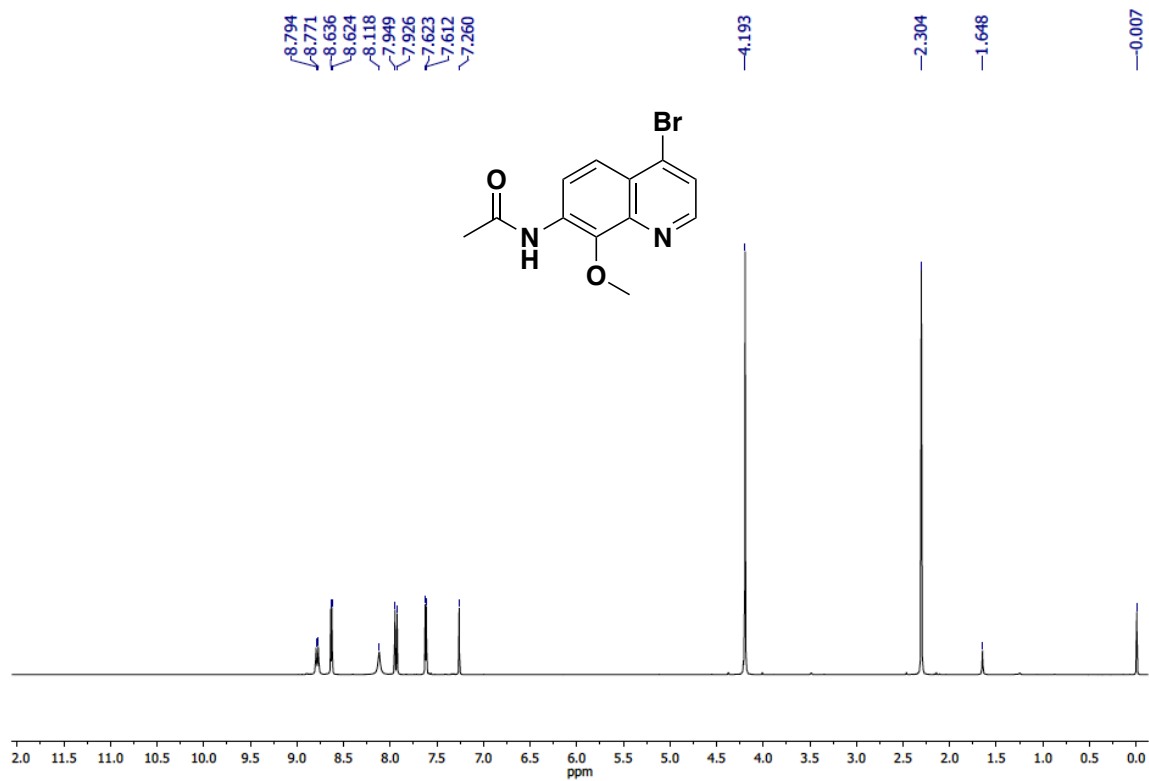

7-Acetamido-4-bromo-8-methoxyquinoline (5) in CDCl<sub>3</sub>

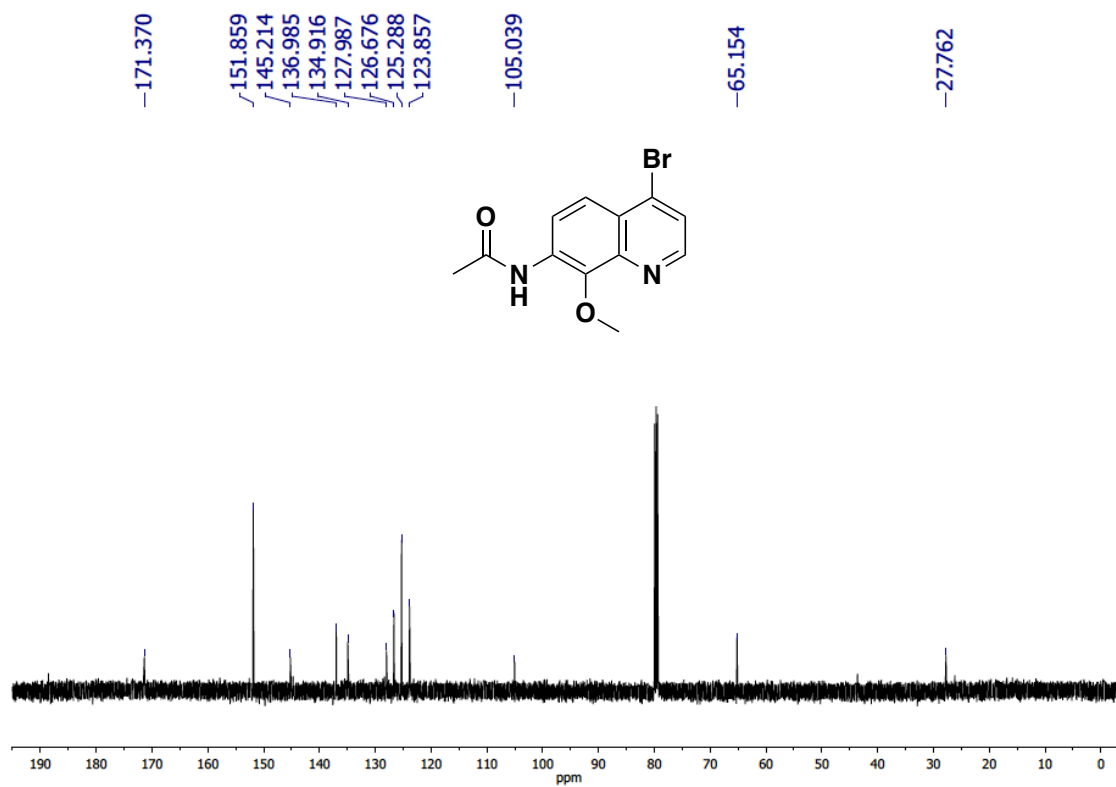



7-Acetamido-4-bromo-8-methoxyquinoline (5)

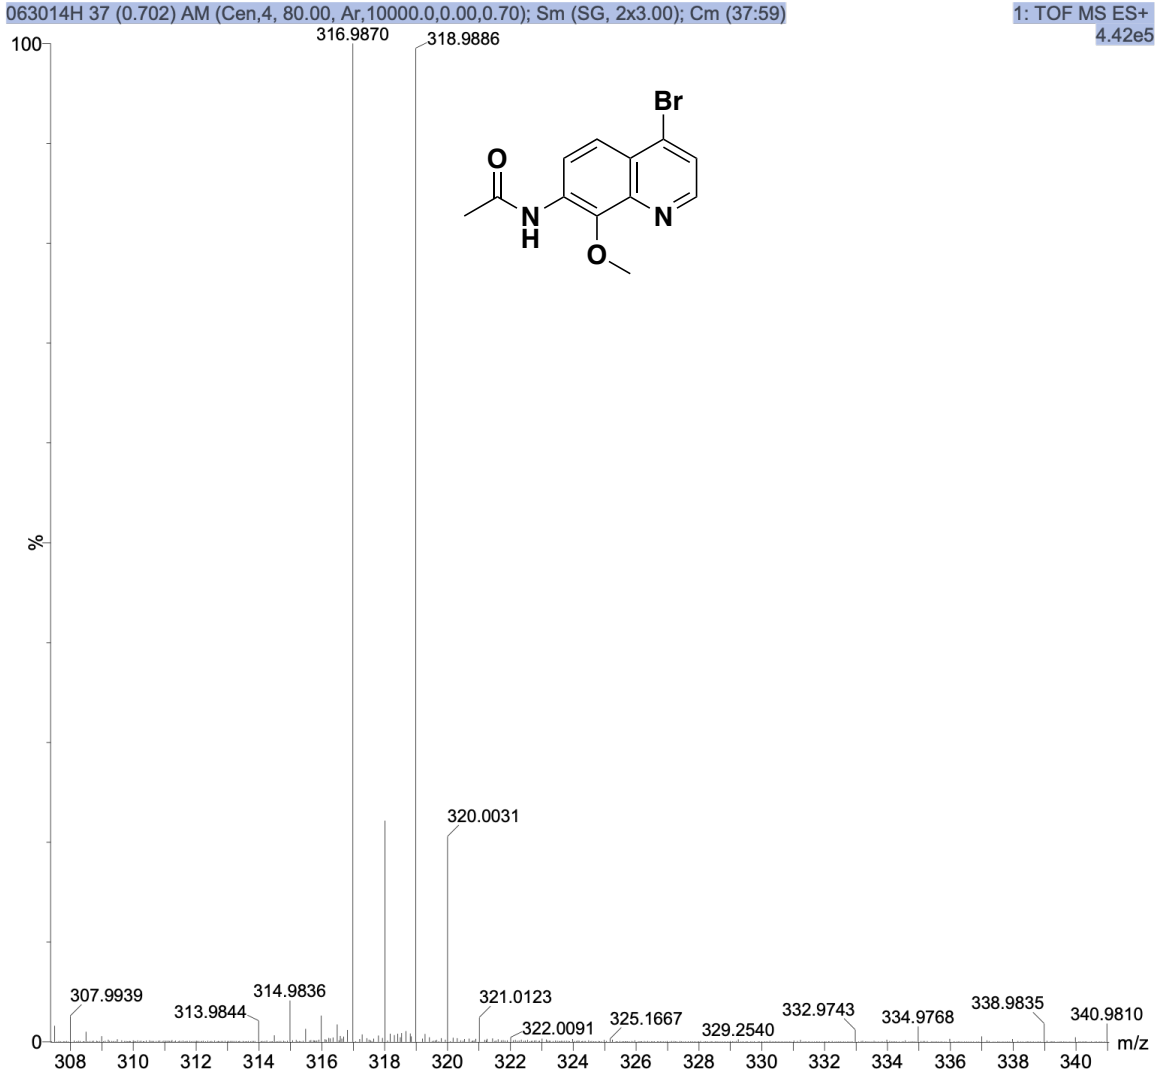

7-Acetamido-4-bromo-8-methoxyquinoline (5)

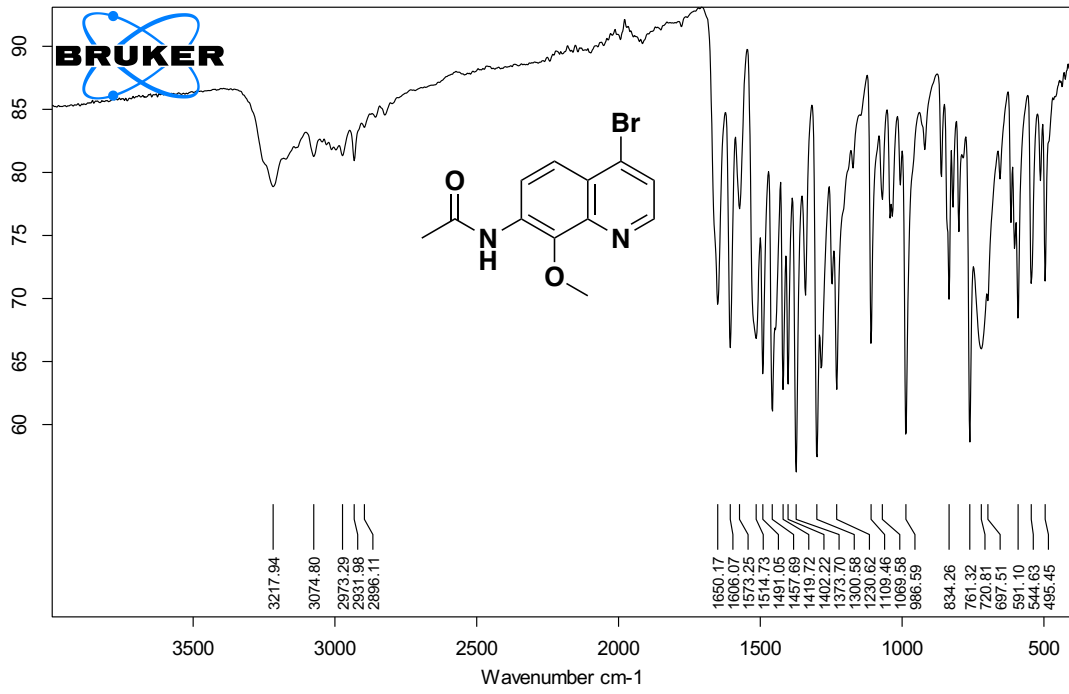

7-Acetamido-4-(5-fluoro-2-methoxyphenyl)-8-methoxyquinoline (6) in CDCl<sub>3</sub>

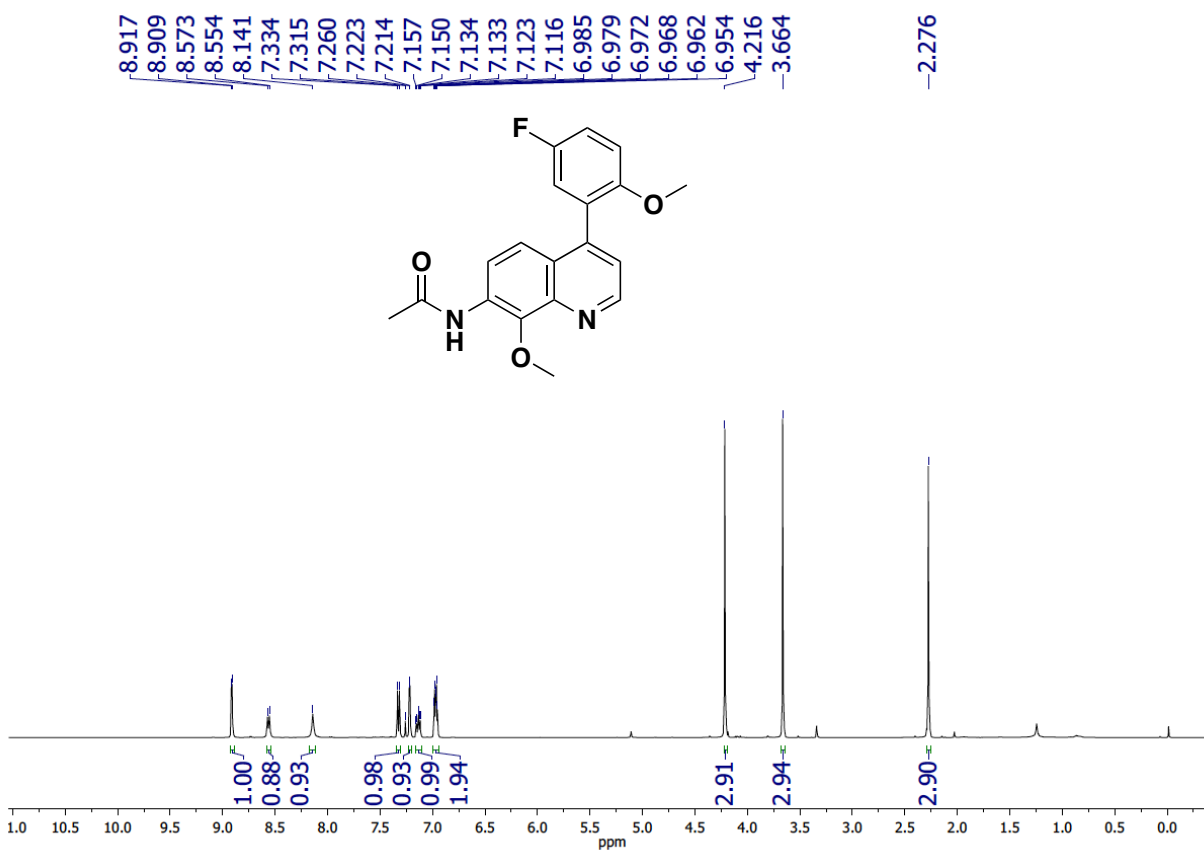

-Acetamido-4-(5-fluoro-2-methoxyphenyl)-8-methoxyquinoline (6) in CDCl<sub>3</sub>

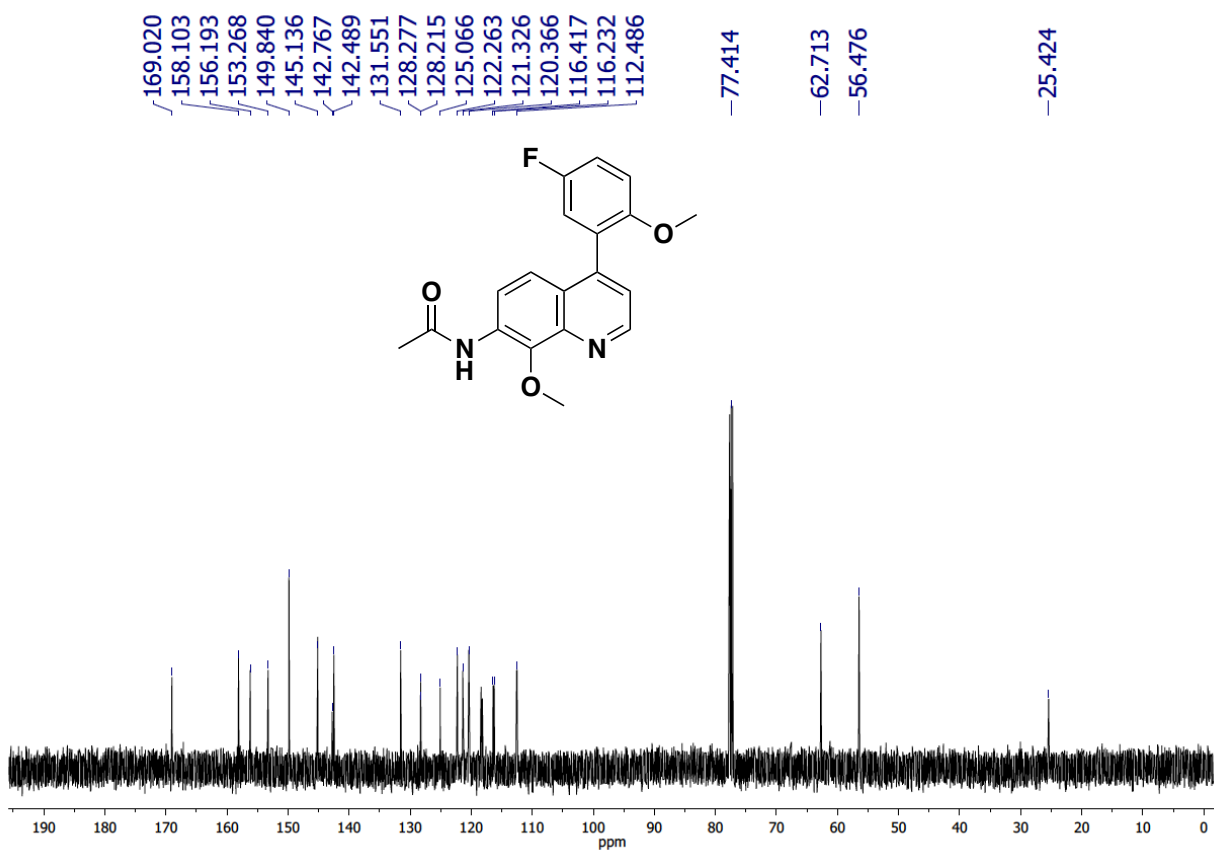

-Acetamido-4-(5-fluoro-2-methoxyphenyl)-8-methoxyquinoline (6)

0.02646667  
03302015-Q 1 (0.026)

Pusher Freq 22222

1: TOF MS ES+  
1.27e3

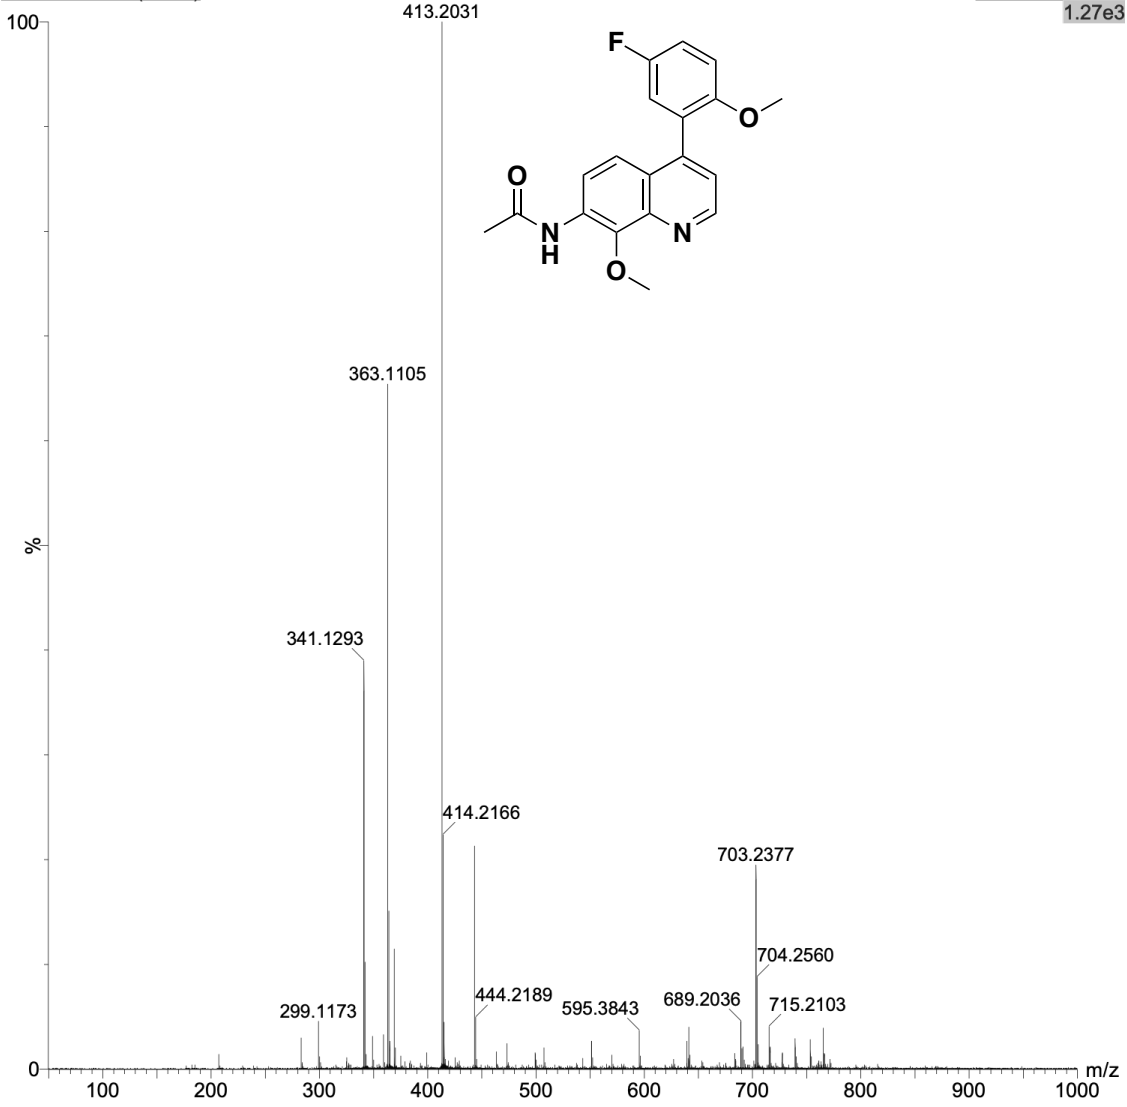

7-Acetamido-4-(5-fluoro-2-methoxyphenyl)-8-methoxyquinoline (6)

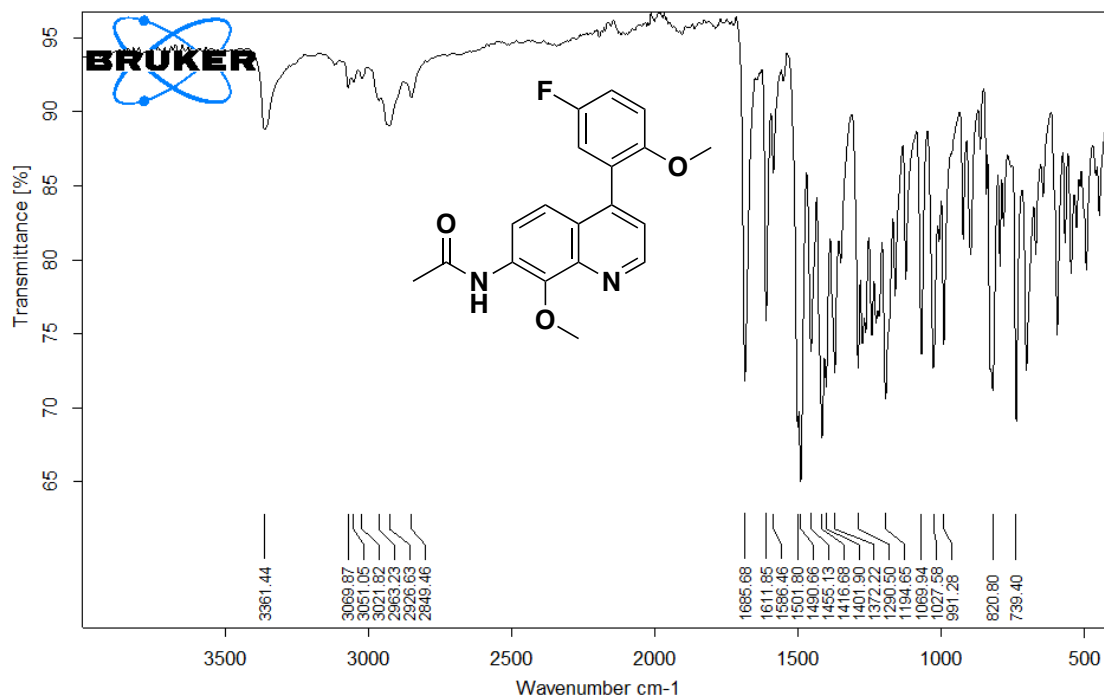

7-Acetamido-4-(5-fluoro-2-hydroxyphenyl)-8-hydroxyquinoline (7) in DMSO-d<sub>6</sub>

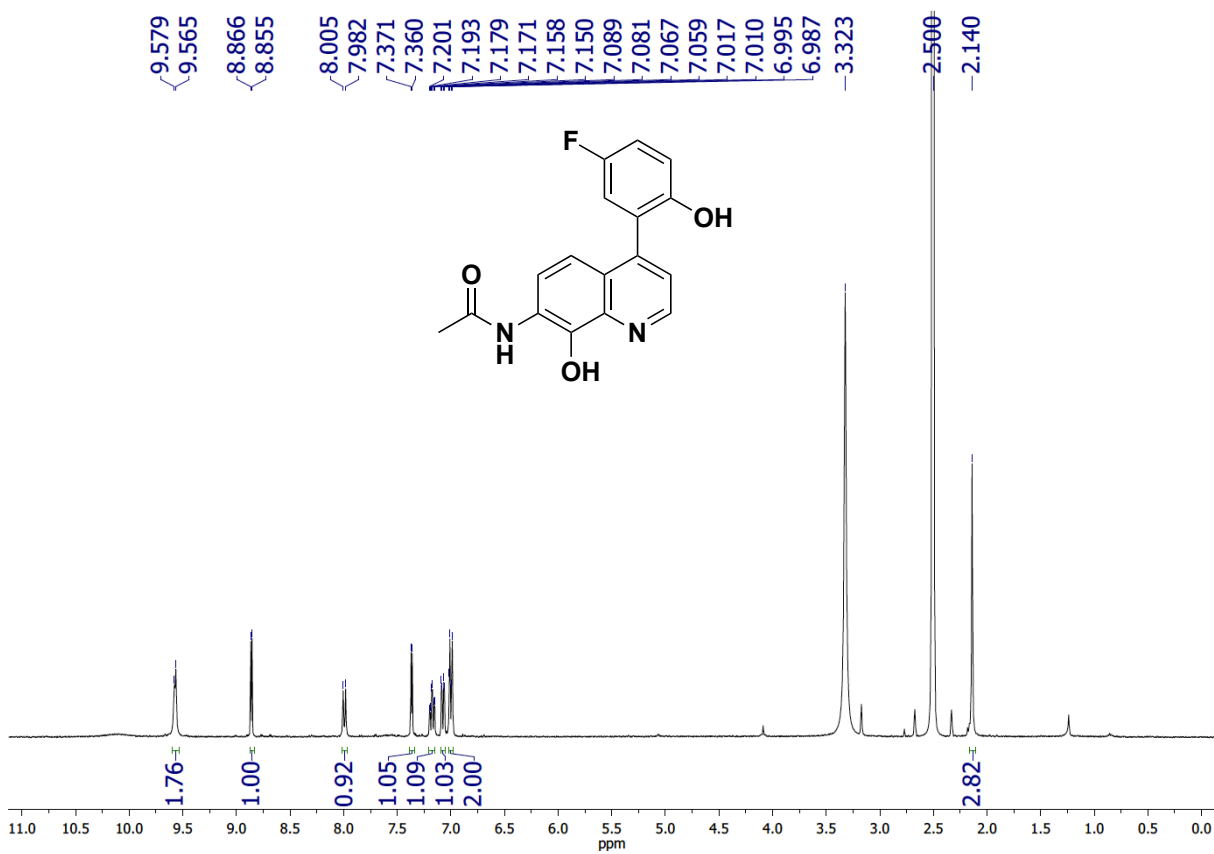

7-Acetamido-4-(5-fluoro-2-hydroxyphenyl)-8-hydroxyquinoline (7) in DMSO-d<sub>6</sub>

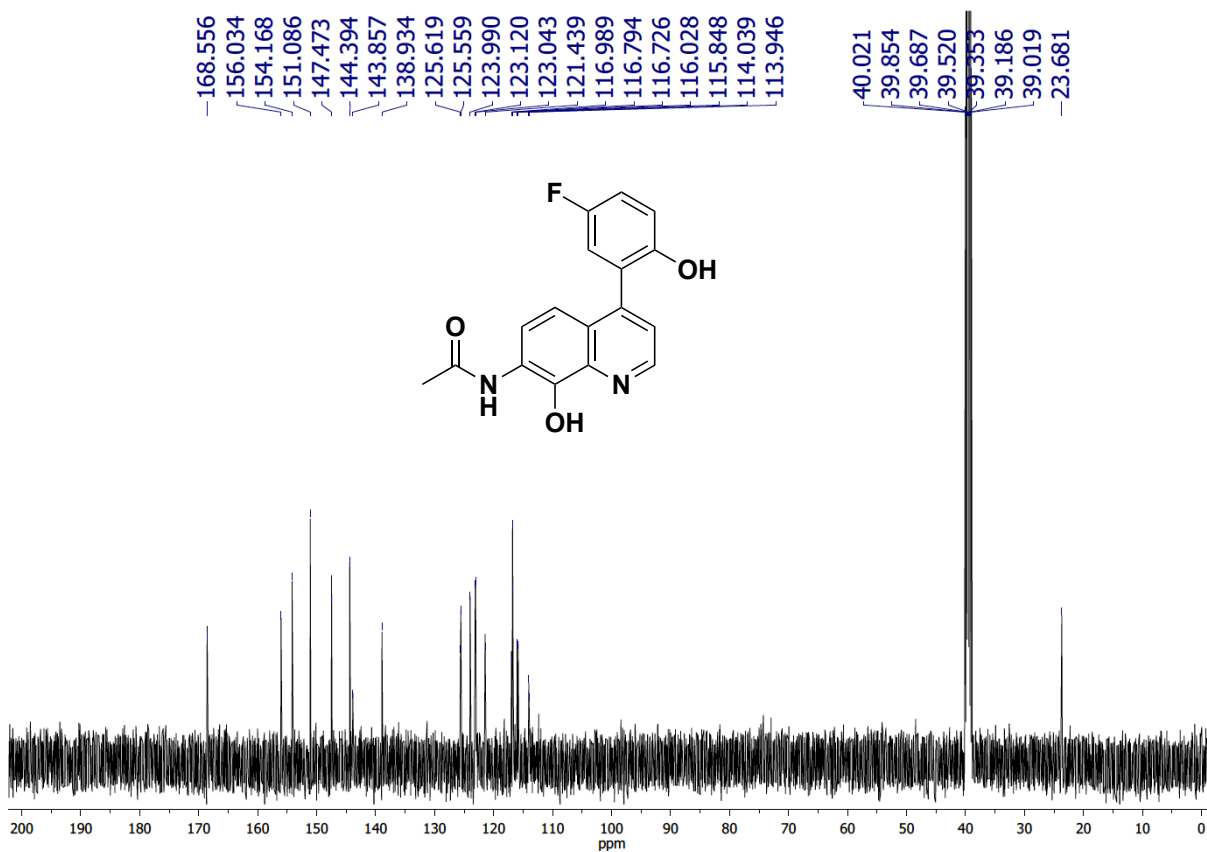



7-Acetamido-4-(5-fluoro-2-hydroxyphenyl)-8-hydroxyquinoline (7)

6.62683344  
071415-D 352 (6.627)

Pusher Freq 0

1: TOF MS ES+  
1.64e3

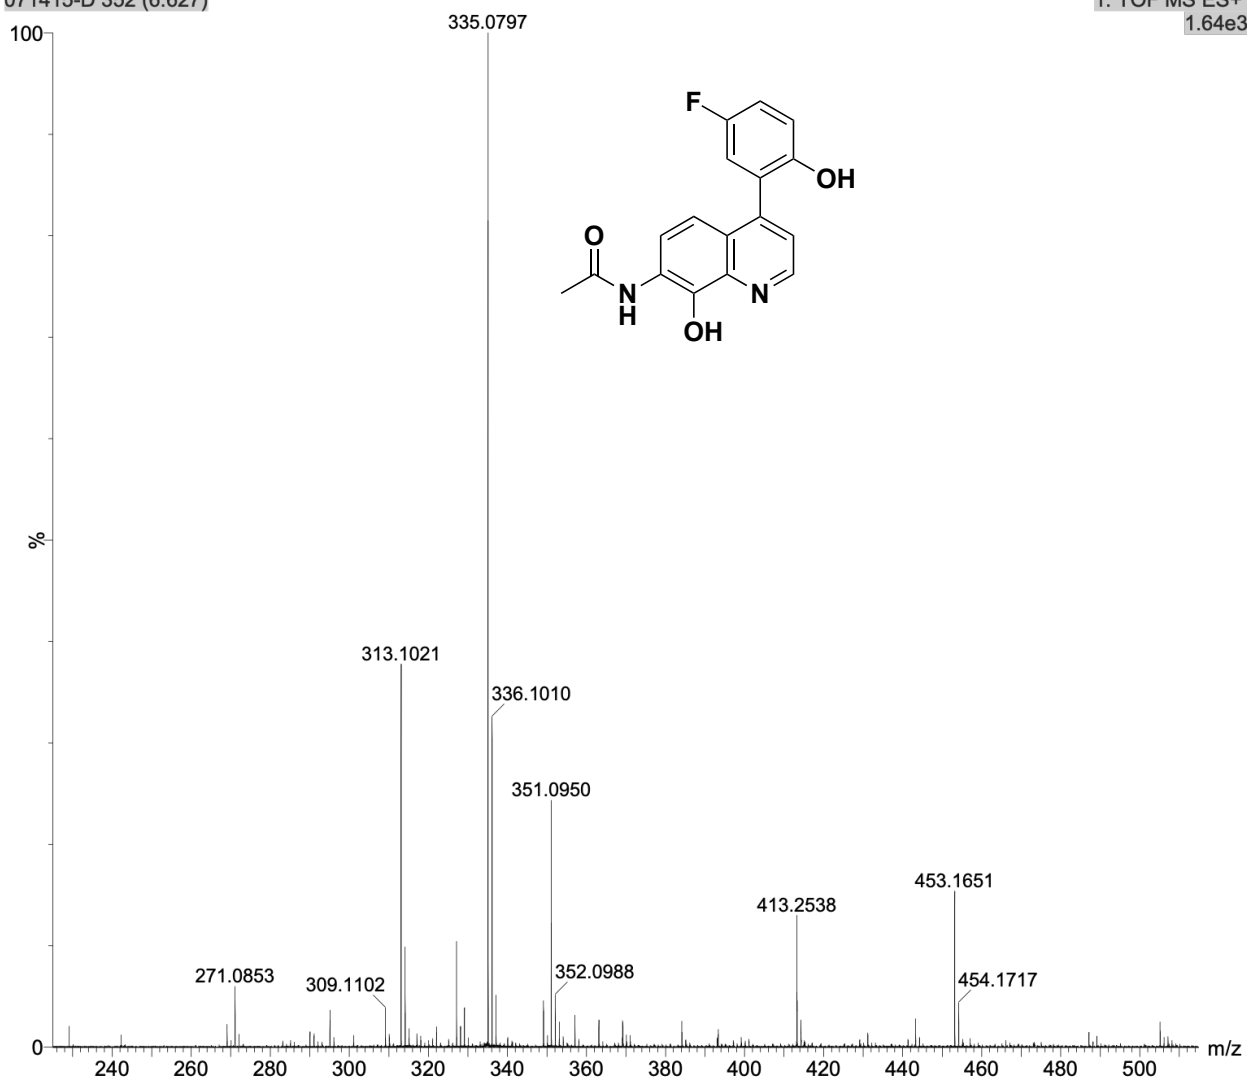

7-Acetamido-4-(5-fluoro-2-hydroxyphenyl)-8-hydroxyquinoline (7)

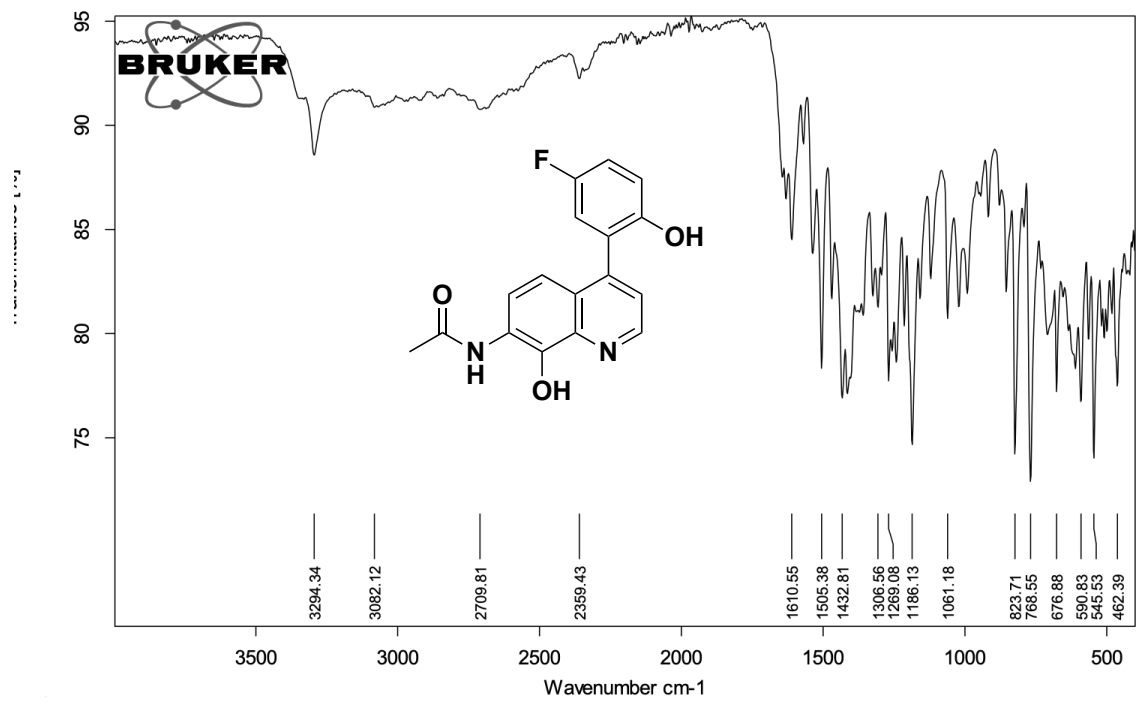

4-Bromo-8-methoxy-7-pivalamidoquinoline (8) in CDCl<sub>3</sub>

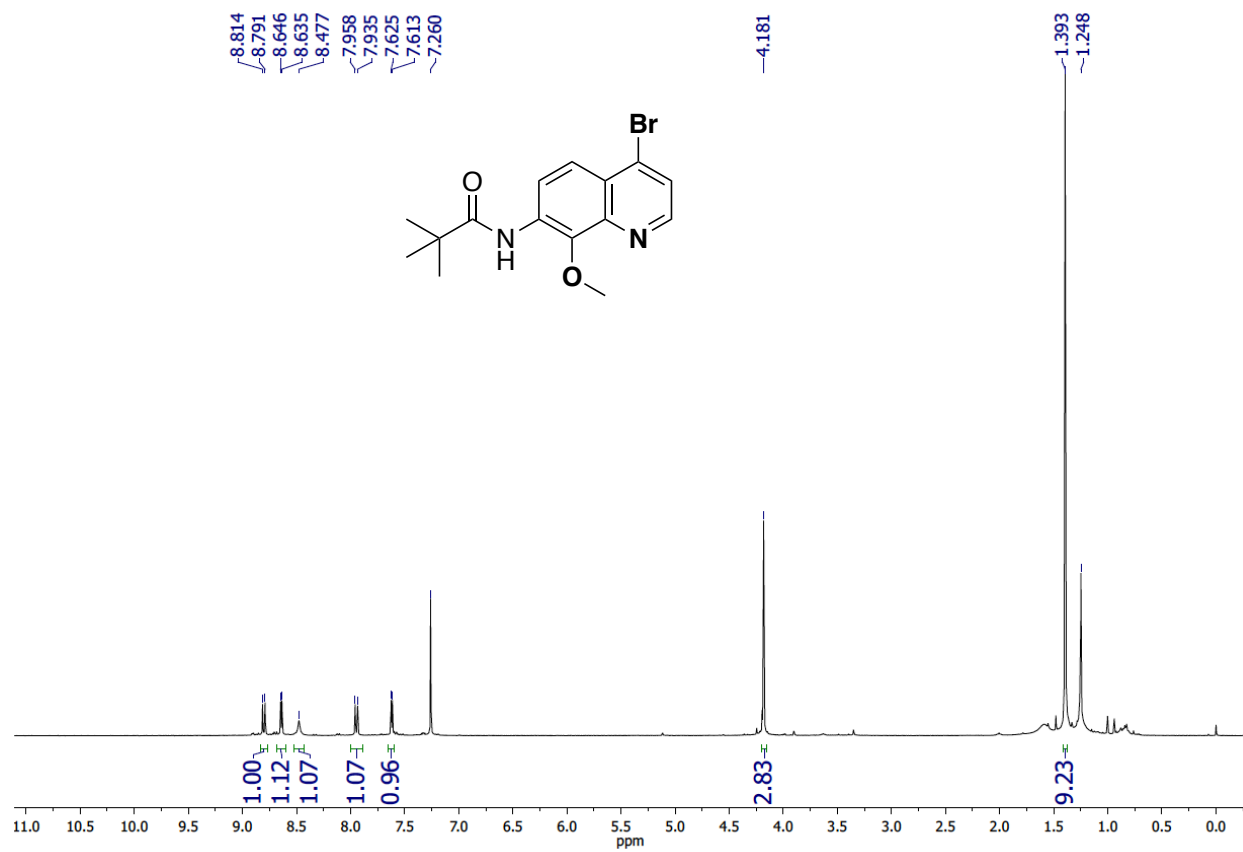

4-Bromo-8-methoxy-7-pivalamidoquinoline (8) in CDCl<sub>3</sub>

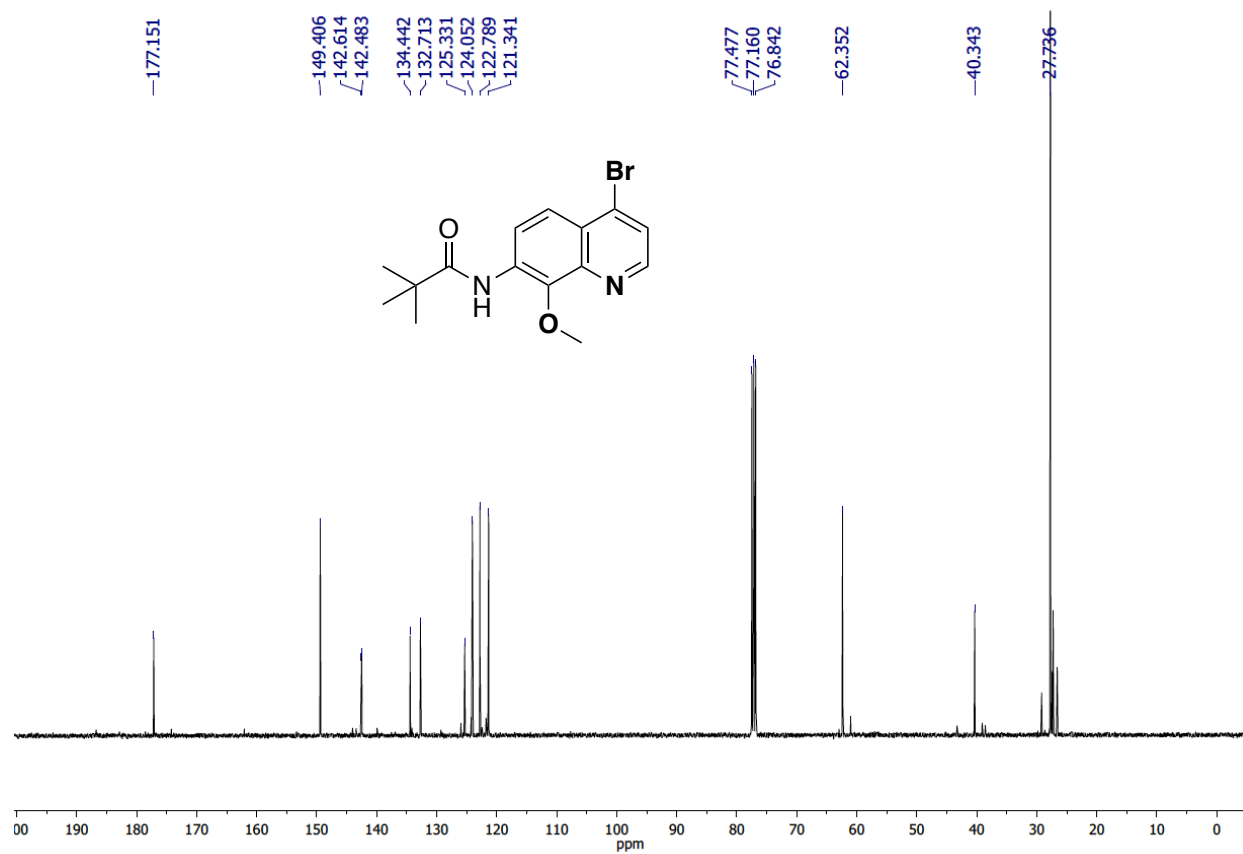

4-Bromo-8-methoxy-7-pivalamidoquinoline (8)

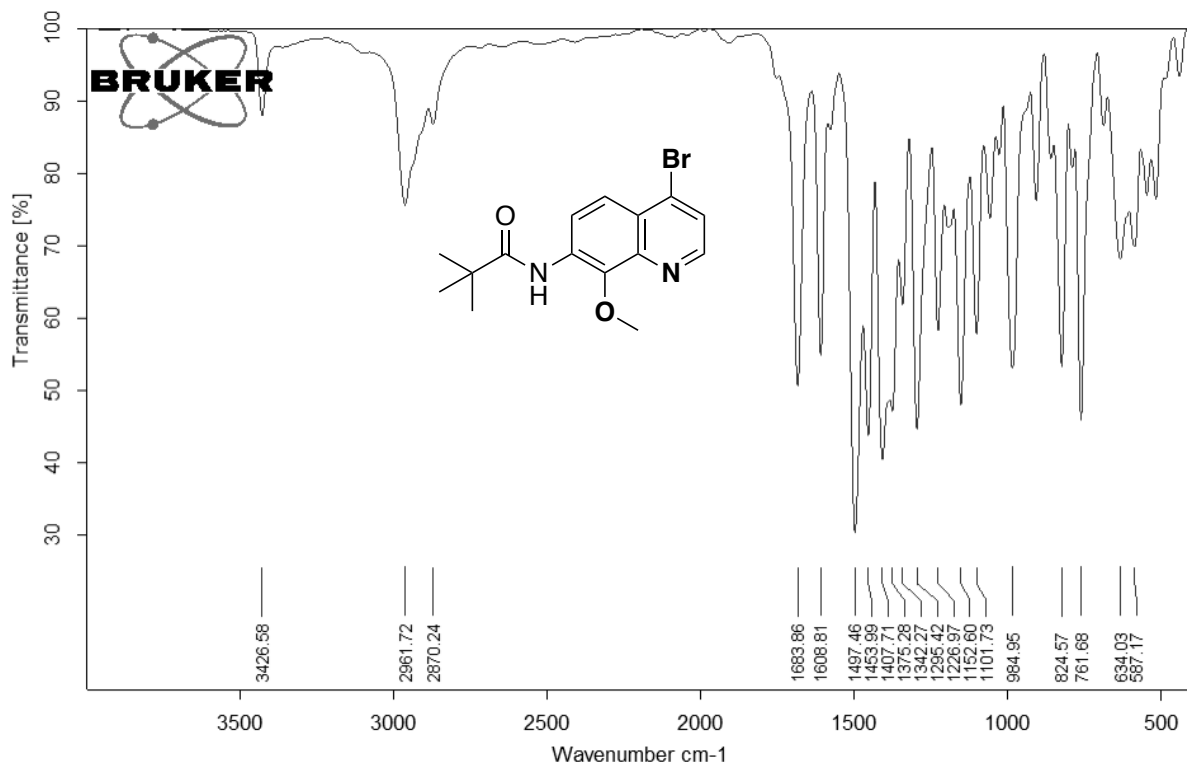

4-Bromo-8-methoxy-7-(2-(morpholin-4-yl)acetamido)quinoline (9) in CDCl<sub>3</sub>

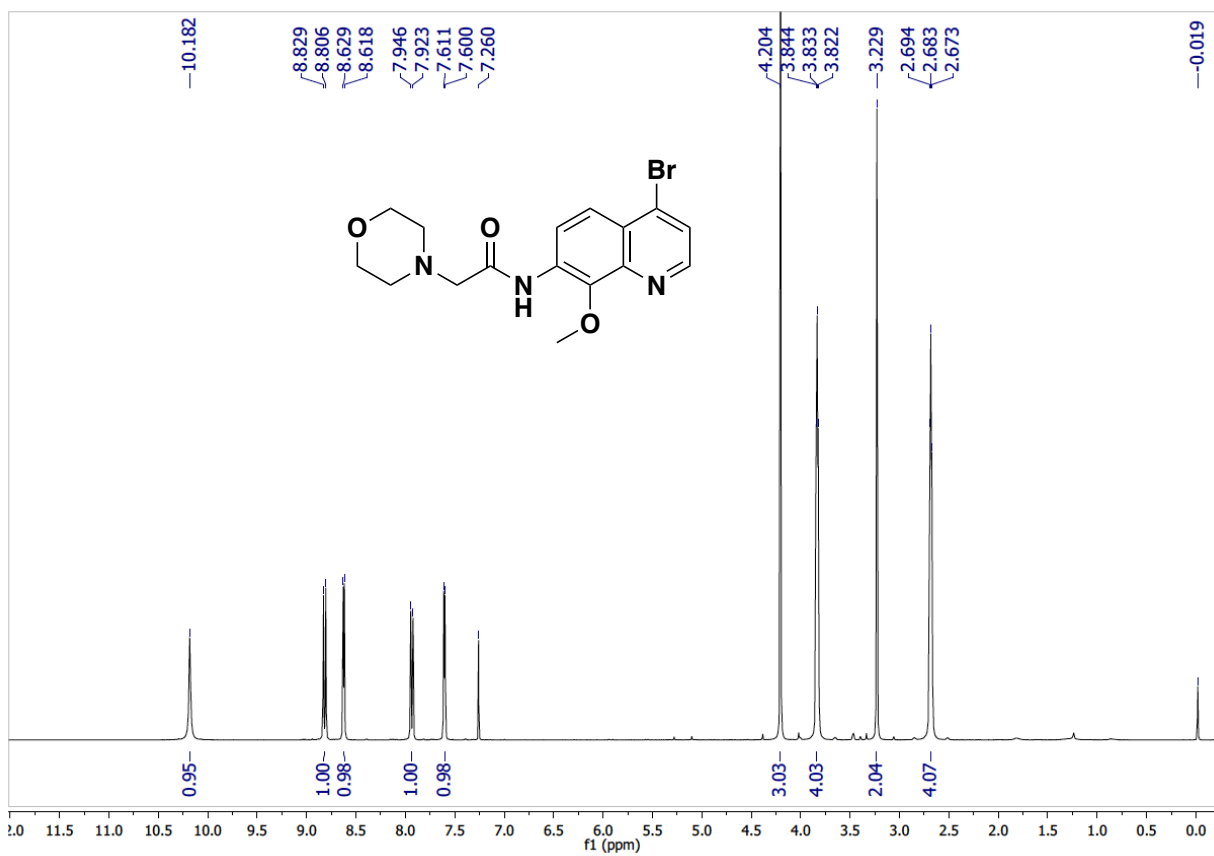

4-Bromo-8-methoxy-7-(2-(morpholin-4-yl)acetamido)quinoline (9) in CDCl<sub>3</sub>

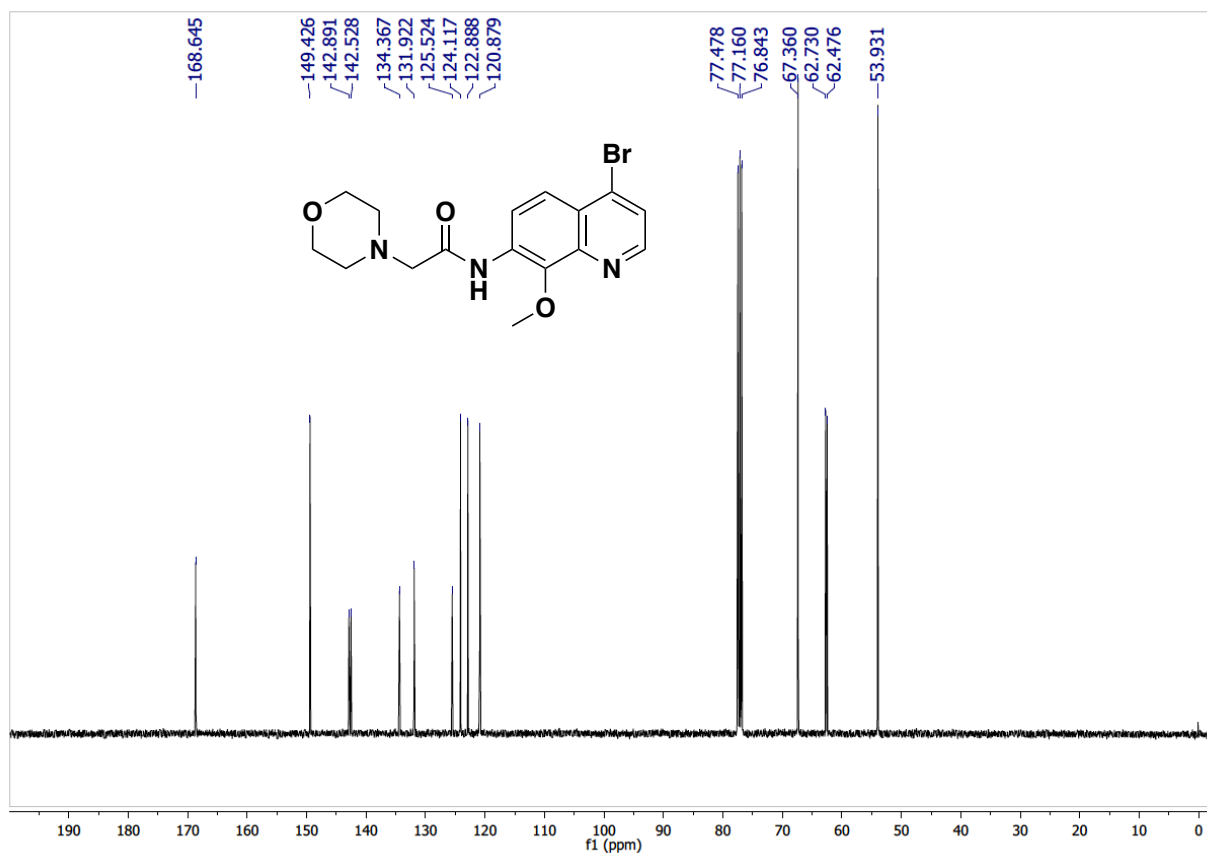

4-Bromo-8-methoxy-7-(2-(morpholin-4-yl)acetamido)quinoline (9)

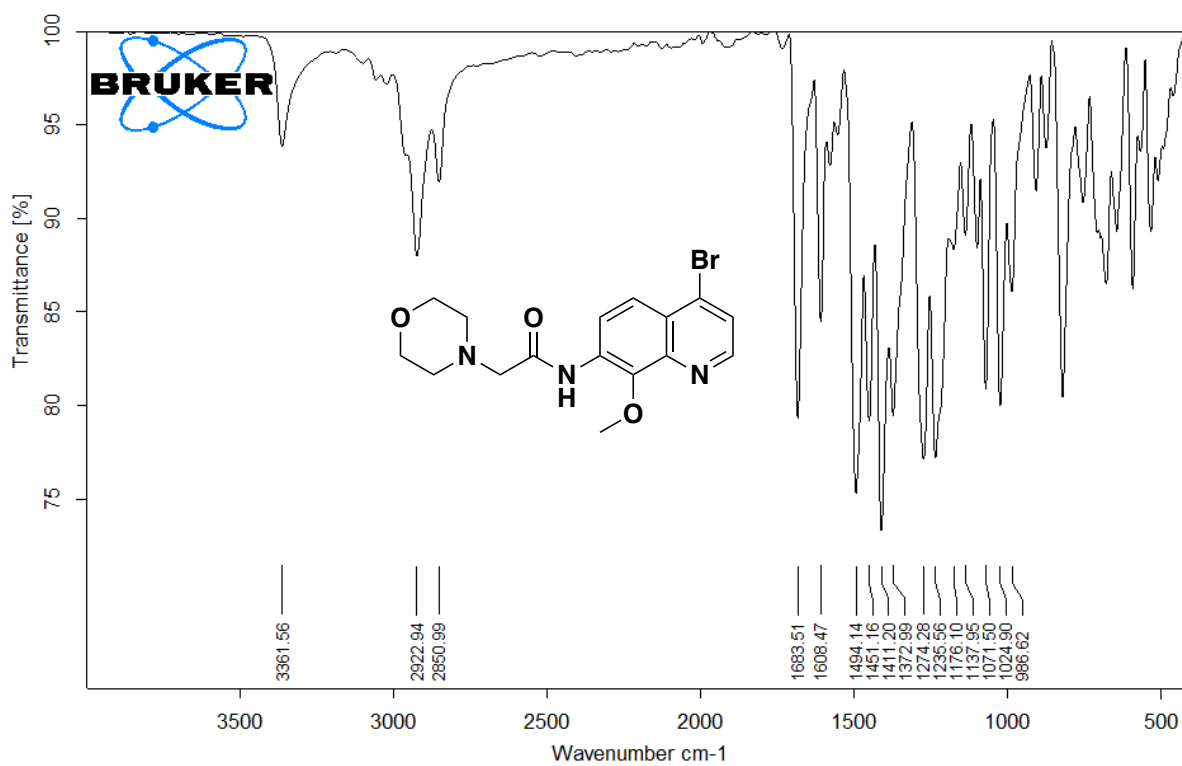



4-Bromo-8-methoxy-7-(3-(morpholin-4-yl)propanamido)quinoline (10) in CDCl<sub>3</sub>

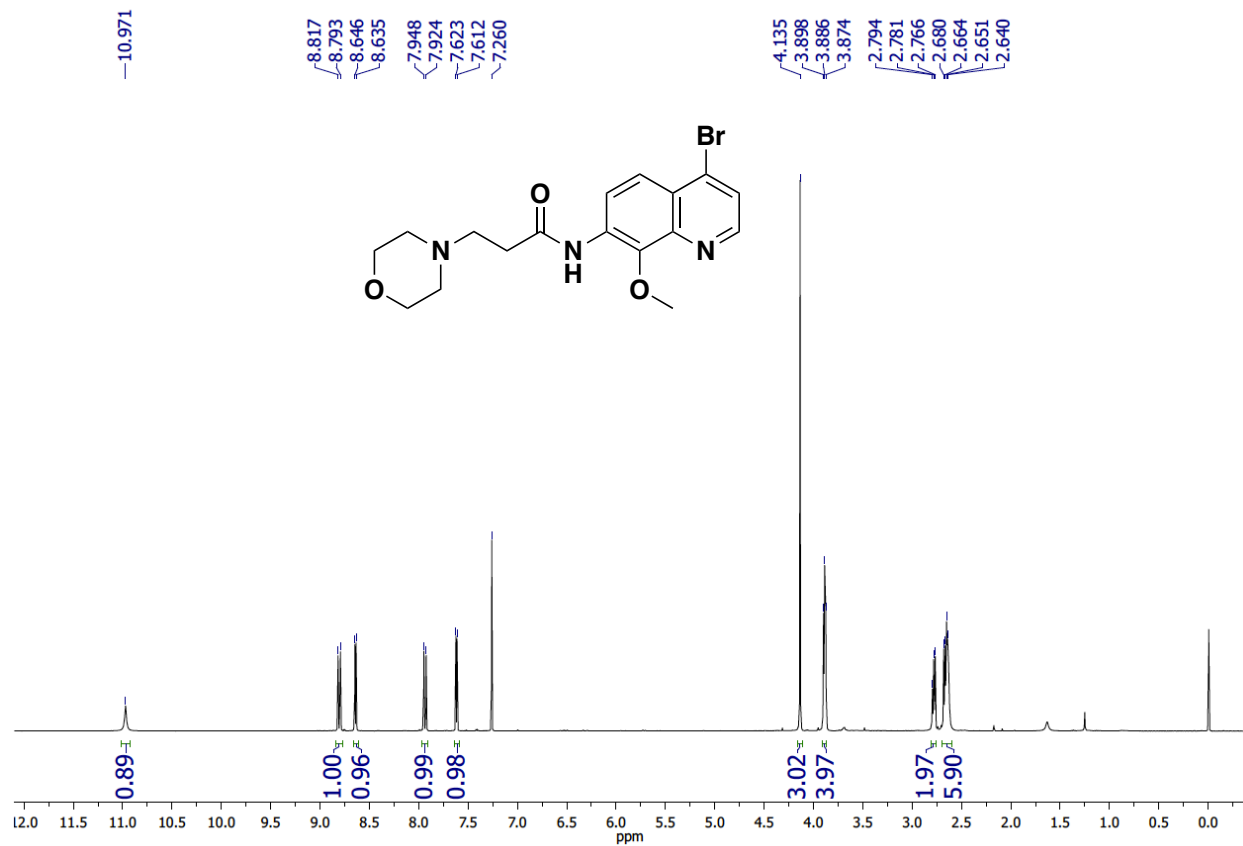

4-Bromo-8-methoxy-7-(3-(morpholin-4-yl)propanamido)quinoline (10)

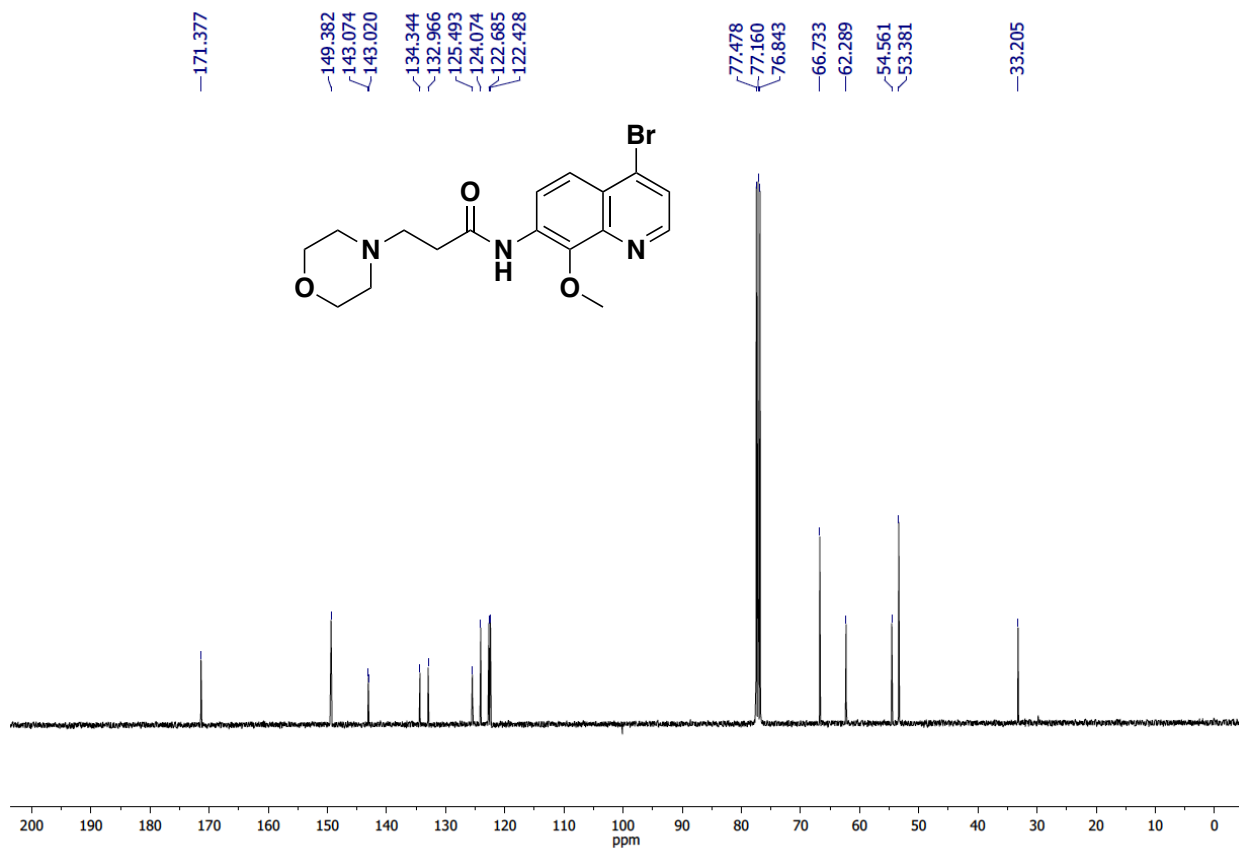

**4-Bromo-8-methoxy-7-(3-(morpholin-4-yl)propanamido)quinoline (10)**

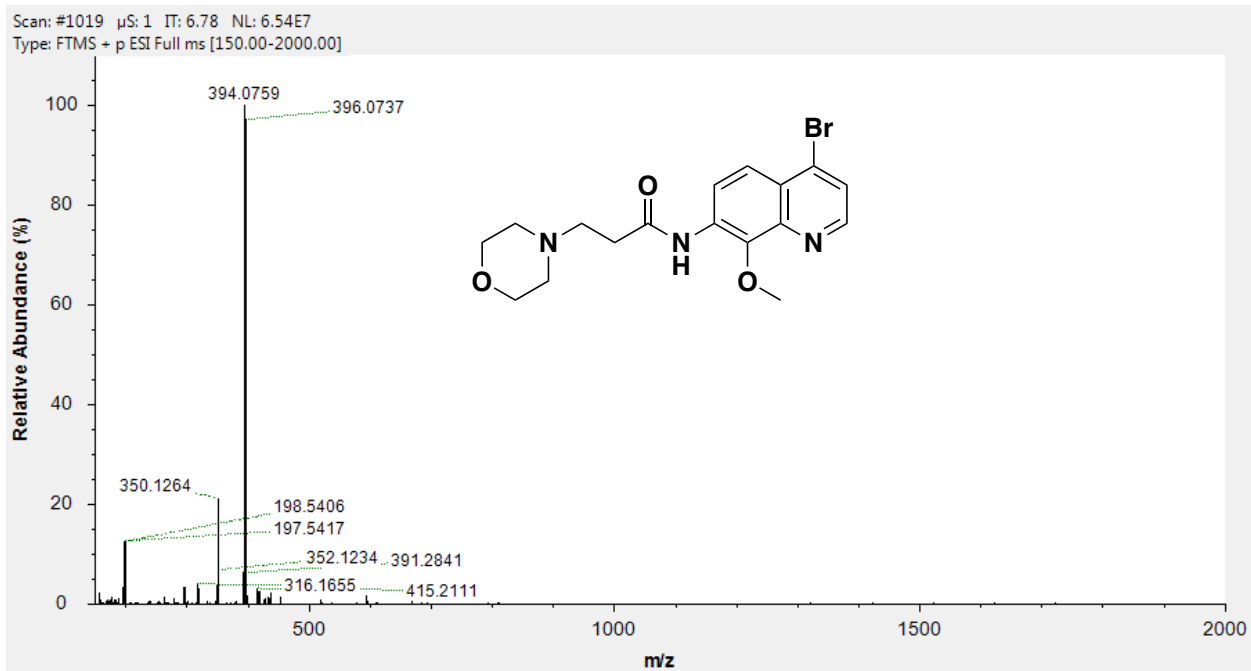

4-Bromo-8-methoxy-7-(3-(morpholin-4-yl)propanamido)quinoline (10)

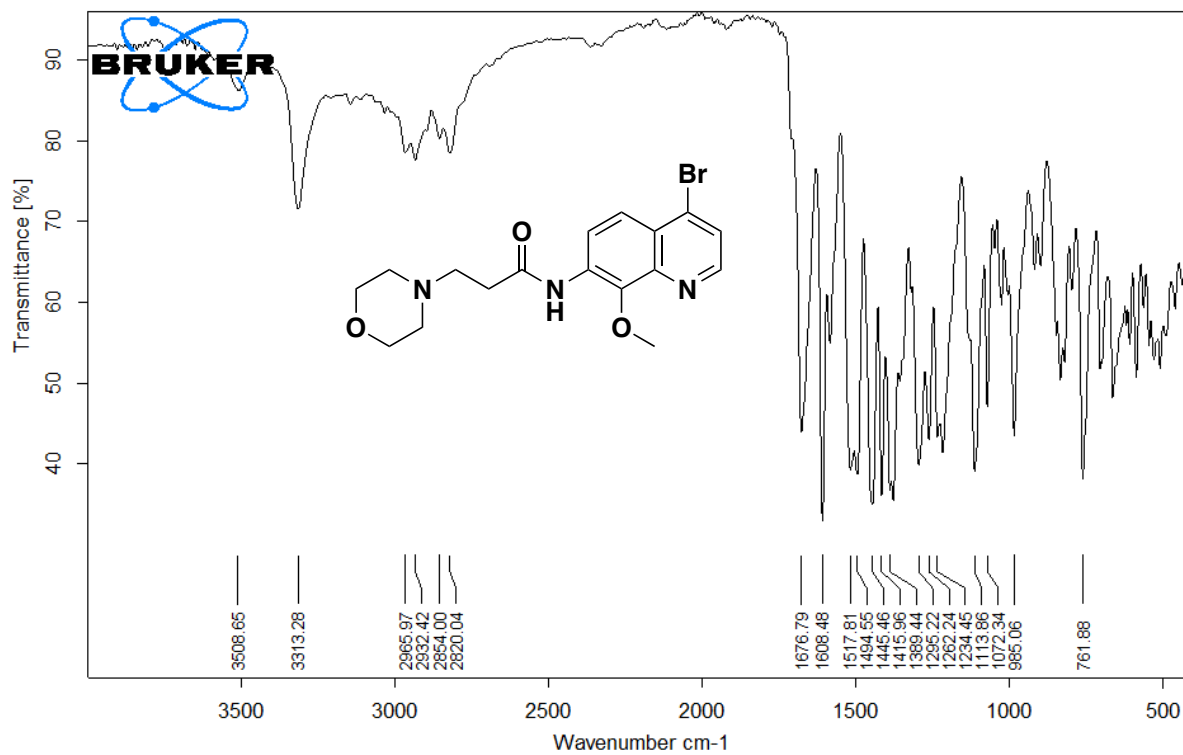

7-Acetamido-4-(phenyl)-8-methoxyquinoline (11) in CDCl<sub>3</sub>

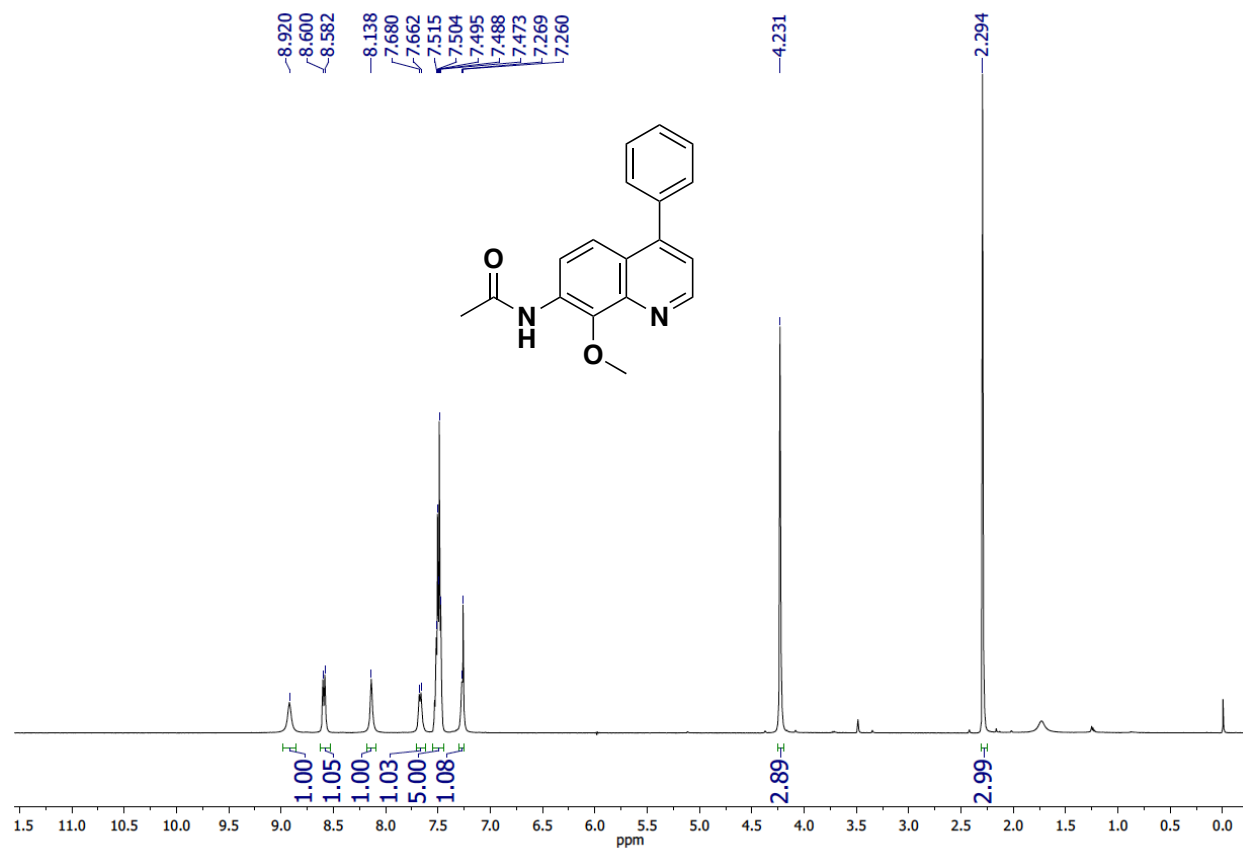

7-Acetamido-4-(phenyl)-8-methoxyquinoline (11) in CDCl<sub>3</sub>

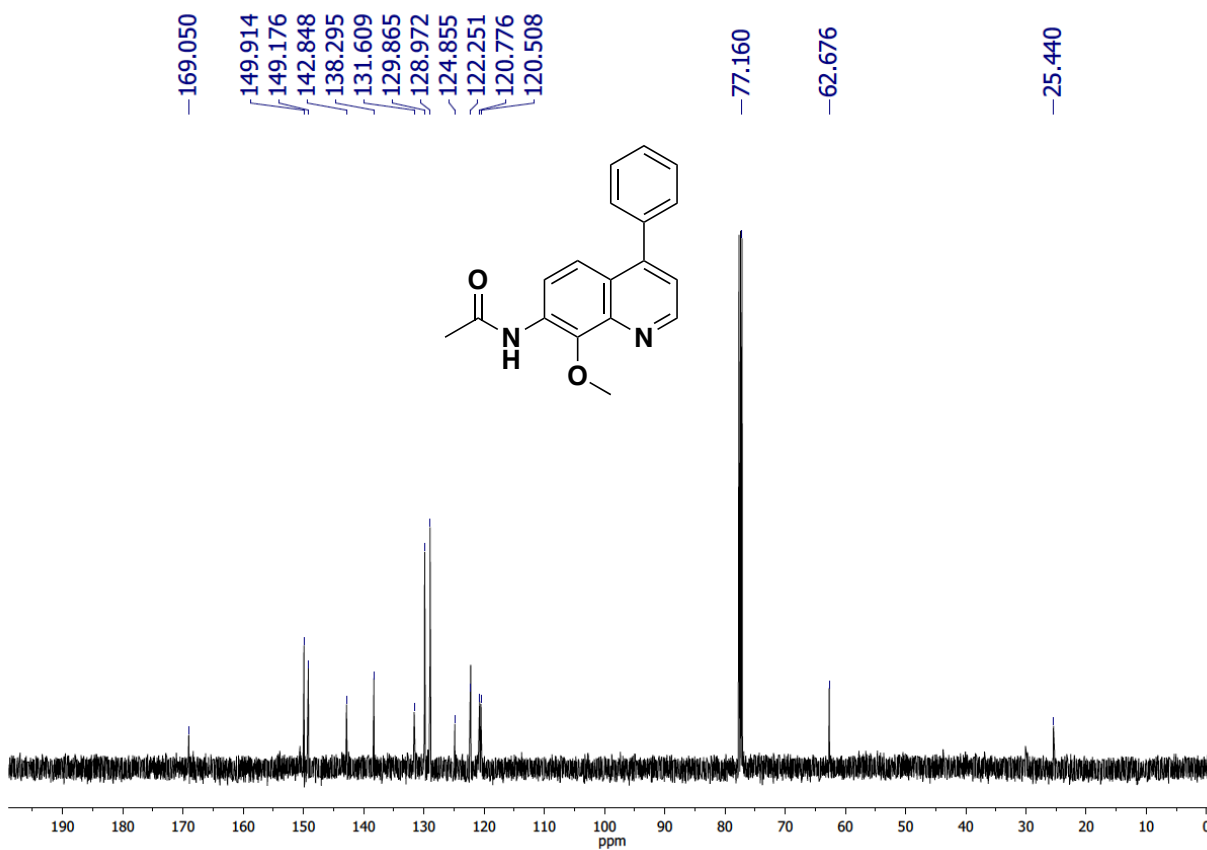

# 7-Acetamido-4-(phenyl)-8-methoxyquinoline (11)

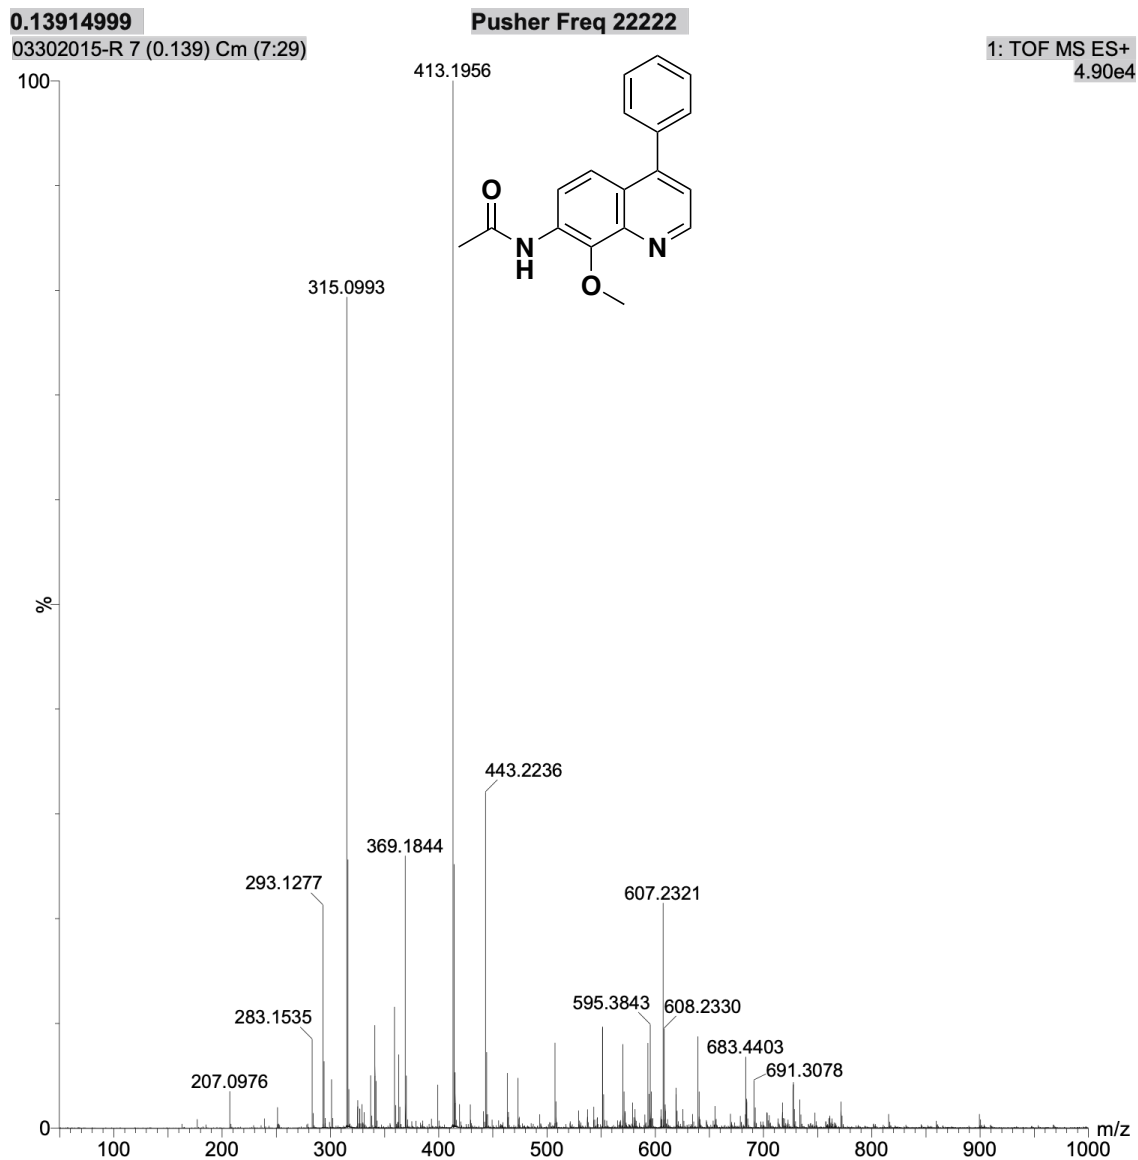

7-Acetamido-4-(phenyl)-8-methoxyquinoline (11)

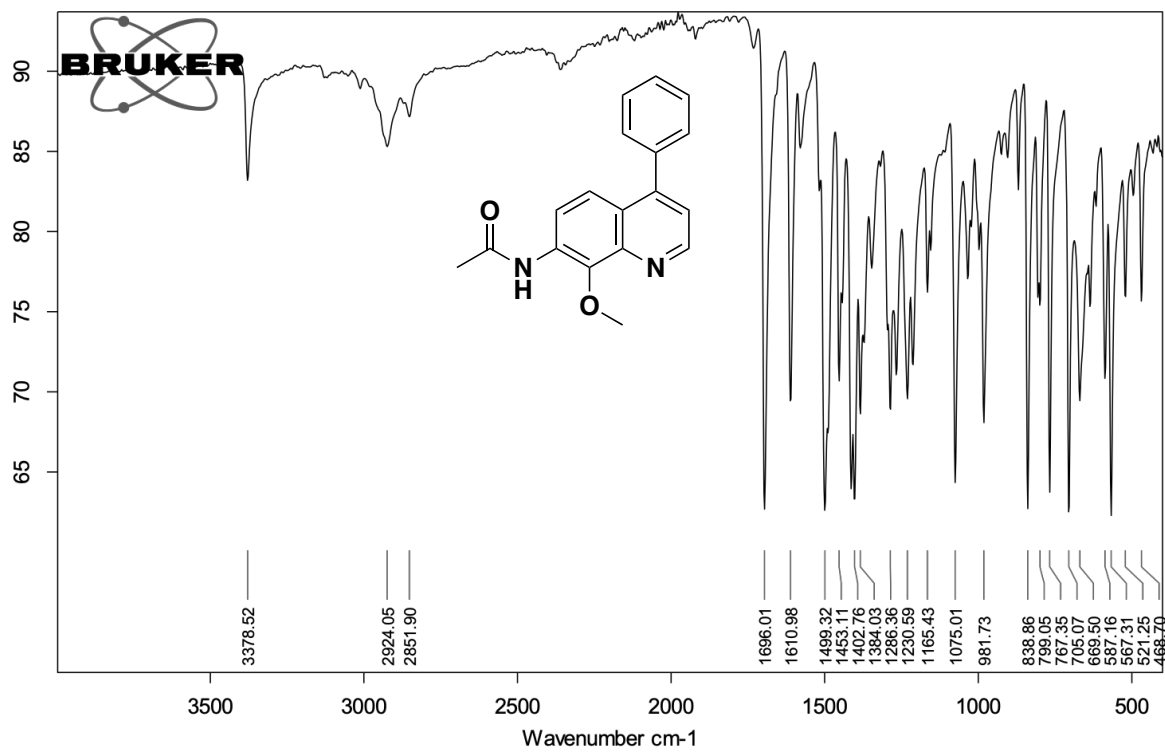



7-Acetamido-4-(3-fluorophenyl)-8-methoxyquinoline (12) in CDCl<sub>3</sub>

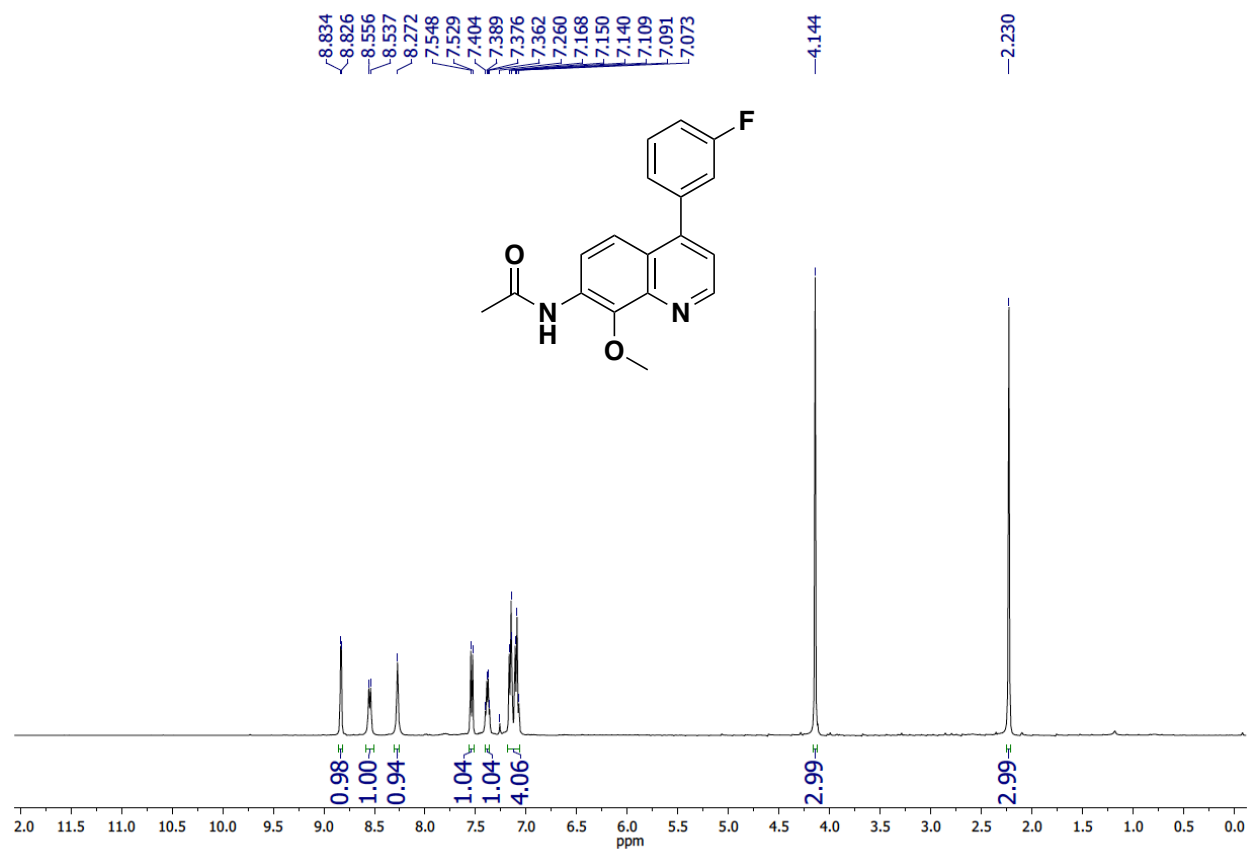

7-Acetamido-4-(3-fluorophenyl)-8-methoxyquinoline (12) in CDCl<sub>3</sub>

168.785  
163.542  
161.574  
149.297  
147.100  
142.639  
142.392  
139.837  
131.314  
130.084  
125.157  
123.932  
121.194  
120.509  
120.123  
116.462  
116.287  
115.396  
115.231  
77.416  
77.160  
76.905  
62.166  
24.842

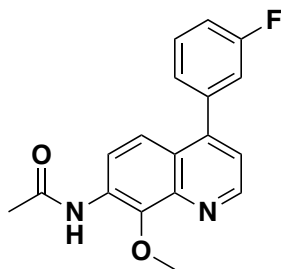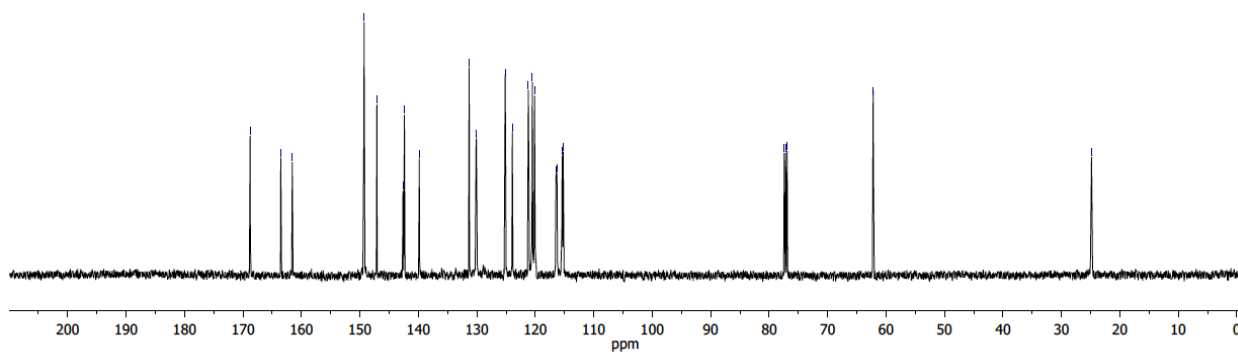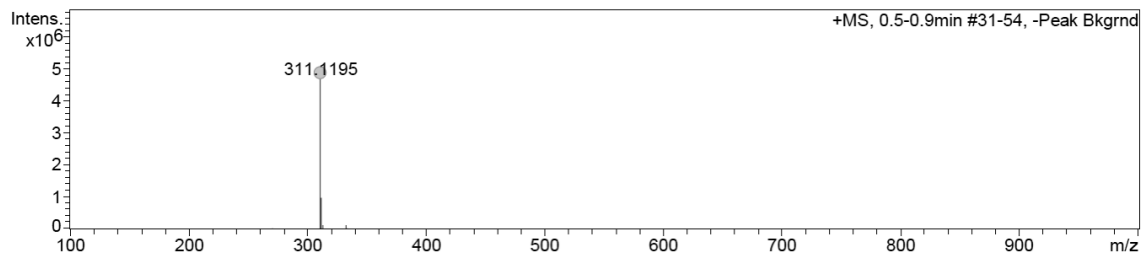

7-Acetamido-4-(3-fluorophenyl)-8-methoxyquinoline (12)

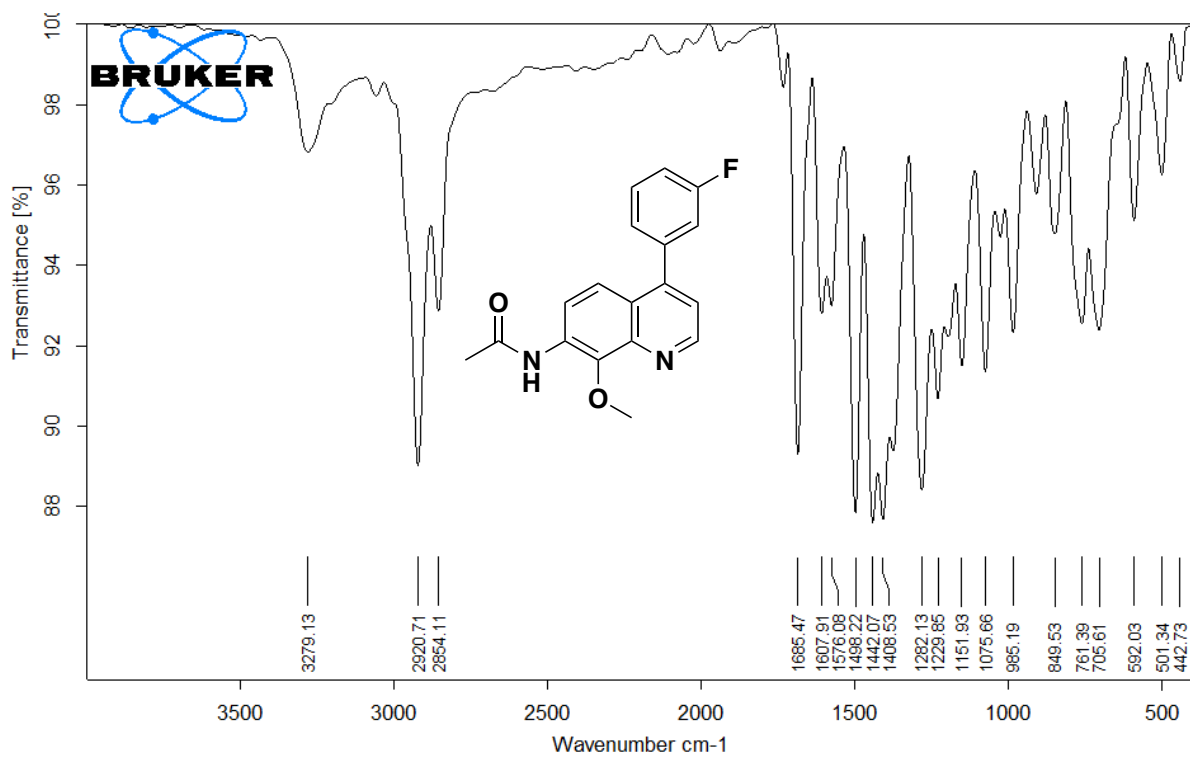

7-Acetamido-4-(4-fluorophenyl)-8-methoxyquinoline (13) in CDCl<sub>3</sub>

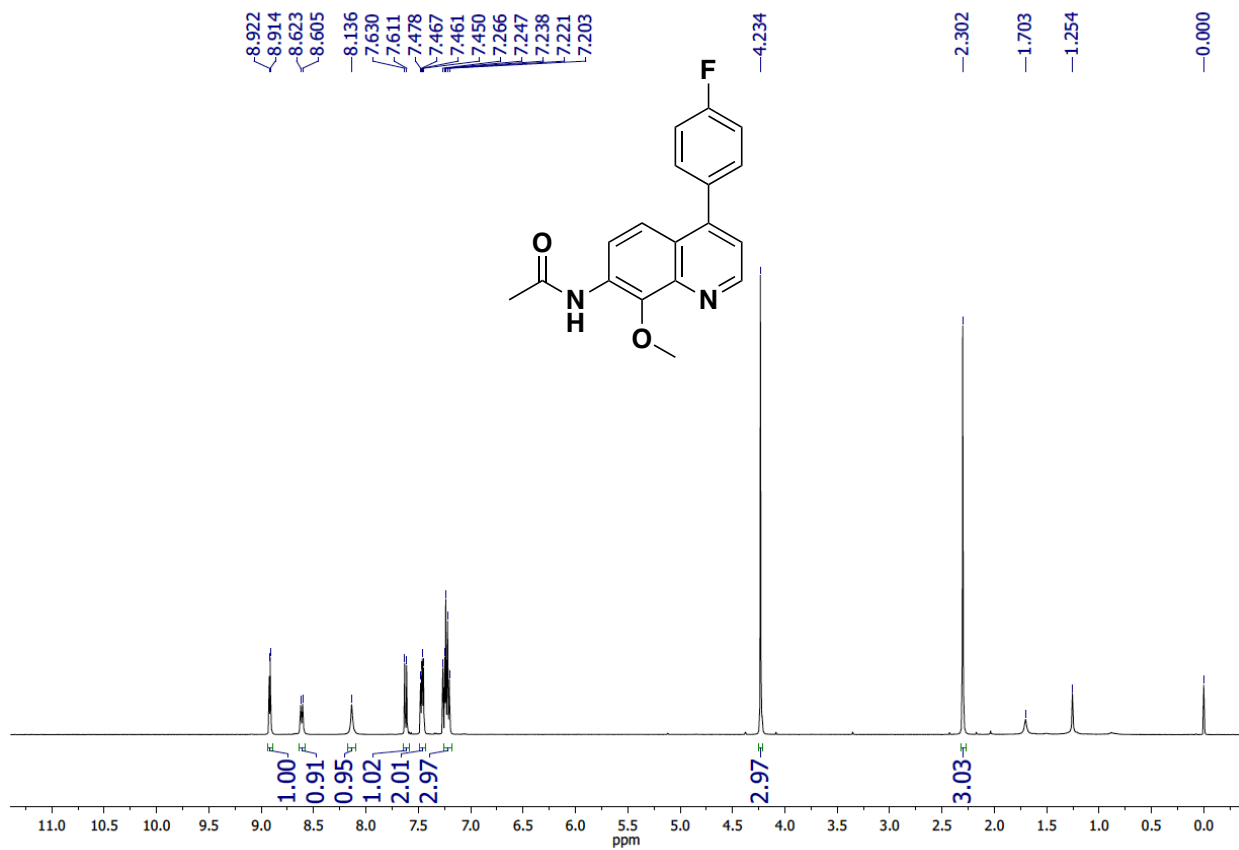

7-Acetamido-4-(4-fluorophenyl)-8-methoxyquinoline (13) in CDCl<sub>3</sub>

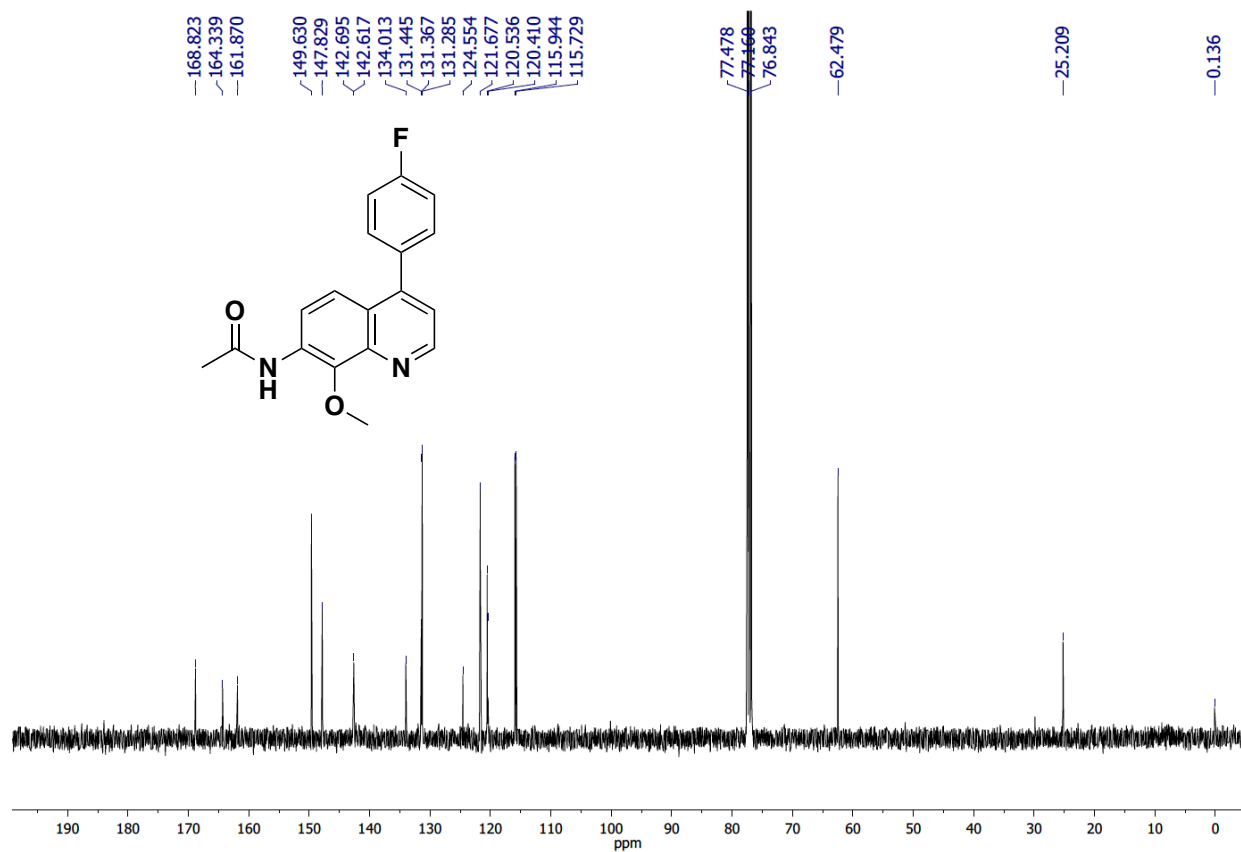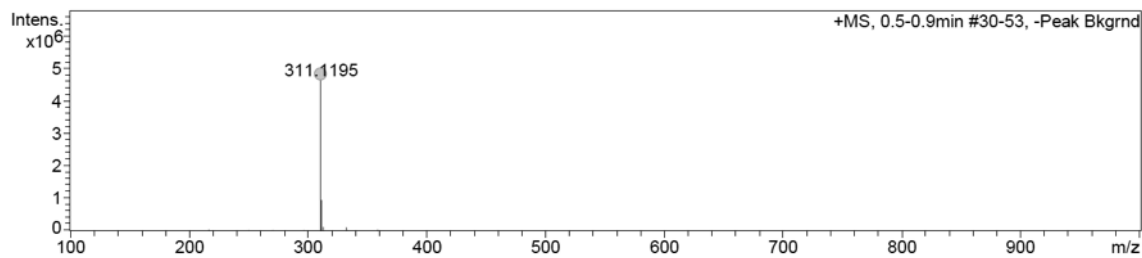

7-Acetamido-4-(4-fluorophenyl)-8-methoxyquinoline (13)

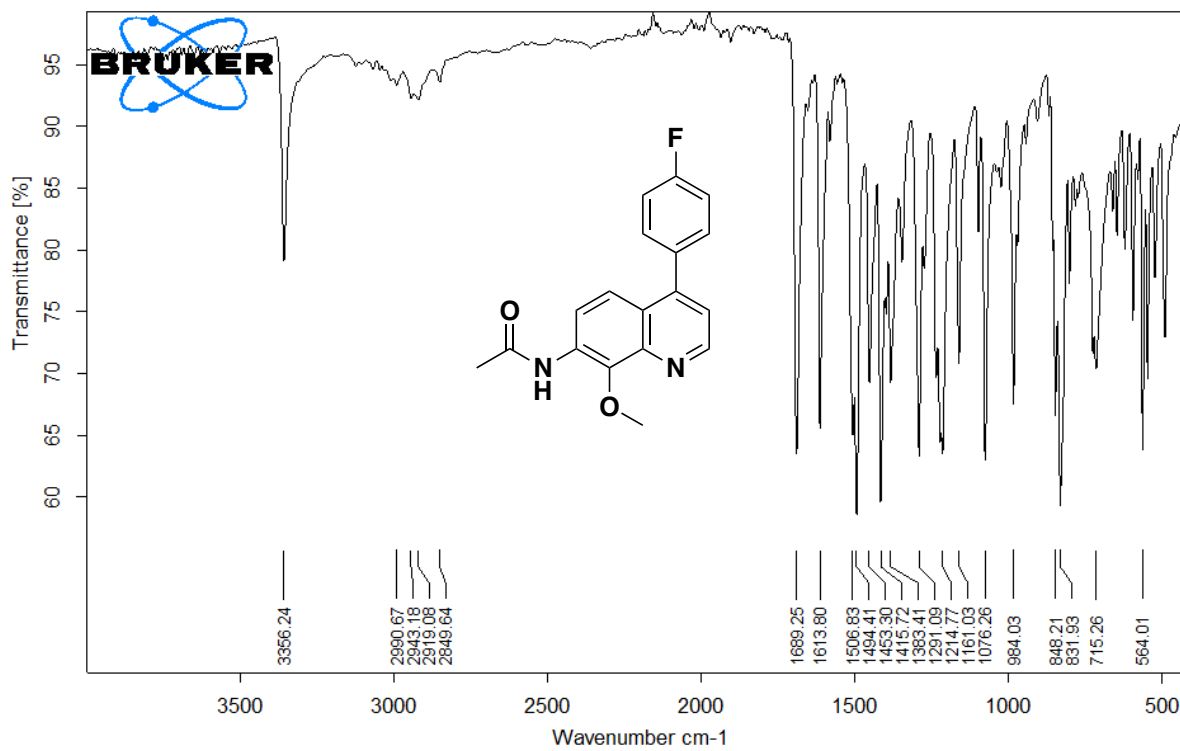

7-Acetamido-4-((3-trifluoromethyl)phenyl)-8-methoxyquinoline (14) in CDCl<sub>3</sub>

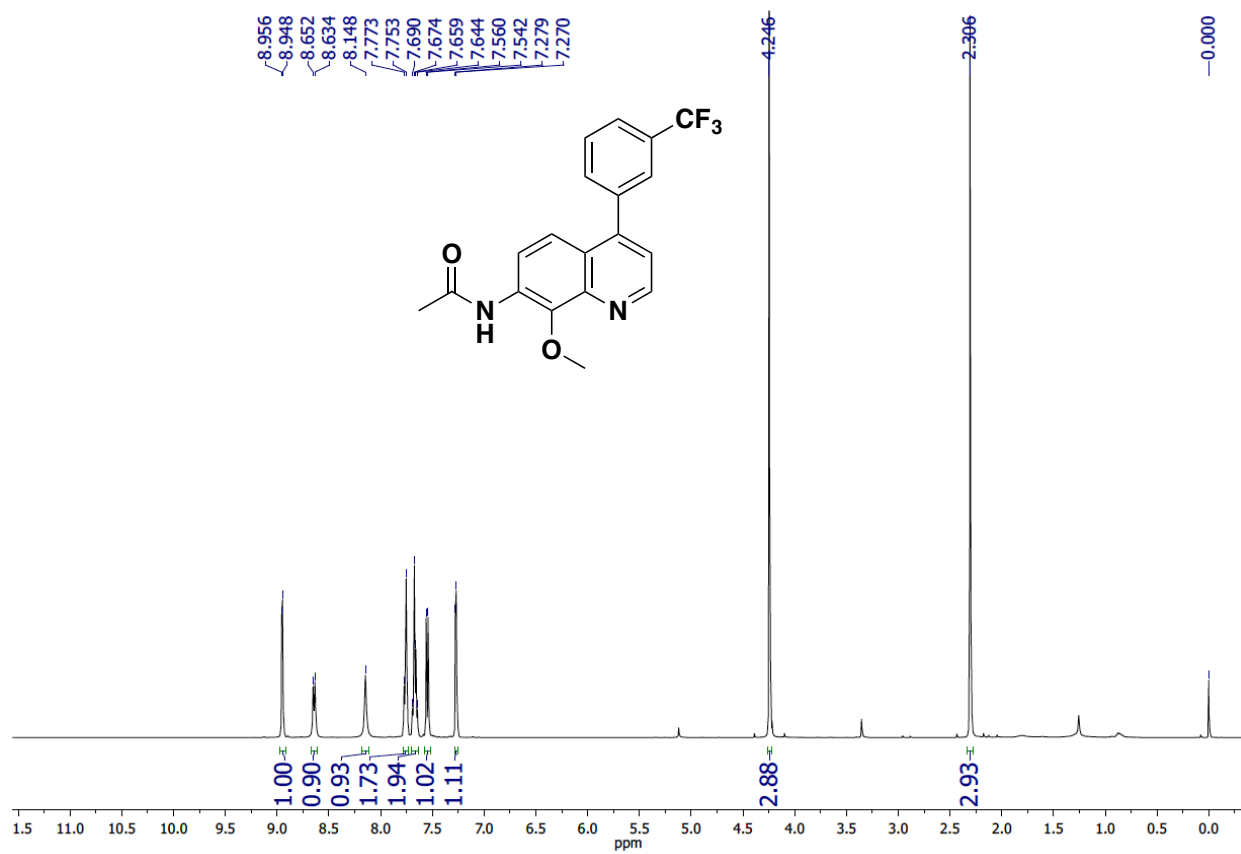

7-Acetamido-4-((3-trifluoromethyl)phenyl)-8-methoxyquinoline (14) in CDCl<sub>3</sub>

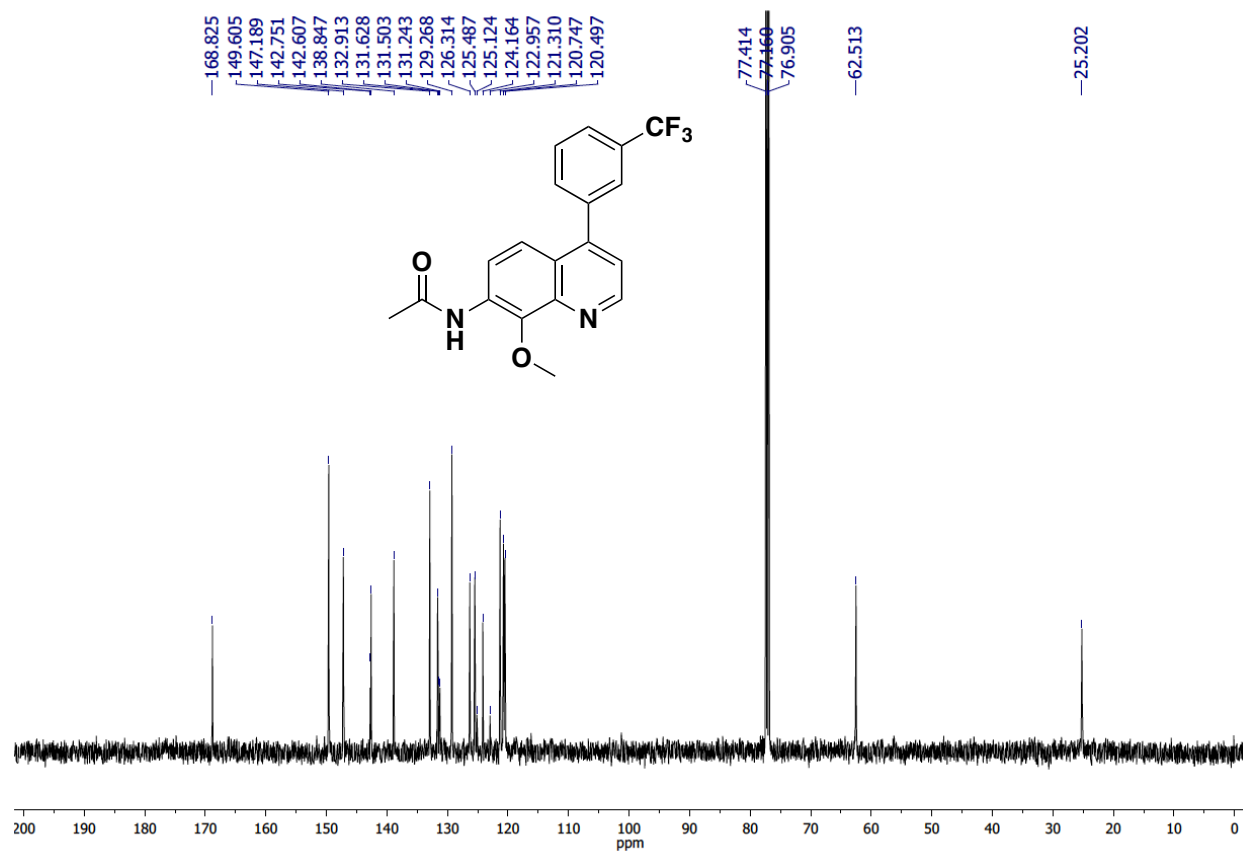



7-Acetamido-4-((3-trifluoromethyl)phenyl)-8-methoxyquinoline (14)

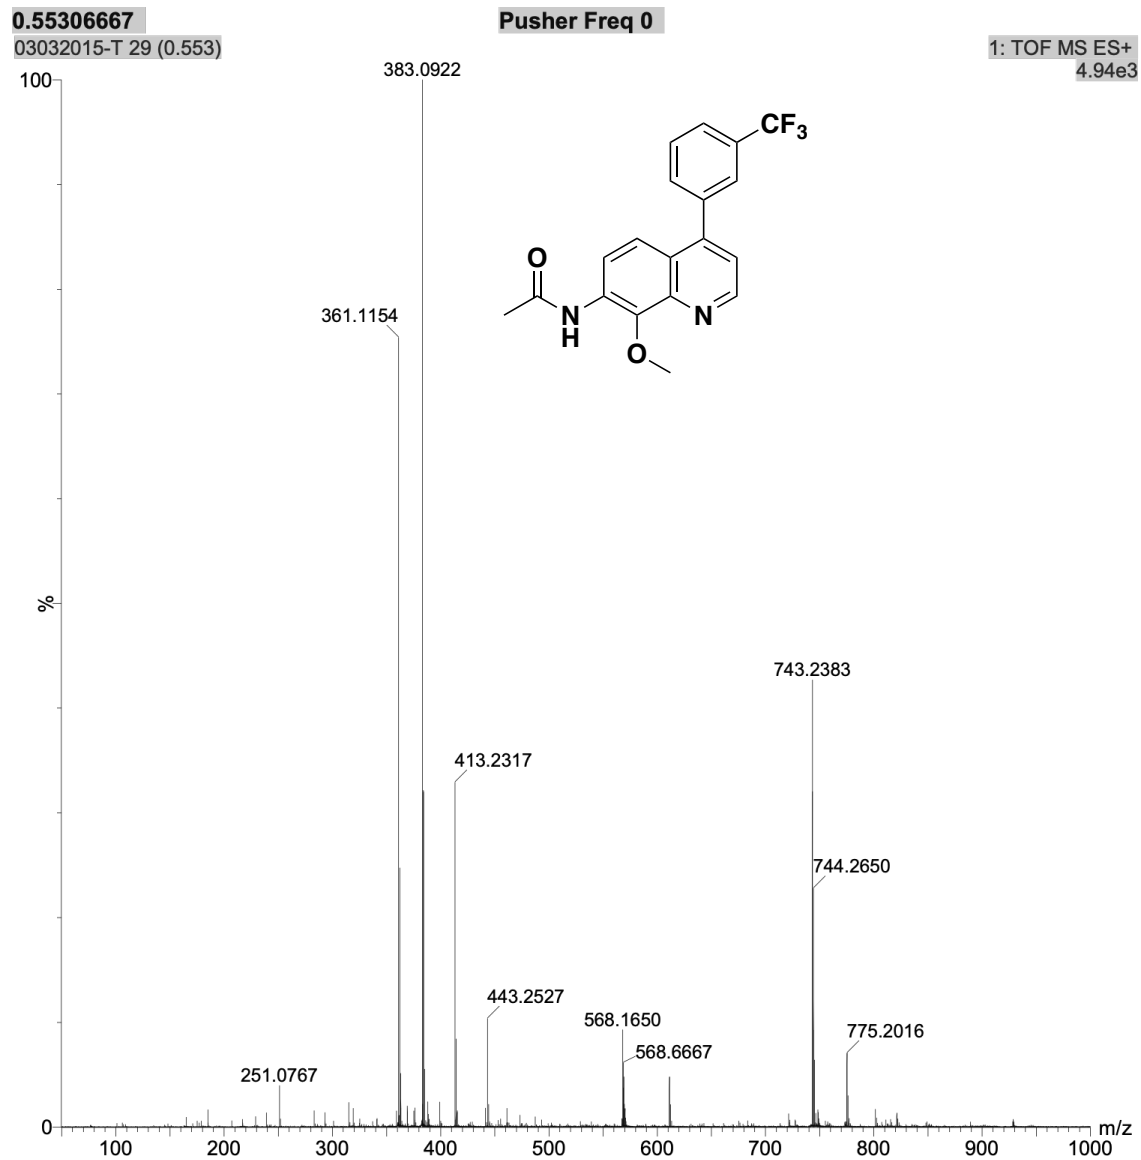

7-Acetamido-4-((3-trifluoromethyl)phenyl)-8-methoxyquinoline (14)

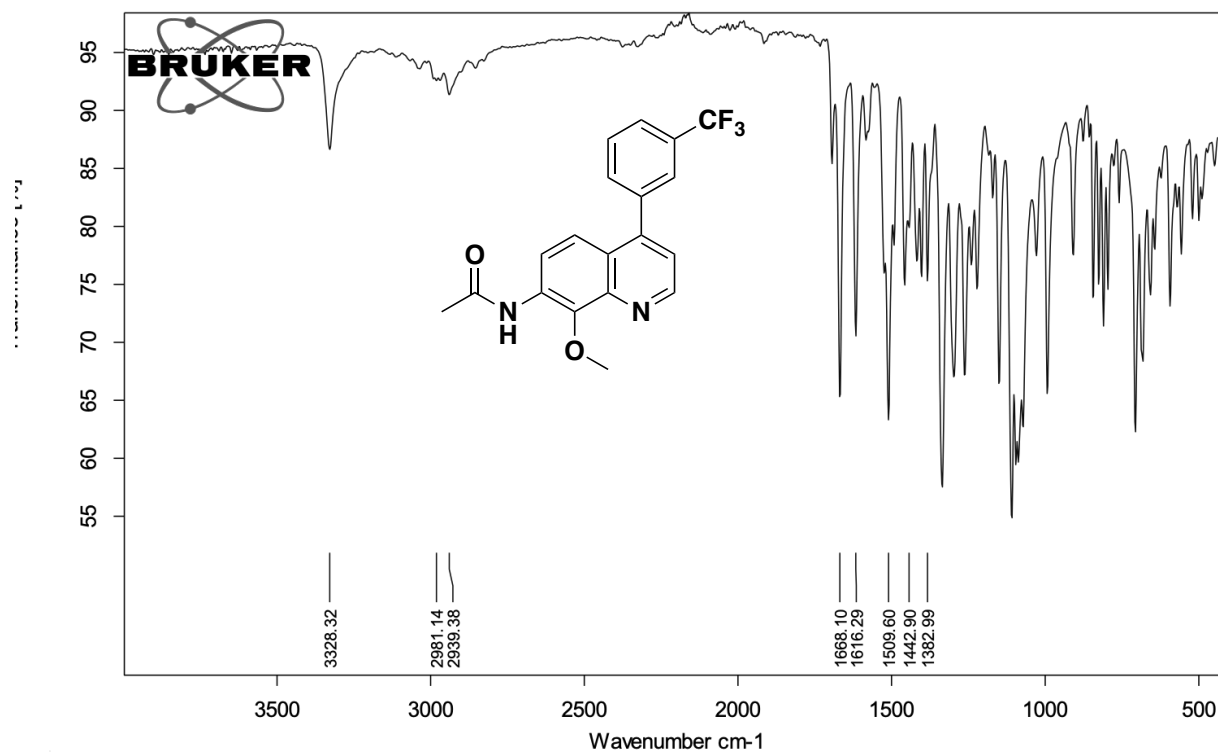

7-Acetamido-4-((4-trifluoromethyl)phenyl)-8-methoxyquinoline (15) in CDCl<sub>3</sub>

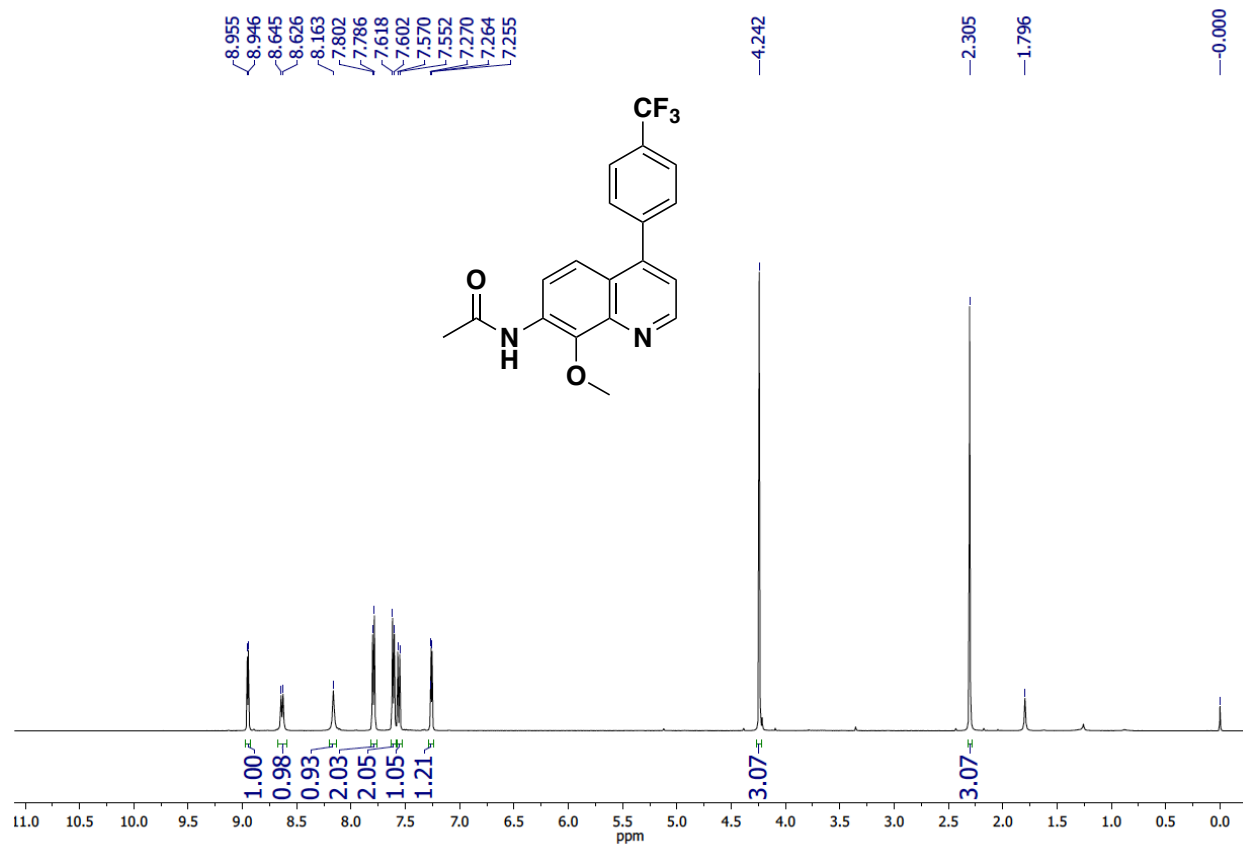

7-Acetamido-4-((4-trifluoromethyl)phenyl)-8-methoxyquinoline (15) in CDCl<sub>3</sub>

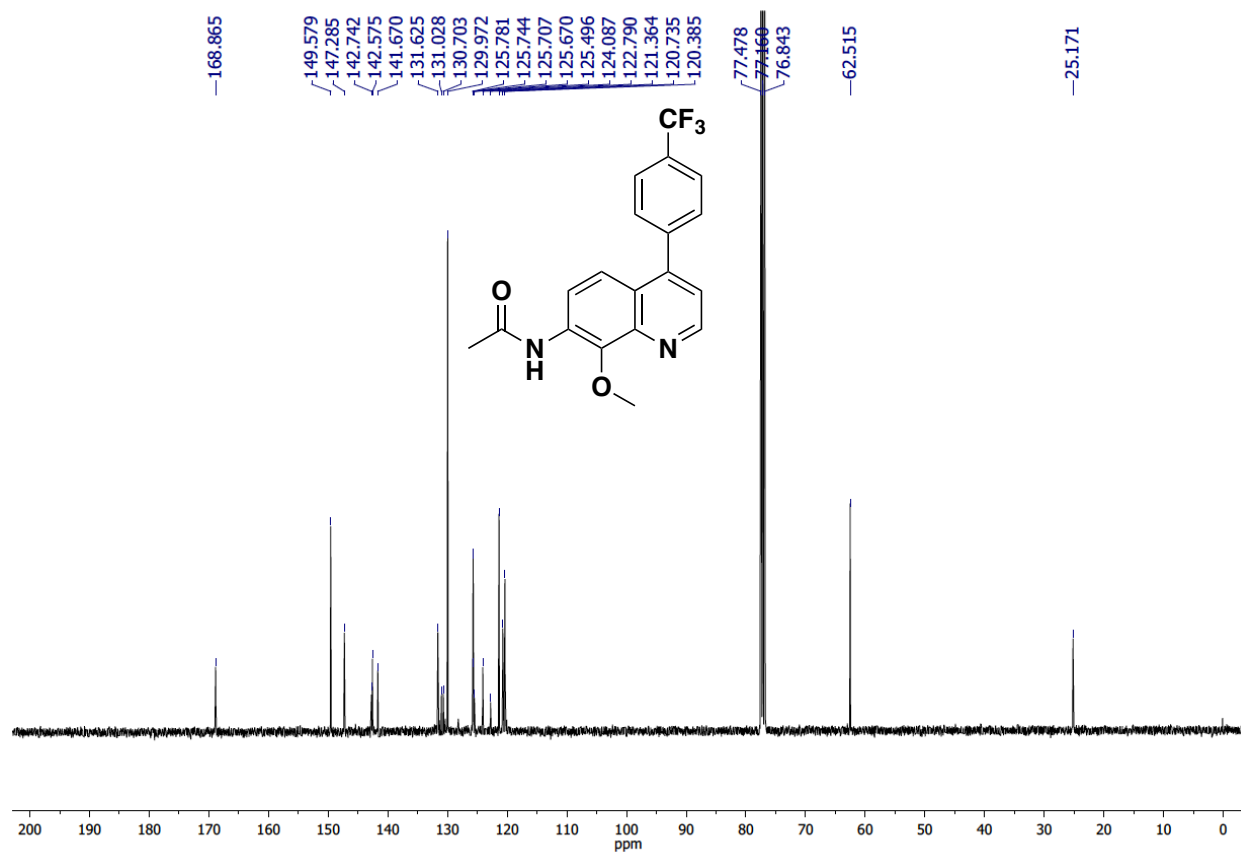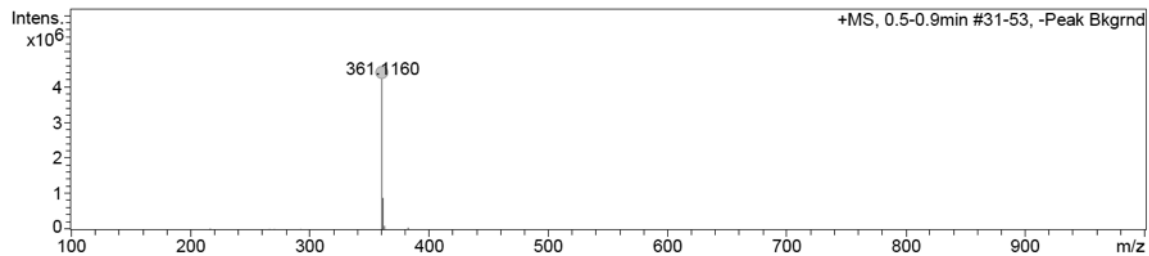

7-Acetamido-4-((4-trifluoromethyl)phenyl)-8-methoxyquinoline (15)

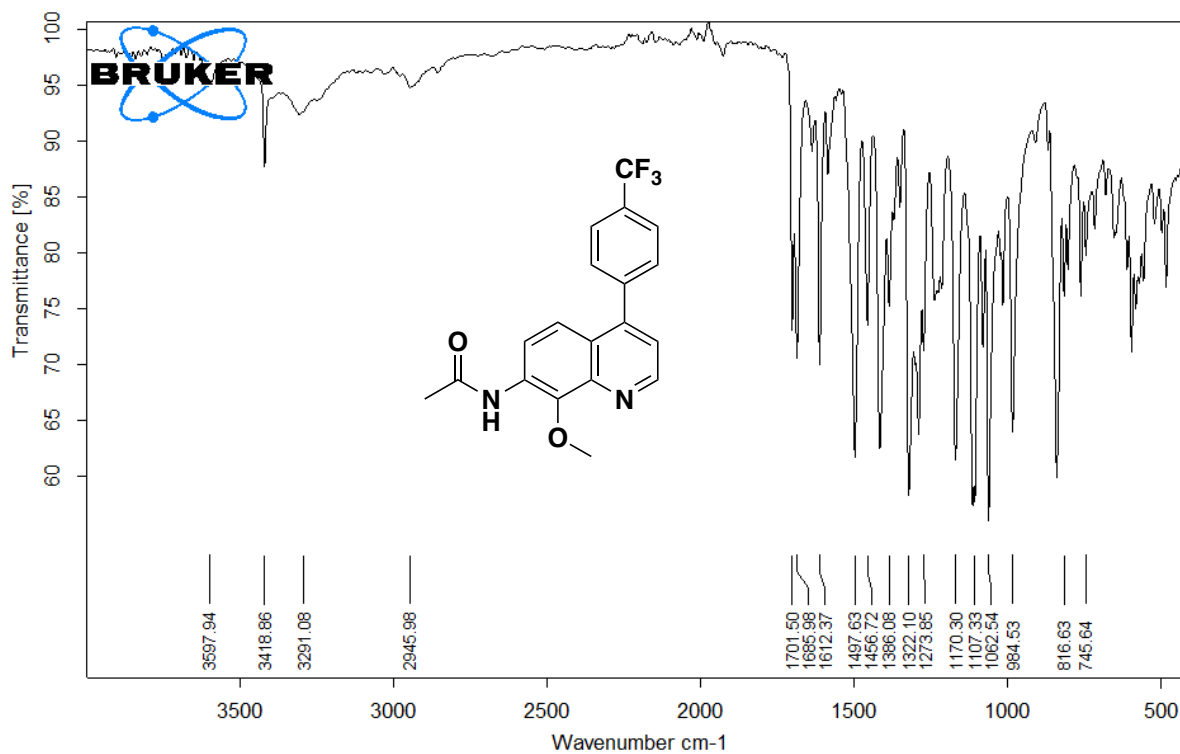

7-Acetamido-4-(3-methoxyphenyl)-8-methoxyquinoline (16) in CDCl<sub>3</sub>

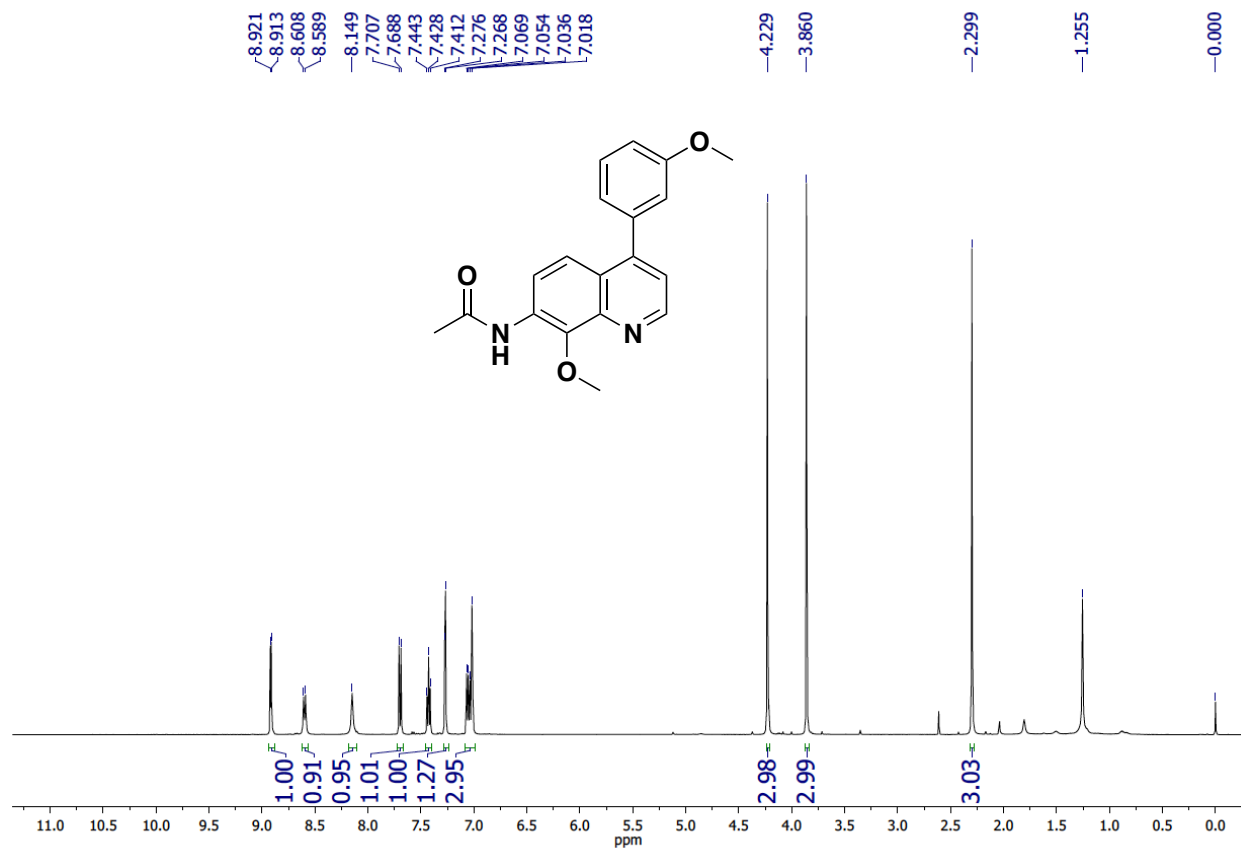

7-Acetamido-4-(3-methoxyphenyl)-8-methoxyquinoline (16) in CDCl<sub>3</sub>

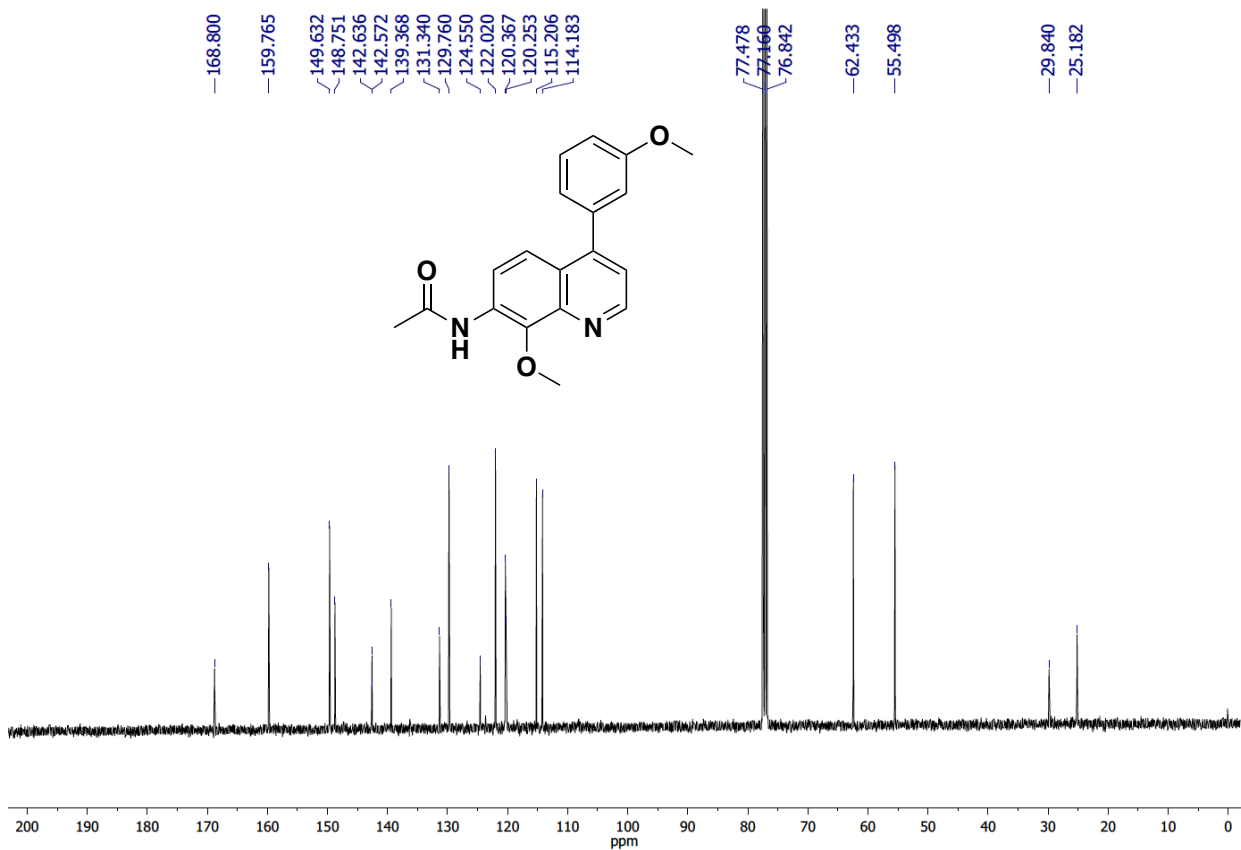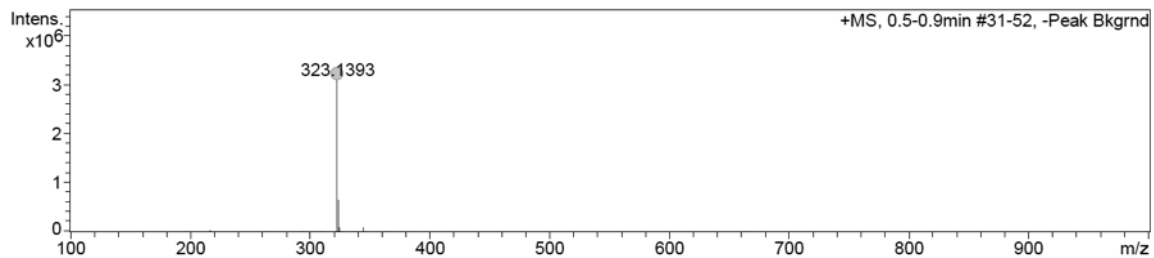

7-Acetamido-4-(3-methoxyphenyl)-8-methoxyquinoline (16)

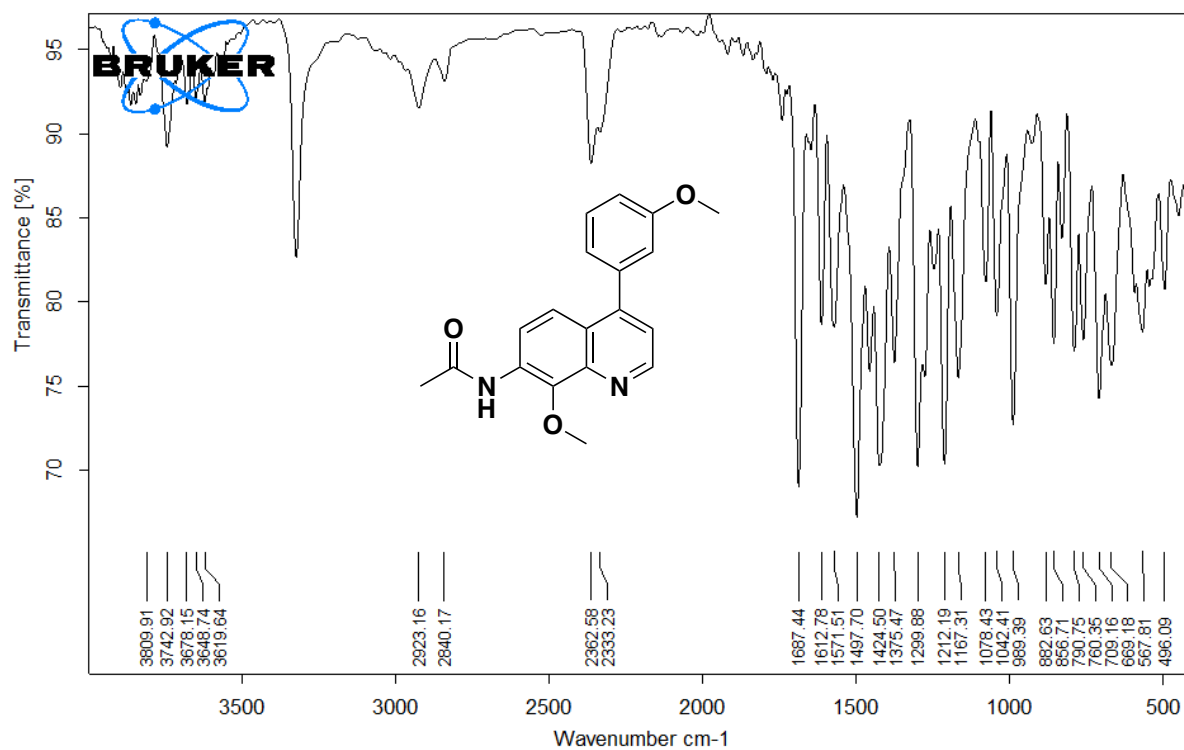



7-Acetamido-4-(2-acetamidophenyl)-8-methoxyquinoline (17) in DMSO-d<sub>6</sub>

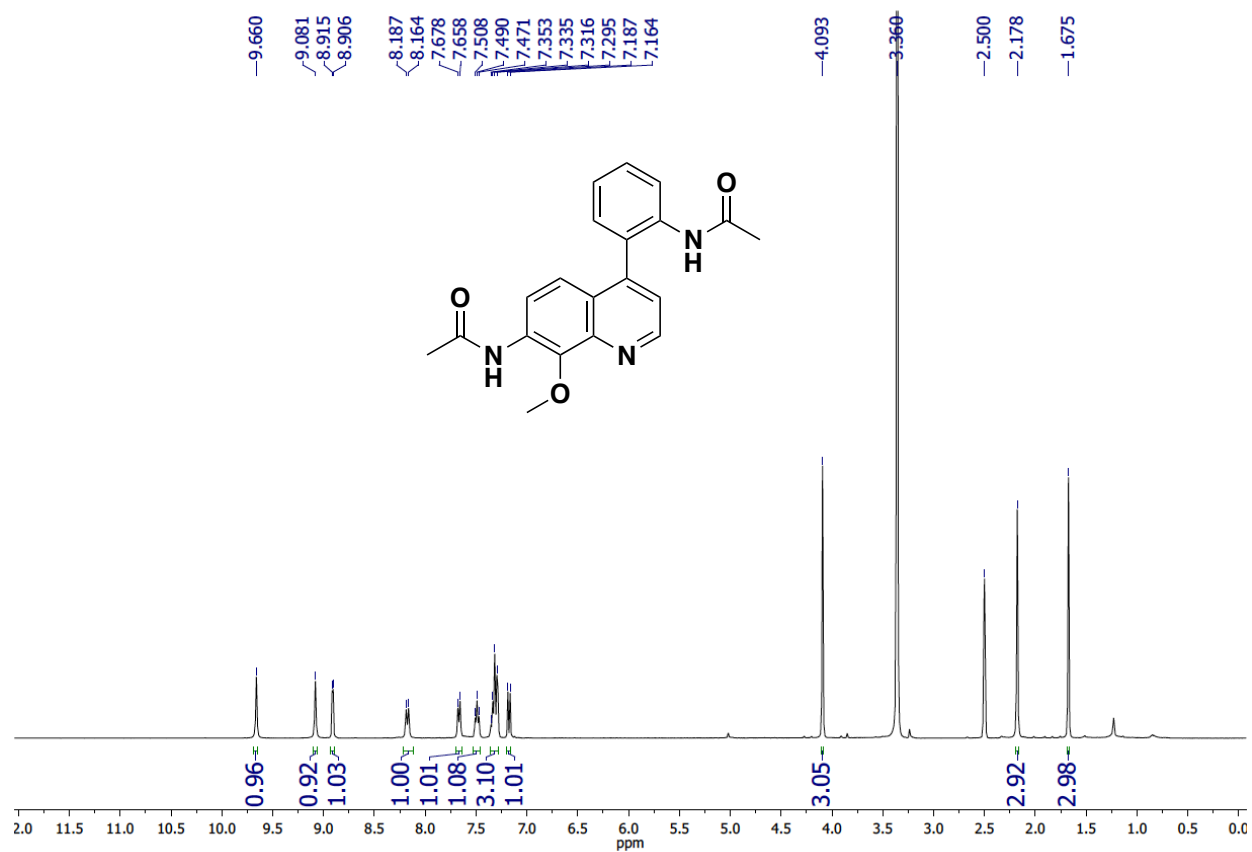

7-Acetamido-4-(2-acetamidophenyl)-8-methoxyquinoline (17) in DMSO-d<sub>6</sub>

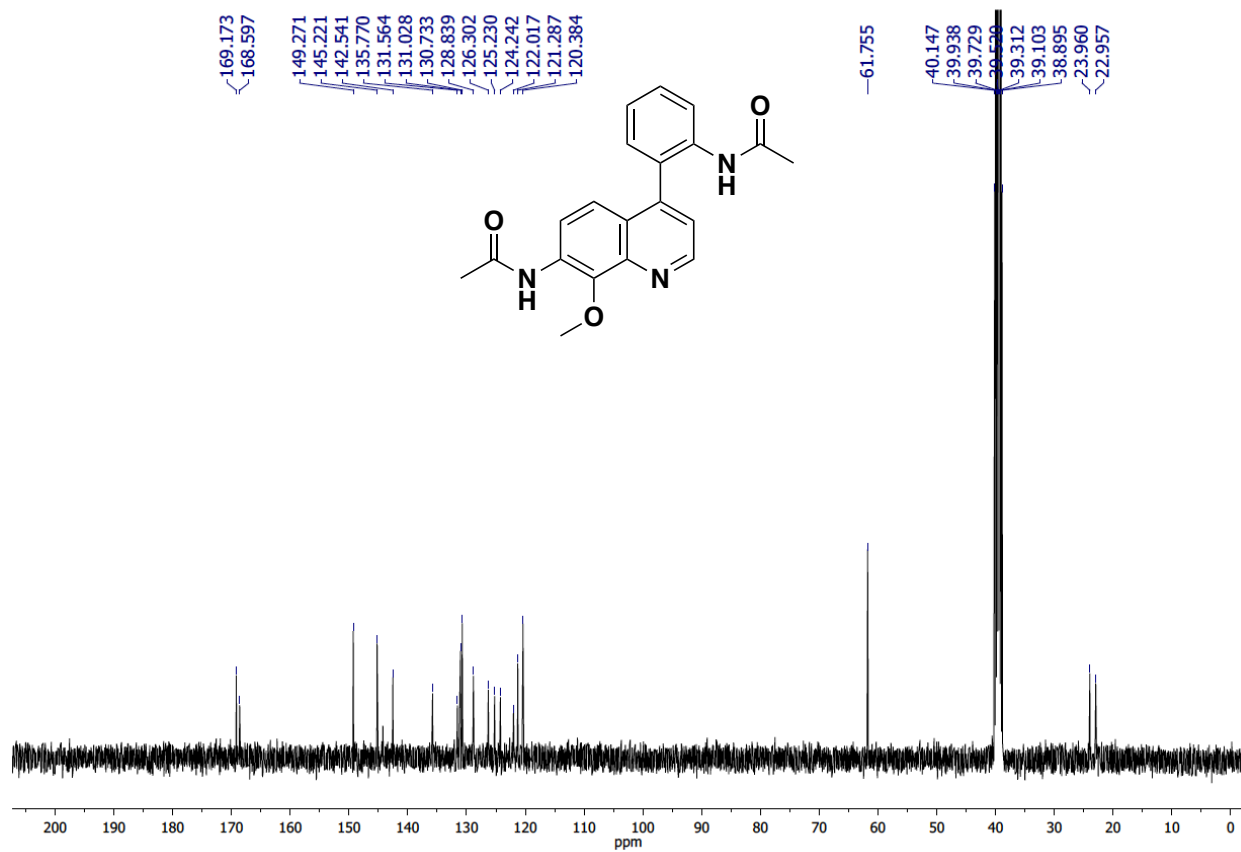

7-Acetamido-4-(2-acetamidophenyl)-8-methoxyquinoline (17)

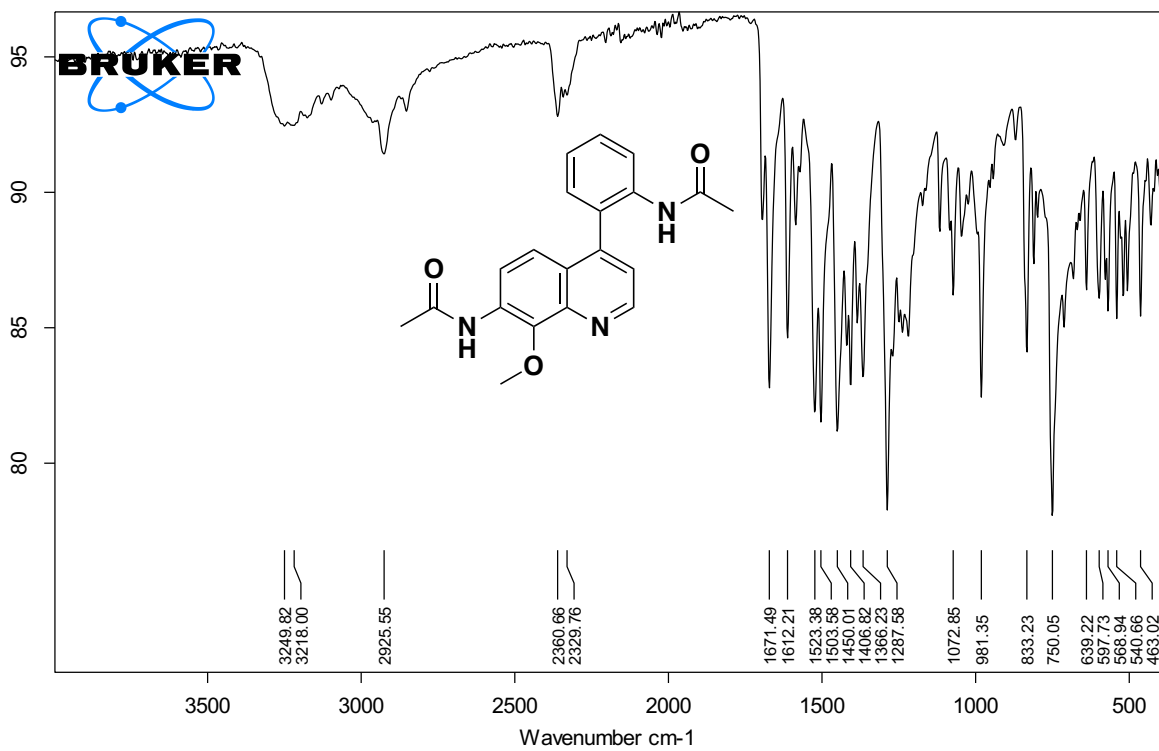

# 7-Acetamido-4-(2-acetamidophenyl)-8-methoxyquinoline (17)

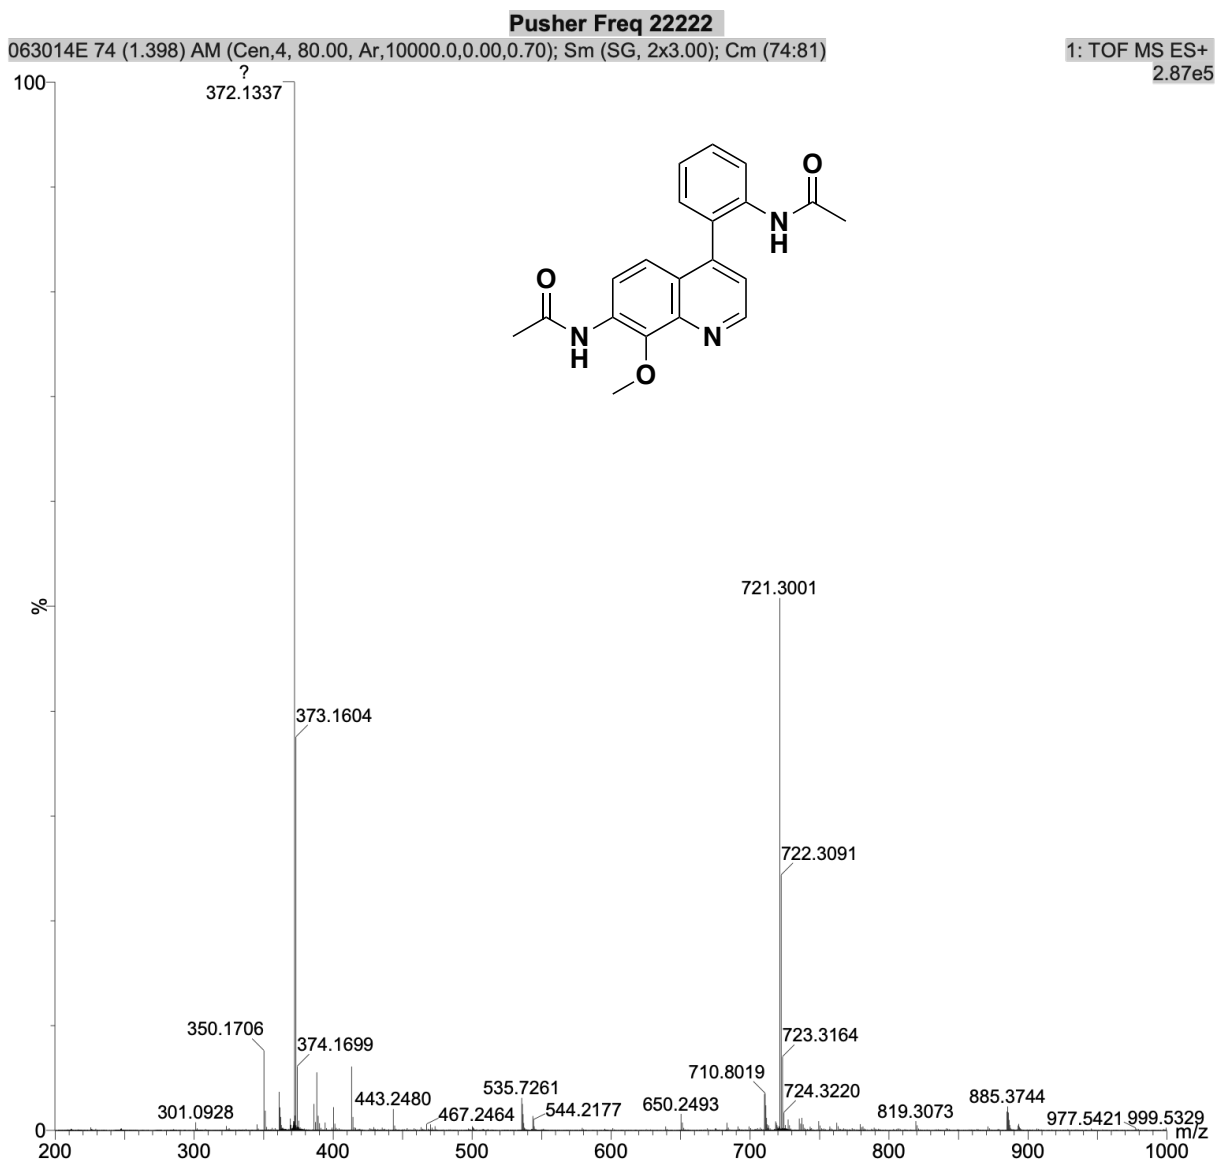

7-Acetamido-4-(4-acetamidophenyl)-8-methoxyquinoline (18) in DMSO

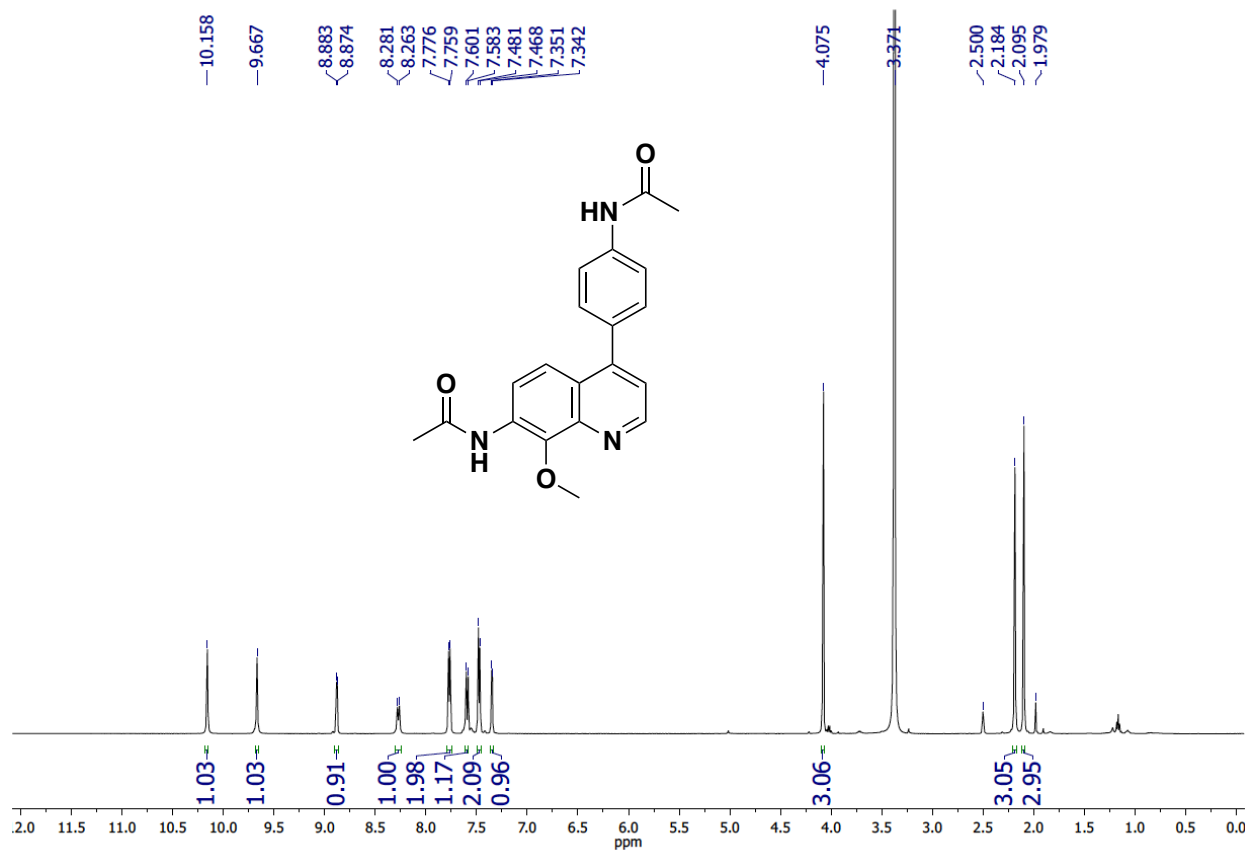

7-Acetamido-4-(4-acetamidophenyl)-8-methoxyquinoline (18) in DMSO

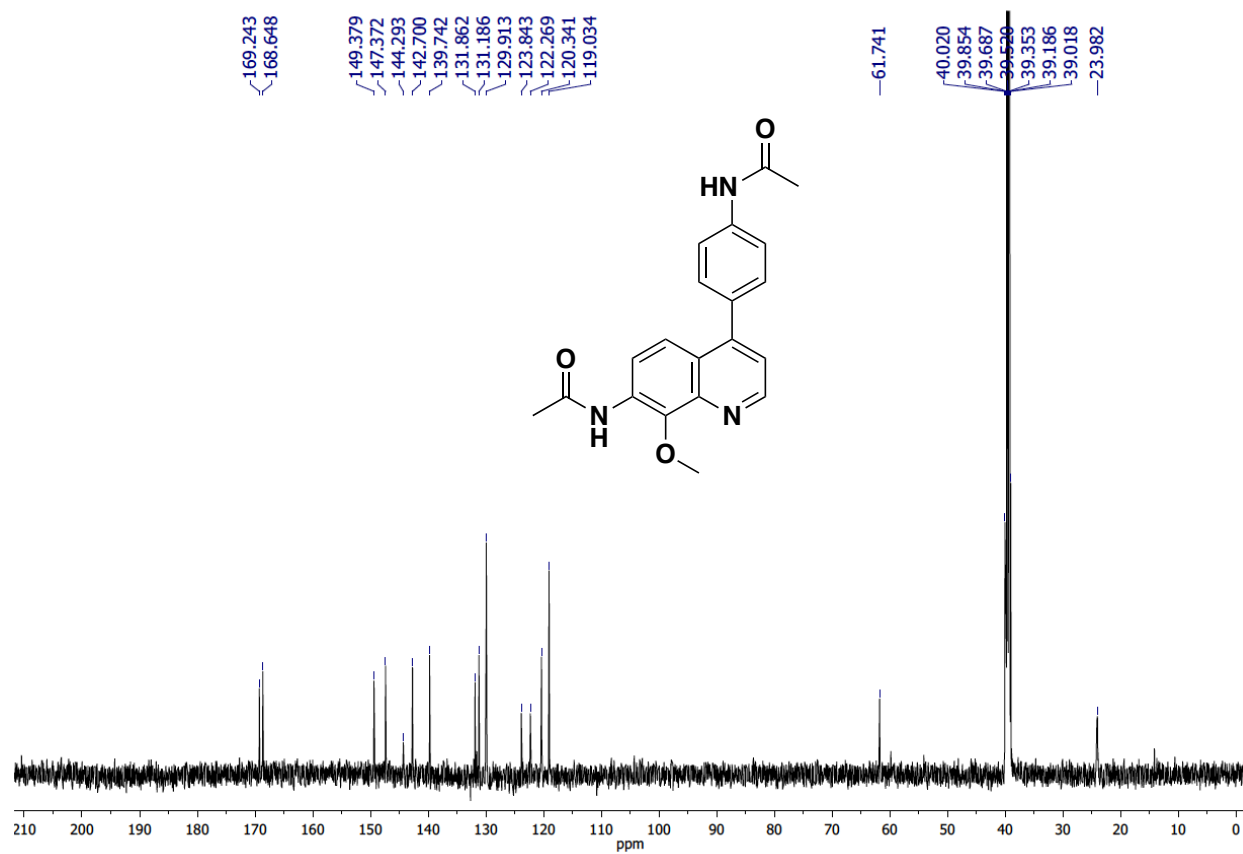

# 7-Acetamido-4-(4-acetamidophenyl)-8-methoxyquinoline (18)

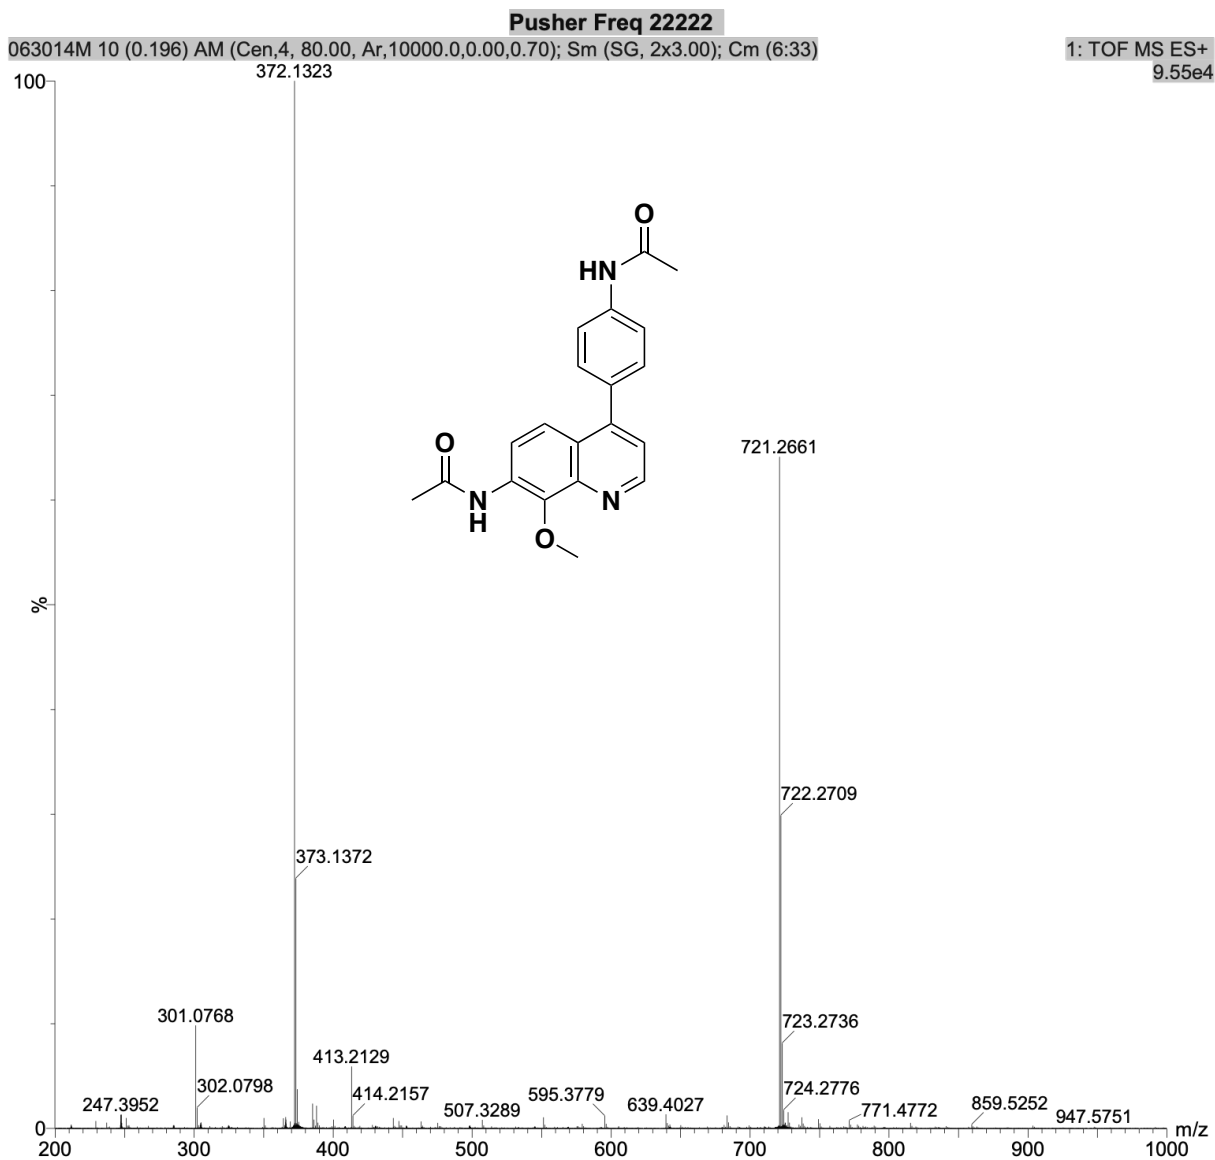

7-Acetamido-4-(4-acetamidophenyl)-8-methoxyquinoline (18)

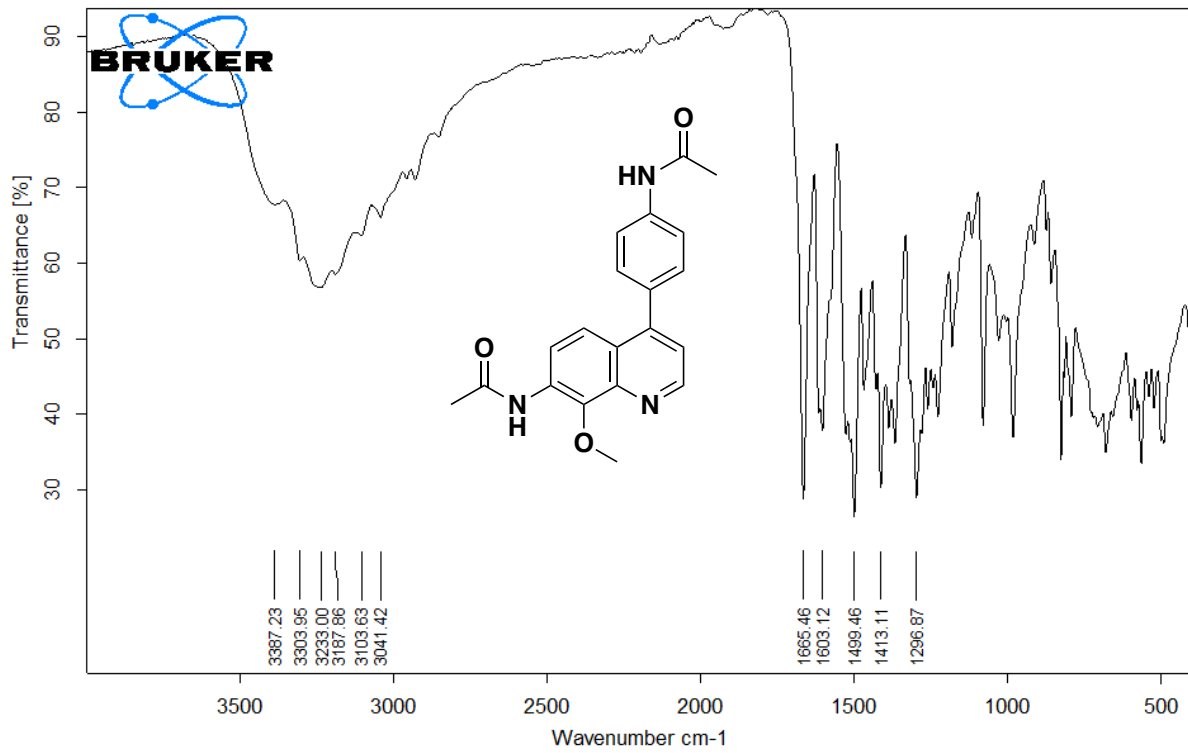



7-Acetamido-4-(3-acetamidophenyl)-8-methoxyquinoline (19) in DMSO

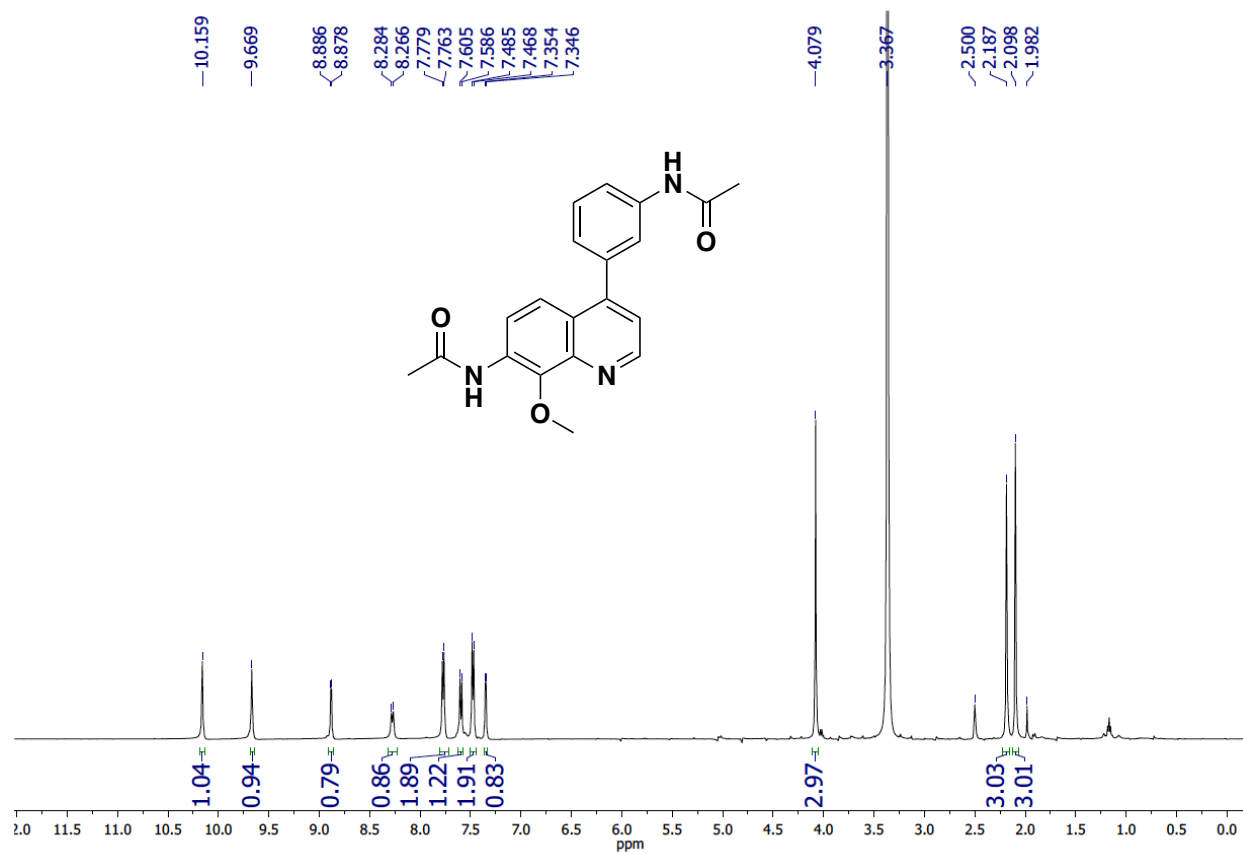

7-Acetamido-4-(3-acetamidophenyl)-8-methoxyquinoline (19) in DMSO

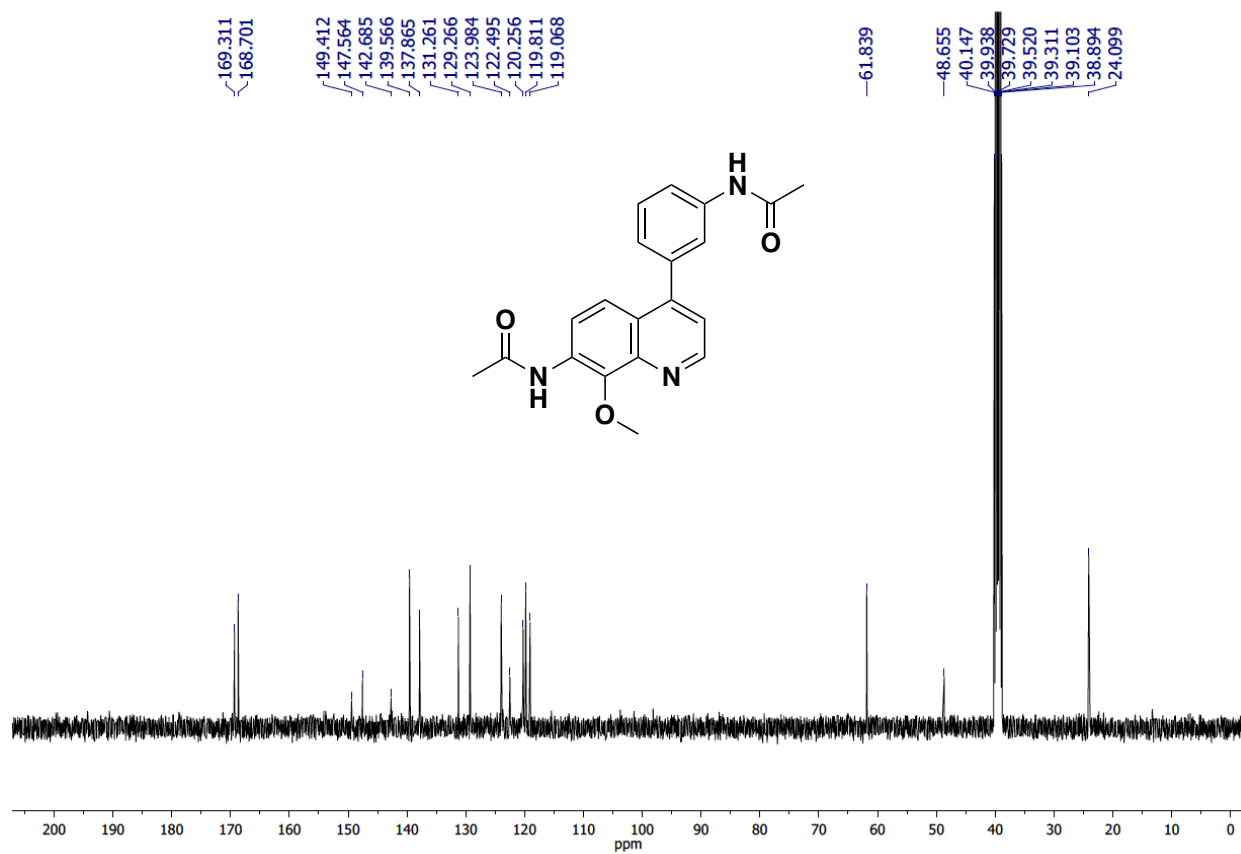

7-Acetamido-4-(3-acetamidophenyl)-8-methoxyquinoline (19)

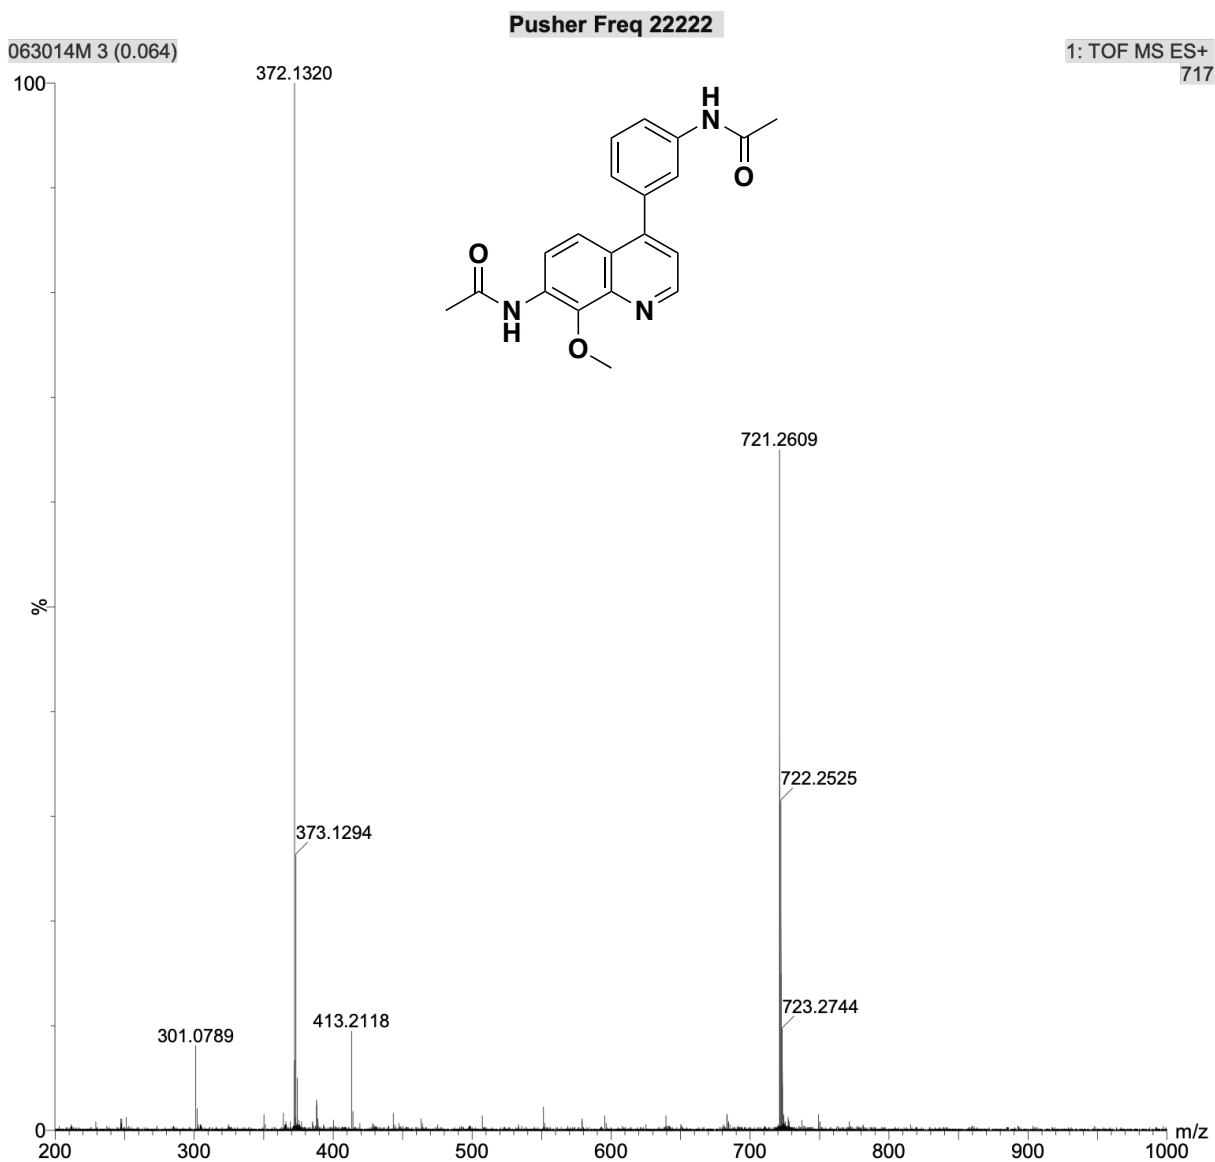

7-Acetamido-4-(3-acetamidophenyl)-8-methoxyquinoline (19)

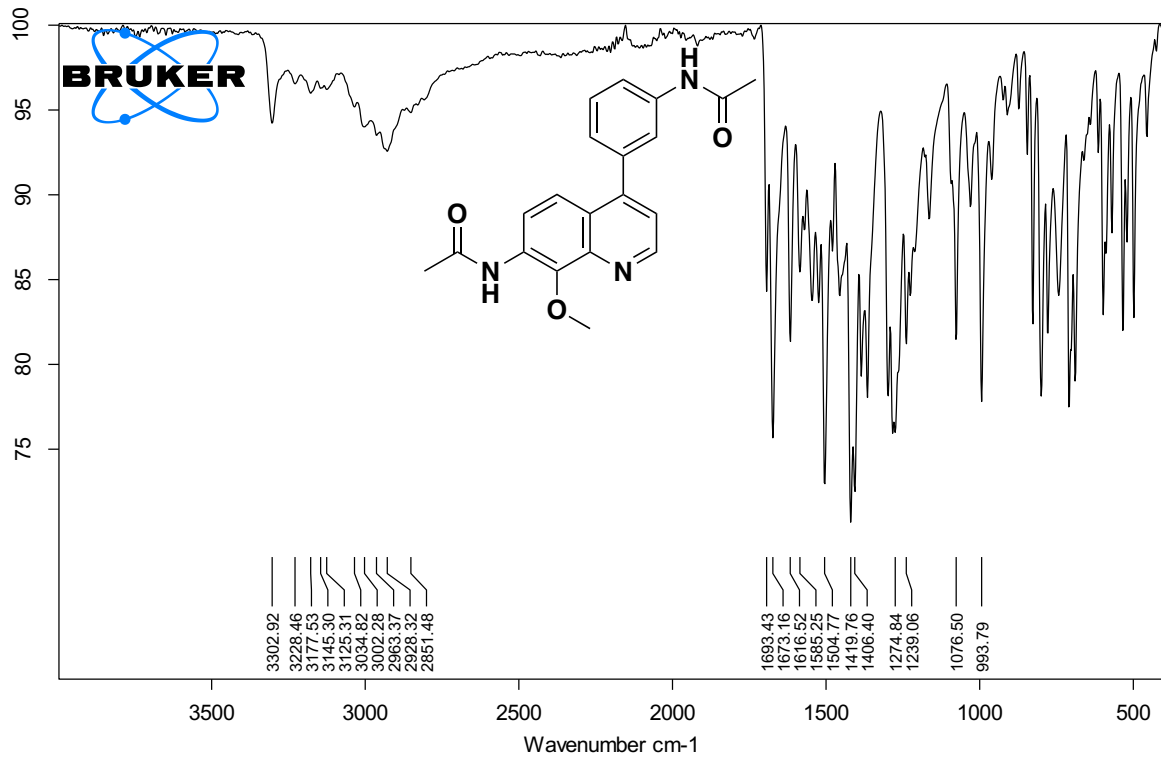

7-Acetamido-4-(5-fluoro-2-hydroxyphenyl)-8-methoxyquinoline (20) in DMSO-d<sub>6</sub>

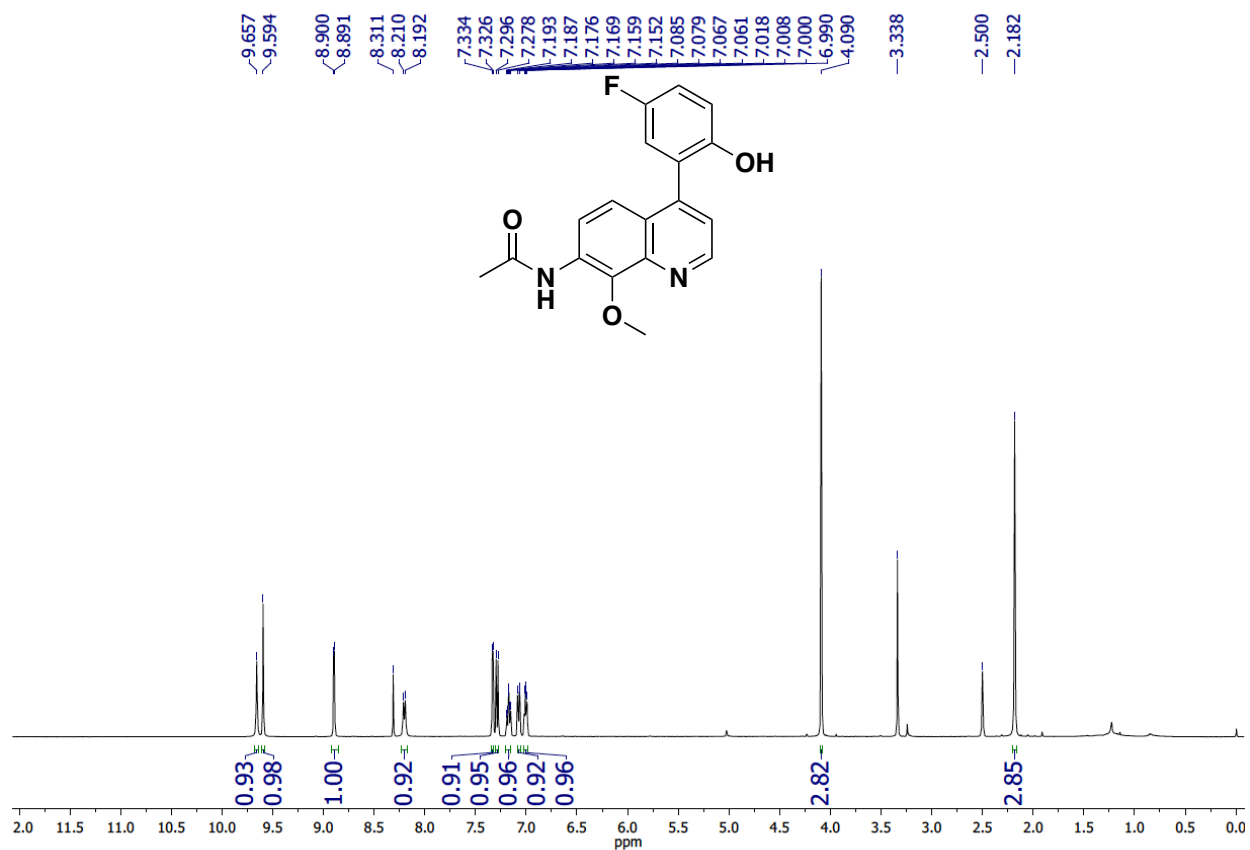

7-Acetamido-4-(5-fluoro-2-hydroxyphenyl)-8-methoxyquinoline (20) in DMSO-d<sub>6</sub>

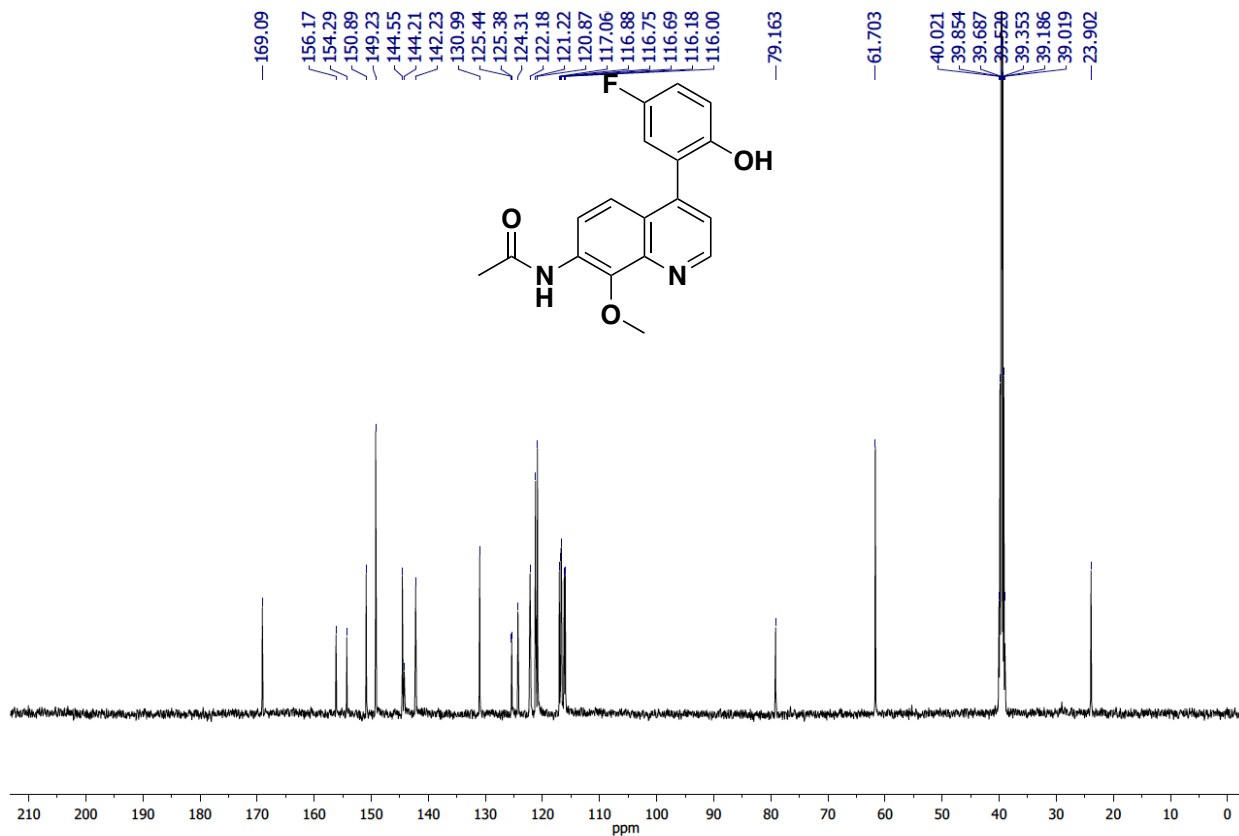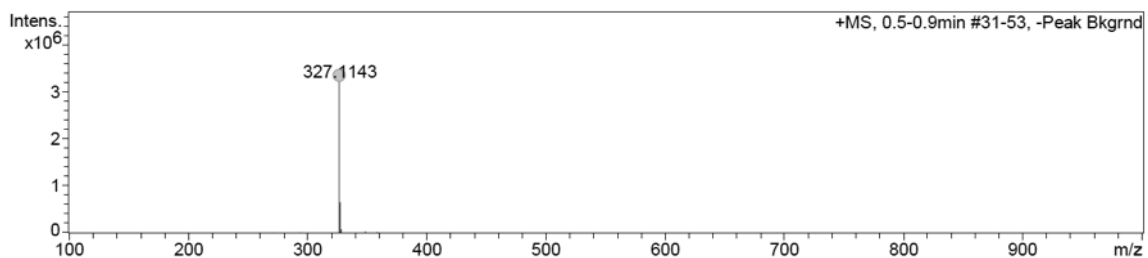

7-Acetamido-4-(5-fluoro-2-hydroxyphenyl)-8-methoxyquinoline (20)

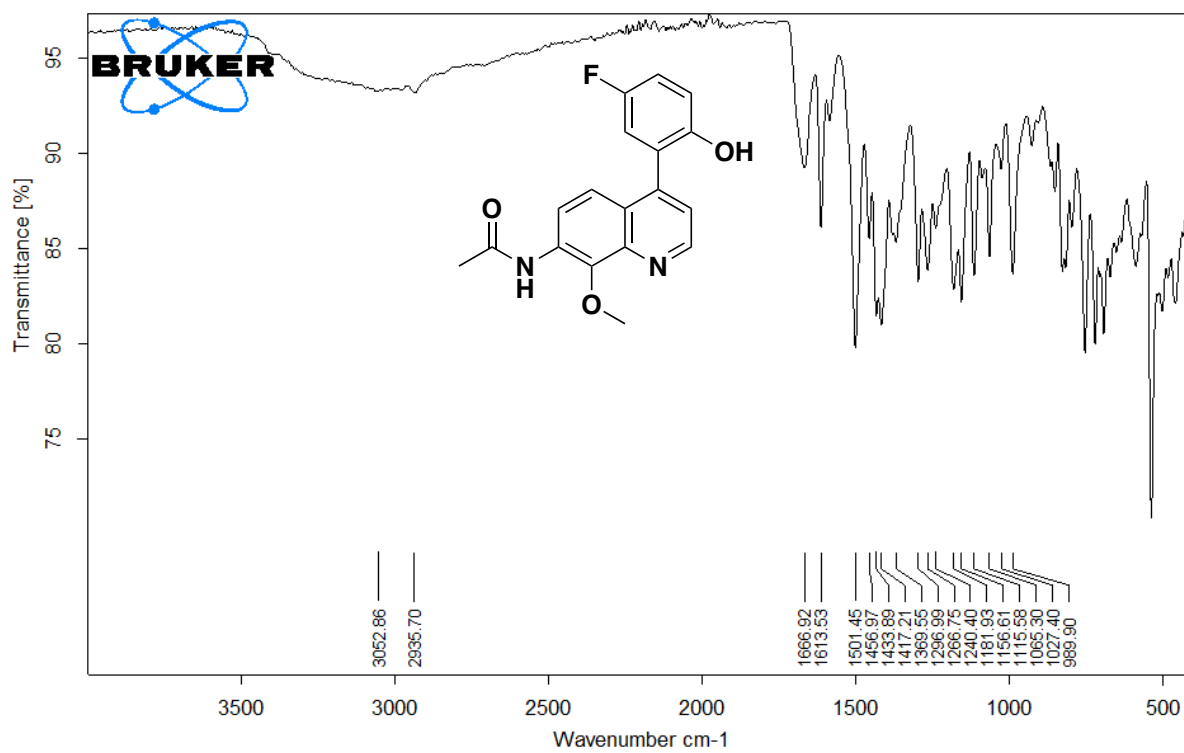

7-Acetamido-4-(2-methoxy-(5-trifluoromethyl)phenyl)-8-methoxyquinoline (21) in CDCl<sub>3</sub>

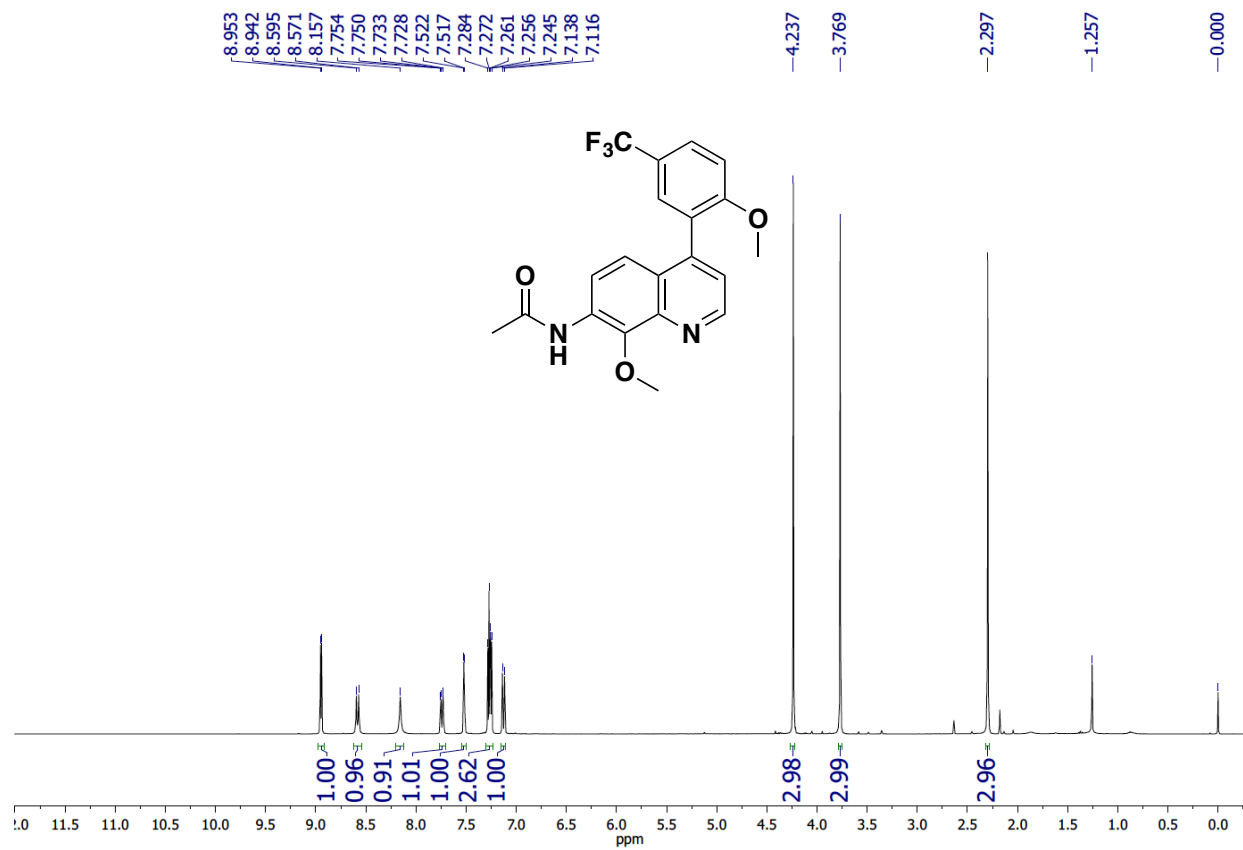



7-Acetamido-4-(2-methoxy-(5-trifluoromethyl)phenyl)-8-methoxyquinoline (21) in CDCl<sub>3</sub>

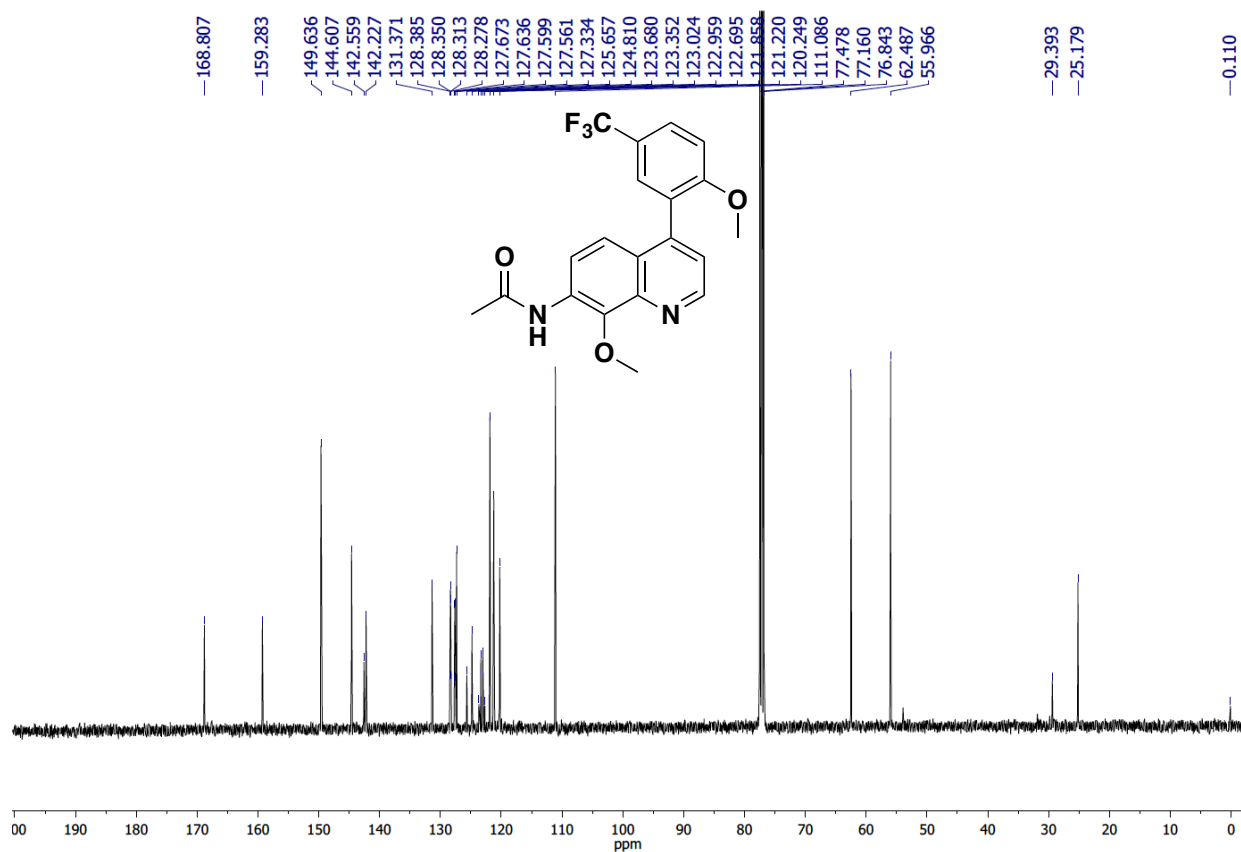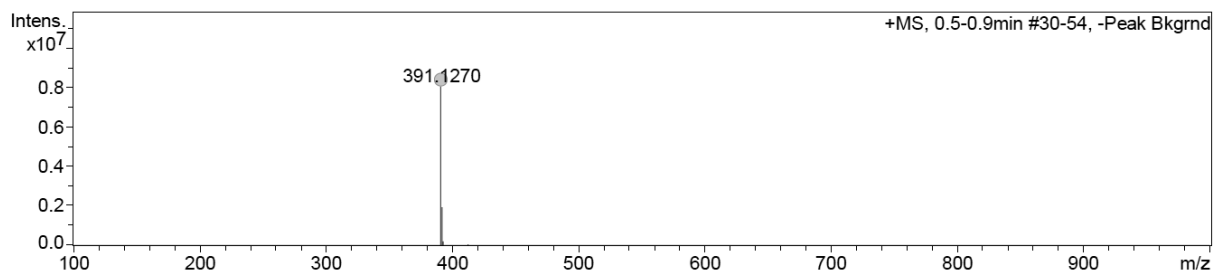

7-Acetamido-4-(2-methoxy-(5-trifluoromethyl)phenyl)-8-methoxyquinoline (21)

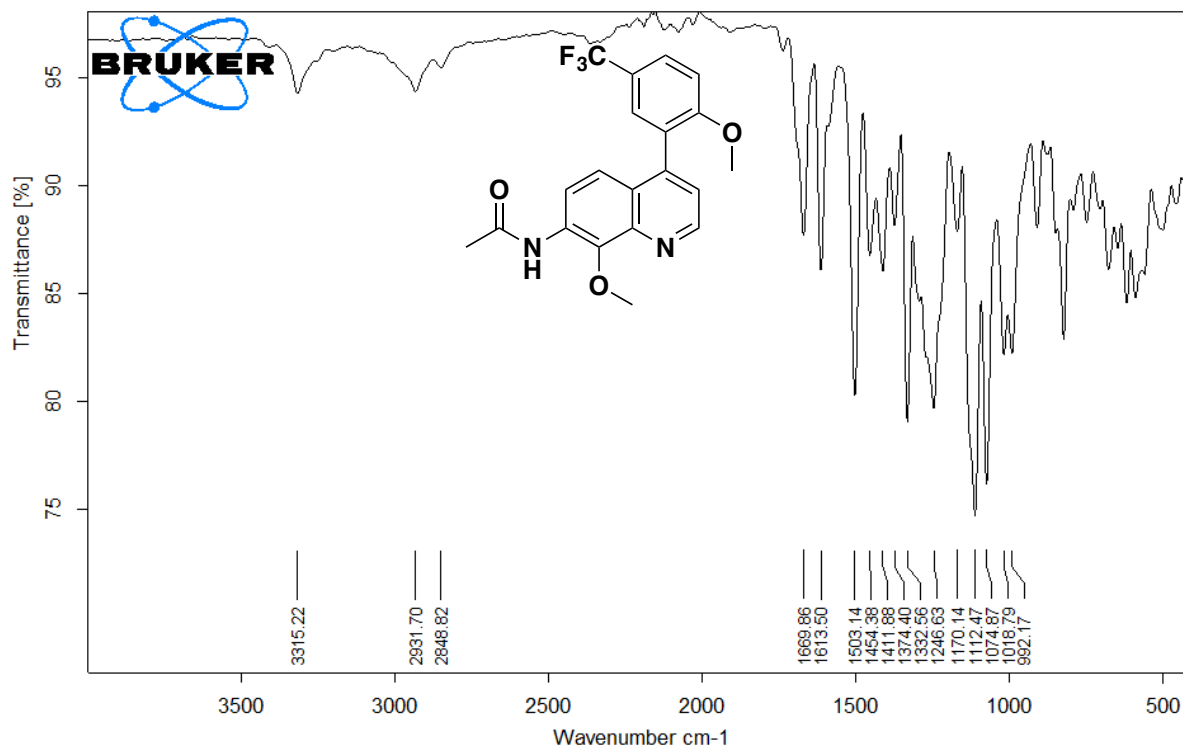

7-Acetamido-4-(5-chloro-2-methoxyphenyl)-8-methoxyquinoline (22) in DMSO

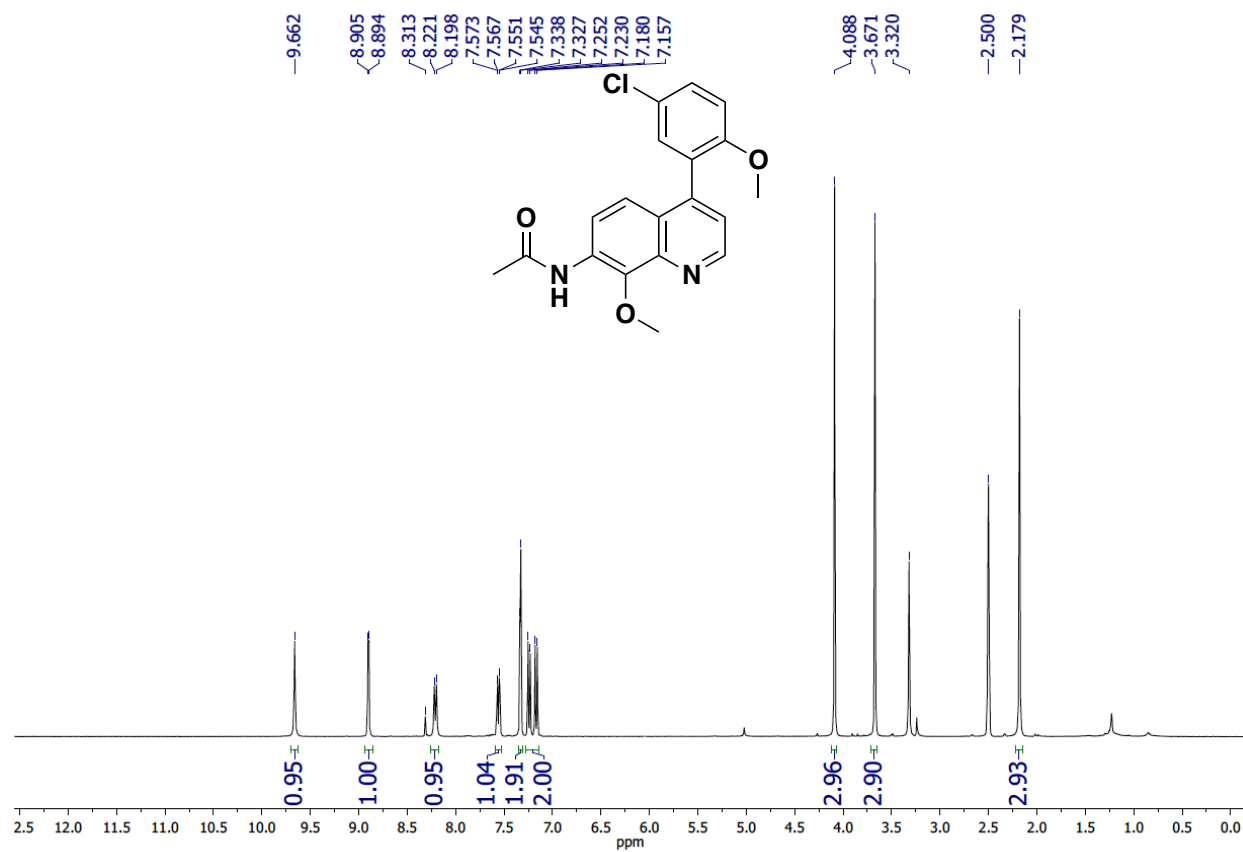

7-Acetamido-4-(5-chloro-2-methoxyphenyl)-8-methoxyquinoline (22) in DMSO

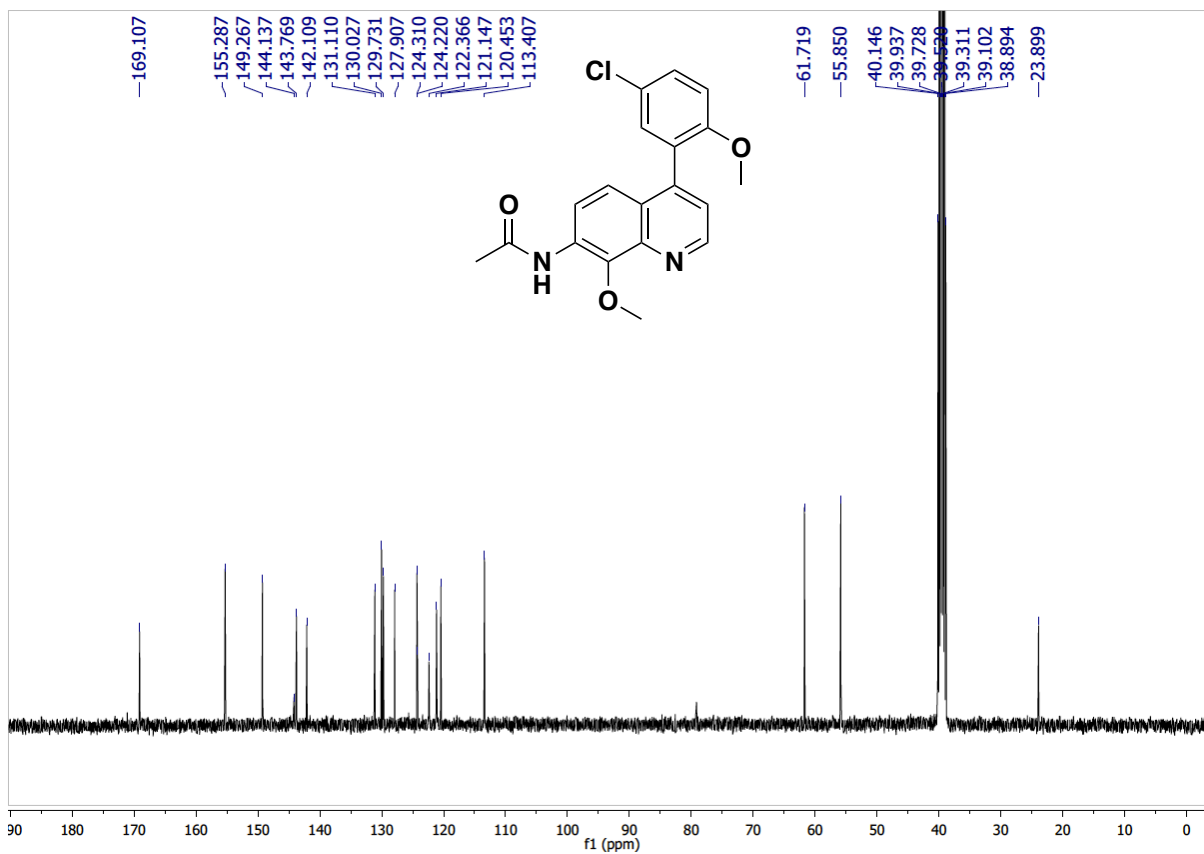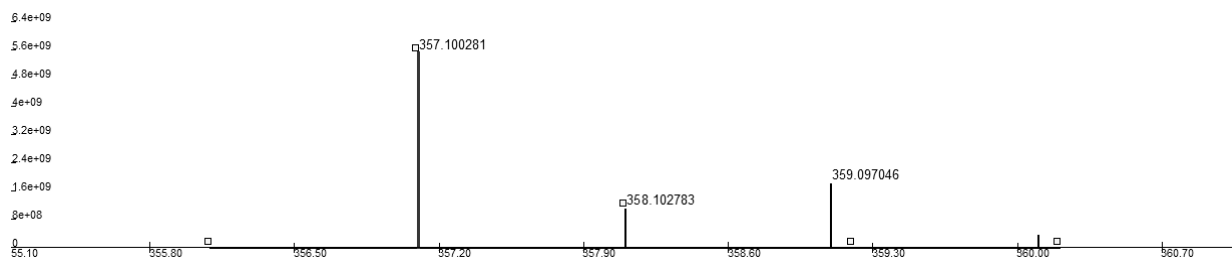

7-Acetamido-4-(5-chloro-2-methoxyphenyl)-8-methoxyquinoline (22)

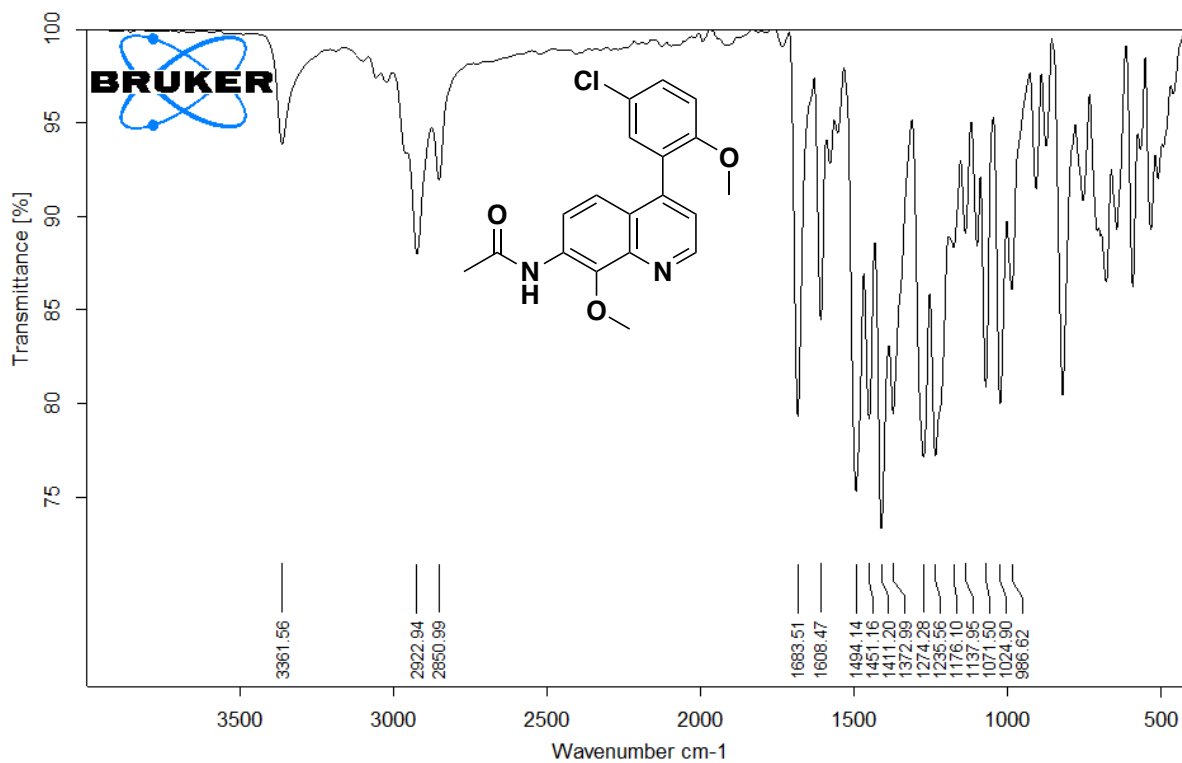

8-Methoxy-4-(phenyl)-7-pivalamidoquinoline (23) in CDCl<sub>3</sub>

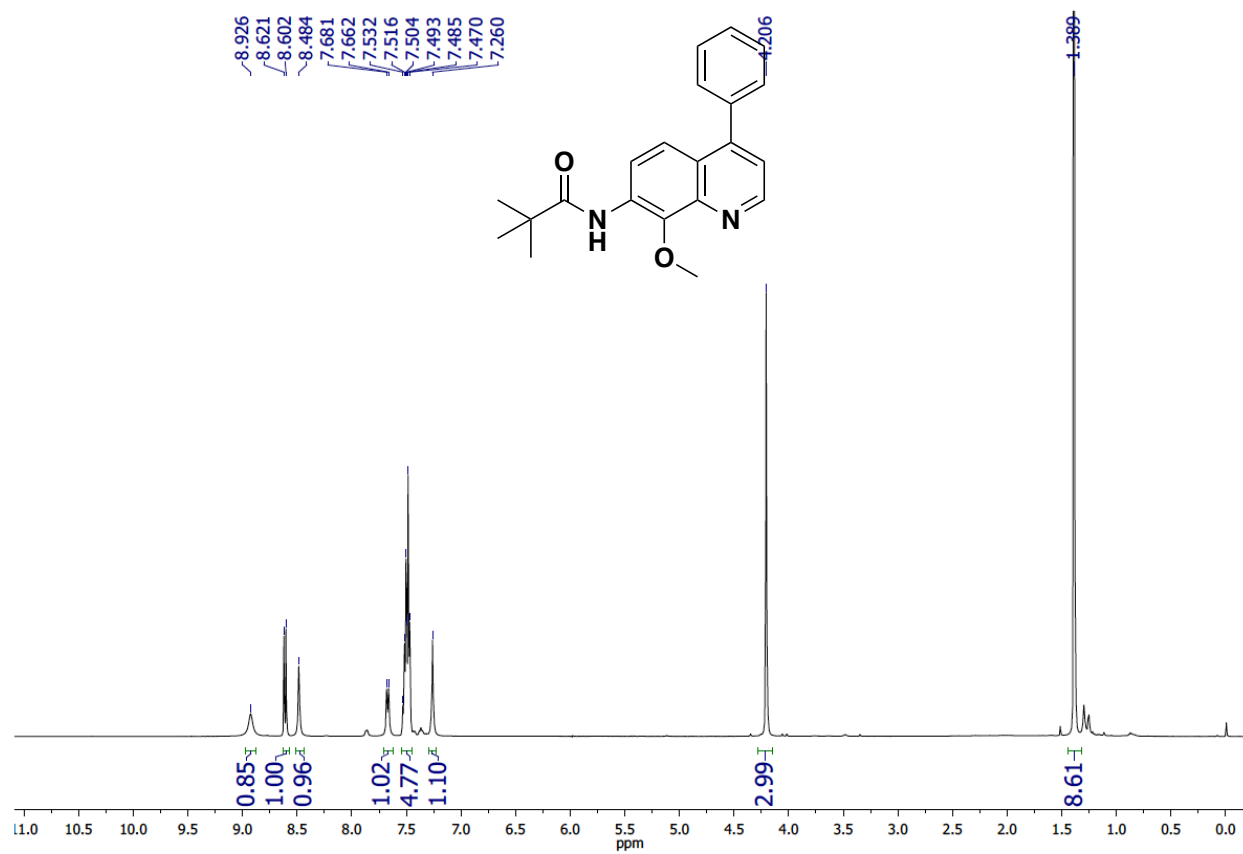

8-Methoxy-4-(phenyl)-7-pivalamidoquinoline (23) in CDCl<sub>3</sub>

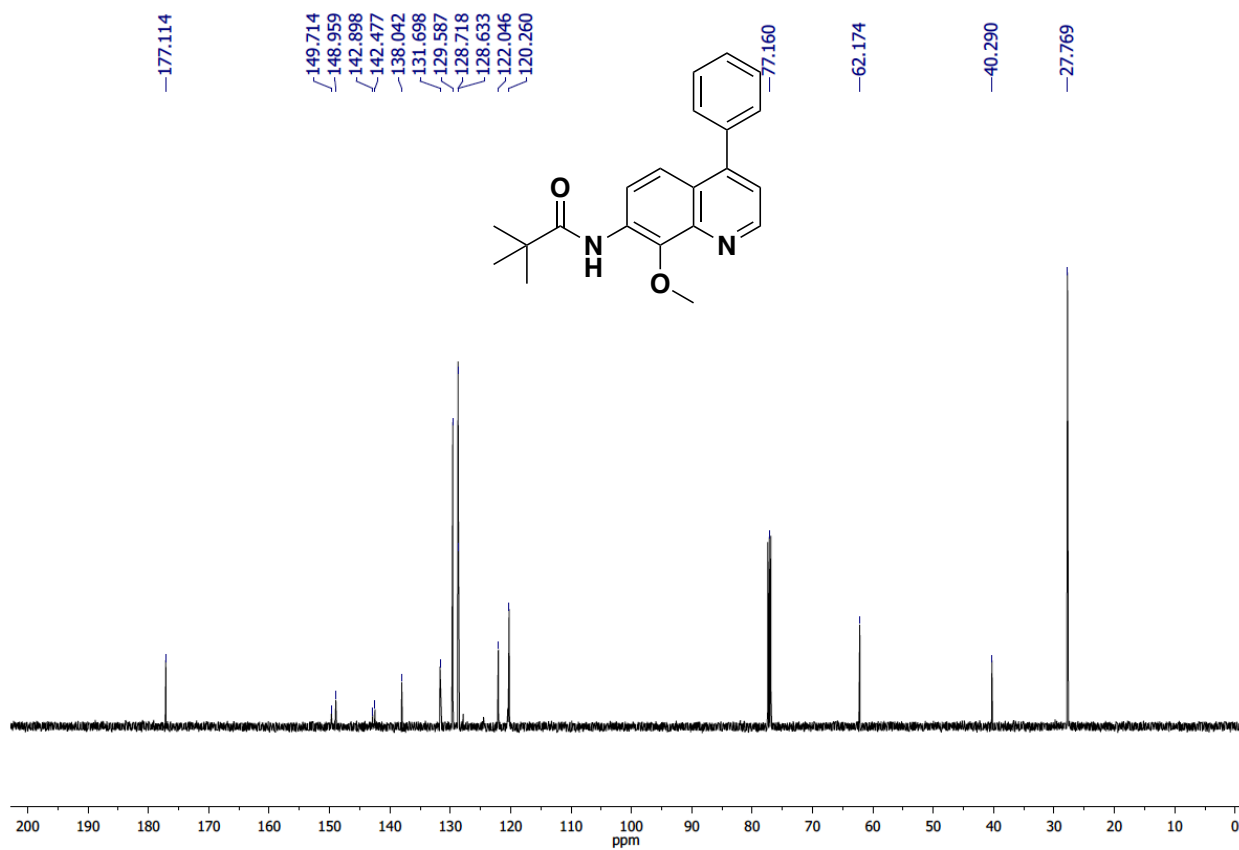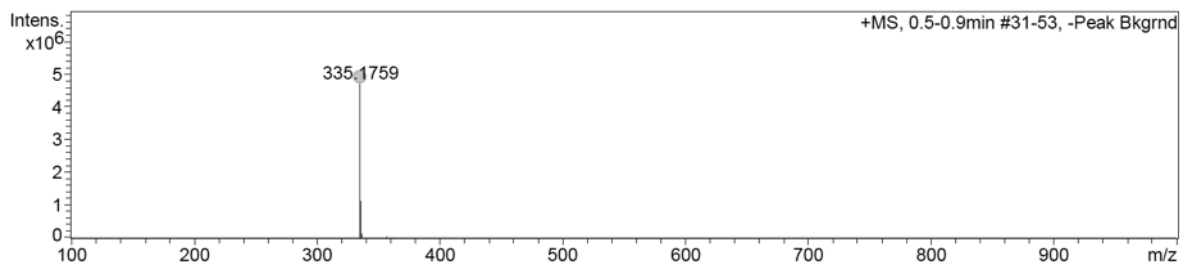

8-Methoxy-4-(phenyl)-7-pivalamidoquinoline (23)

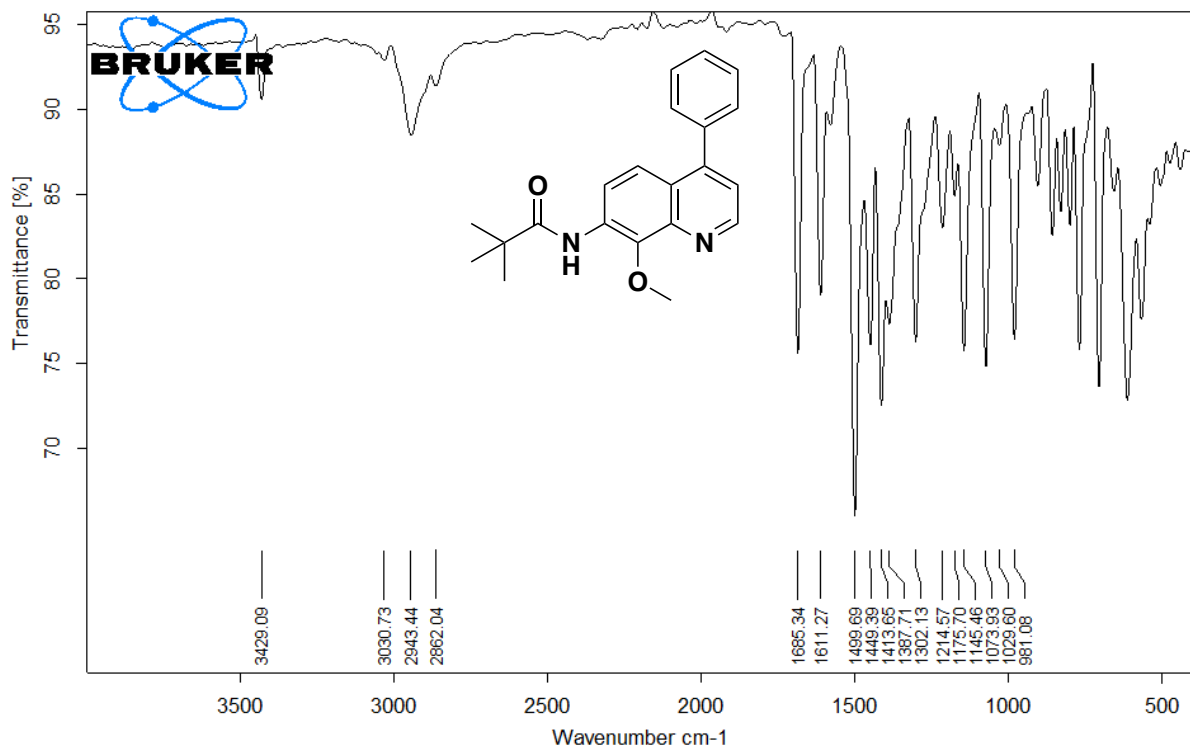



4-(5-fluoro-2-methoxyphenyl)-8-methoxy-7-pivalamidoquinoline (24) in CDCl<sub>3</sub>

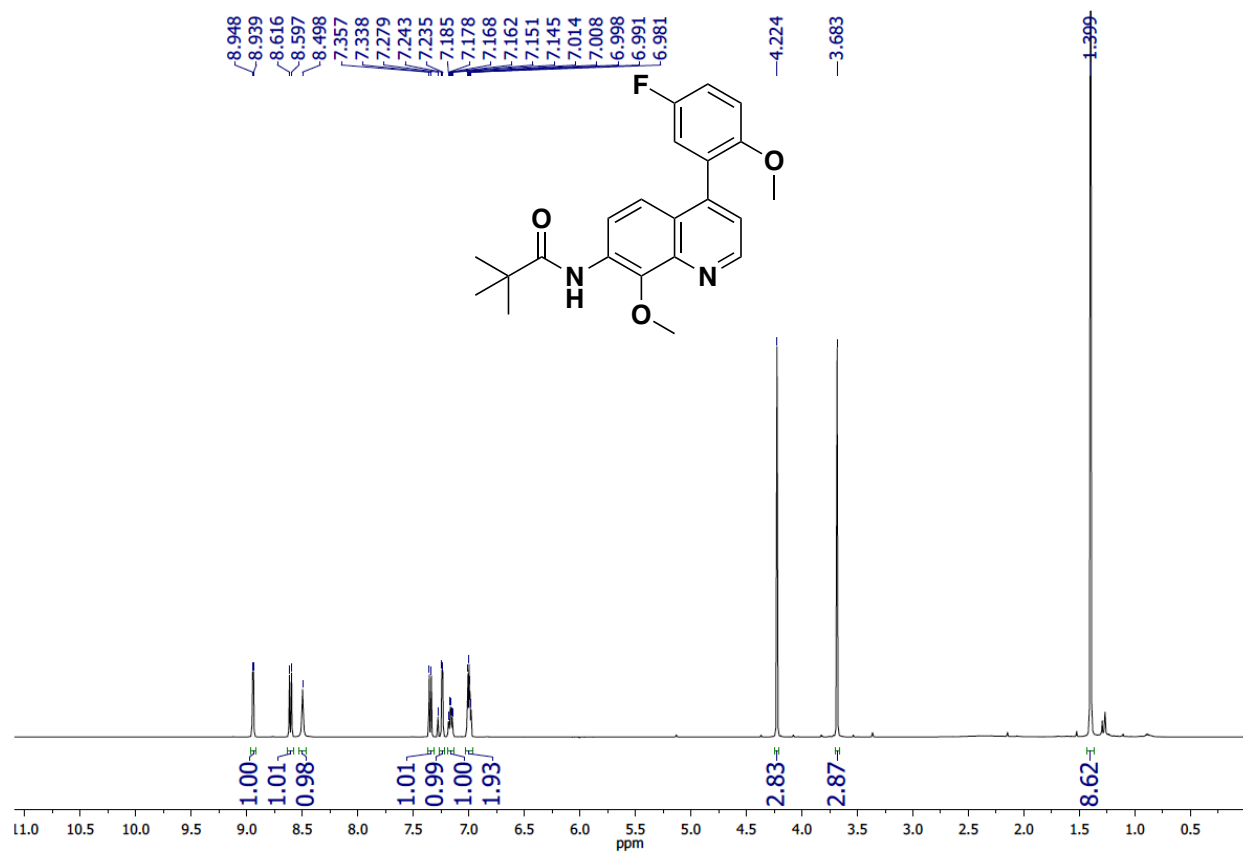

4-(5-fluoro-2-methoxyphenyl)-8-methoxy-7-pivalamidoquinoline (24) in CDCl<sub>3</sub>

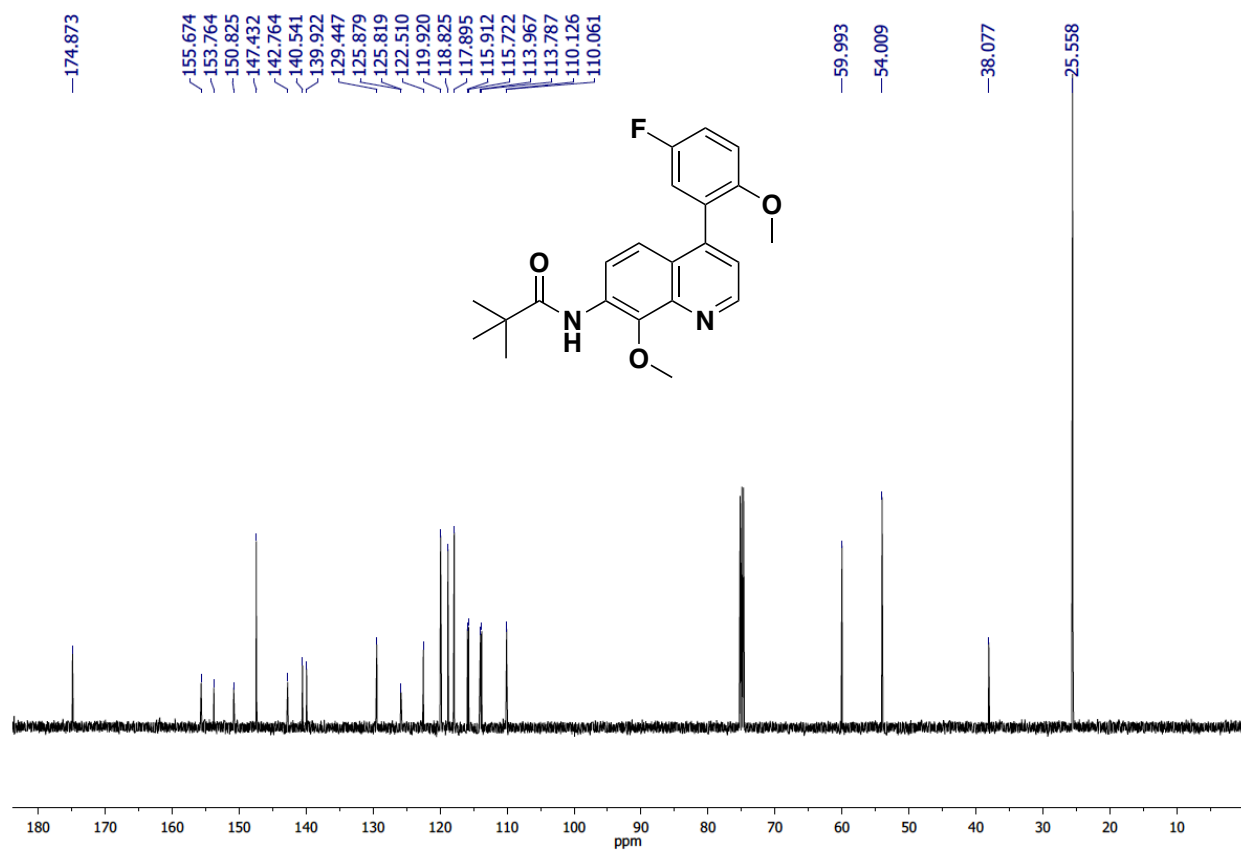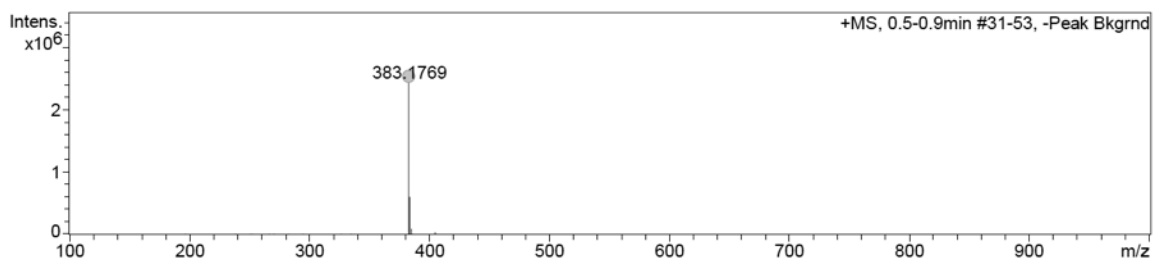

4-(5-fluoro-2-methoxyphenyl)-8-methoxy-7-pivalamidoquinoline (24)

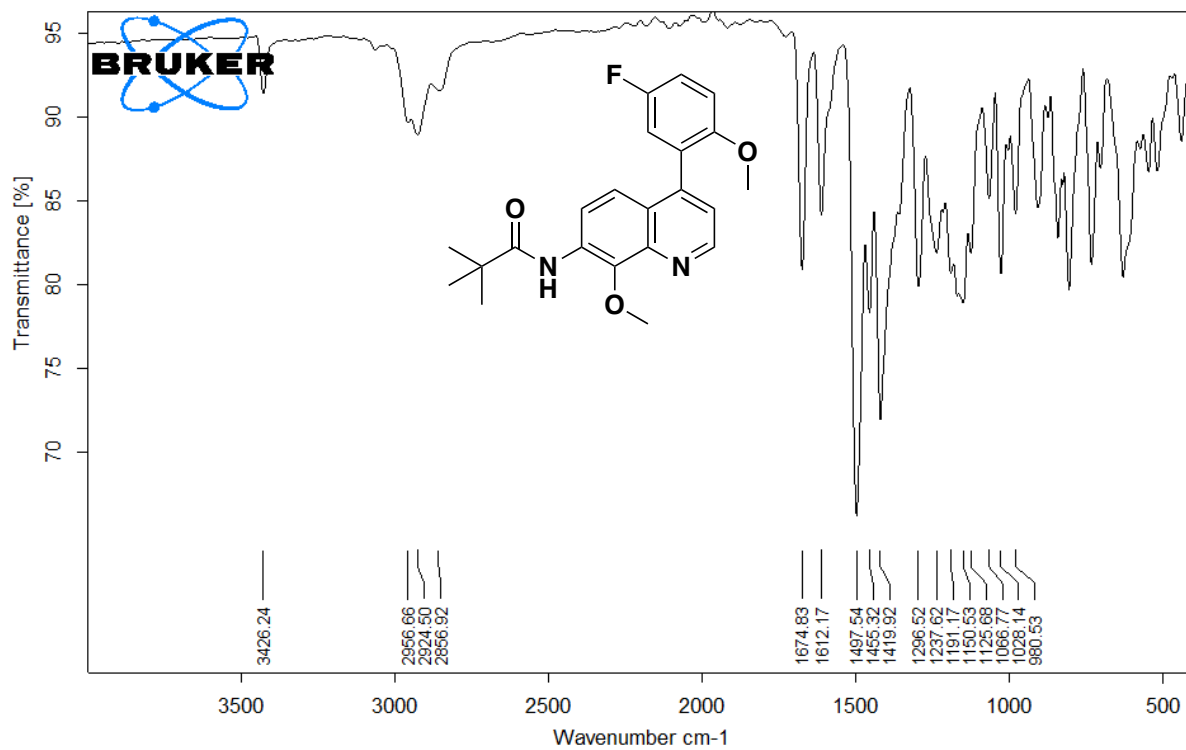

4-(5-fluoro-2-methoxyphenyl)-8-methoxy-7-(2-(morpholin-4-yl)acetamido)quinoline (25) in CDCl<sub>3</sub>

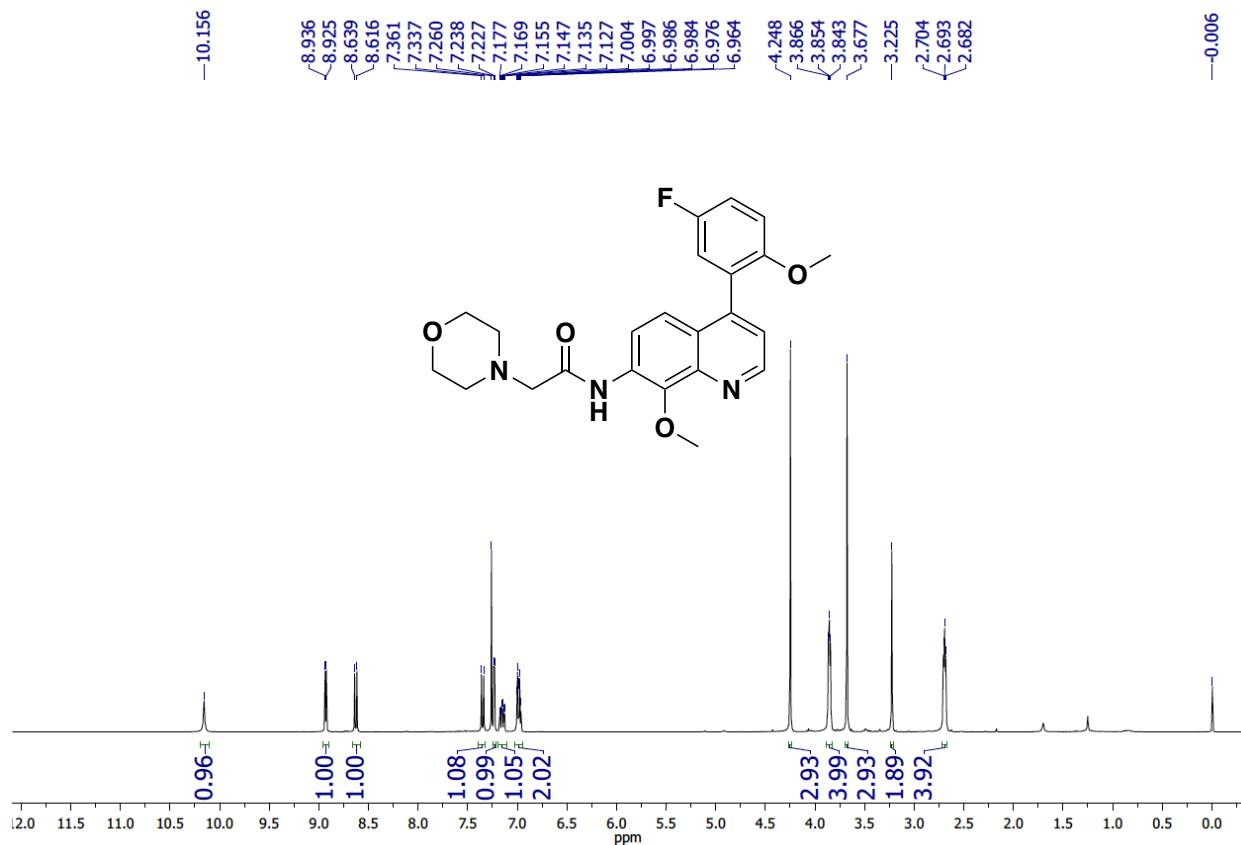

4-(5-fluoro-2-methoxyphenyl)-8-methoxy-7-(2-(morpholin-4-yl)acetamido)quinoline (25) in CDCl<sub>3</sub>

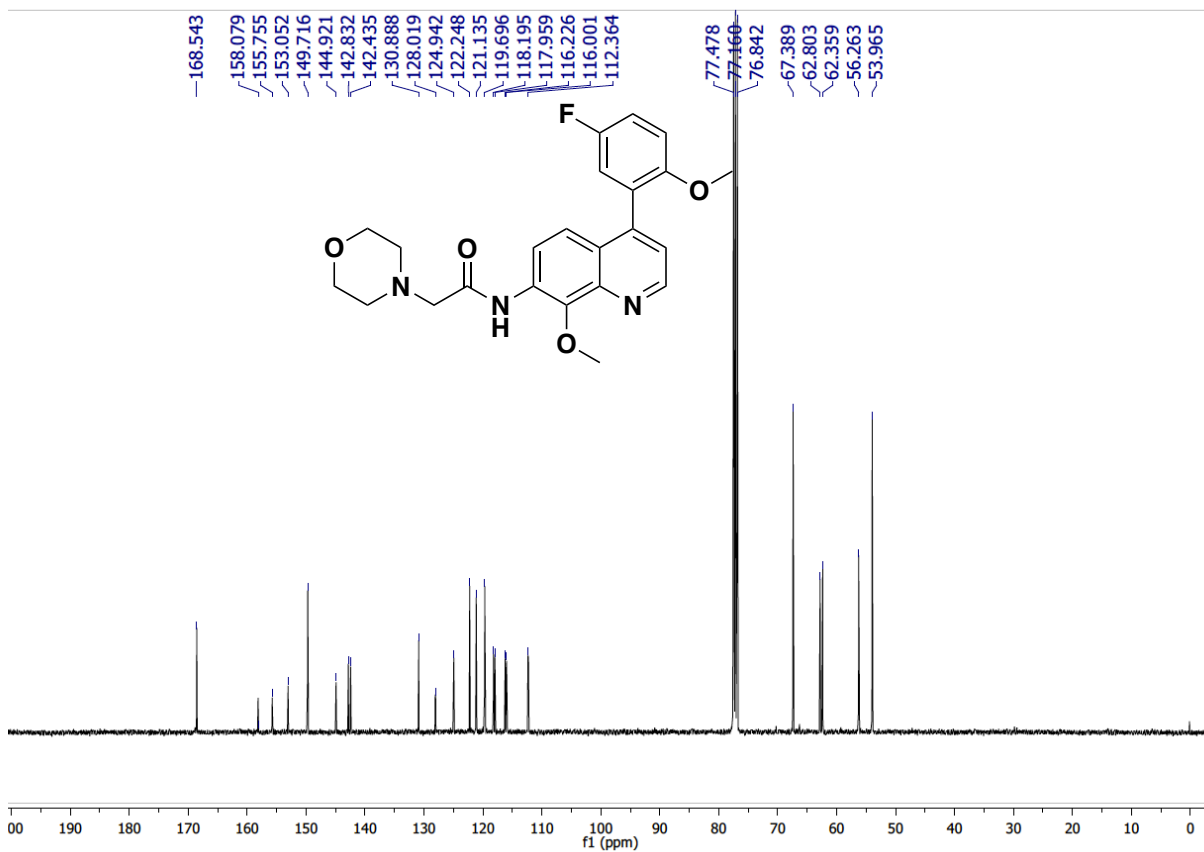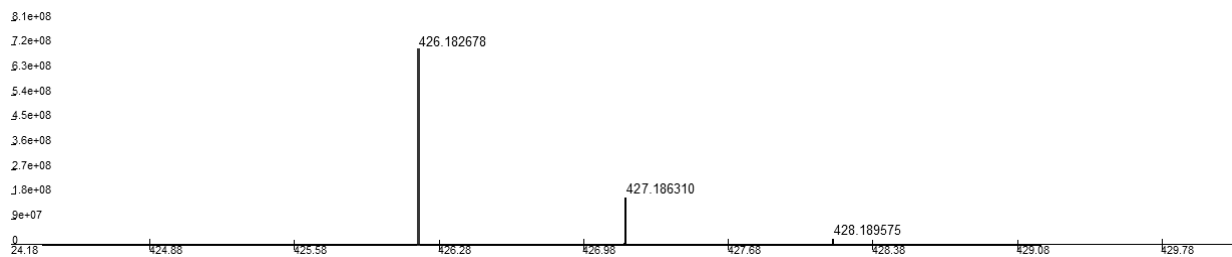

4-(5-fluoro-2-methoxyphenyl)-8-methoxy-7-(2-(morpholin-4-yl)acetamido)quinoline (25)

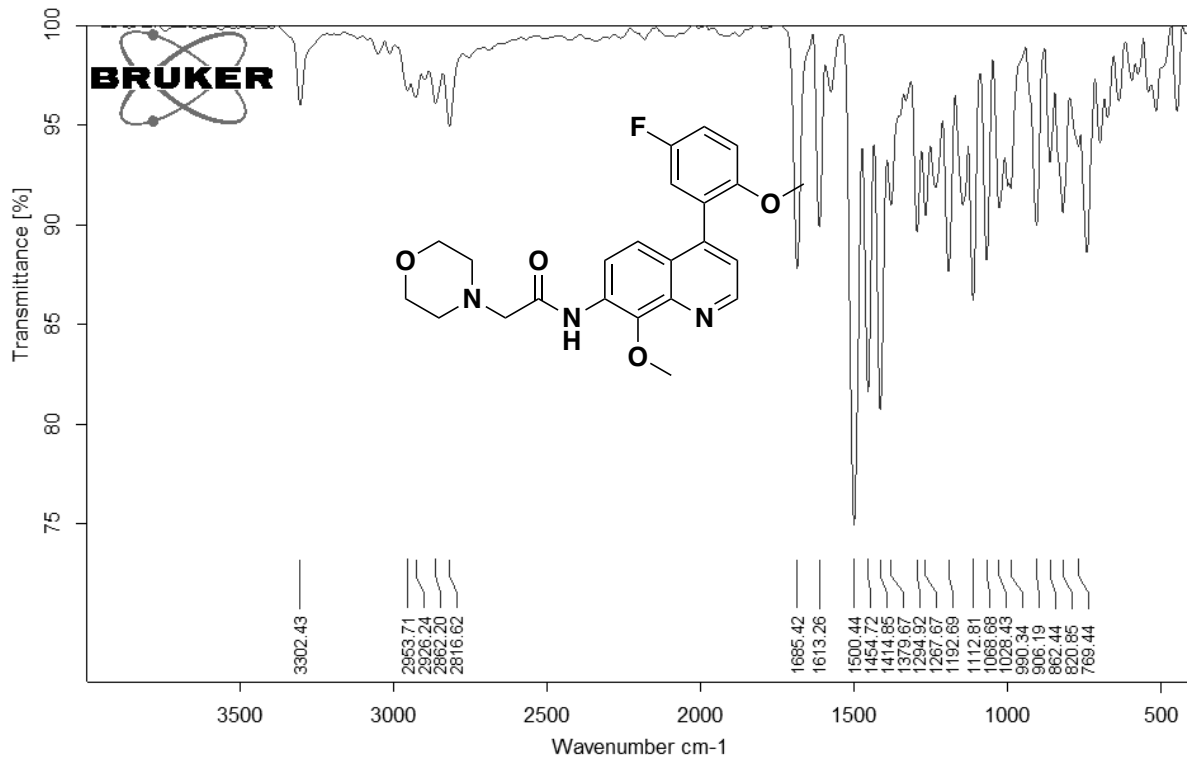

4-(5-fluoro-2-methoxyphenyl)-8-methoxy-7-(3-(morpholin-4-yl)propanamido)quinoline (26) in

CDCl<sub>3</sub>

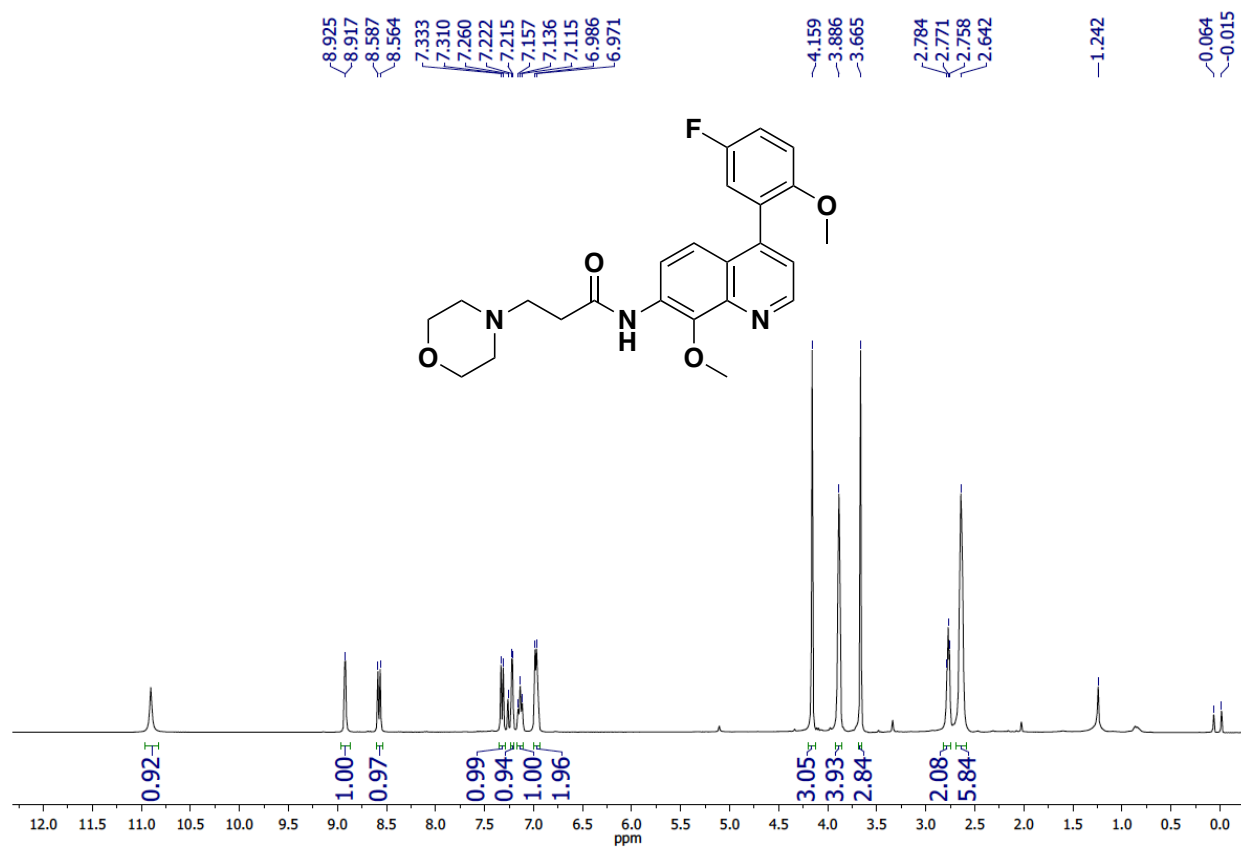

4-(5-fluoro-2-methoxyphenyl)-8-methoxy-7-(3-(morpholin-4-yl)propanamido)quinoline (26) in

CDCl<sub>3</sub>

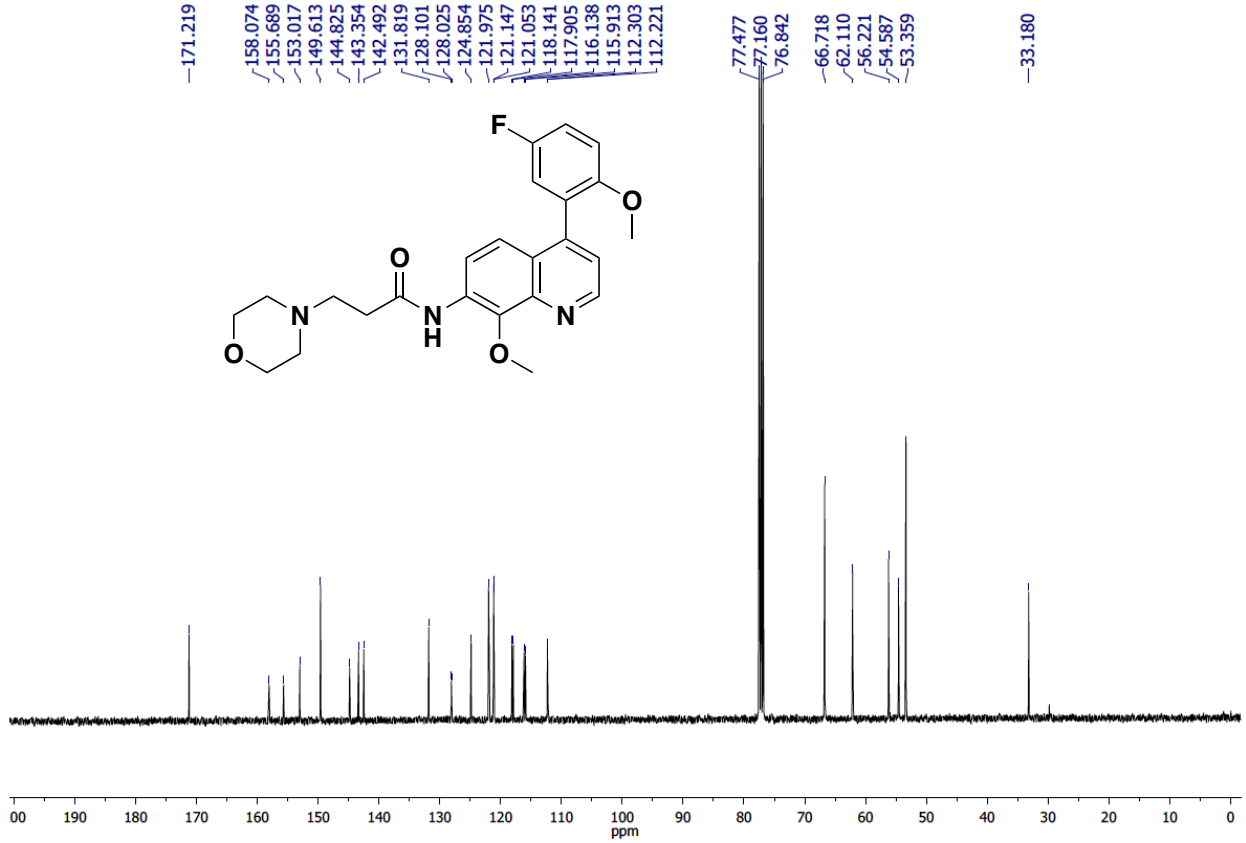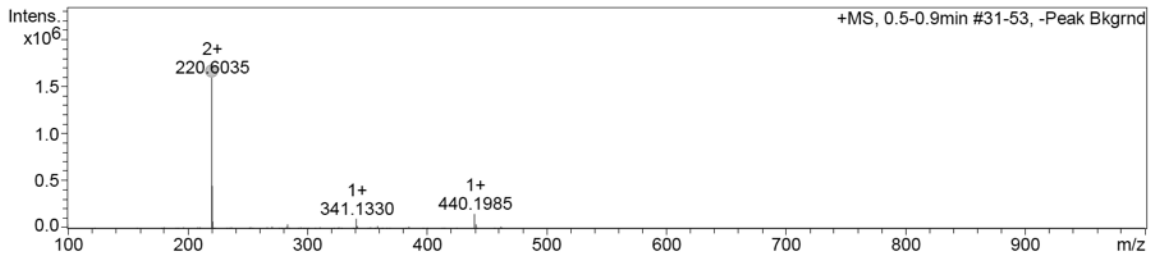



4-(5-fluoro-2-methoxyphenyl)-8-methoxy-7-(3-(morpholin-4-yl)propanamido)quinoline (26)

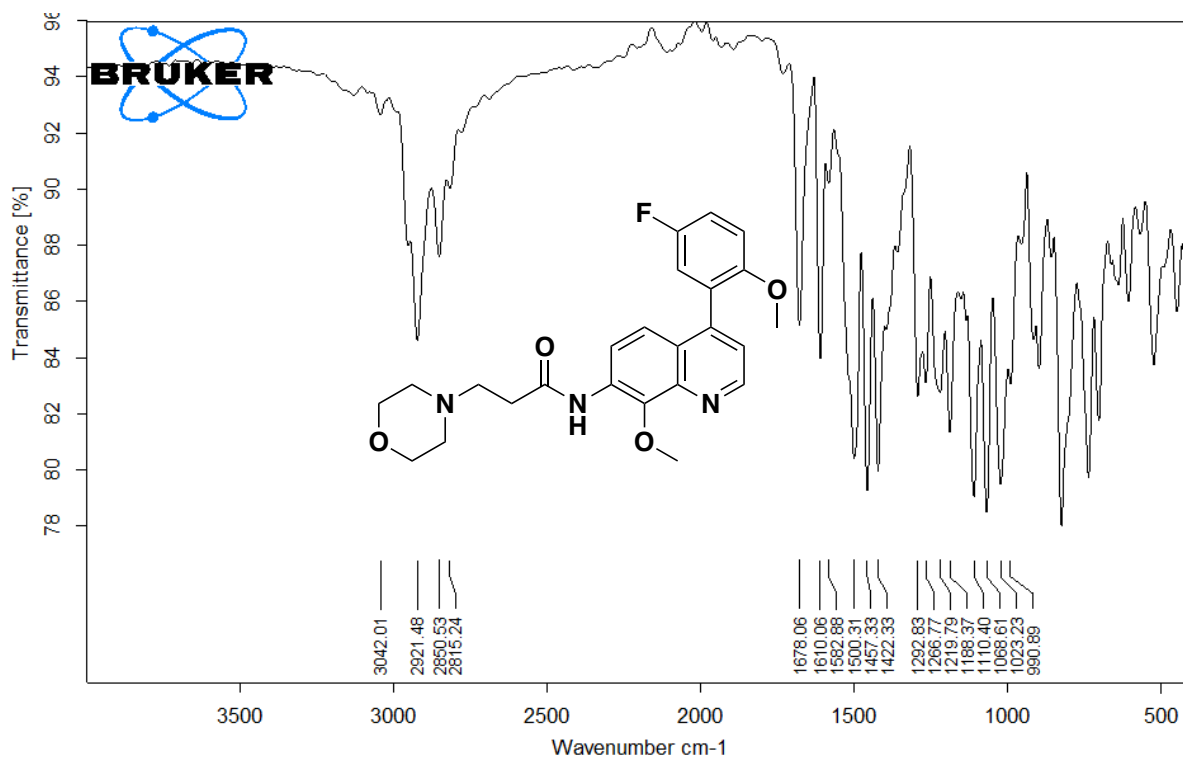

8-Methoxy-7-(3-(morpholin-4-yl)propanamido)-4-(2-nitrophenyl)quinoline in CDCl<sub>3</sub>

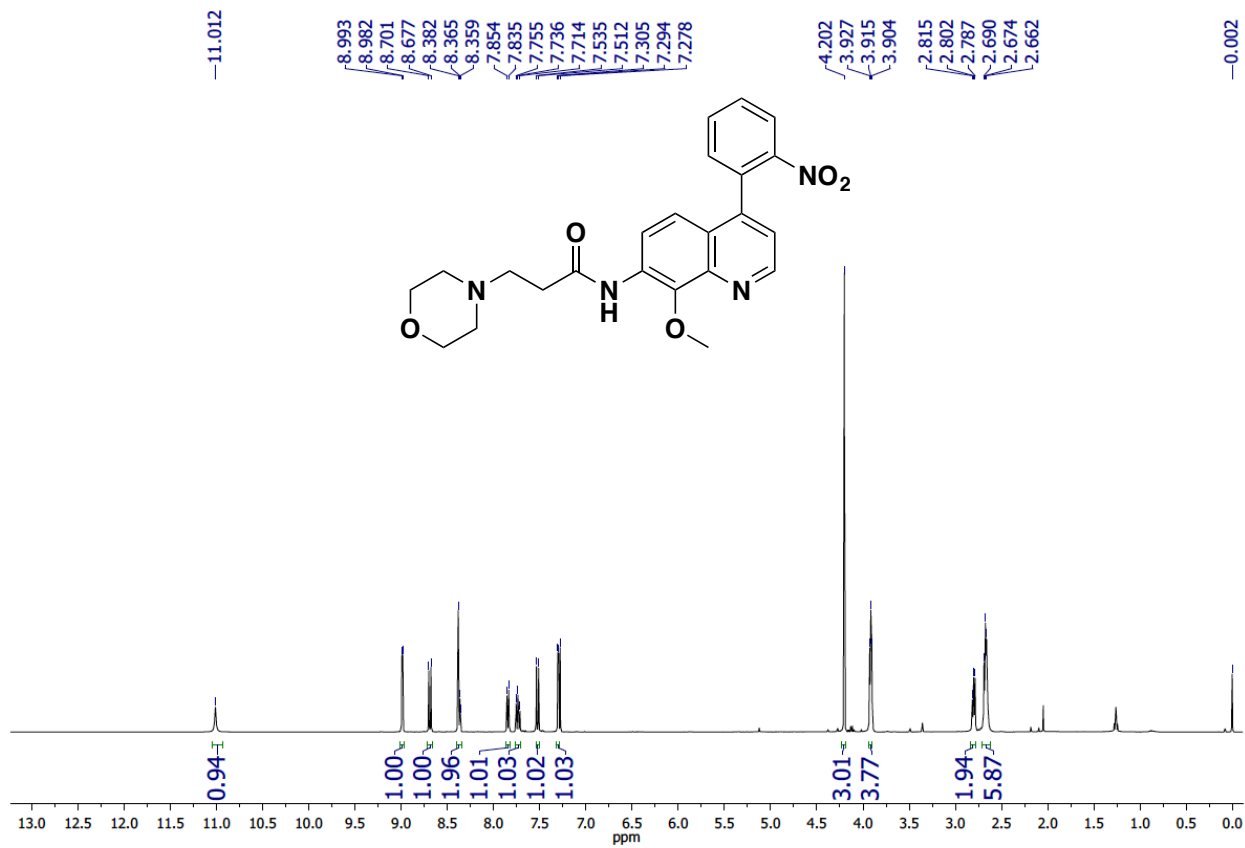

8-Methoxy-7-(3-(morpholin-4-yl)propanamido)-4-(2-nitrophenyl)quinoline in CDCl<sub>3</sub>

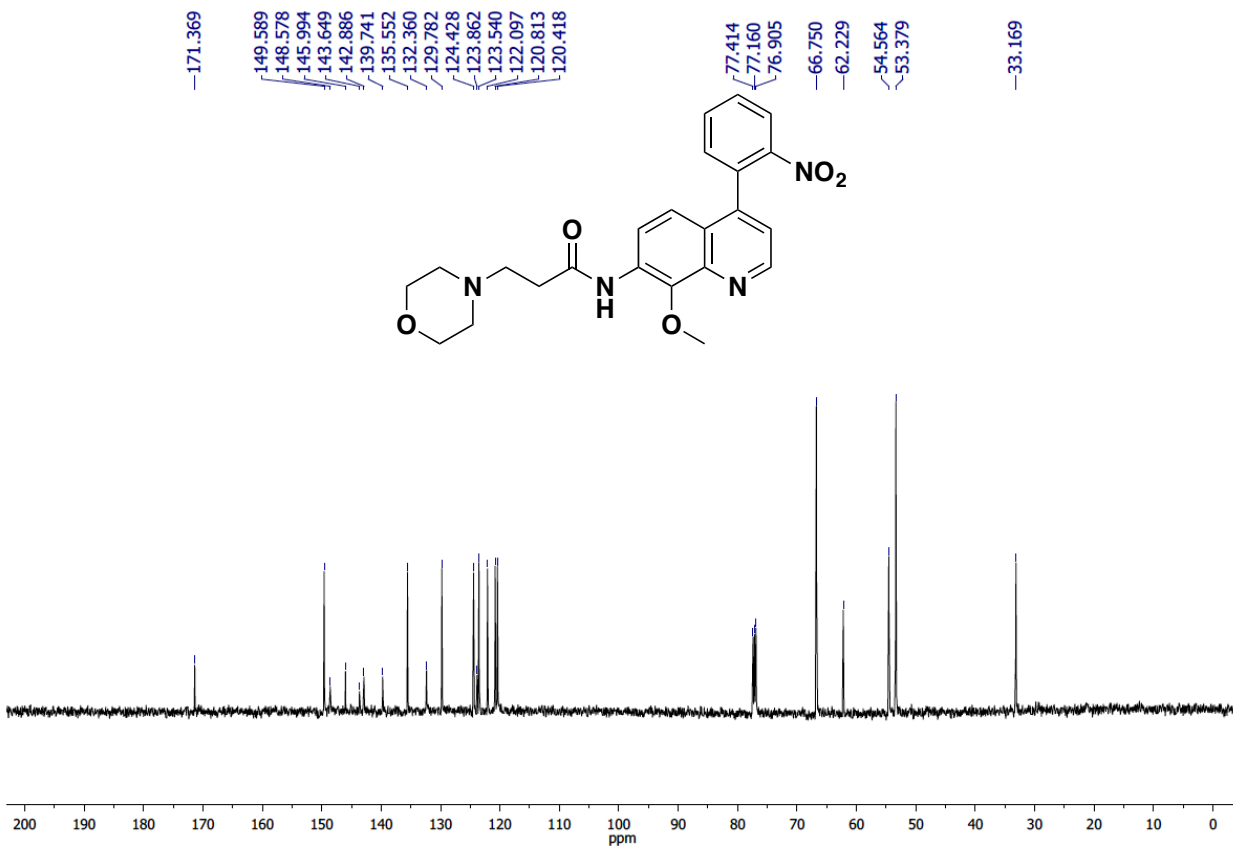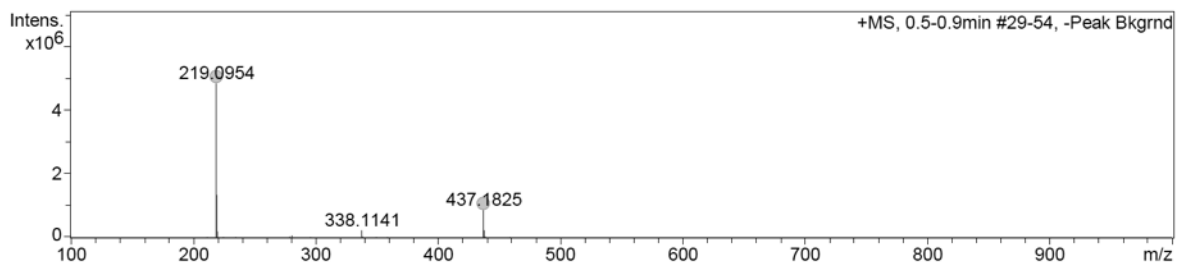

# 8-Methoxy-7-(3-(morpholin-4-yl)propanamido)-4-(2-nitrophenyl)quinoline

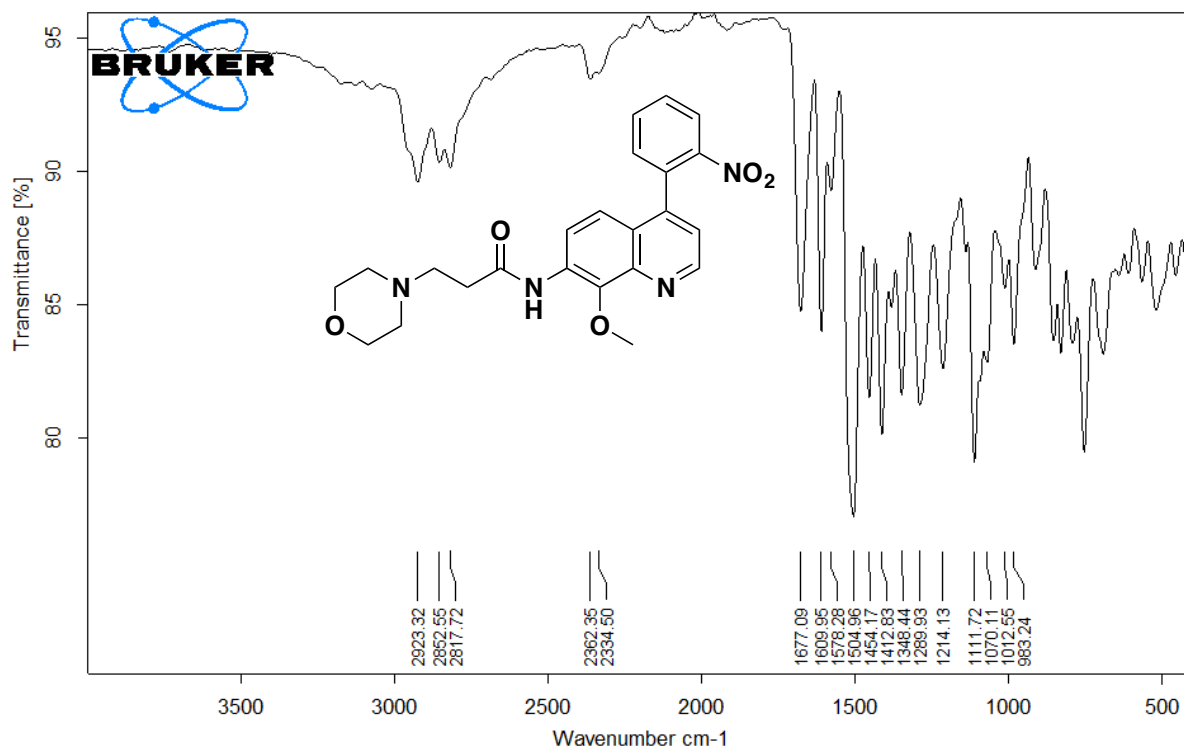

4-(2-Acetamidophenyl)-8-methoxy-7-(3-(morpholin-4-yl)propanamido)quinoline (27) in CDCl<sub>3</sub>

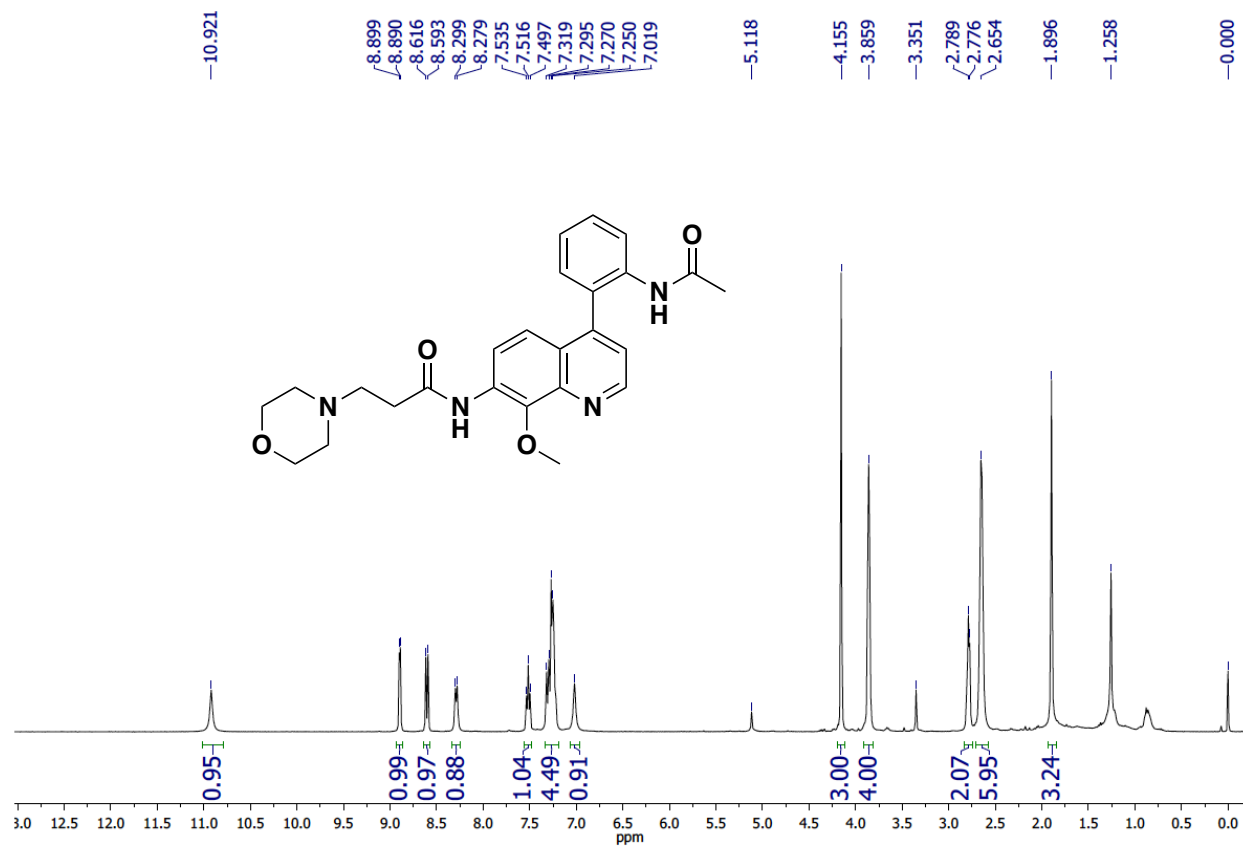

4-(2-Acetamidophenyl)-8-methoxy-7-(3-(morpholin-4-yl)propanamido)quinoline (27)

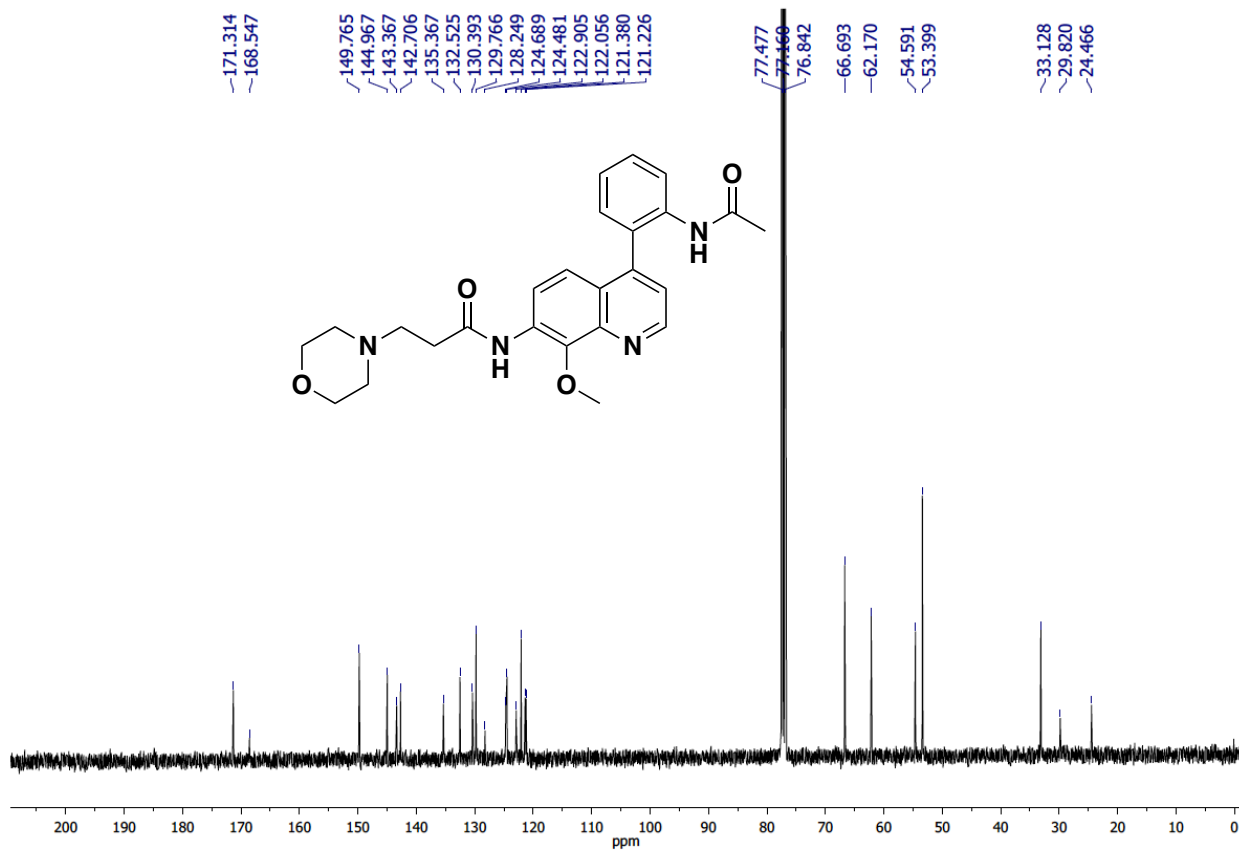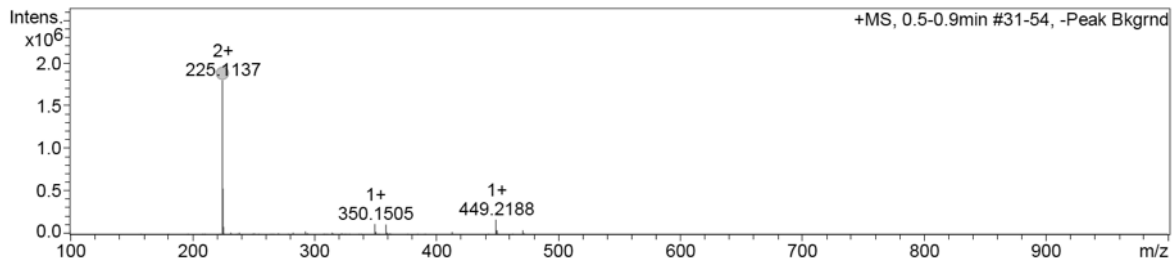

4-(2-Acetamidophenyl)-8-methoxy-7-(3-(morpholin-4-yl)propanamido)quinoline (27)

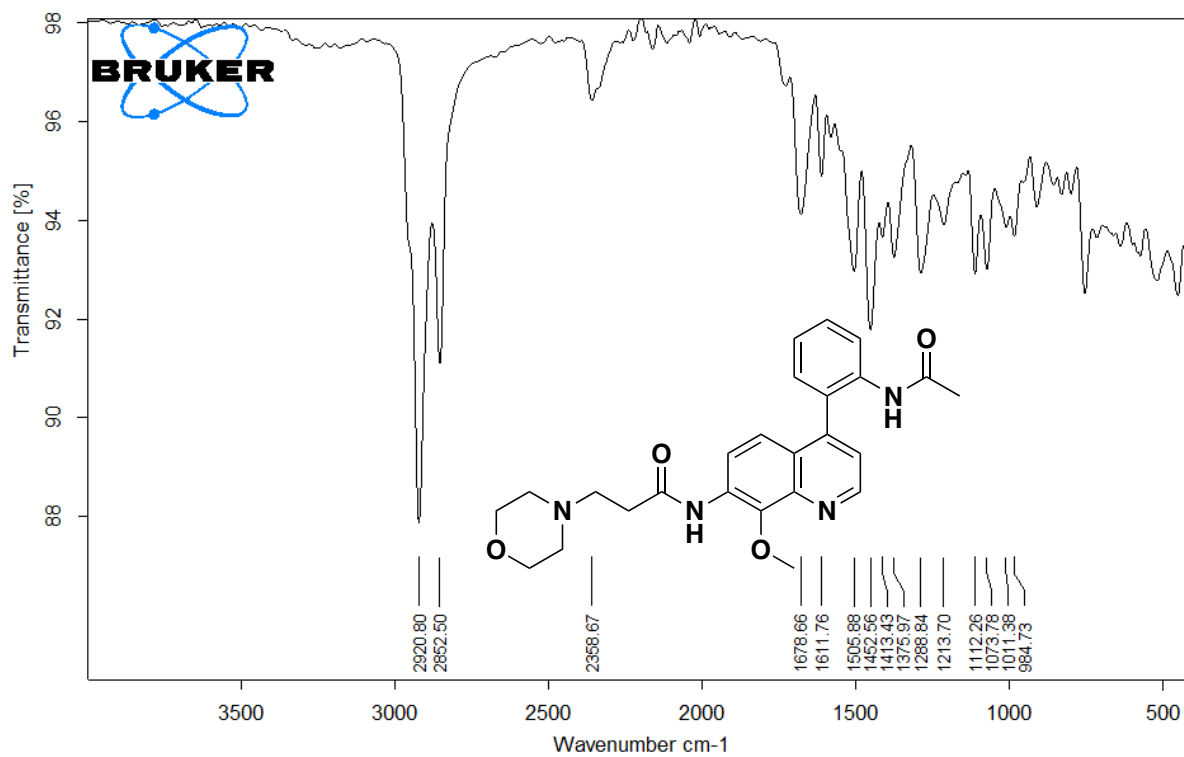

7-Acetamido-4-(phenyl)-8-hydroxyquinoline (28) in DMSO-d<sub>6</sub>

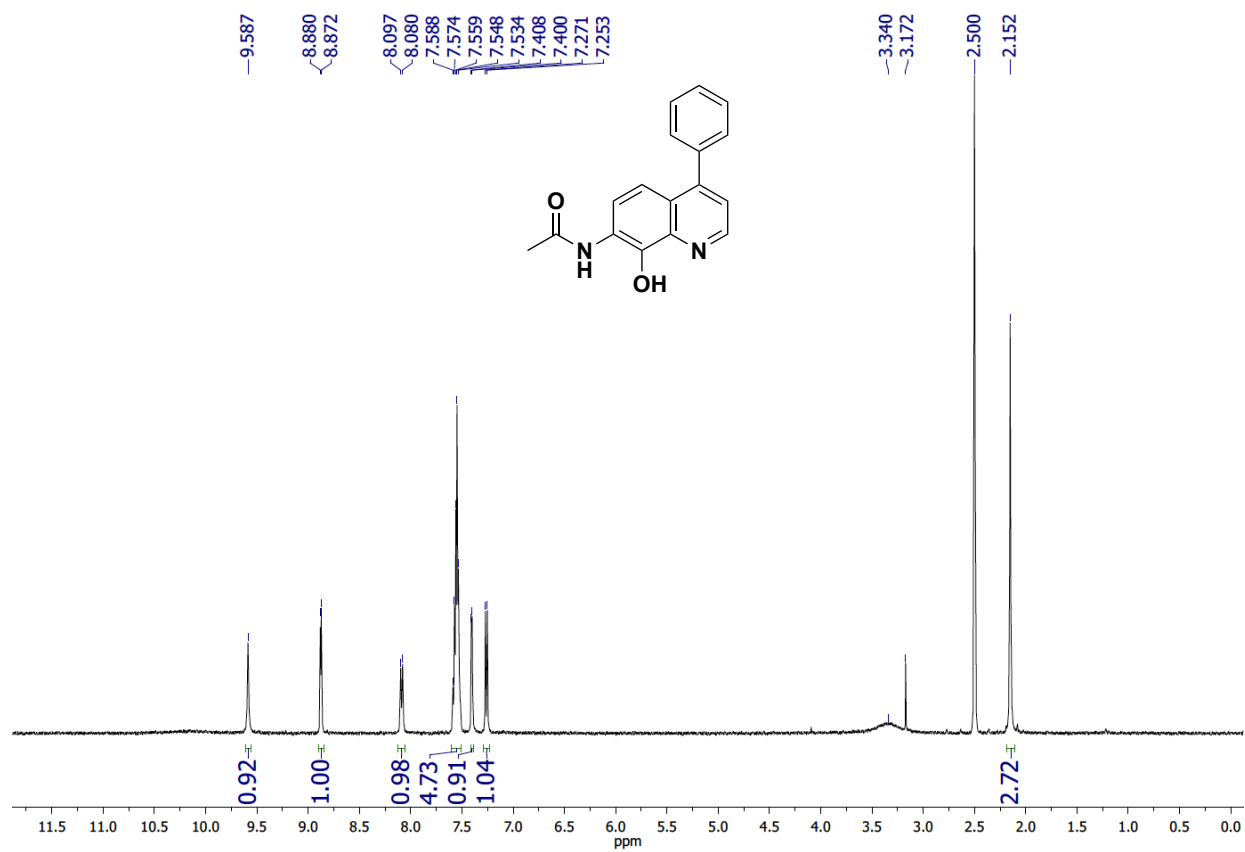



7-Acetamido-4-(phenyl)-8-hydroxyquinoline (28) in DMSO-d<sub>6</sub>

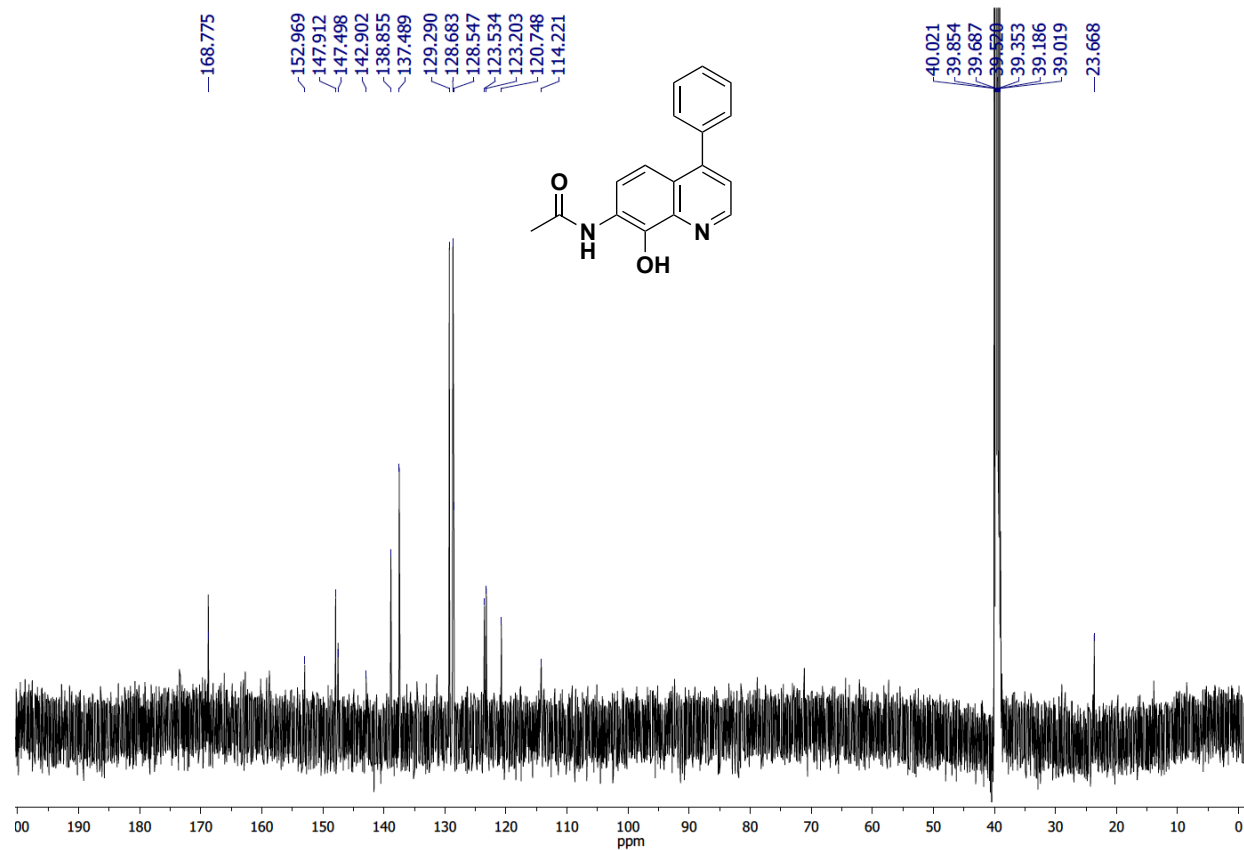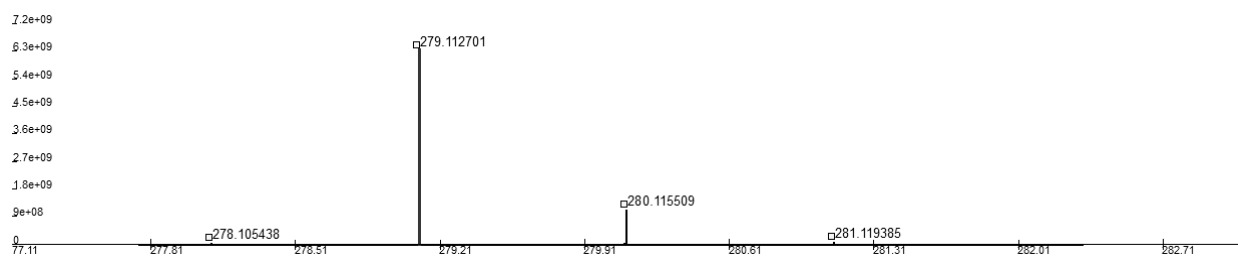

7-Acetamido-4-(phenyl)-8-hydroxyquinoline (28)

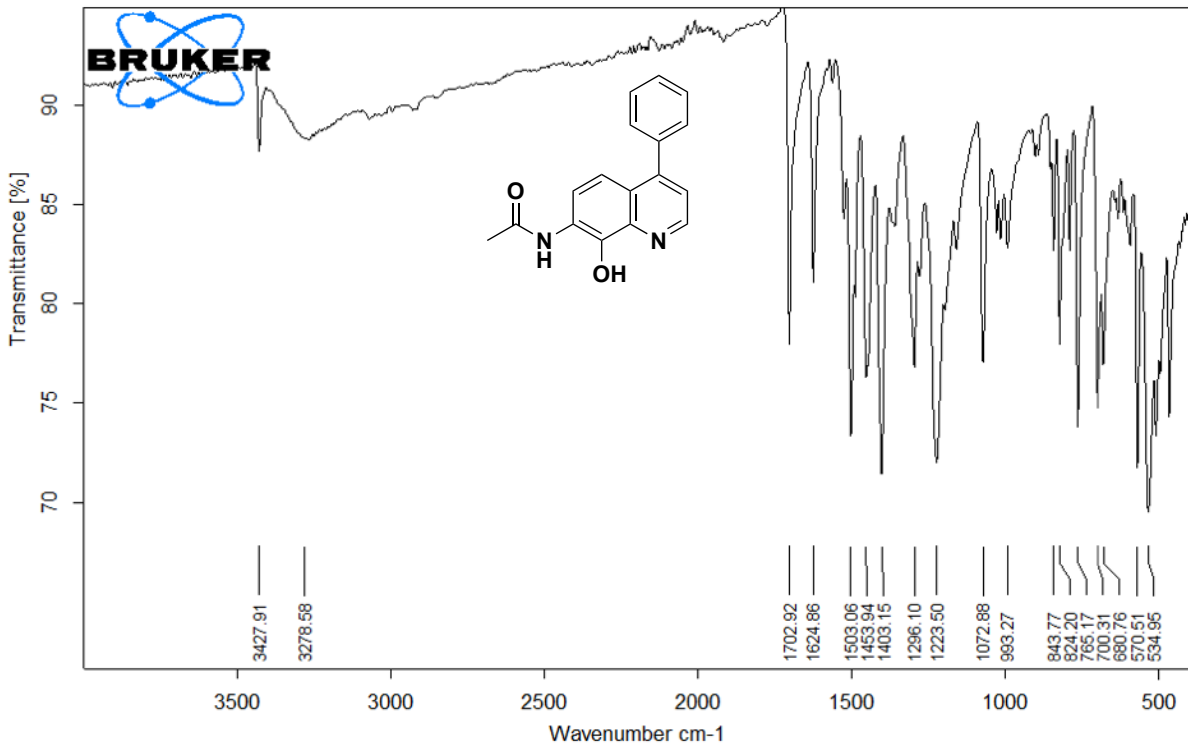

7-Acetamido-4-(3-fluorophenyl)-8-hydroxyquinoline (29) in DMSO-d<sub>6</sub>

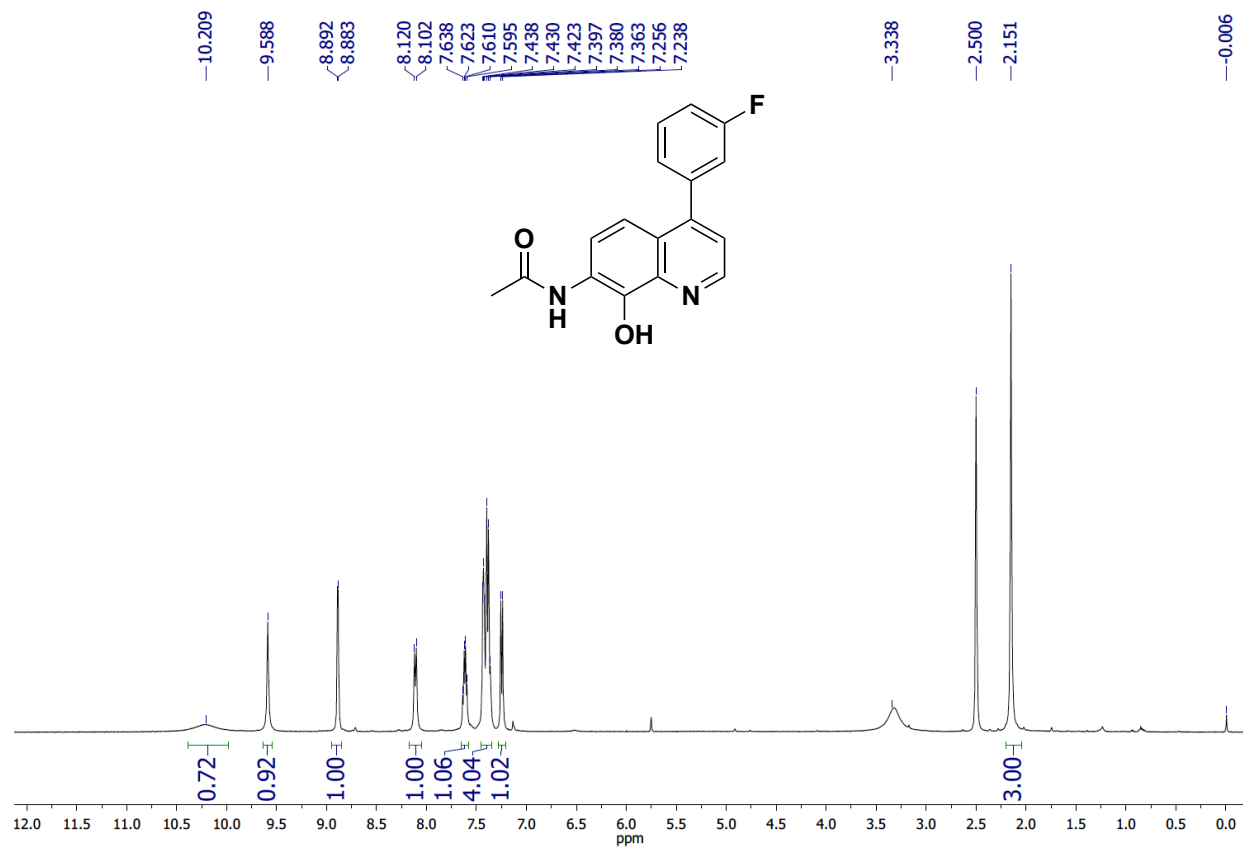

7-Acetamido-4-(3-fluorophenyl)-8-hydroxyquinoline (29) in DMSO-d<sub>6</sub>

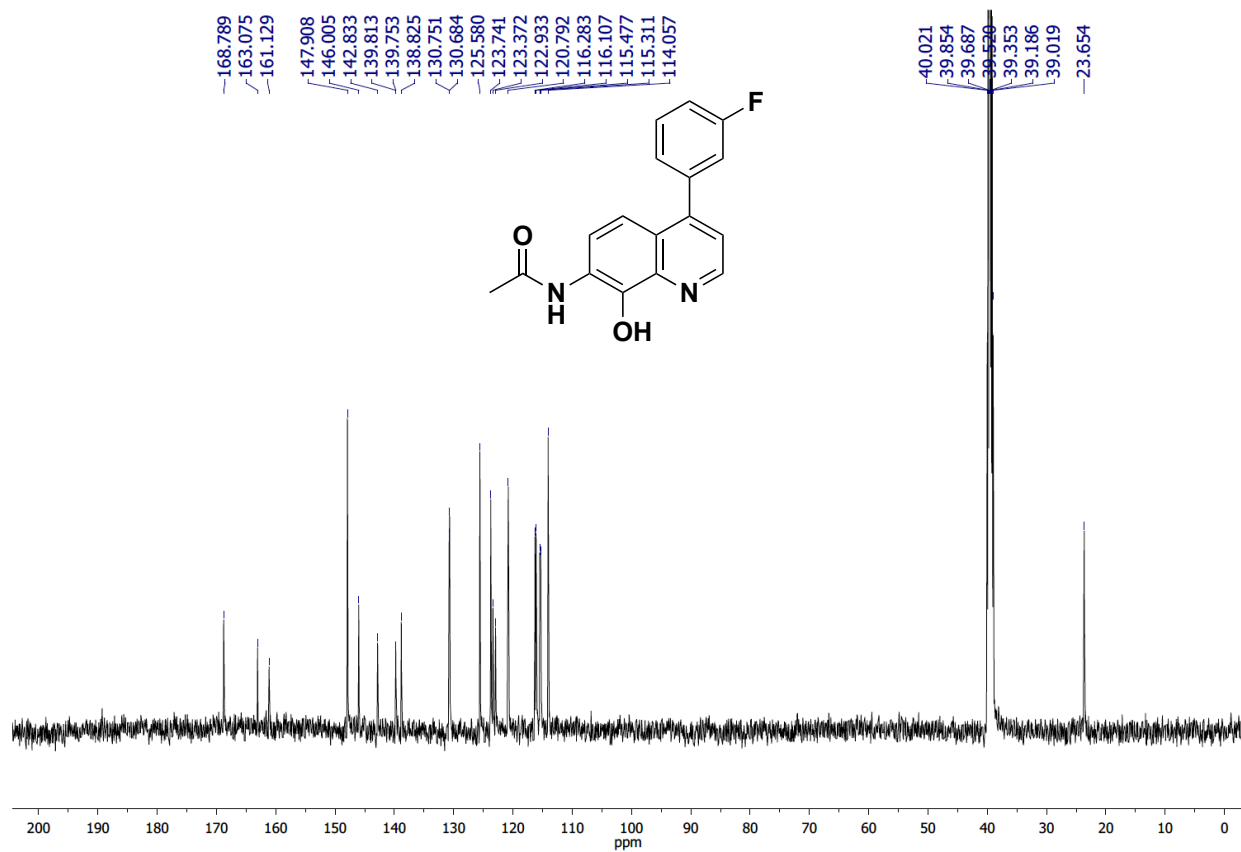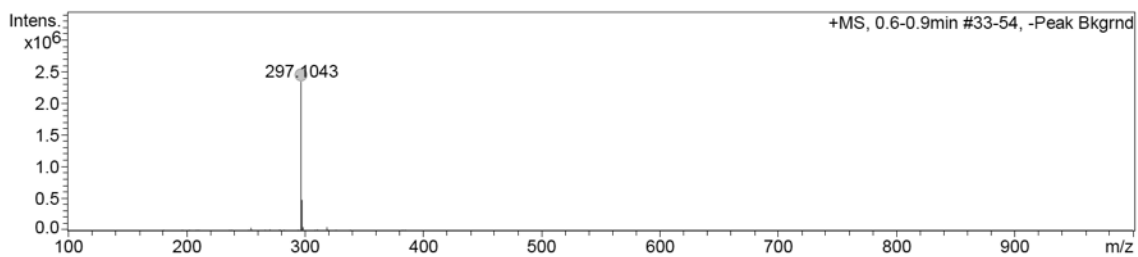

7-Acetamido-4-(3-fluorophenyl)-8-hydroxyquinoline (29)

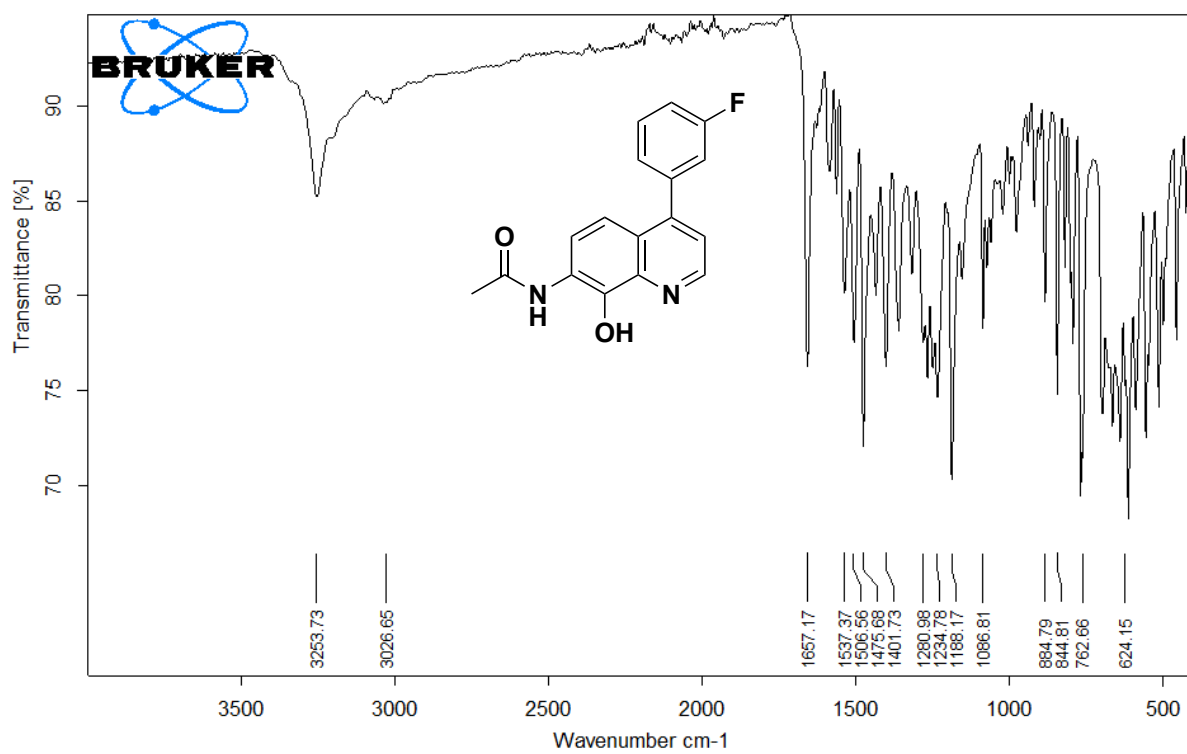

7-Acetamido-4-(4-fluorophenyl)-8-hydroxyquinoline (30) in DMSO-d<sub>6</sub>

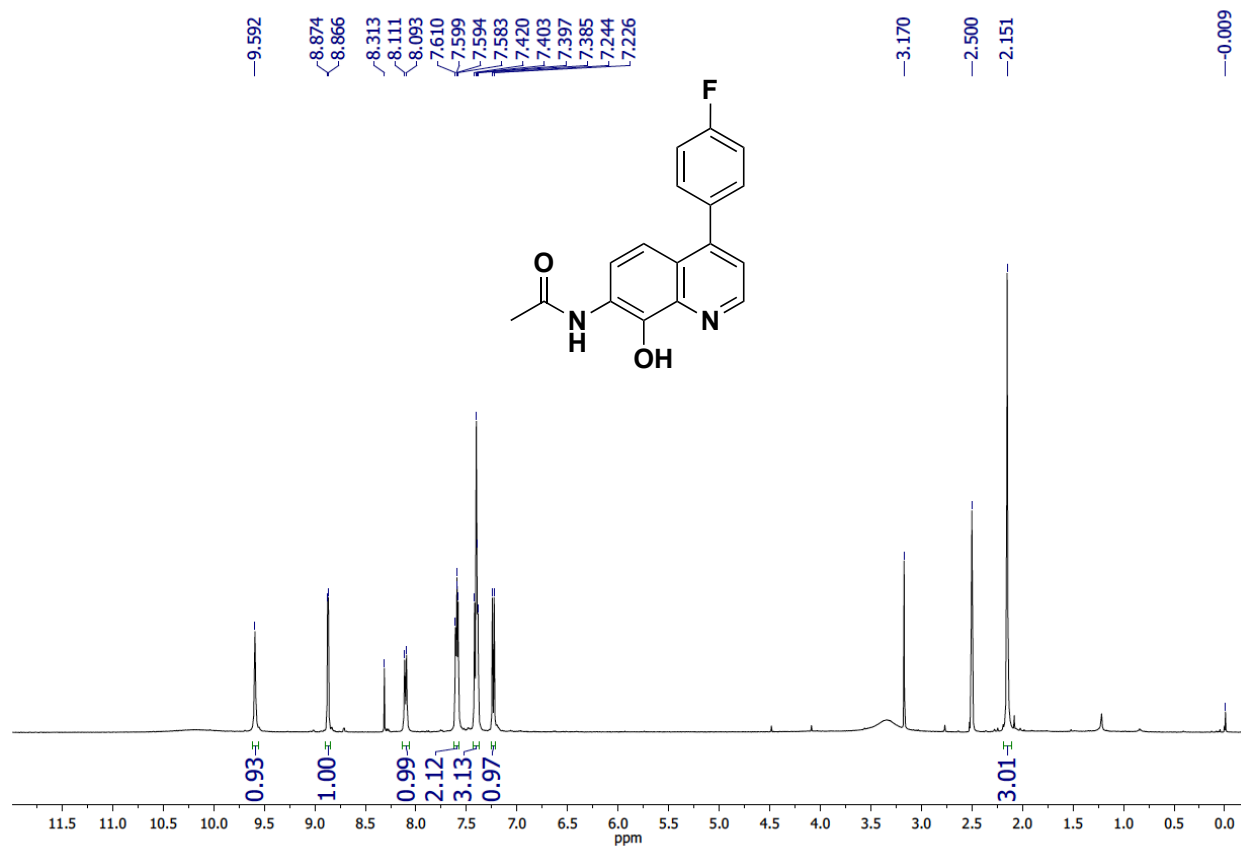

7-Acetamido-4-(4-fluorophenyl)-8-hydroxyquinoline (30) in DMSO-d<sub>6</sub>

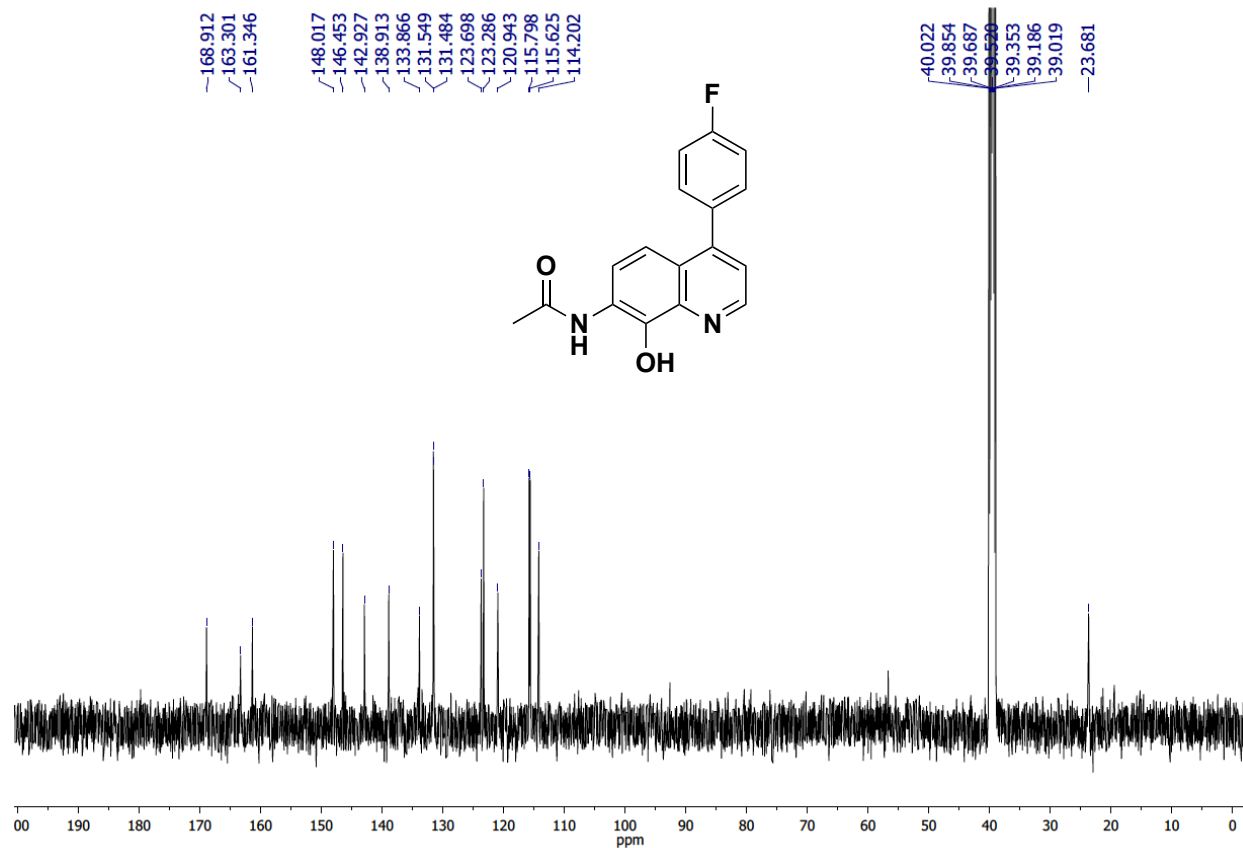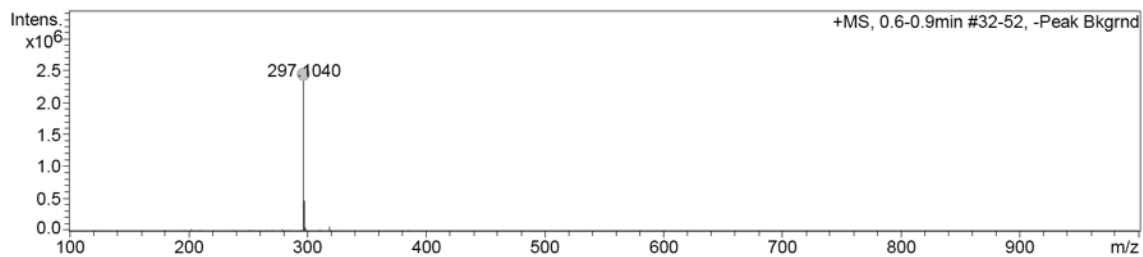

7-Acetamido-4-(4-fluorophenyl)-8-hydroxyquinoline (30)

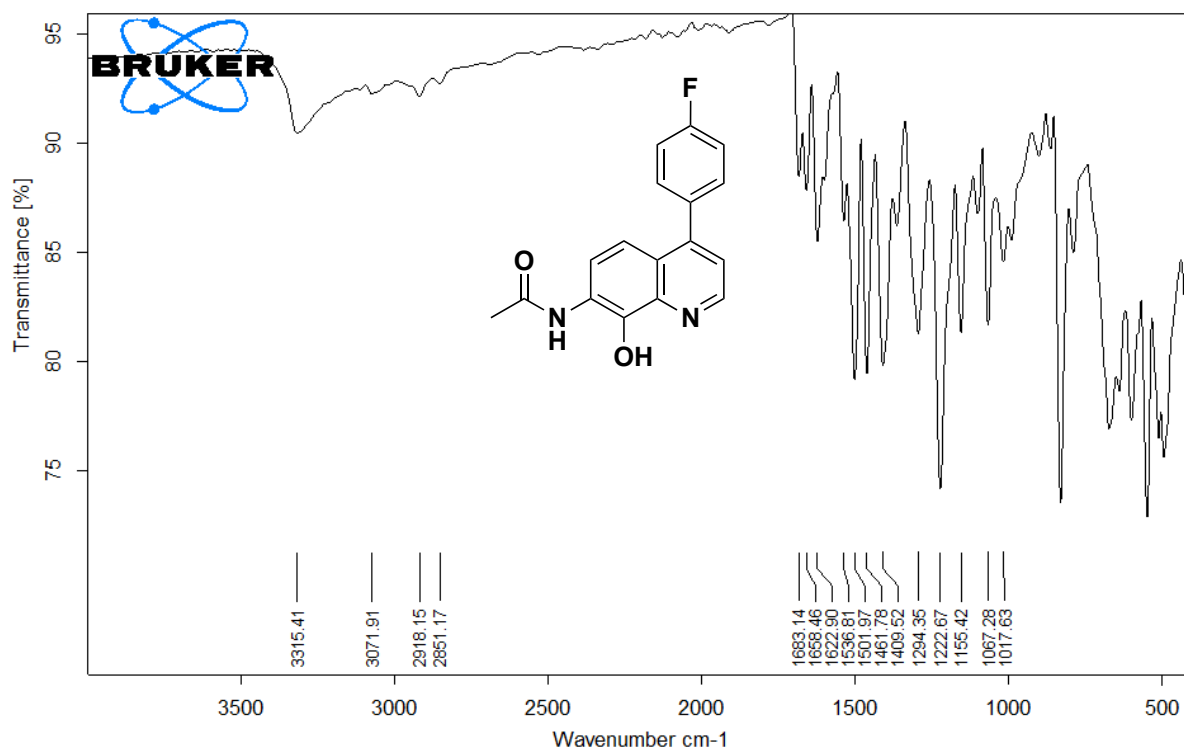



7-Acetamido-4-((3-trifluoromethyl)phenyl)-8-hydroxyquinoline (31) in DMSO-d<sub>6</sub>

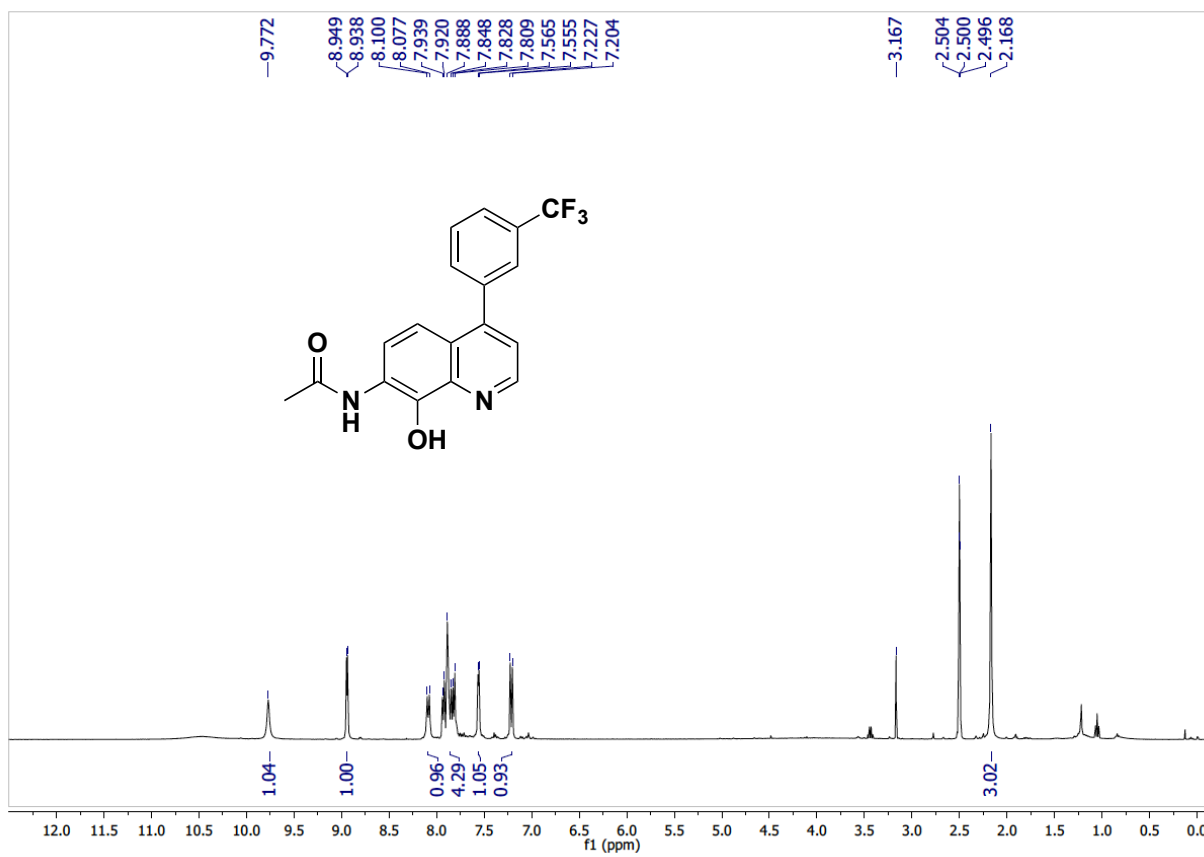

7-Acetamido-4-((3-trifluoromethyl)phenyl)-8-hydroxyquinoline (31) in DMSO-d<sub>6</sub>

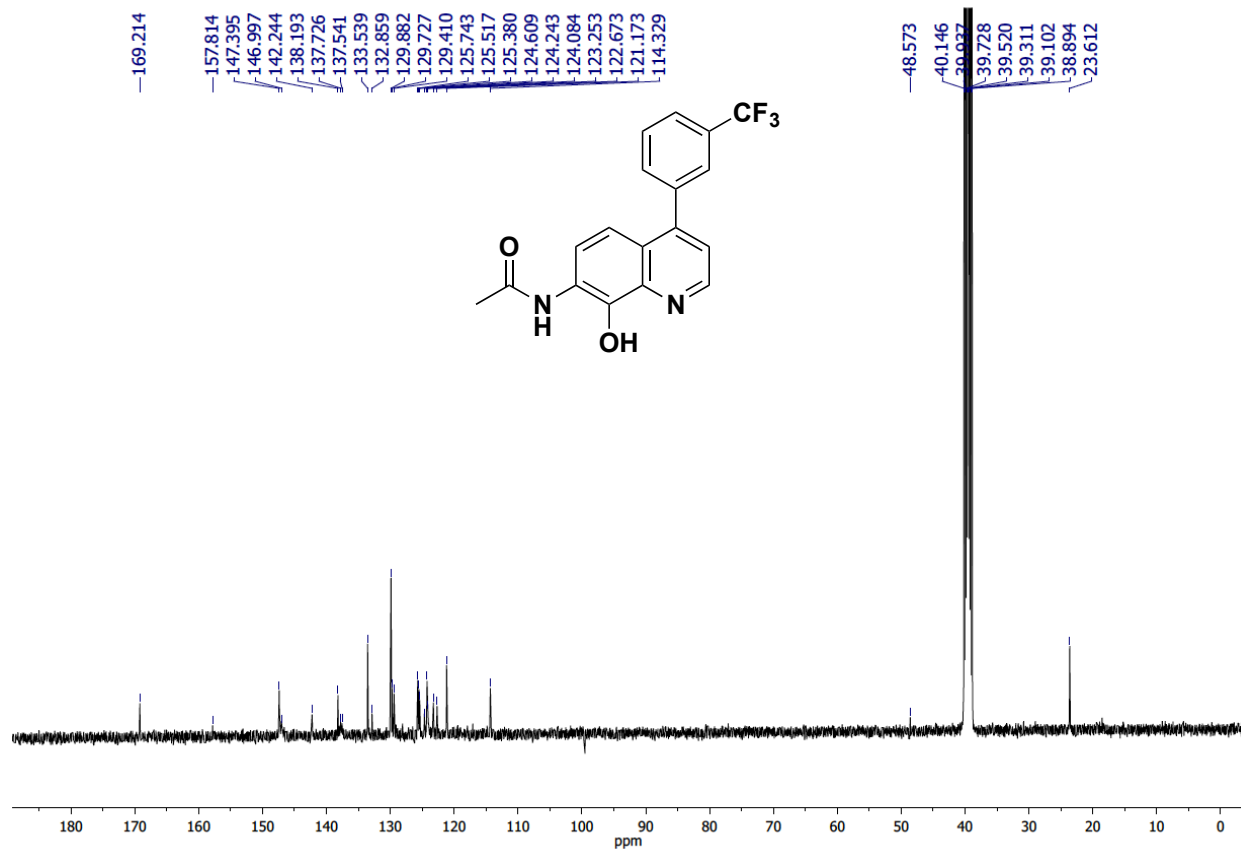

7-Acetamido-4-((3-trifluoromethyl)phenyl)-8-hydroxyquinoline (31)

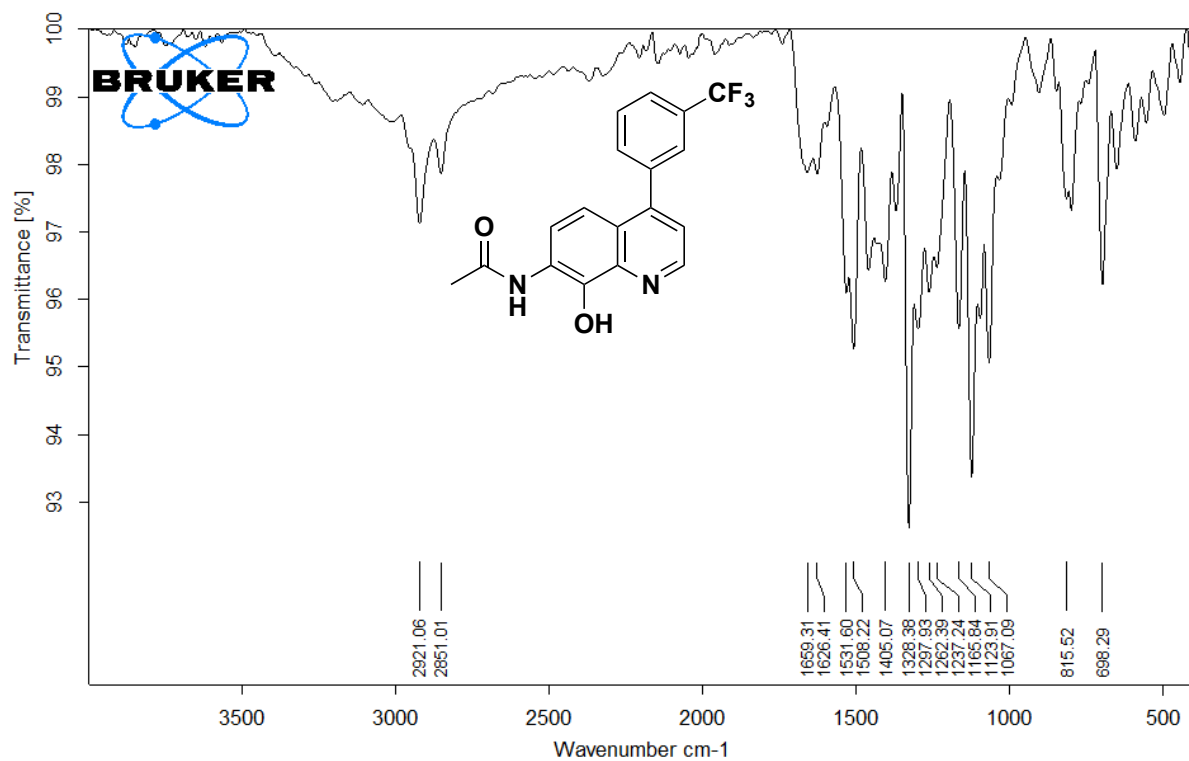

# 7-Acetamido-4-((3-trifluoromethyl)phenyl)-8-hydroxyquinoline (31)

0.10141667

Pusher Freq 22222

03032015-S 5 (0.101) AM (Cen,4, 80.00, Ar,10000.0,0.00,0.70); Sm (SG, 2x3.00); Cm (4:7)

1: TOF MS ES+  
8.25e4

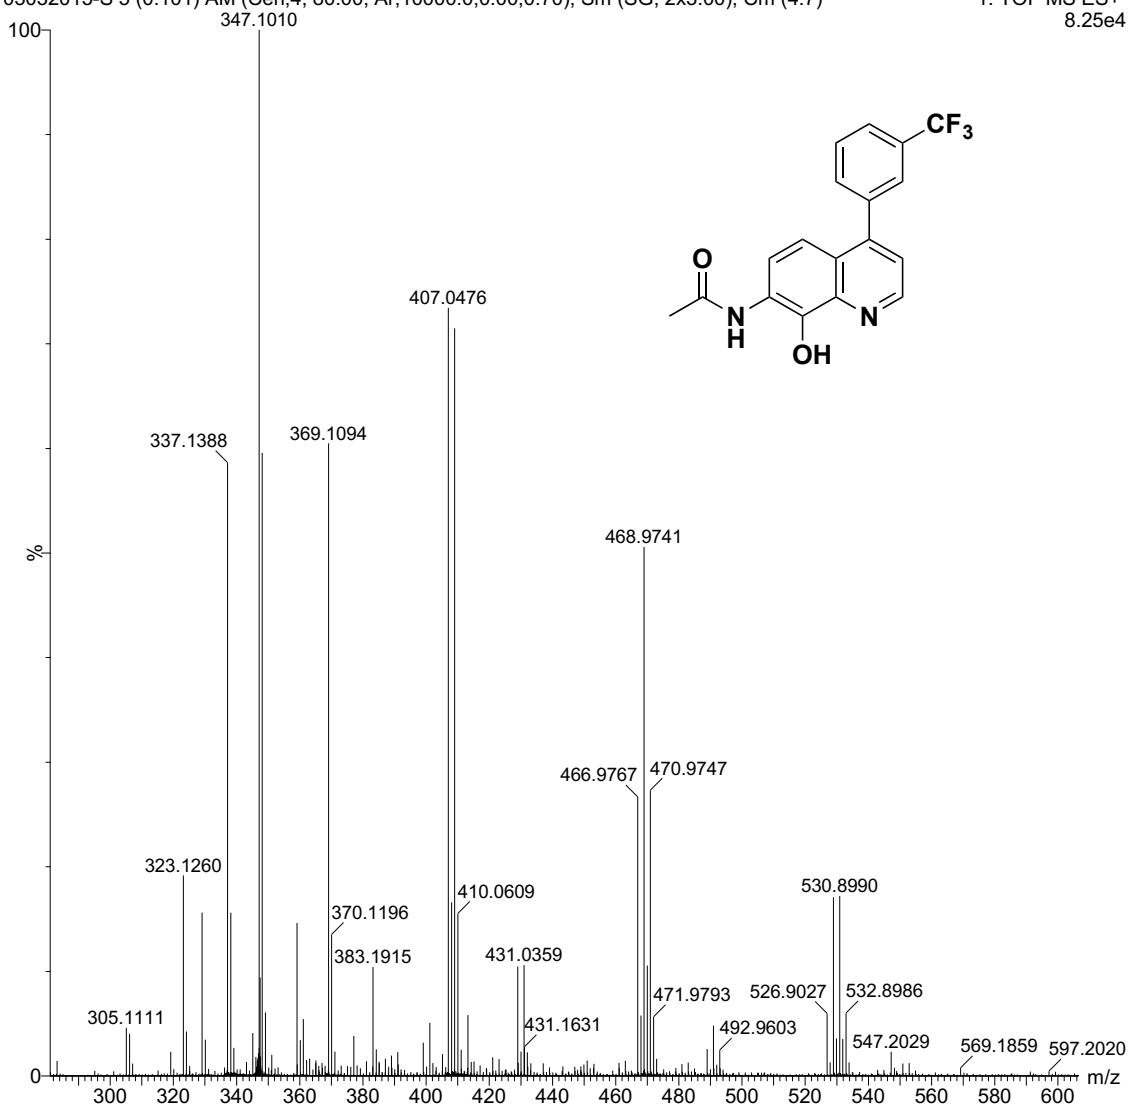

7-Acetamido-4-((4-trifluoromethyl)phenyl)-8-hydroxyquinoline (32) in DMSO-d<sub>6</sub>

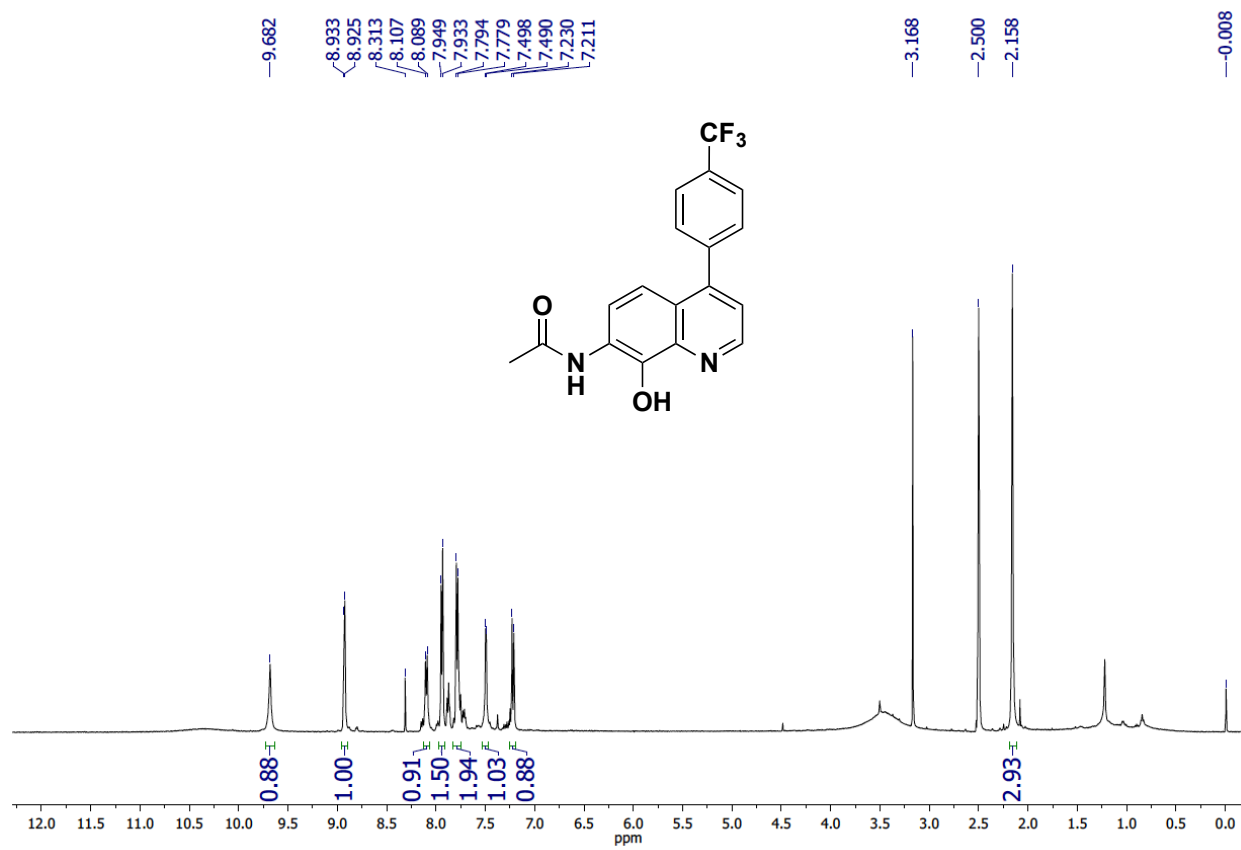

7-Acetamido-4-((4-trifluoromethyl)phenyl)-8-hydroxyquinoline (32) in DMSO-d<sub>6</sub>

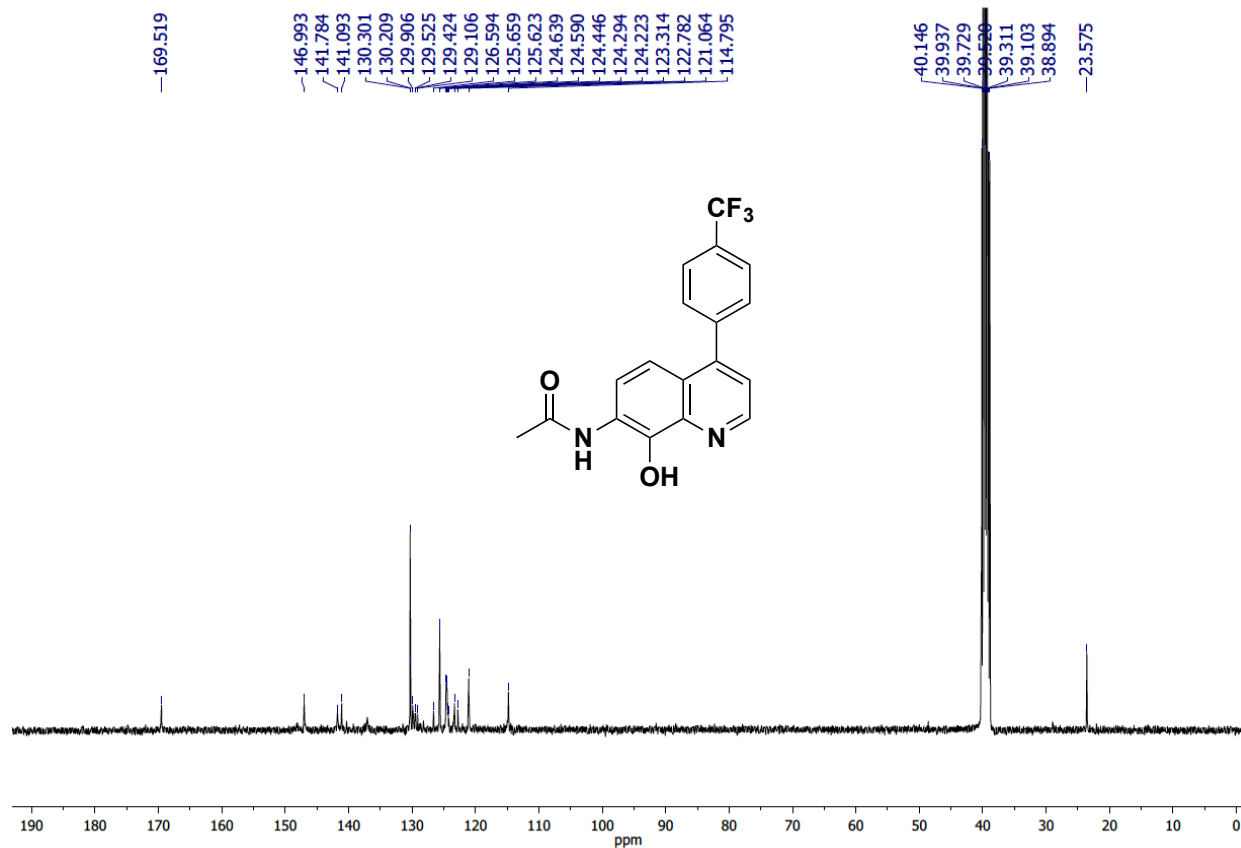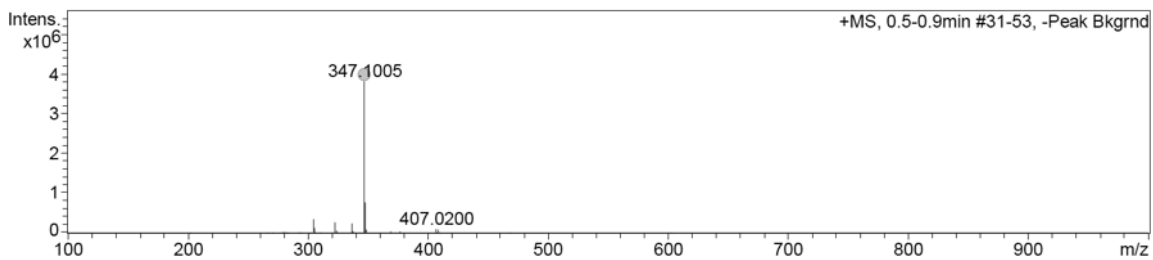

7-Acetamido-4-((4-trifluoromethyl)phenyl)-8-hydroxyquinoline (32)

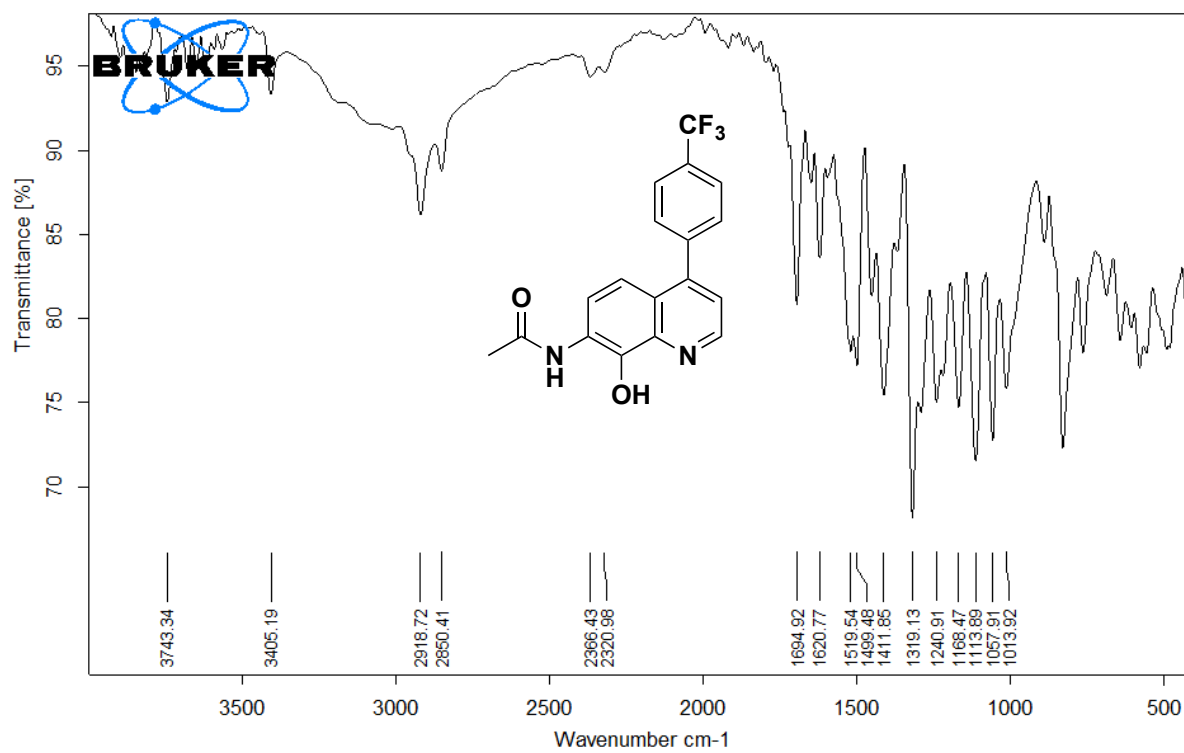

7-Acetamido-4-(3-hydroxyphenyl)-8-hydroxyquinoline (33) in DMSO-d<sub>6</sub>

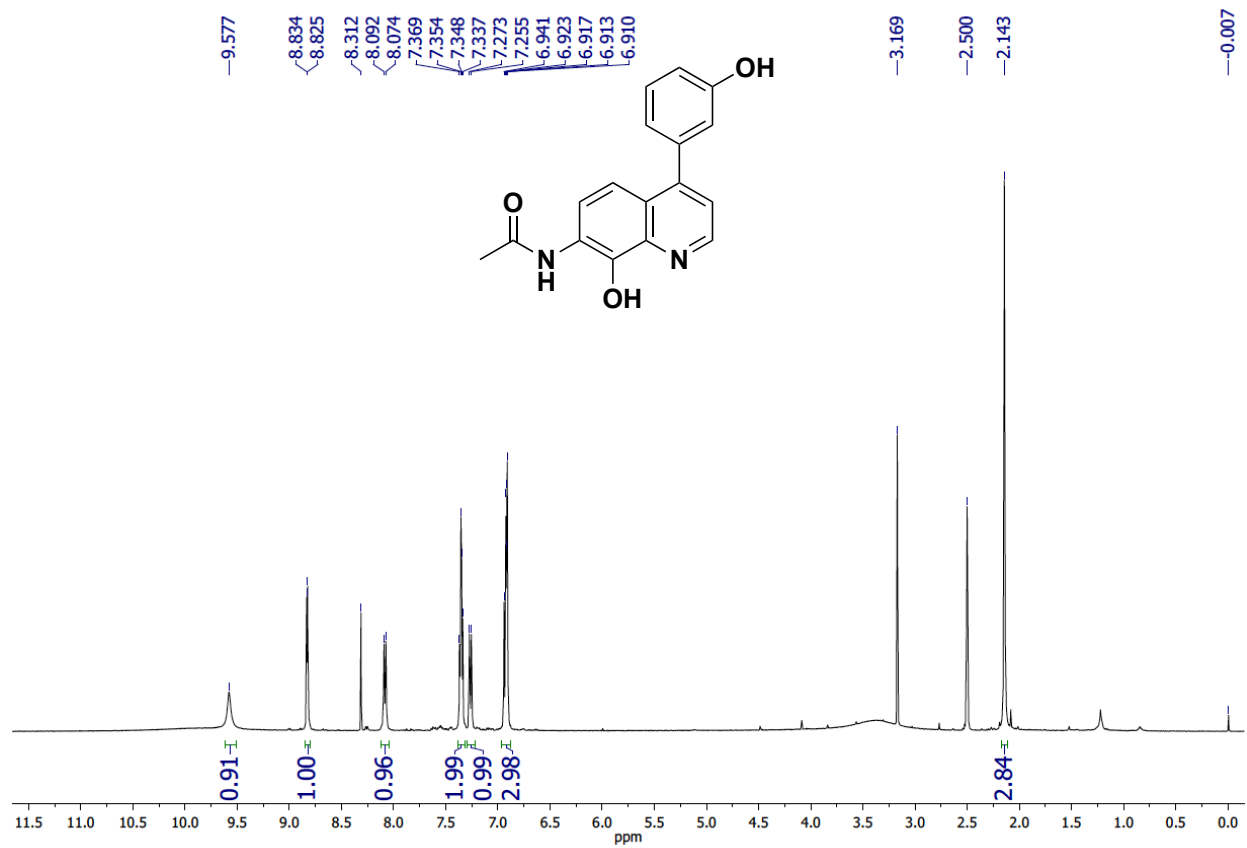



7-Acetamido-4-(3-hydroxyphenyl)-8-hydroxyquinoline (33) in DMSO-d<sub>6</sub>

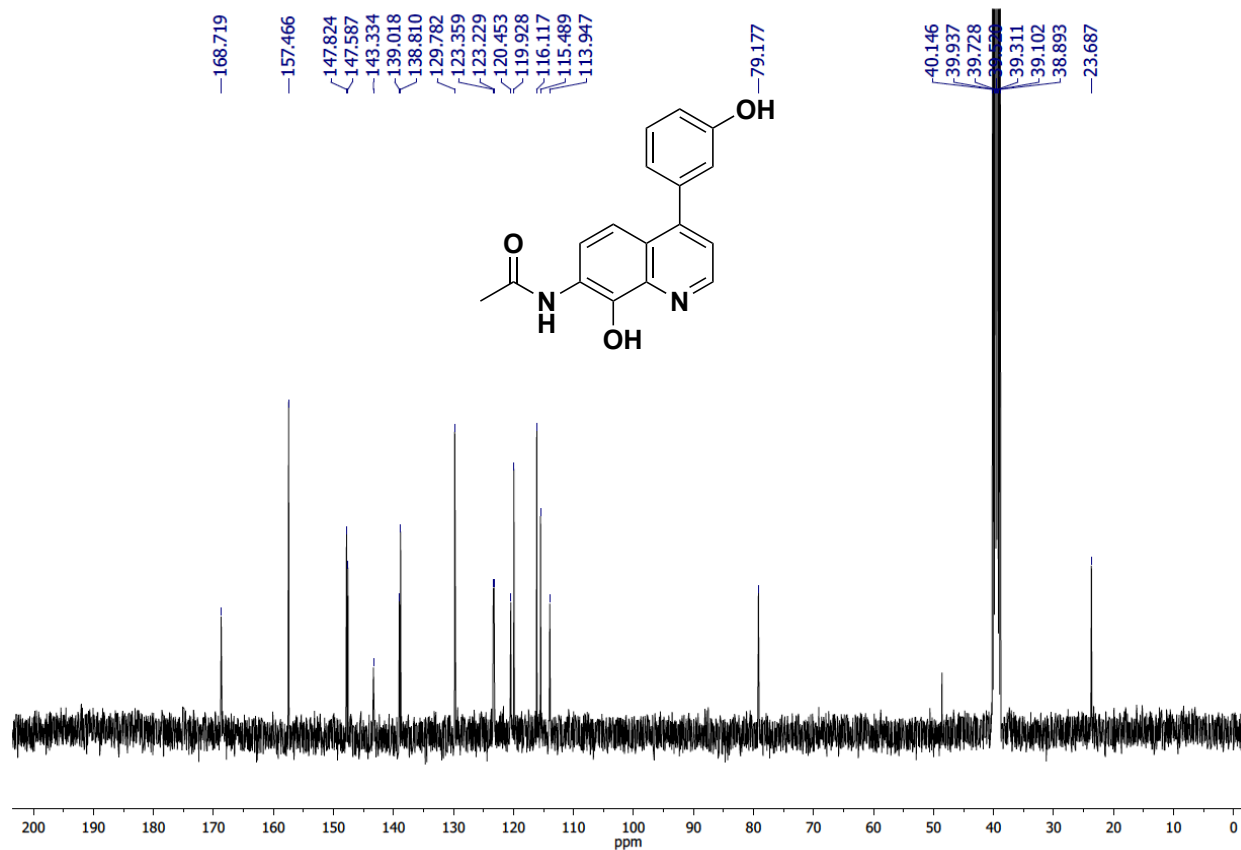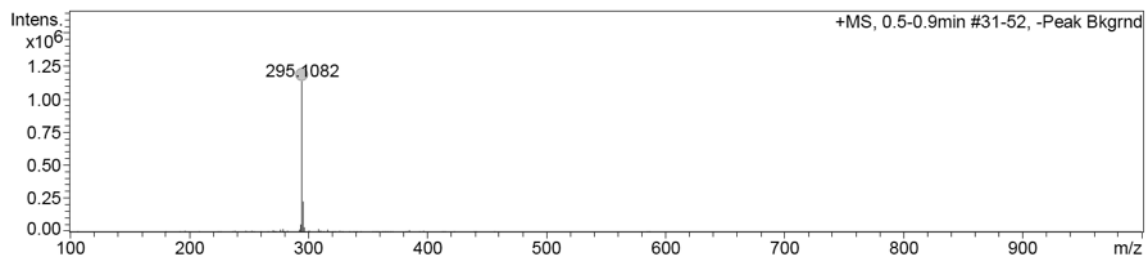

7-Acetamido-4-(3-hydroxyphenyl)-8-hydroxyquinoline (33)

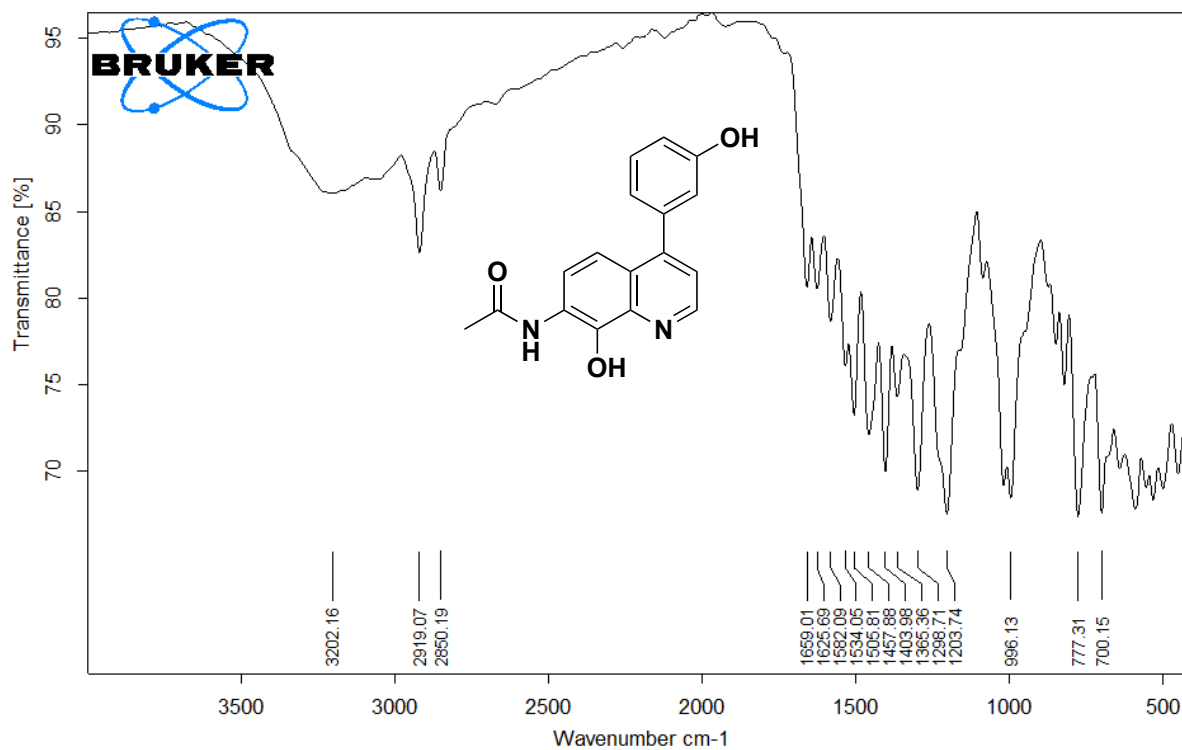

7-Acetamido-4-(2-acetamidophenyl)-8-hydroxyquinoline (34) in DMSO-d<sub>6</sub>

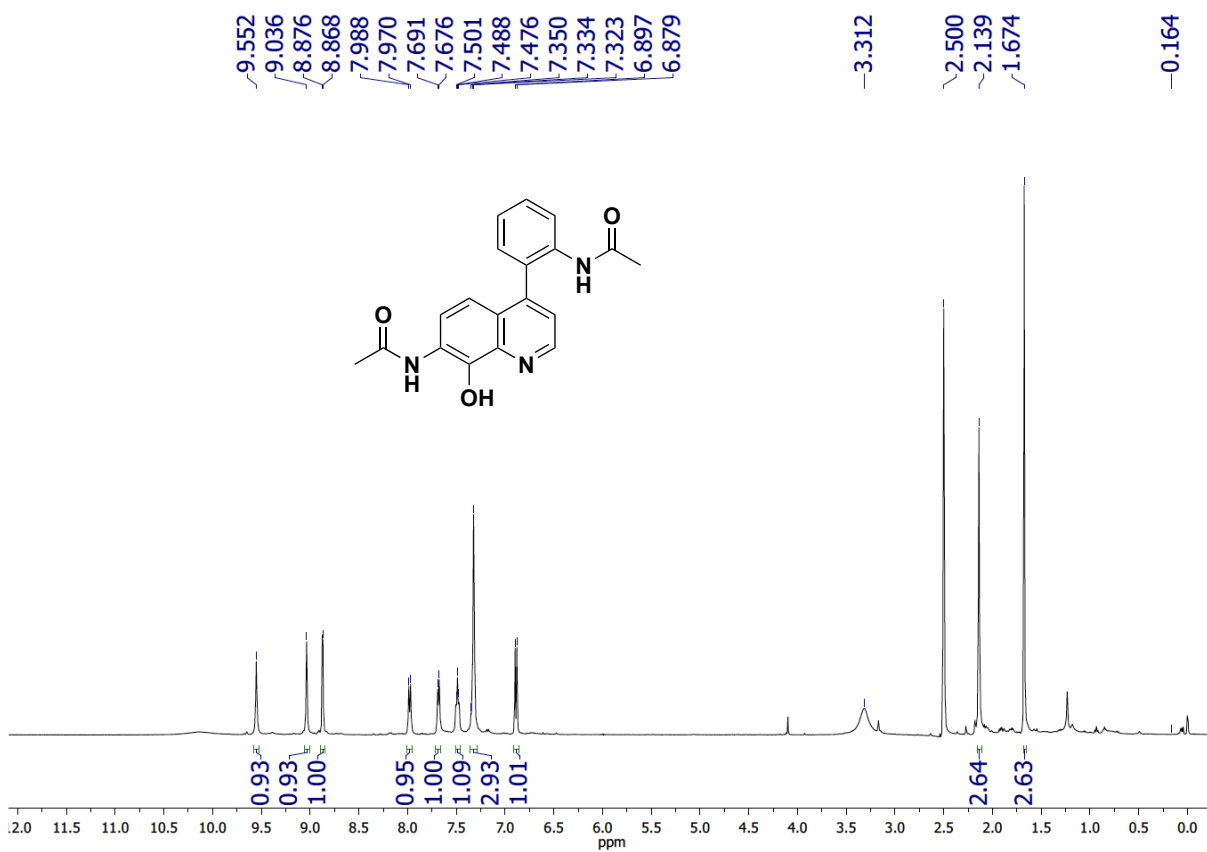

7-Acetamido-4-(2-acetamidophenyl)-8-hydroxyquinoline (34) in DMSO-d<sub>6</sub>

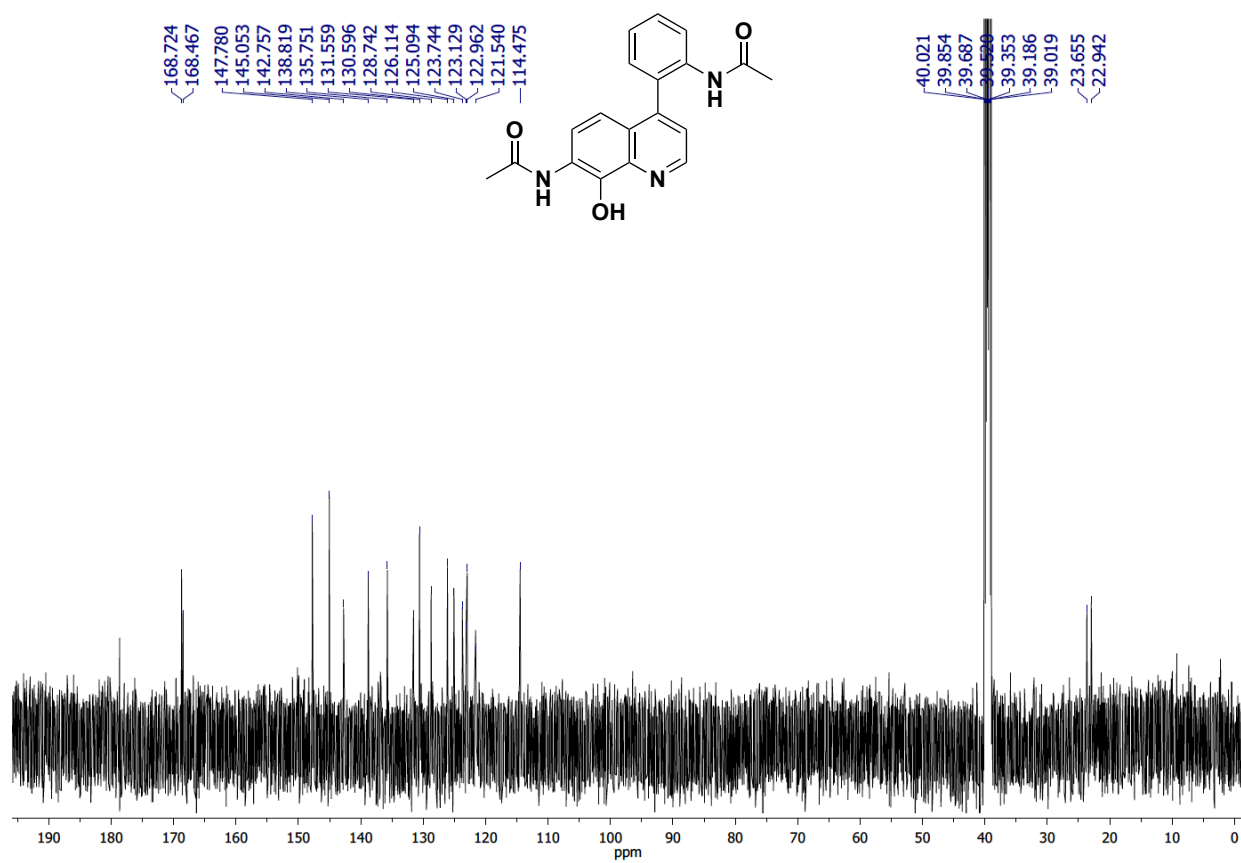

7-Acetamido-4-(2-acetamidophenyl)-8-hydroxyquinoline (34) in DMSO

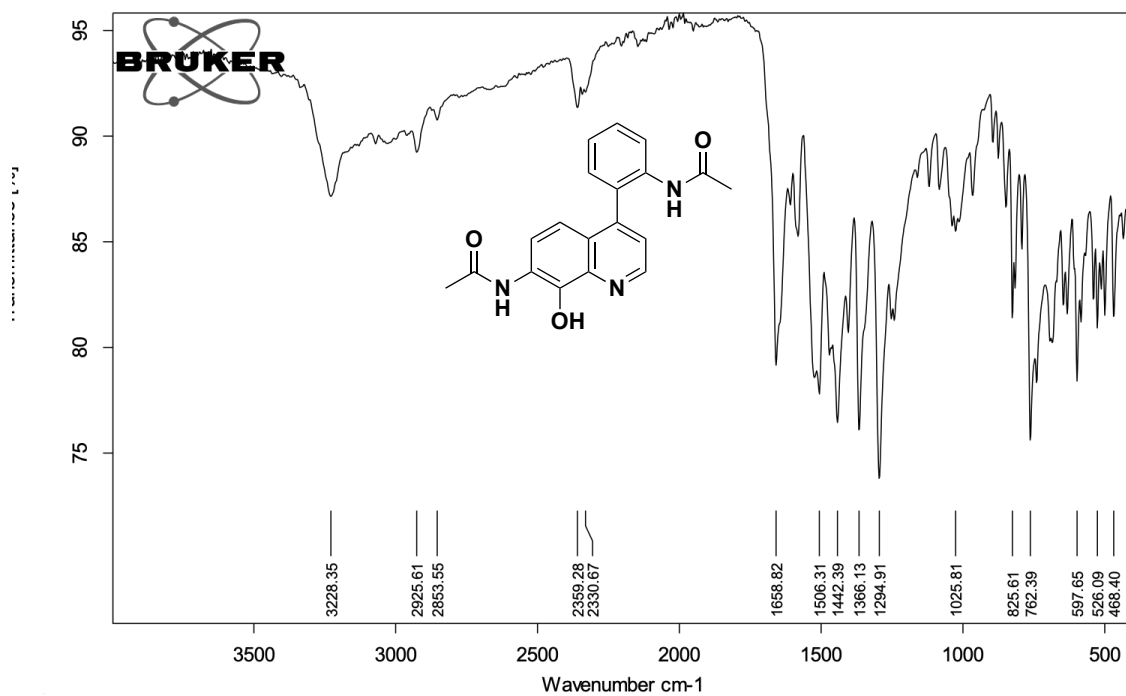

# 7-Acetamido-4-(2-acetamidophenyl)-8-hydroxyquinoline (34)

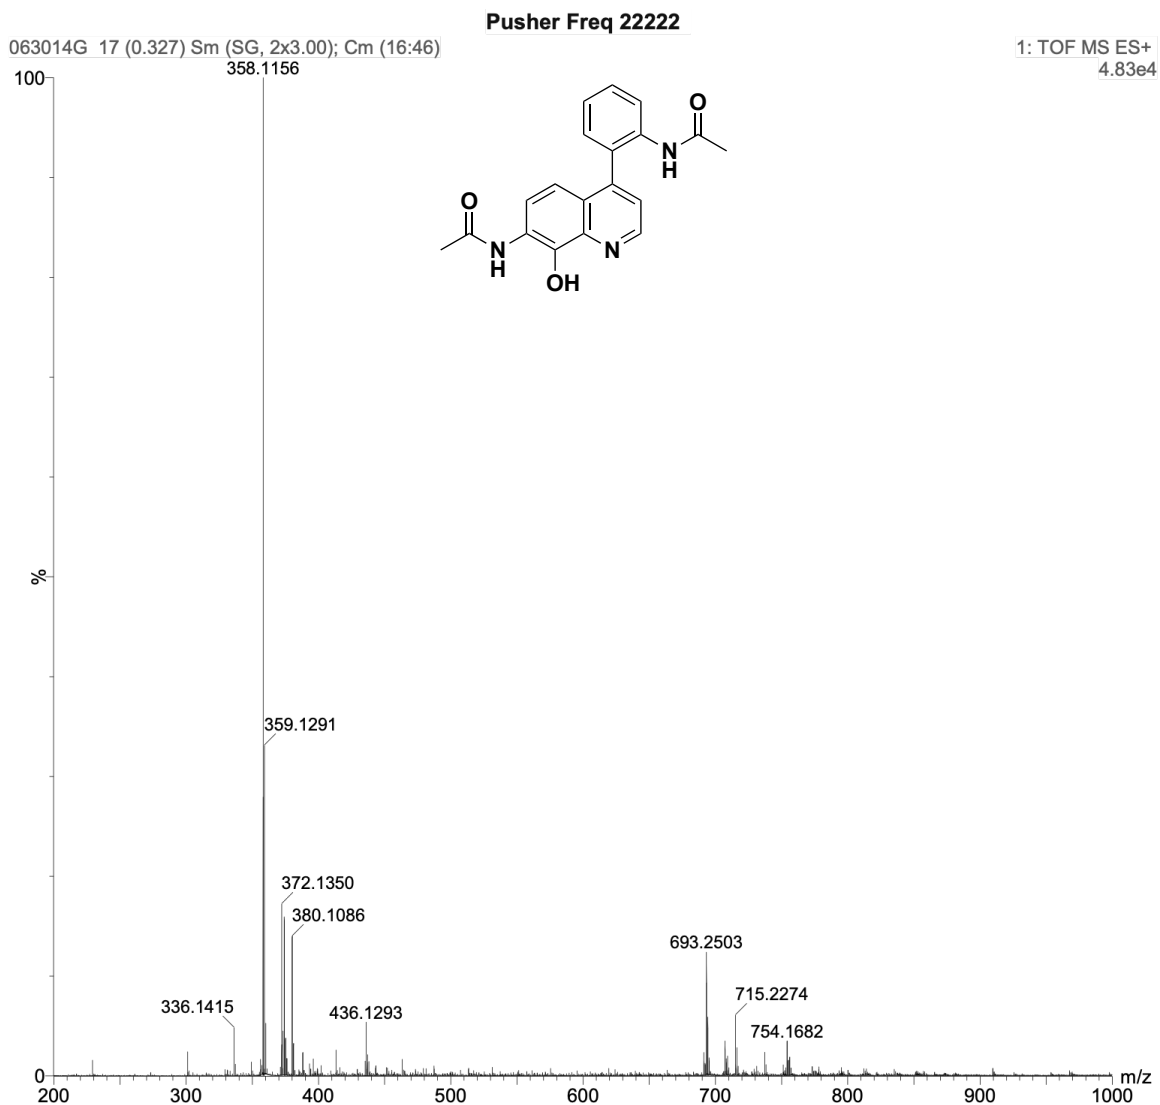

7-Acetamido-4-(4-acetamidophenyl)-8-hydroxyquinoline (35) in DMSO-d<sub>6</sub>

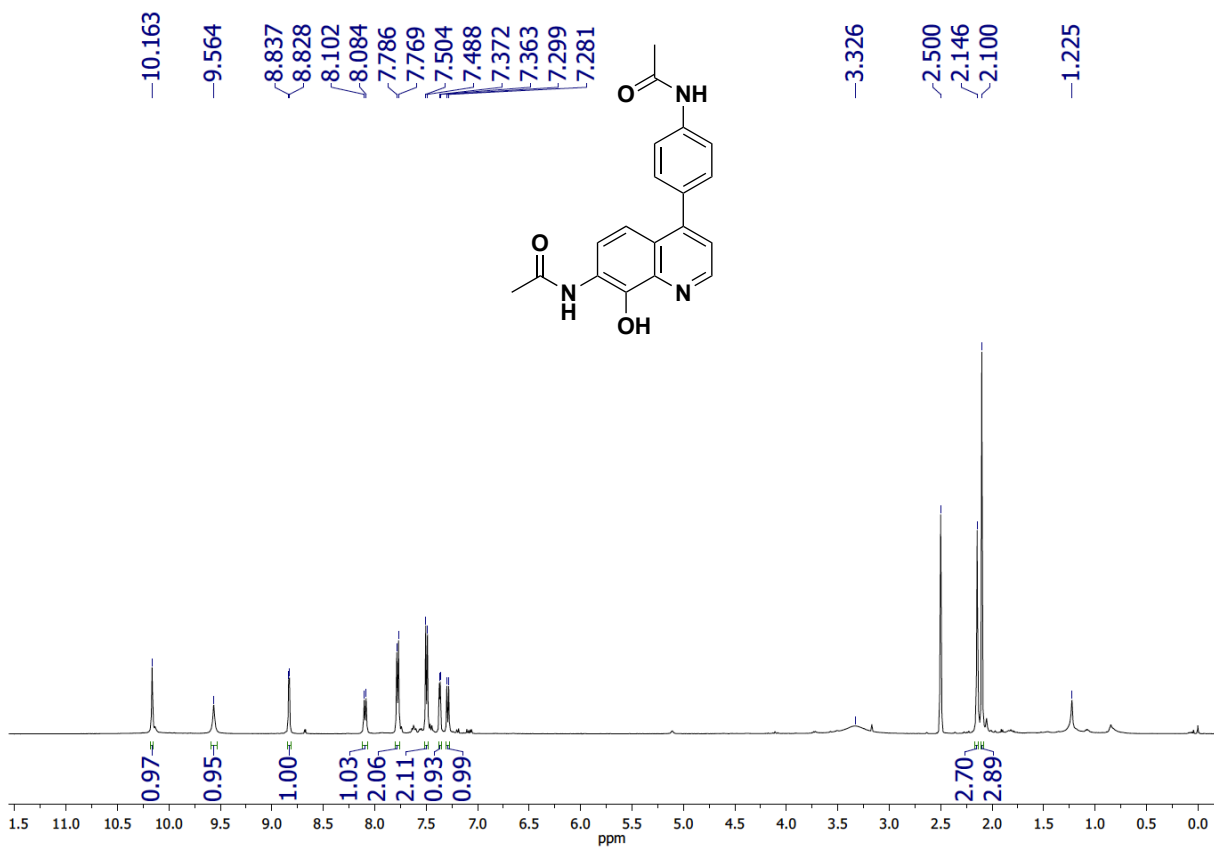

7-Acetamido-4-(4-acetamidophenyl)-8-hydroxyquinoline (35) in DMSO-d<sub>6</sub>

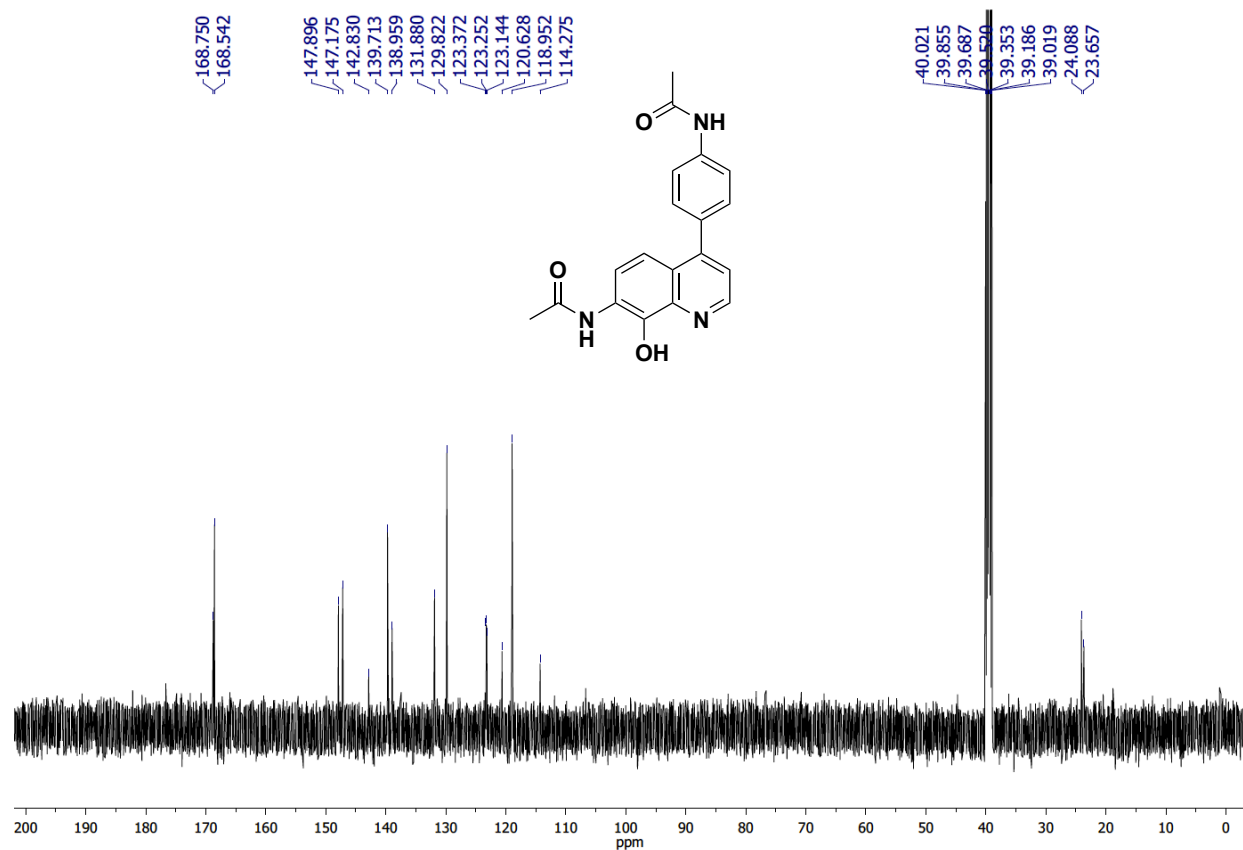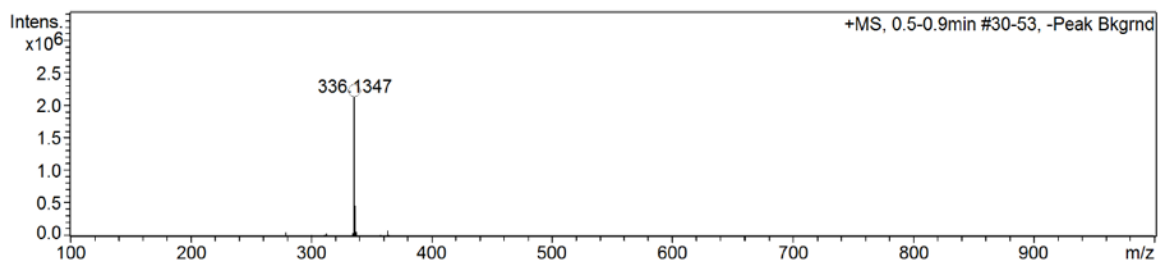



7-Acetamido-4-(4-acetamidophenyl)-8-hydroxyquinoline (35)

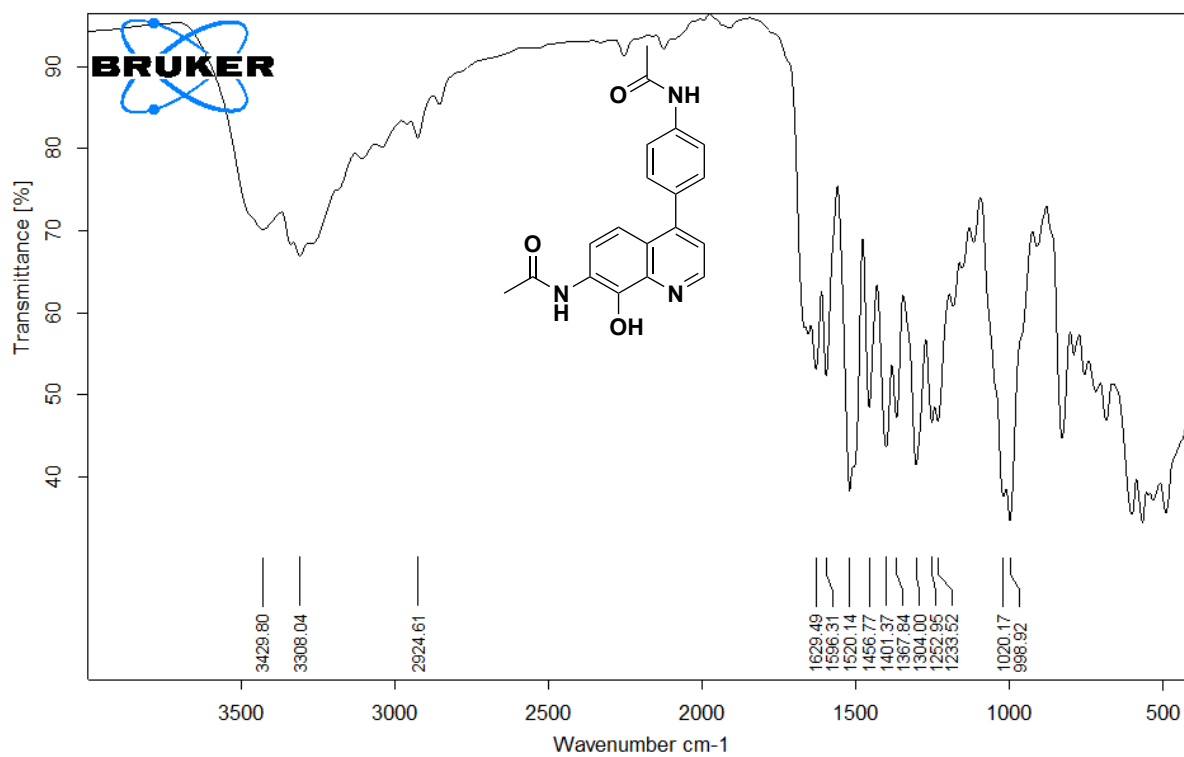

7-Acetamido-4-(3-acetamidophenyl)-8-hydroxyquinoline (36) in DMSO-d<sub>6</sub>

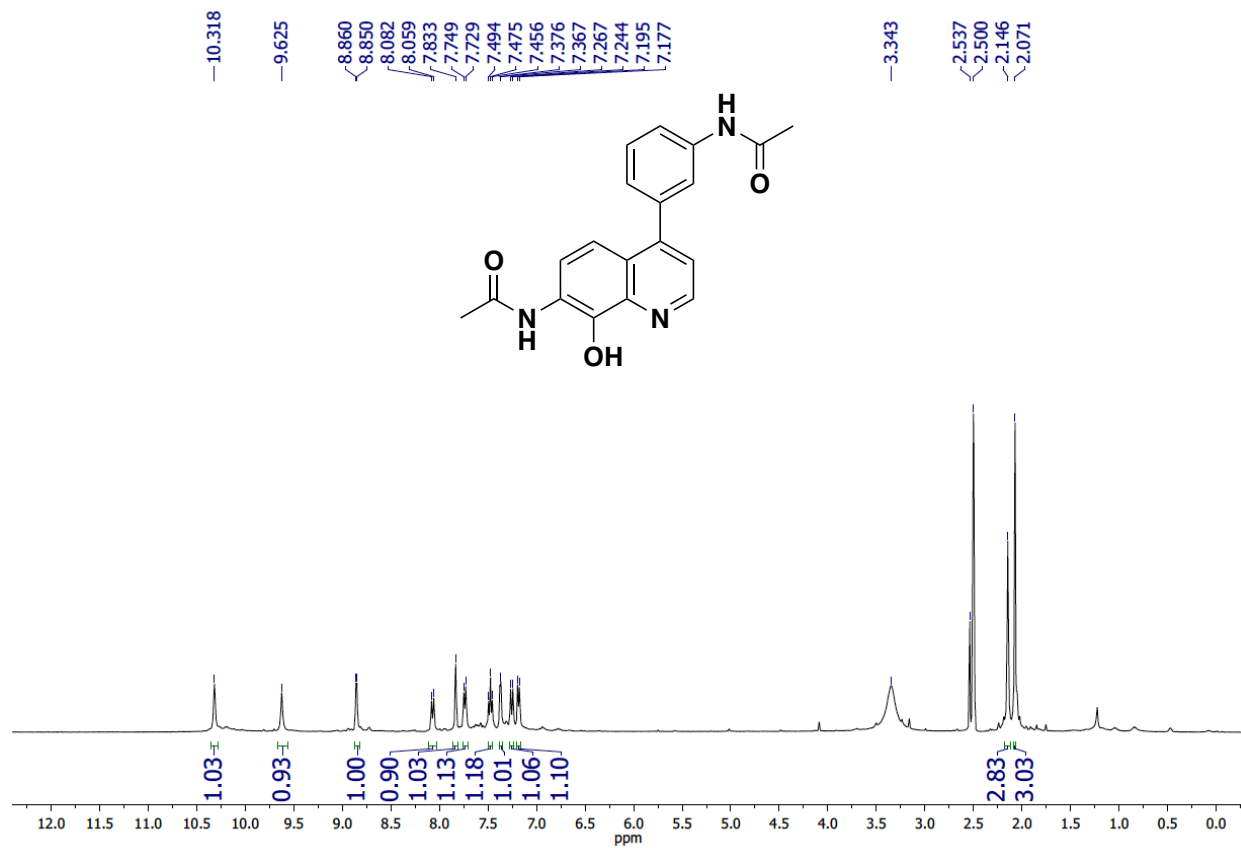

7-Acetamido-4-(3-acetamidophenyl)-8-hydroxyquinoline (36) in DMSO-d<sub>6</sub>

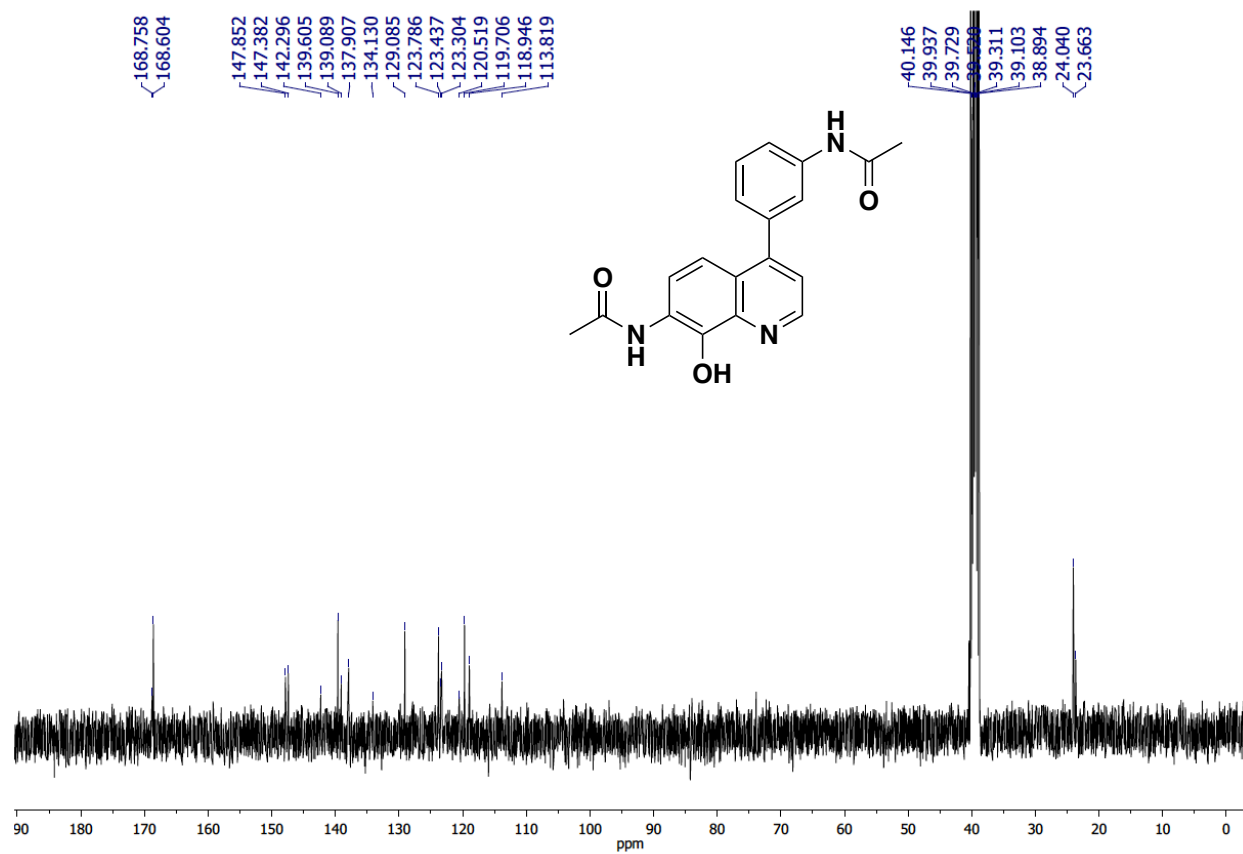

7-Acetamido-4-(3-acetamidophenyl)-8-hydroxyquinoline (36)

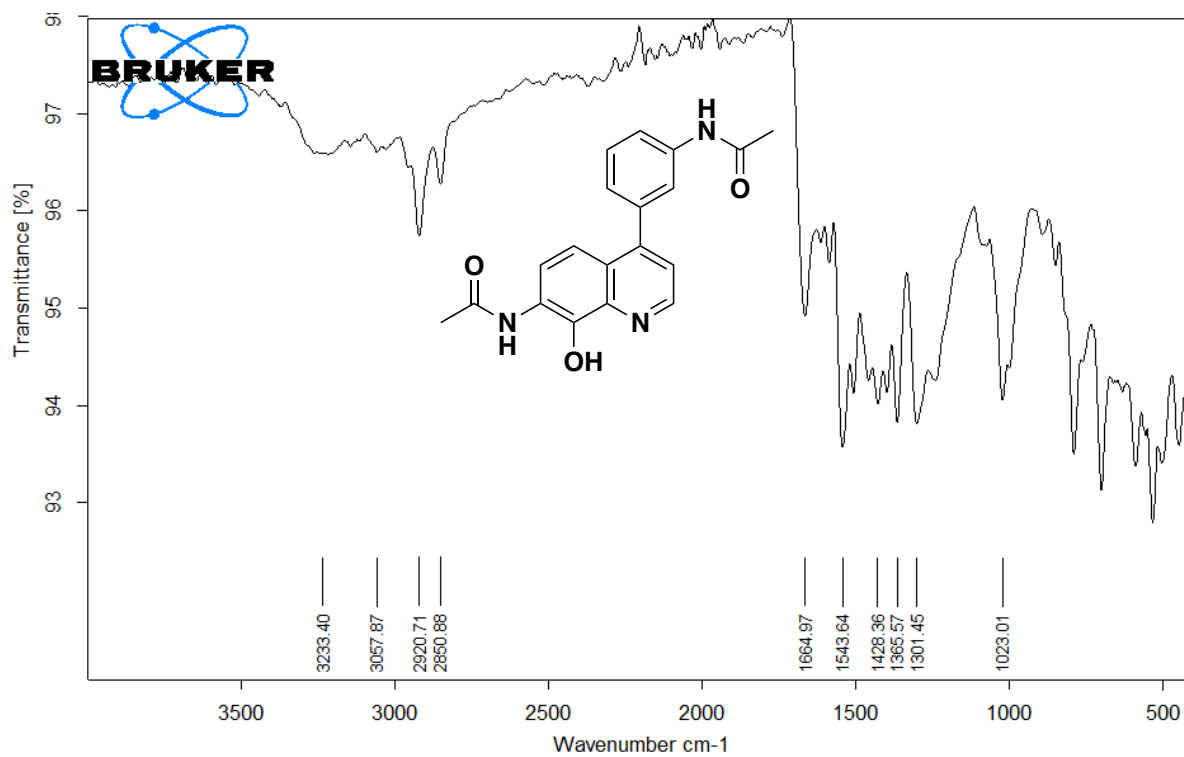

# 7-Acetamido-4-(3-acetamidophenyl)-8-hydroxyquinoline (36)

0.08265000

Pusher Freq 22222

03032015-O 4 (0.083) AM (Cen,4, 80.00, Ar,10000.0,0.00,0.70); Sm (SG, 2x3.00); Cm (4:11)

1: TOF MS ES+  
1.75e5

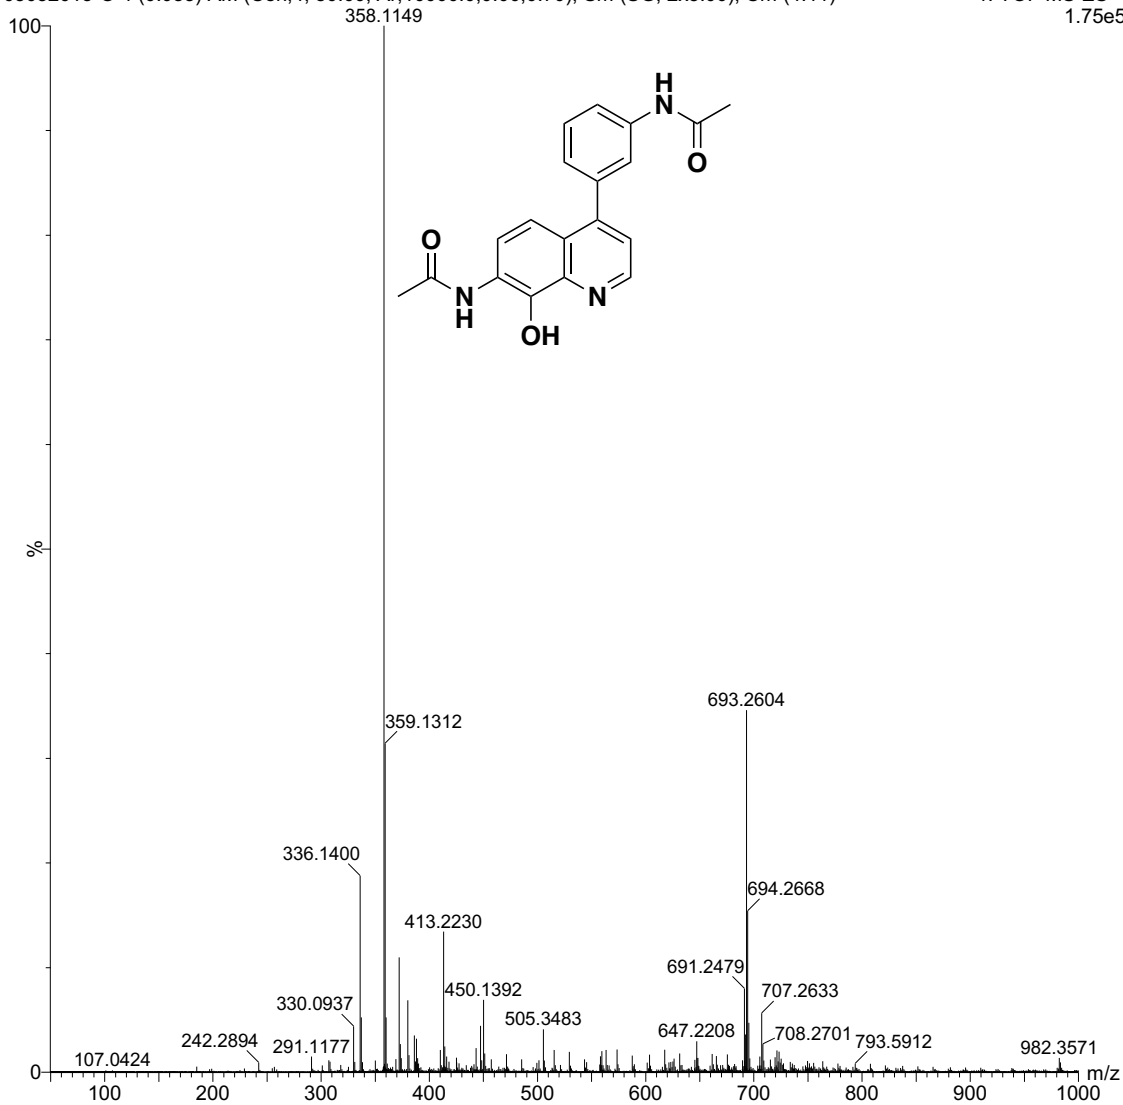

7-Acetamido-4-(2-hydroxy-(5-trifluoromethyl)phenyl)-8-hydroxyquinoline (37) in DMSO-d<sub>6</sub>

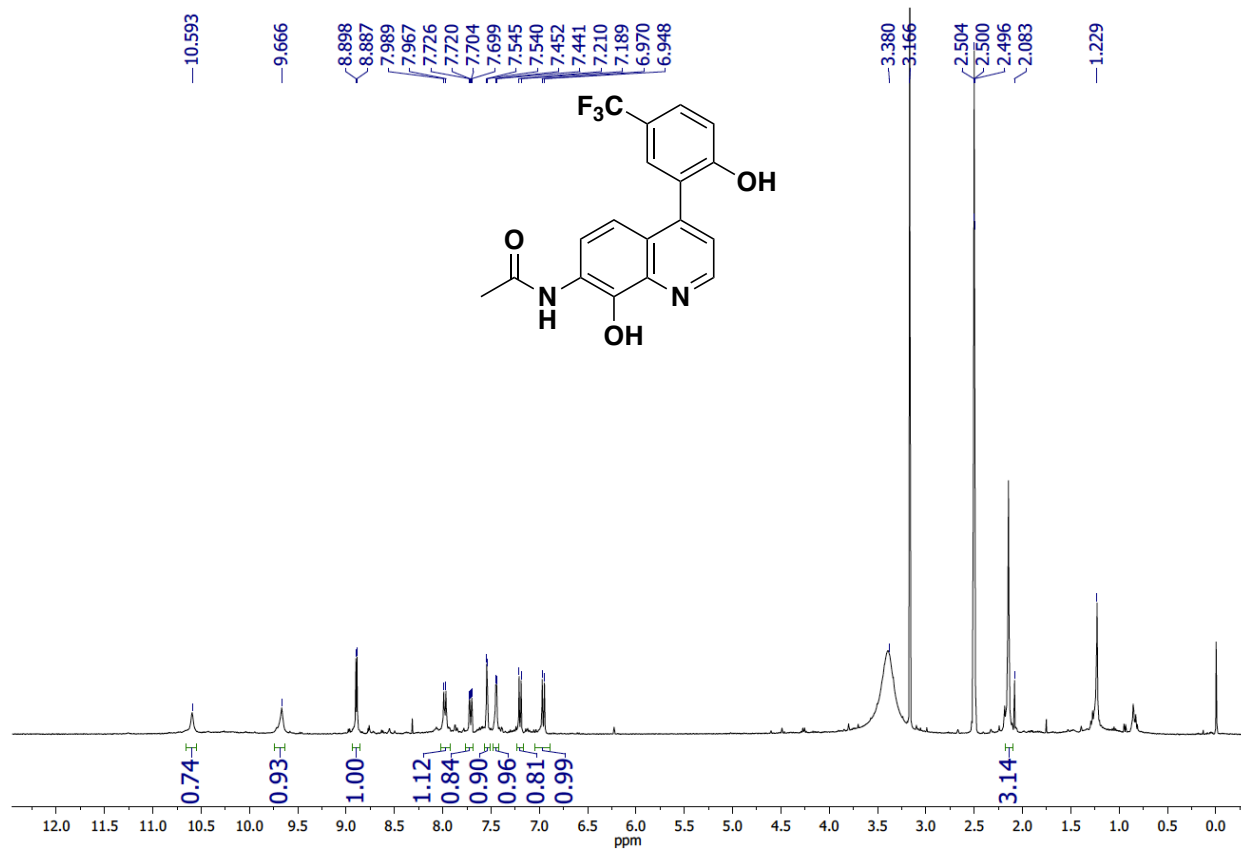

7-Acetamido-4-(2-hydroxy-(5-trifluoromethyl)phenyl)-8-hydroxyquinoline (37) in DMSO-d<sub>6</sub>

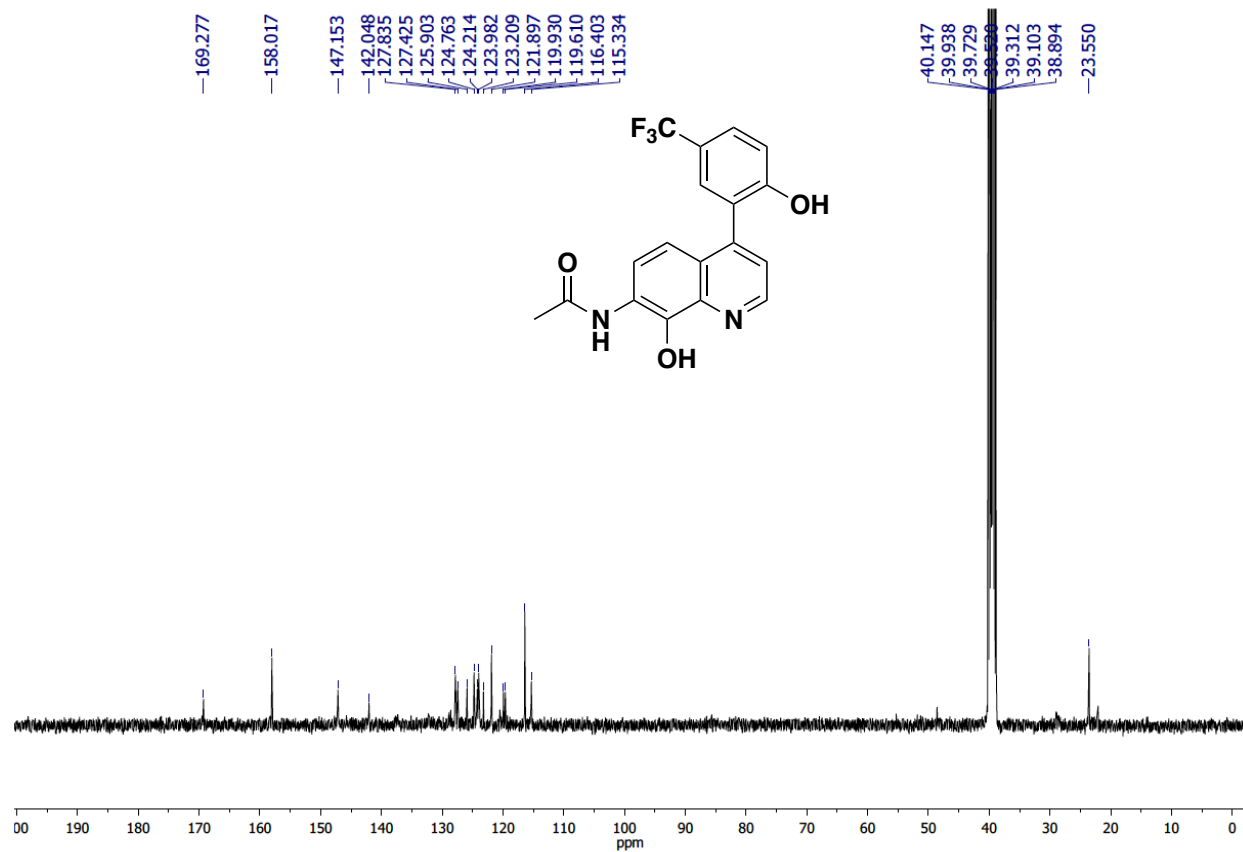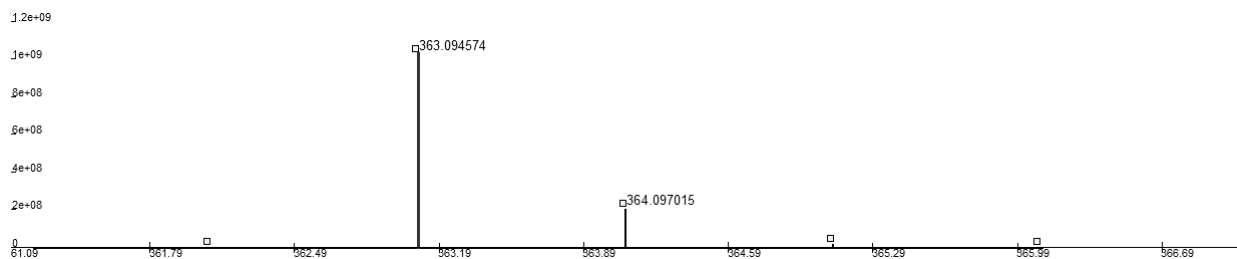

7-Acetamido-4-(2-hydroxy-(5-trifluoromethyl)phenyl)-8-hydroxyquinoline (37)

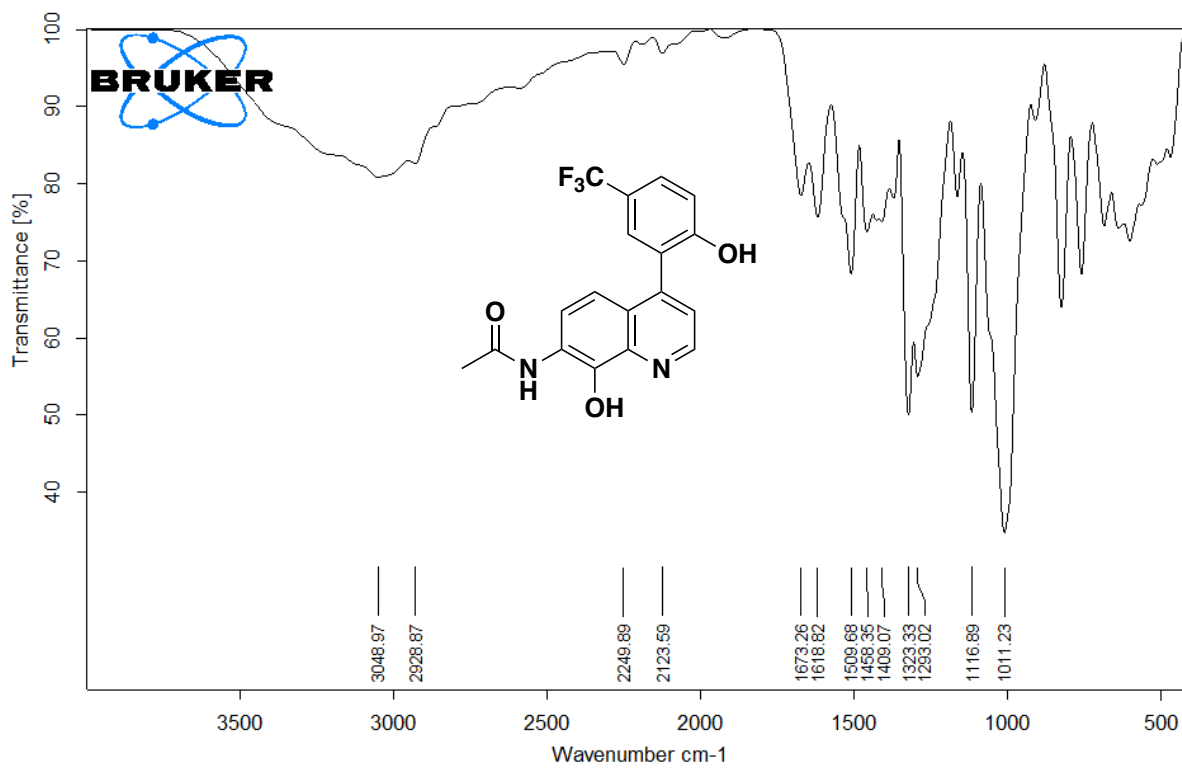



7-Acetamido-4-(5-chloro-2-hydroxyphenyl)-8-hydroxyquinoline (38) in DMSO-d<sub>6</sub>

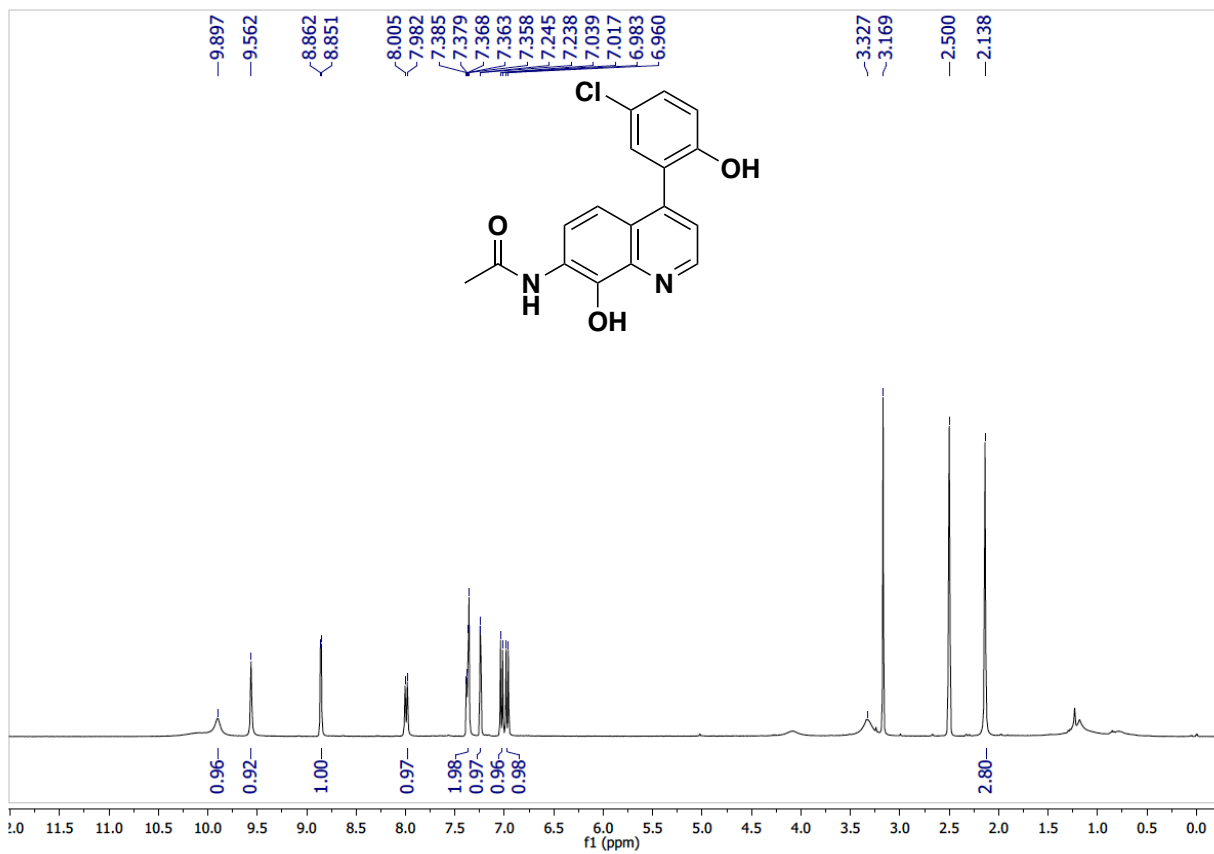

7-Acetamido-4-(5-chloro-2-hydroxyphenyl)-8-hydroxyquinoline (38) in DMSO-d<sub>6</sub>

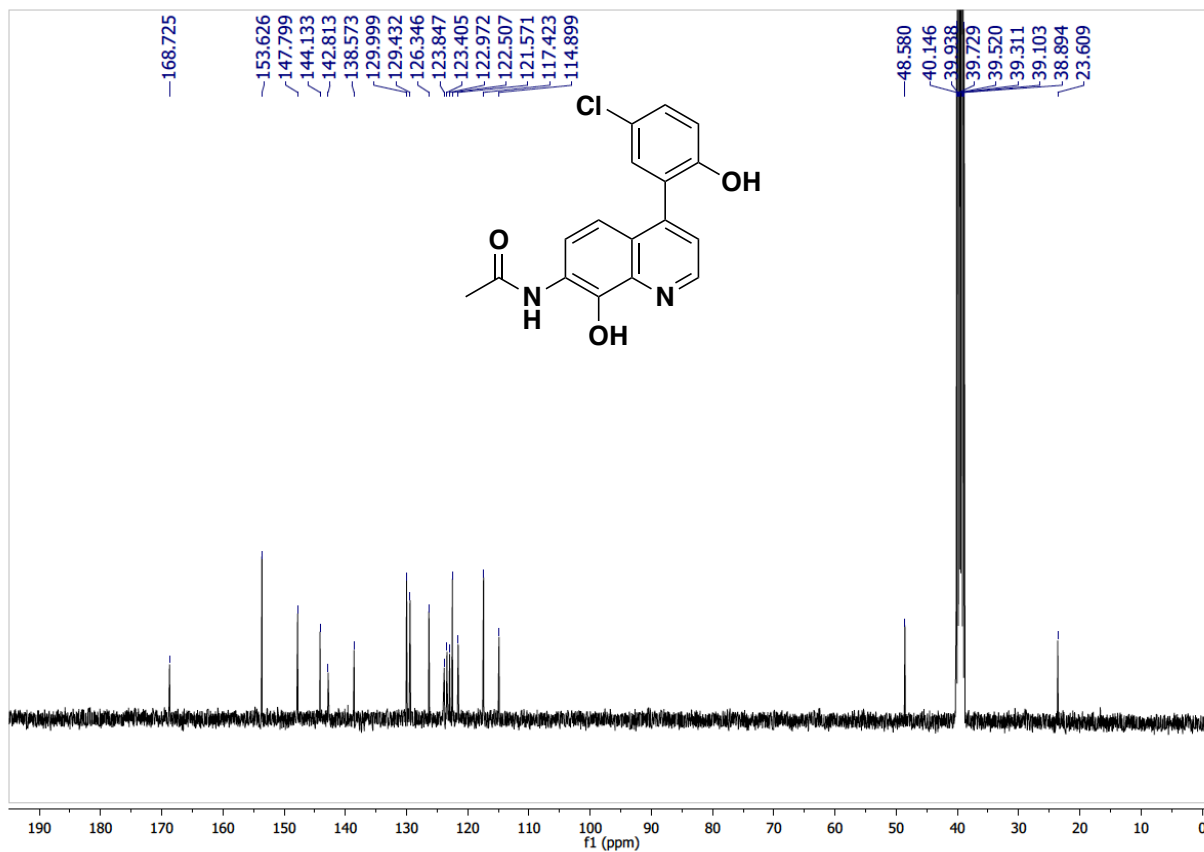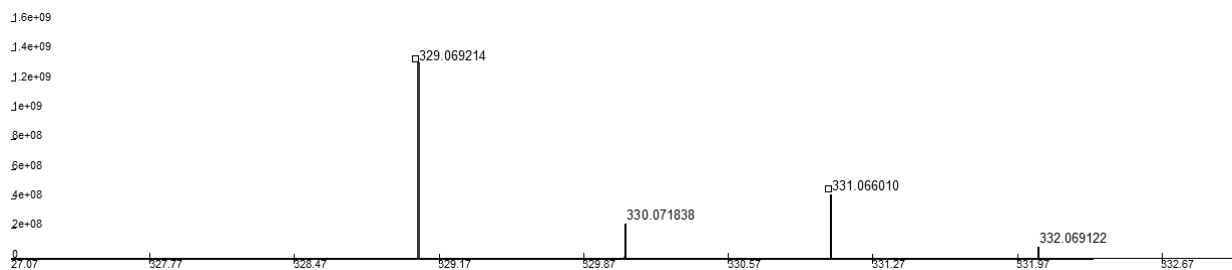

7-Acetamido-4-(5-chloro-2-hydroxyphenyl)-8-hydroxyquinoline (38)

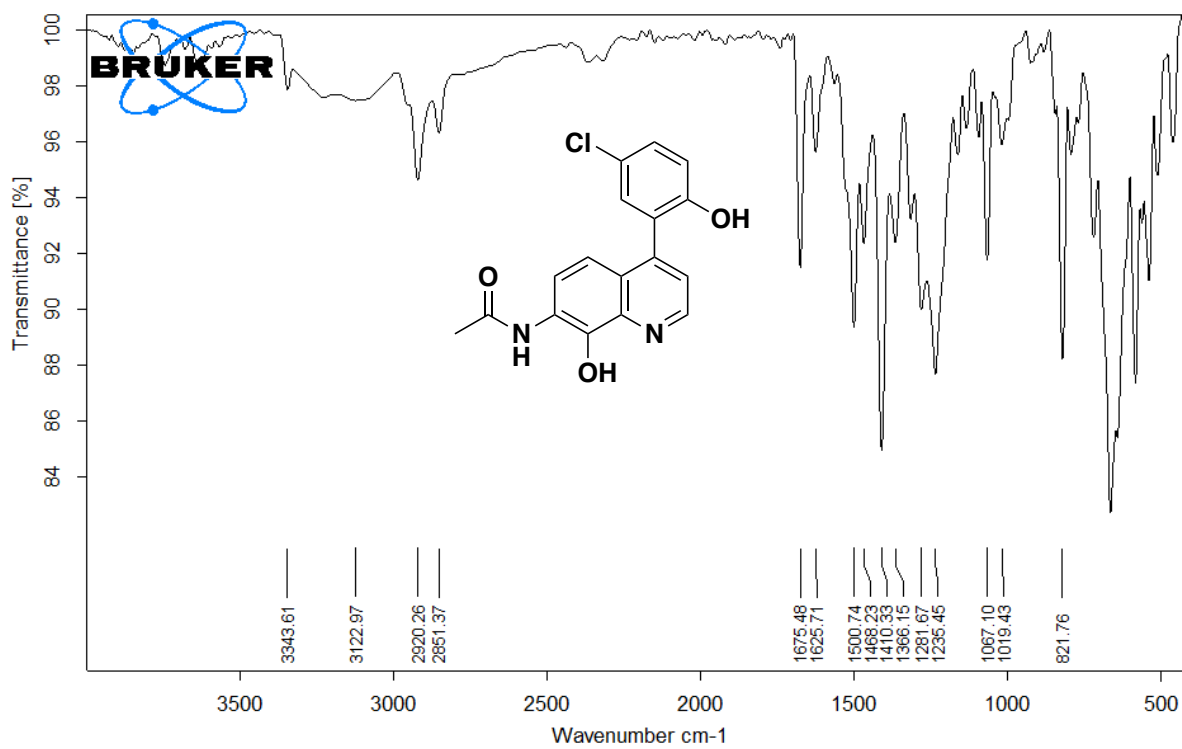

8-Hydroxy-4-(phenyl)-7-pivalamidoquinoline (39) in CD<sub>3</sub>OD

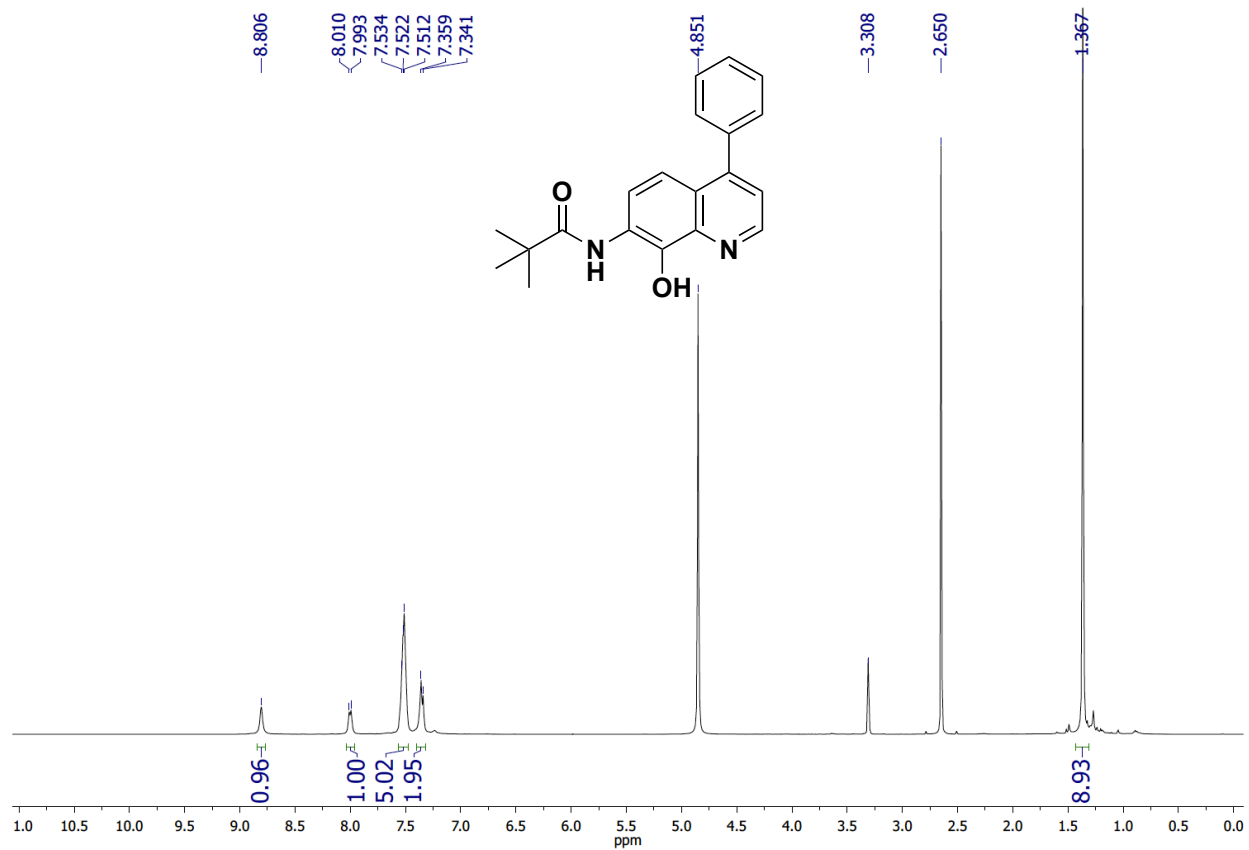

### 8-Hydroxy-4-(phenyl)-7-pivalamidoquinoline (39) in CD<sub>3</sub>OD

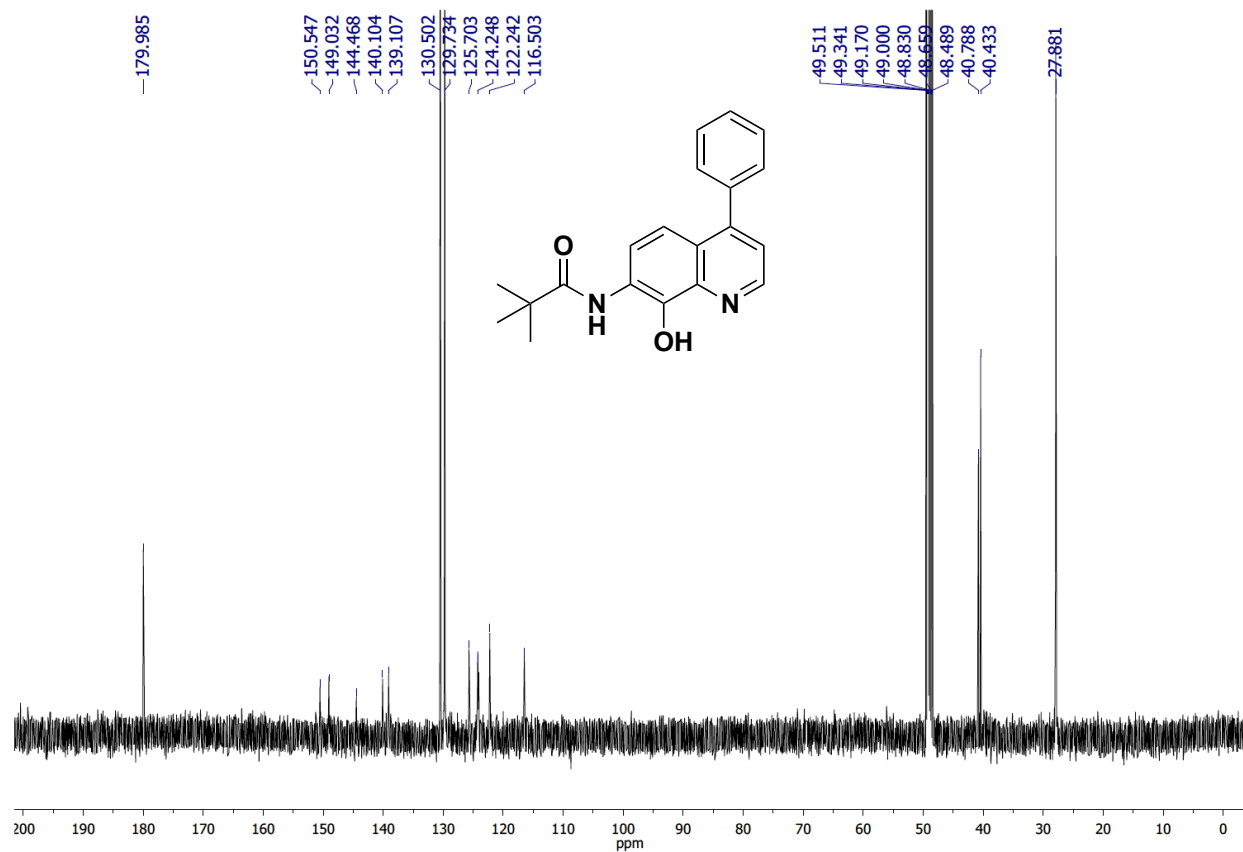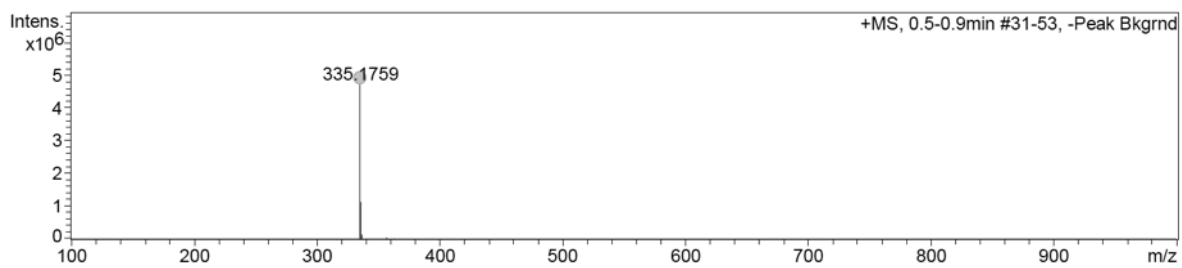

### 8-Hydroxy-4-(phenyl)-7-pivalamidoquinoline (39)

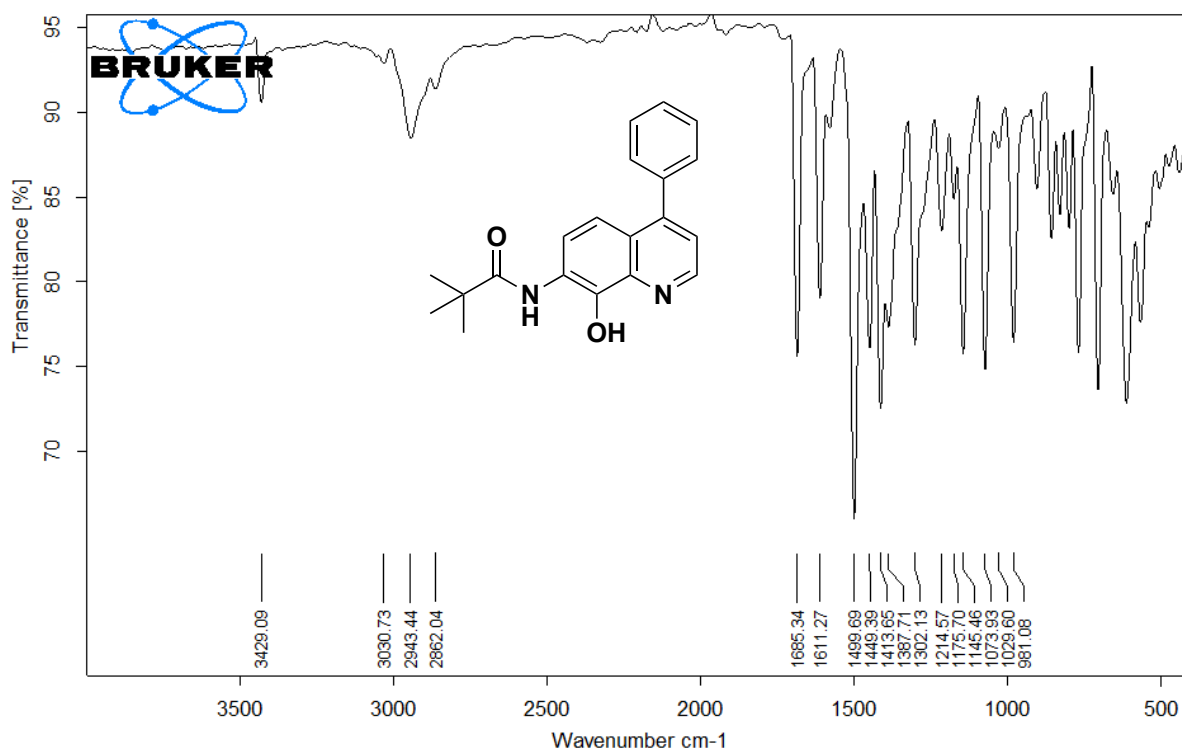

4-(5-fluoro-2-hydroxyphenyl)-8-hydroxy-7-pivalamidoquinoline (40) in CD<sub>3</sub>OD

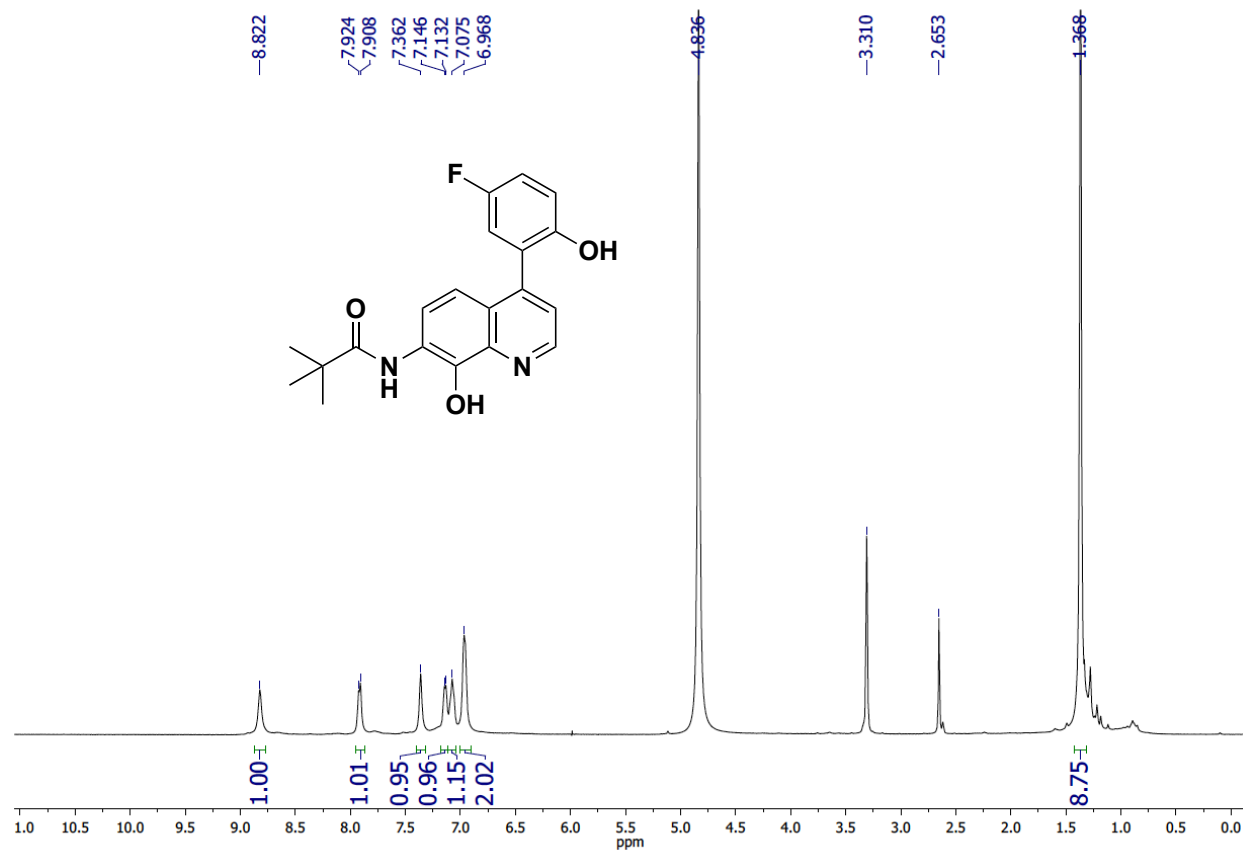

4-(5-fluoro-2-hydroxyphenyl)-8-hydroxy-7-pivalamidoquinoline (40) in CD<sub>3</sub>OD

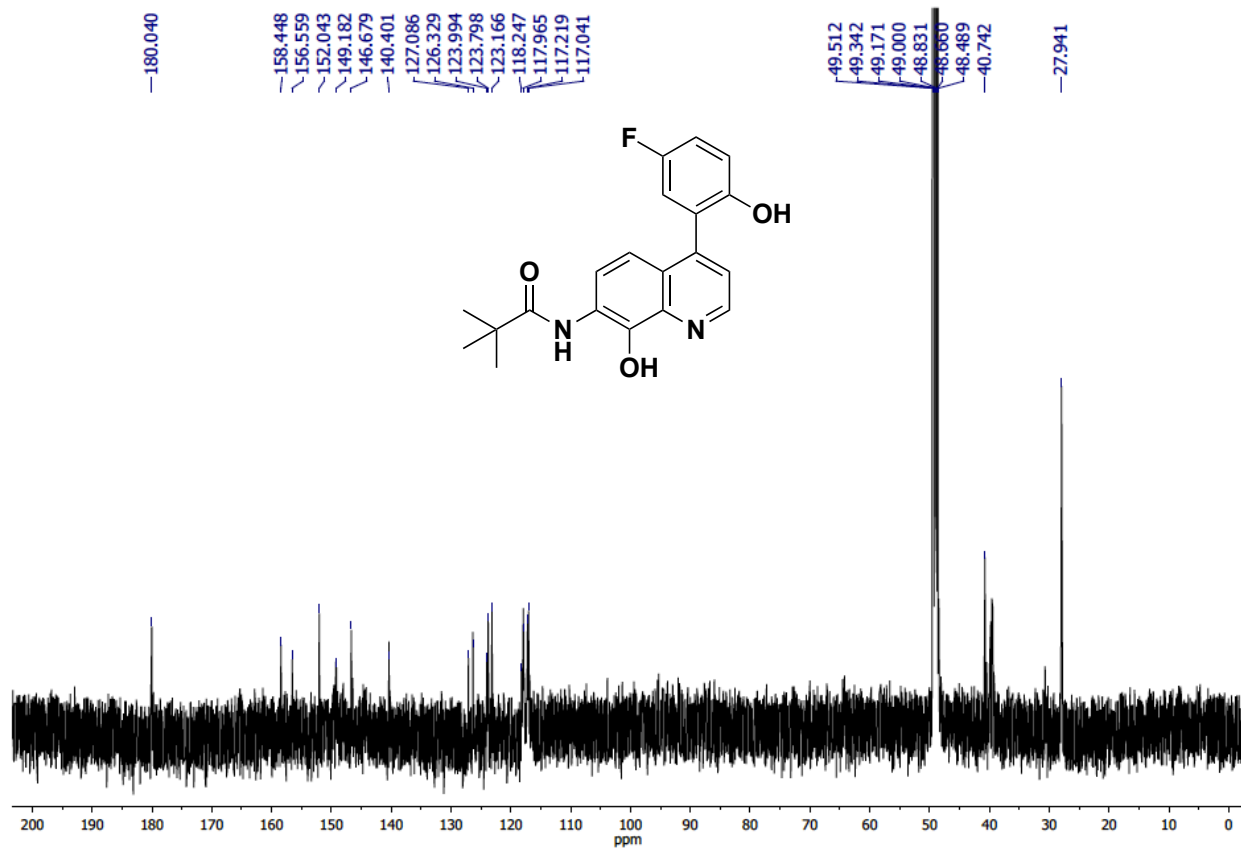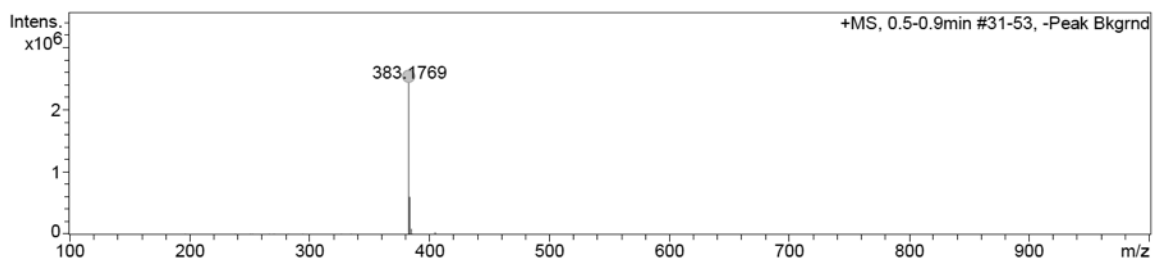



4-(5-fluoro-2-hydroxyphenyl)-8-hydroxy-7-pivalamido-quinoline (40)

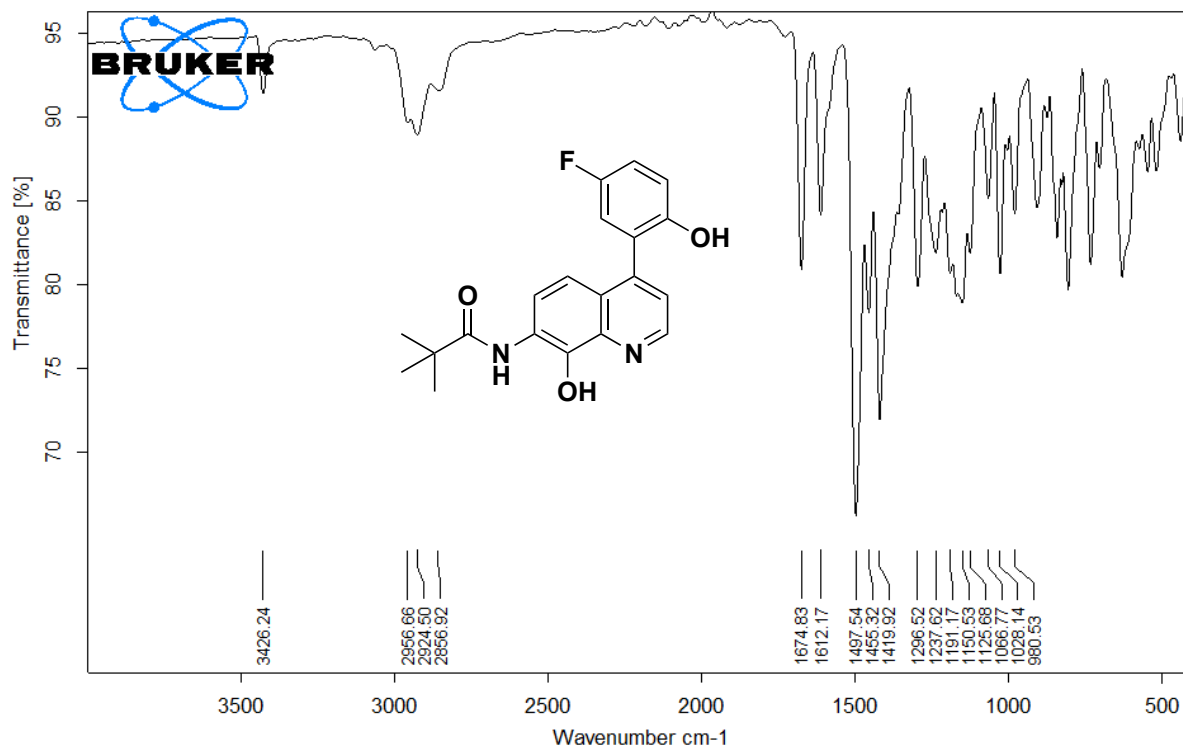

4-(5-fluoro-2-hydroxyphenyl)-8-hydroxy-7-(2-(morpholin-4-yl)acetamido)quinoline (41) in DMSO

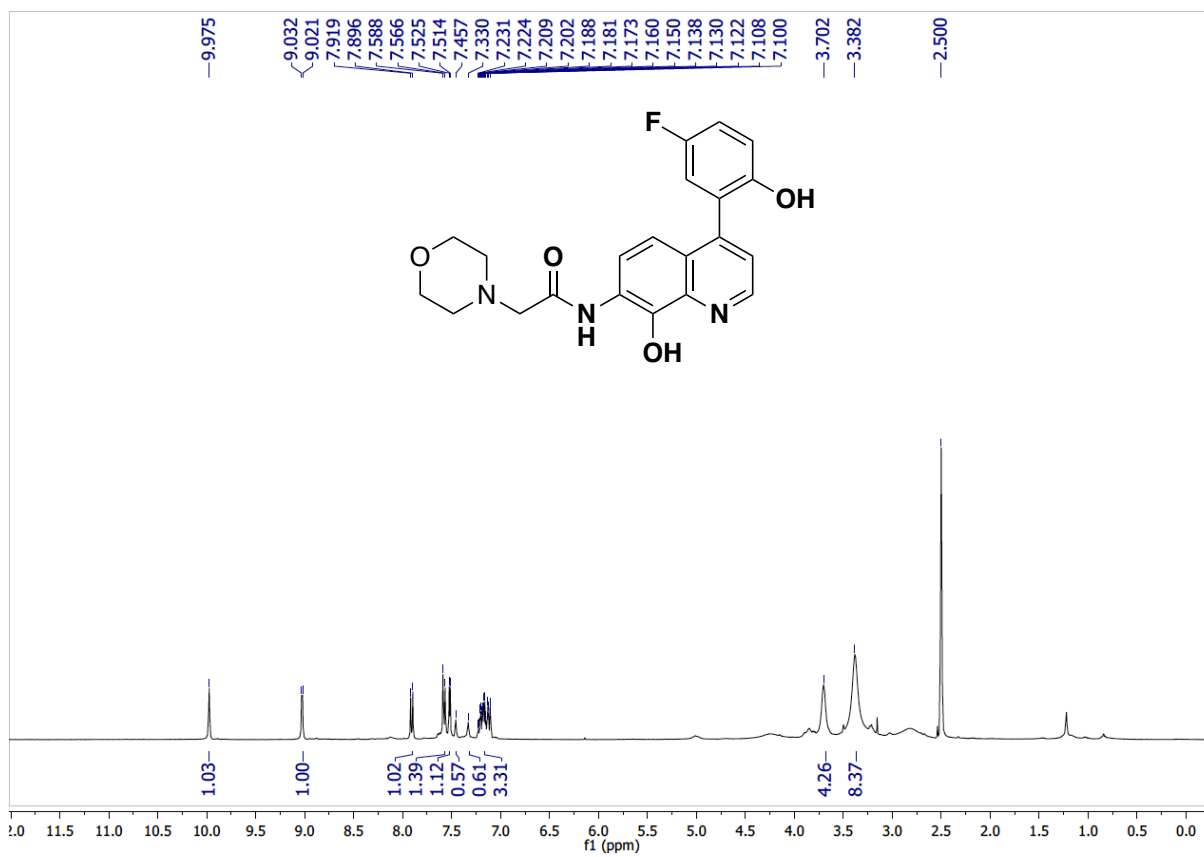

4-(5-fluoro-2-hydroxyphenyl)-8-hydroxy-7-(2-(morpholin-4-yl)acetamido)quinoline (41) in DMSO

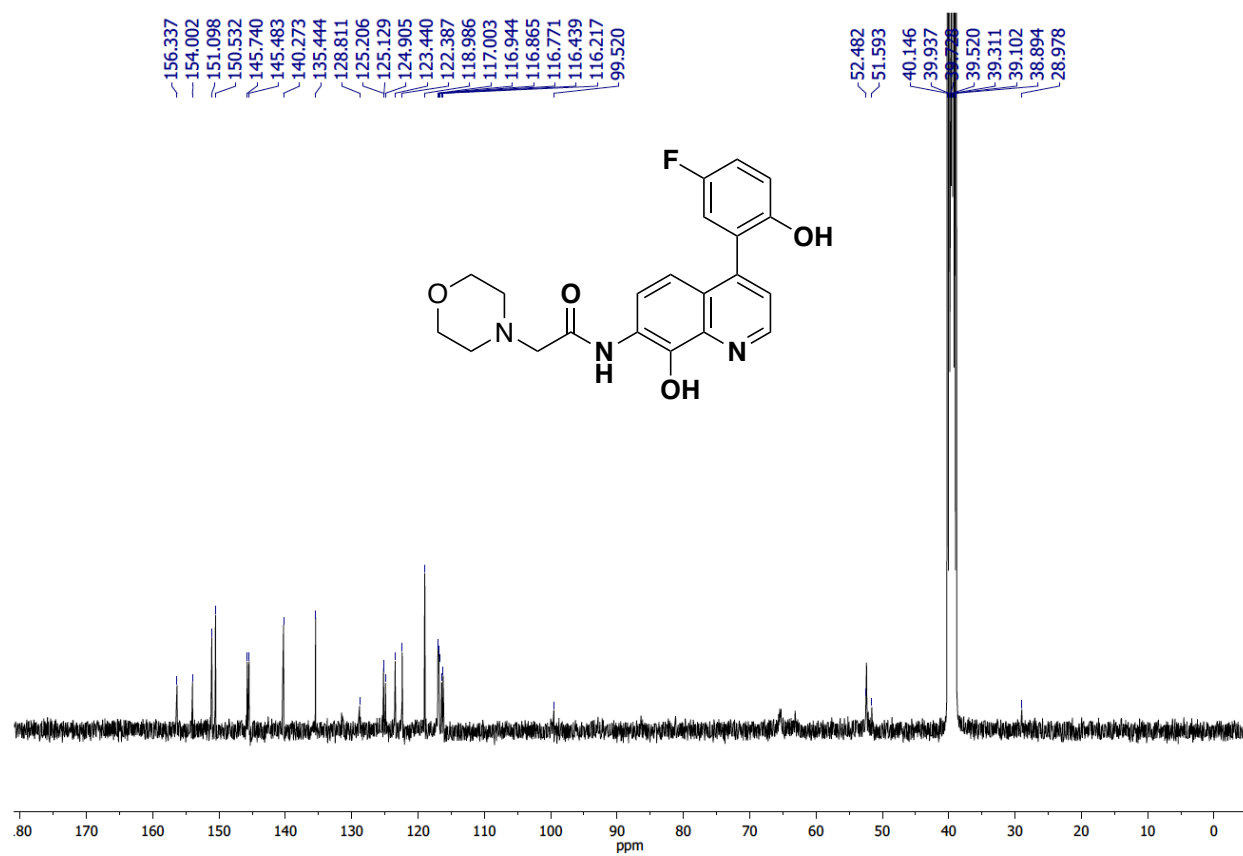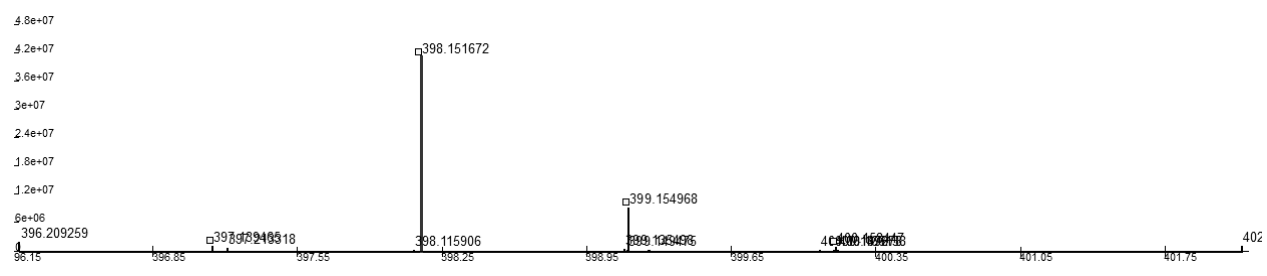

4-(5-fluoro-2-hydroxyphenyl)-8-hydroxy-7-(2-(morpholin-4-yl)acetamido)quinoline (41)

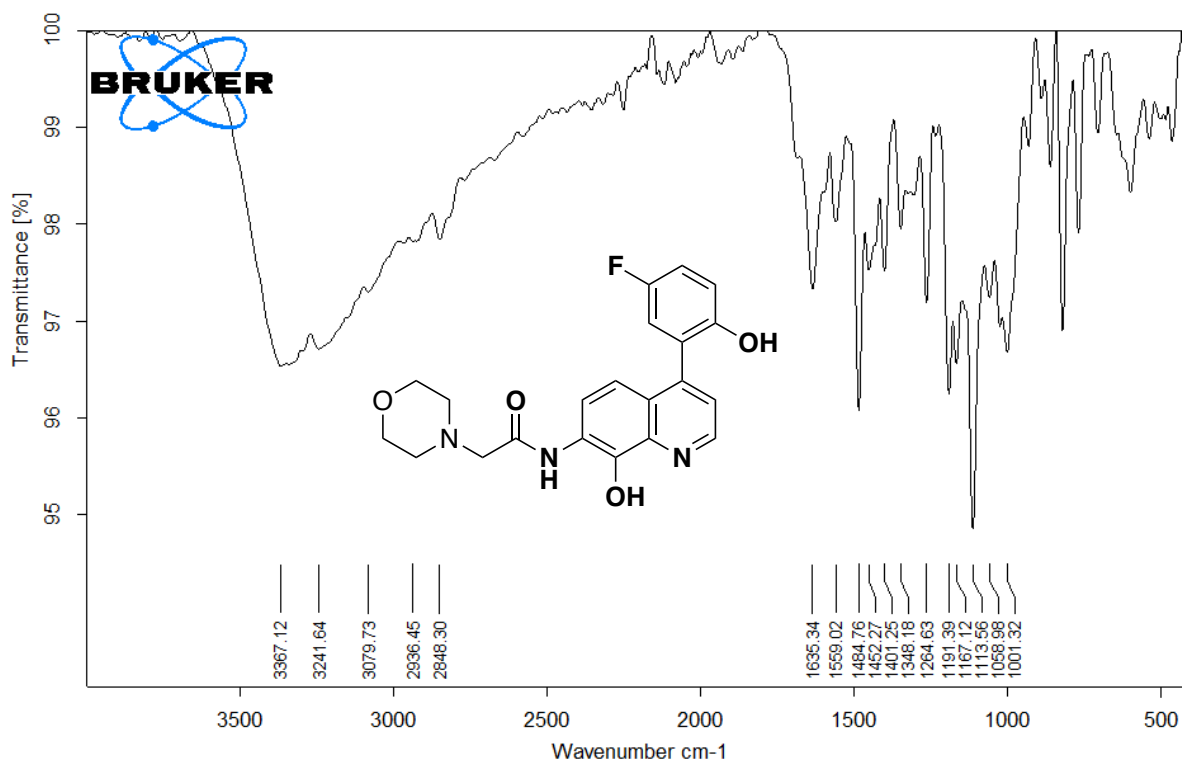

4-(5-fluoro-2-hydroxyphenyl)-8-hydroxy-7-(3-(morpholin-4-yl)propanamido)quinoline (42)

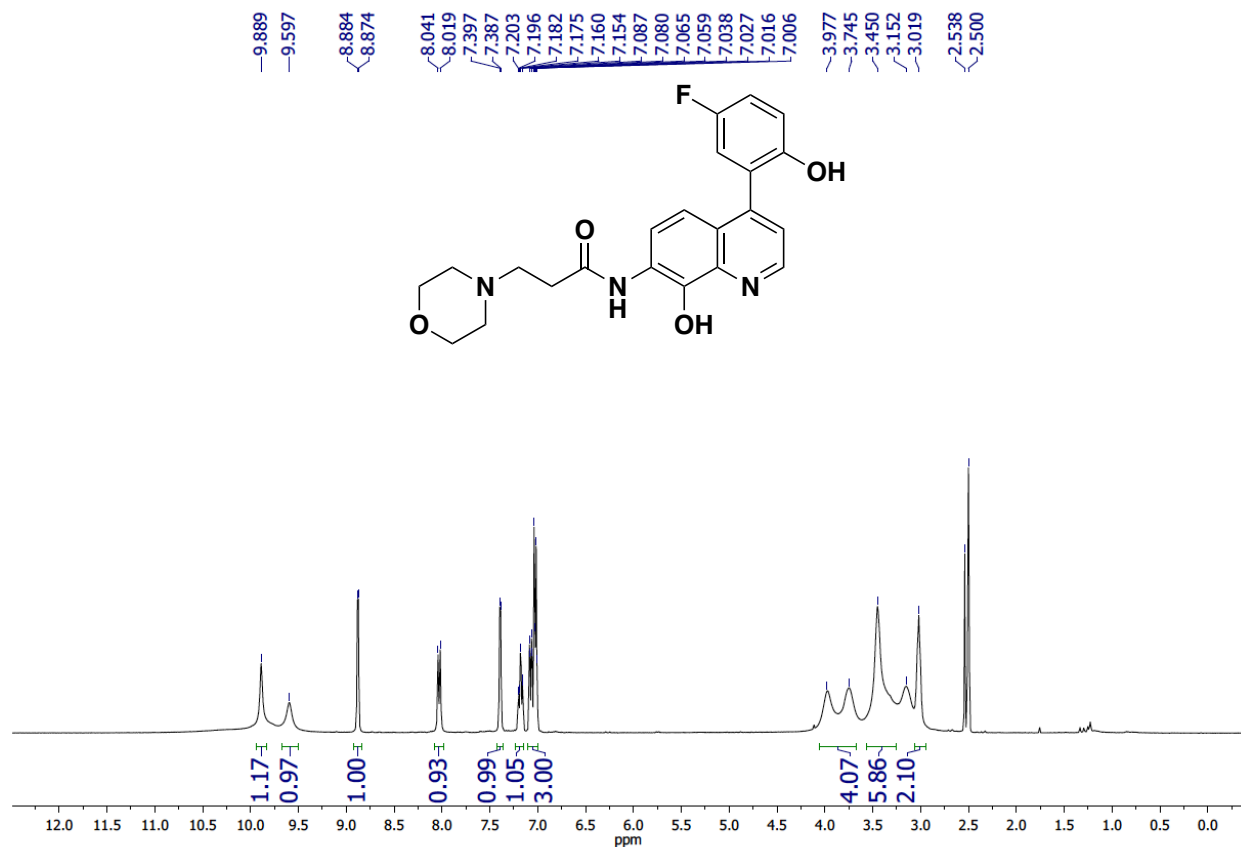

# 4-(5-fluoro-2-hydroxyphenyl)-8-hydroxy-7-(3-(morpholin-4-yl)propanamido)quinoline (42)

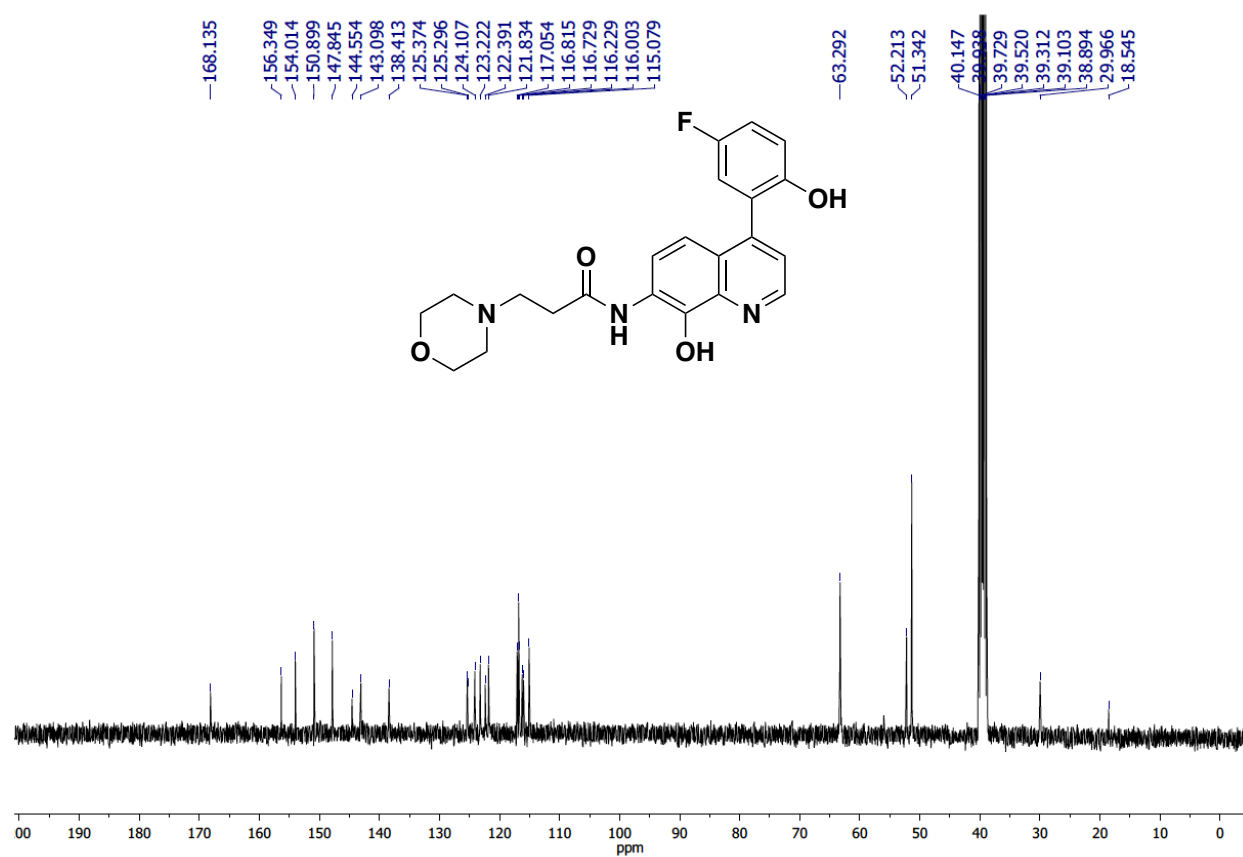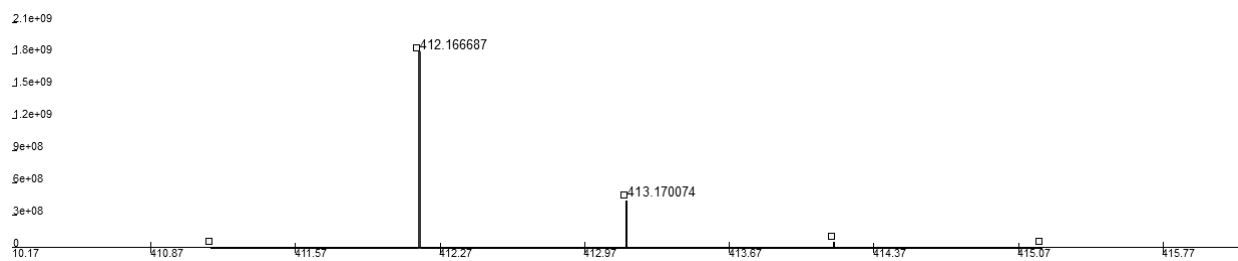

4-(5-fluoro-2-hydroxyphenyl)-8-hydroxy-7-(3-(morpholin-4-yl)propanamido)quinoline (42)

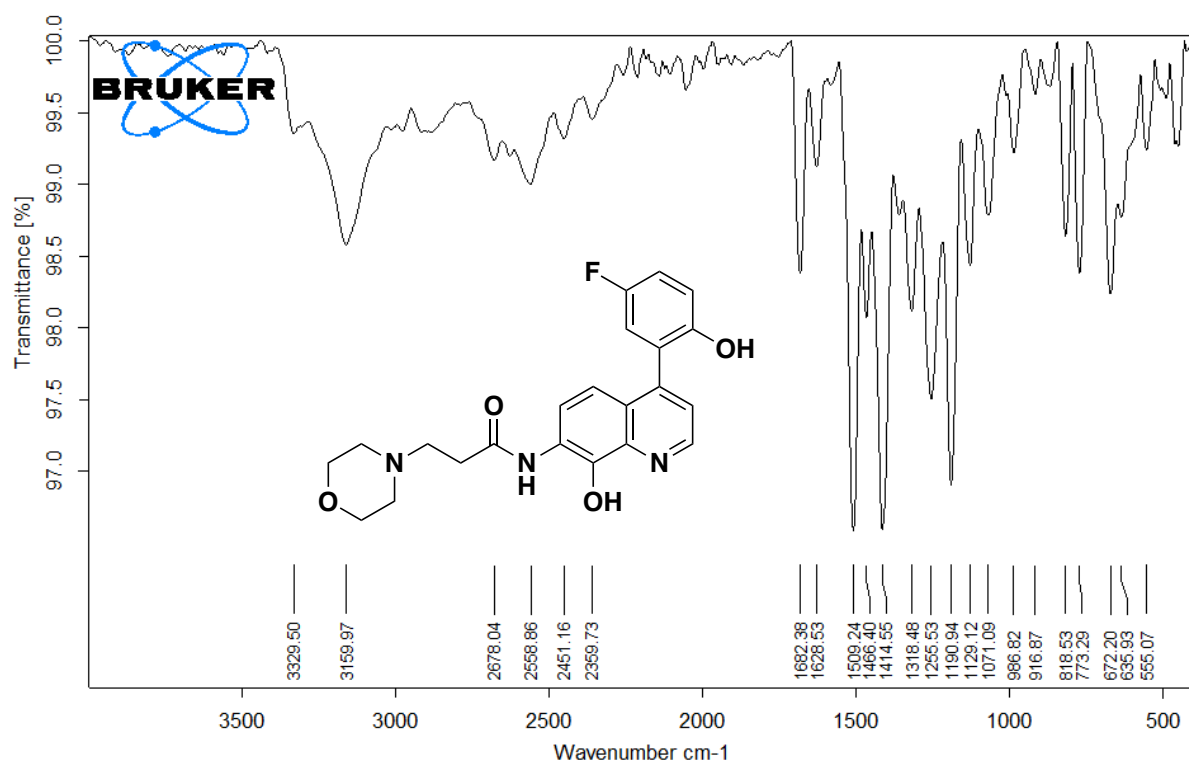

4-(2-Acetamidophenyl)-8-hydroxy-7-(3-(morpholin-4-yl)propanamido)quinoline (43) in DMSO-d<sub>6</sub>

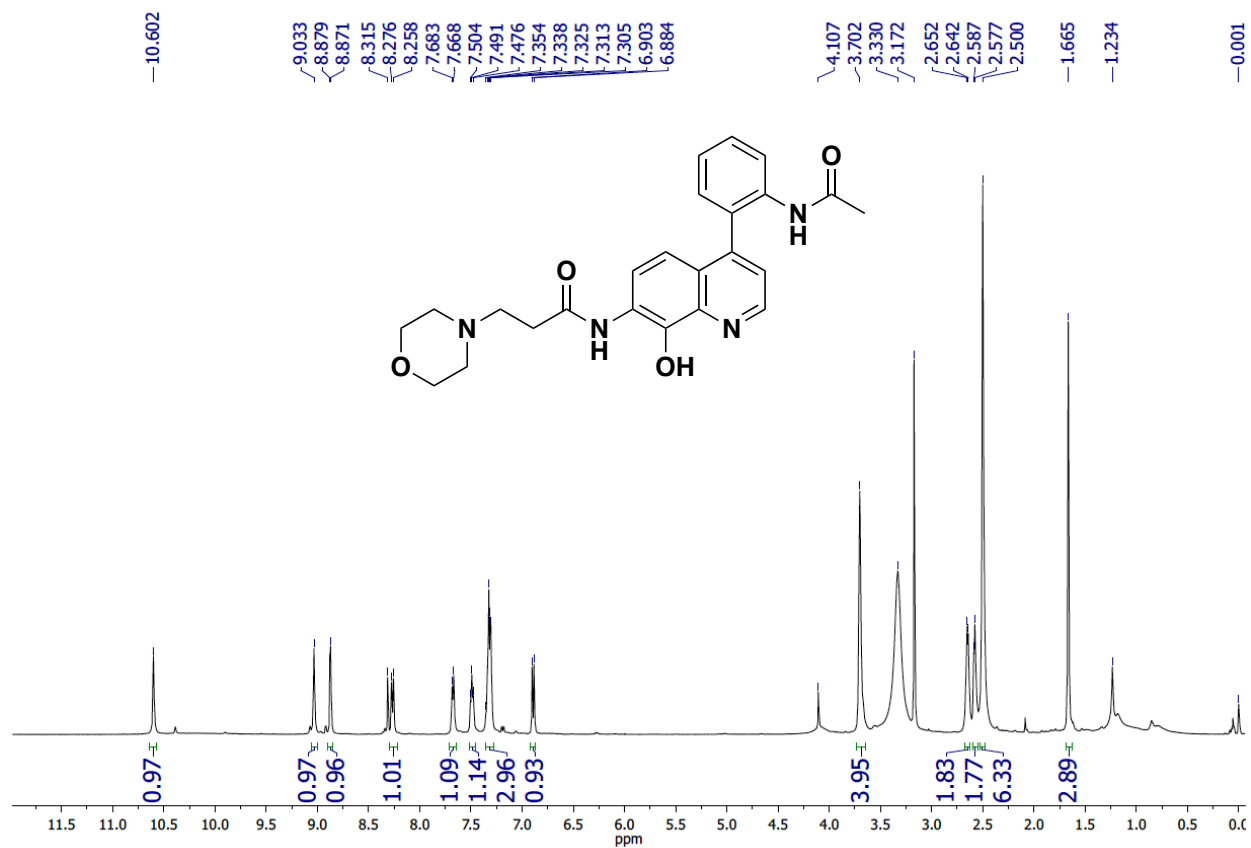



4-(2-Acetamidophenyl)-8-hydroxy-7-(3-(morpholin-4-yl)propanamido)quinoline (43) in DMSO-d<sub>6</sub>

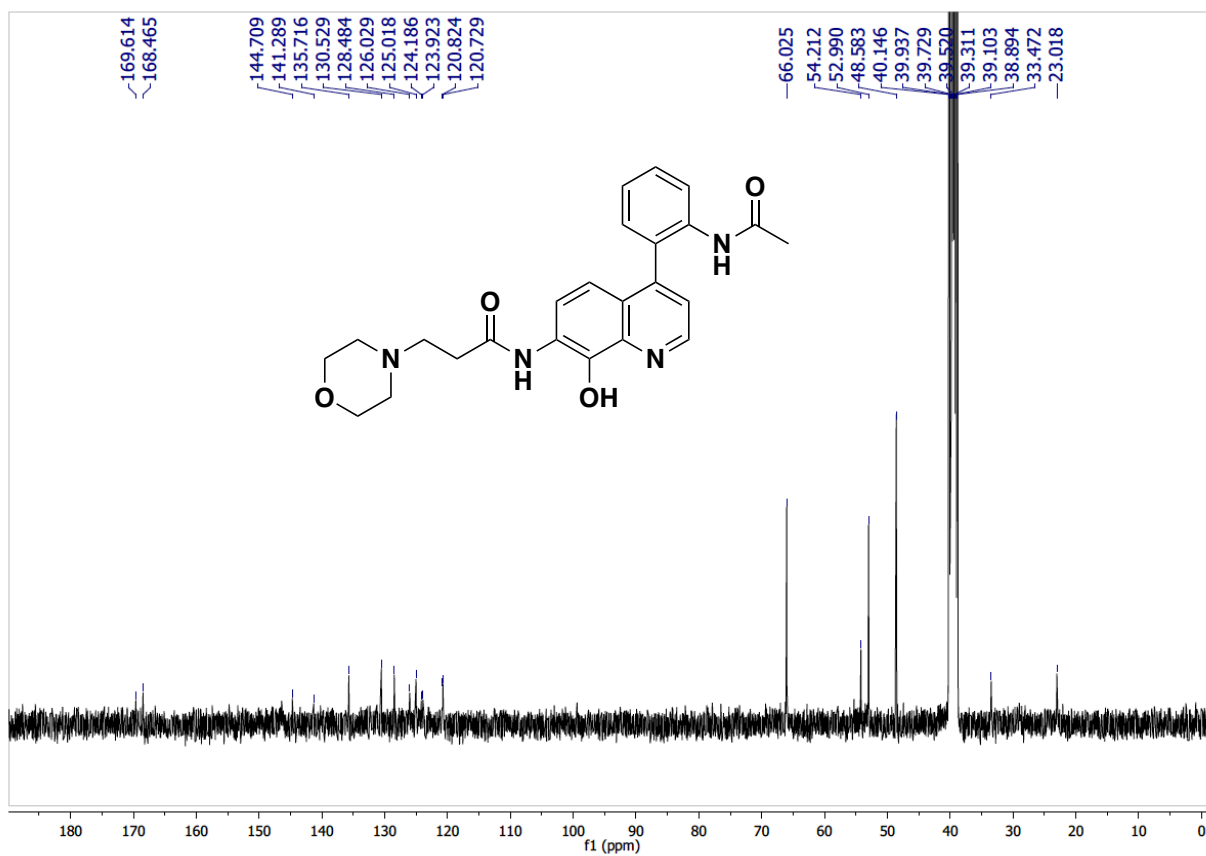

4-(2-Acetamidophenyl)-8-hydroxy-7-(3-(morpholin-4-yl)propanamido)quinoline (43)

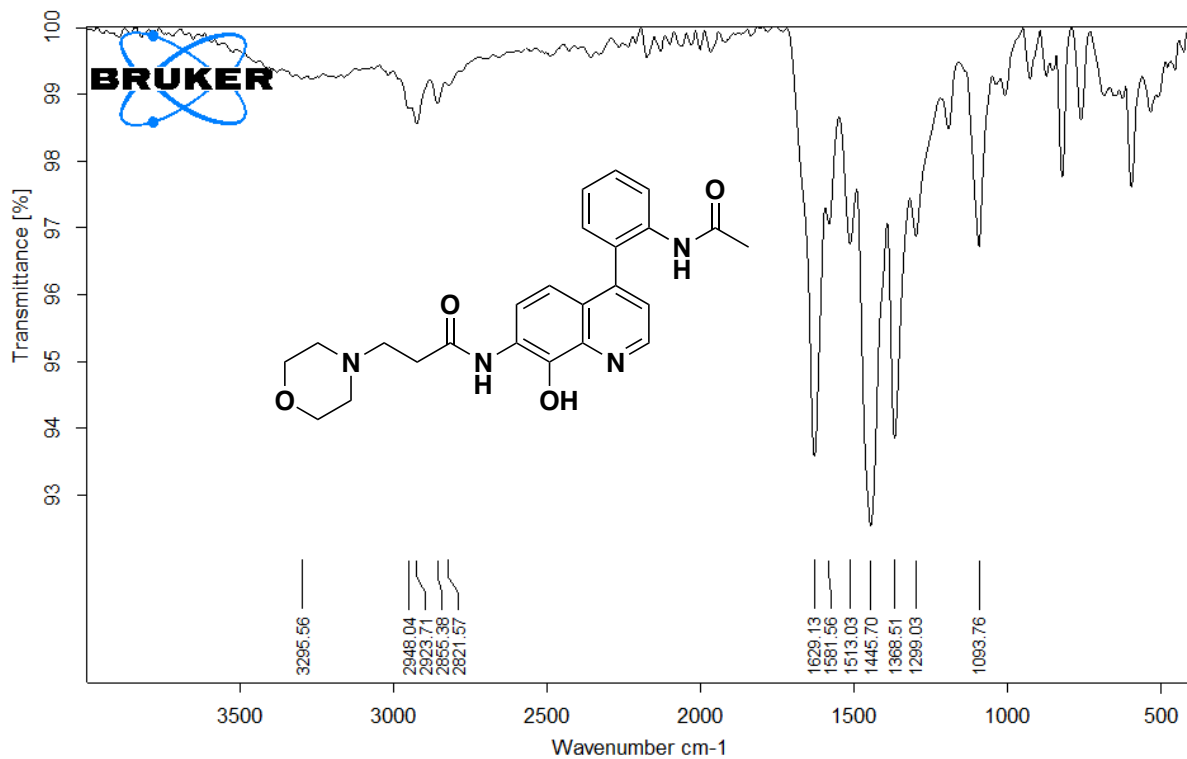

7-Acetamido-4-(2-benzofuranyl)-8-methoxyquinoline (45) in CDCl<sub>3</sub>

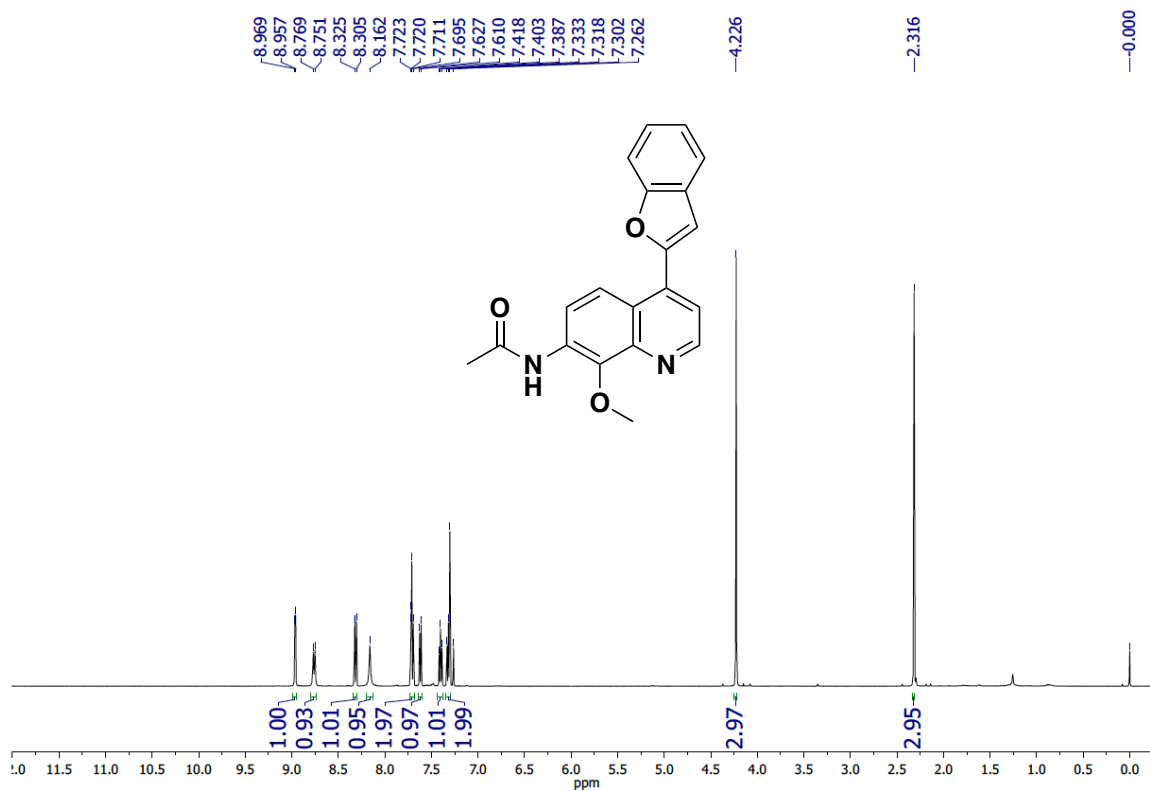

7-Acetamido-4-(2-benzofuranyl)-8-methoxyquinoline (45) in CDCl<sub>3</sub>

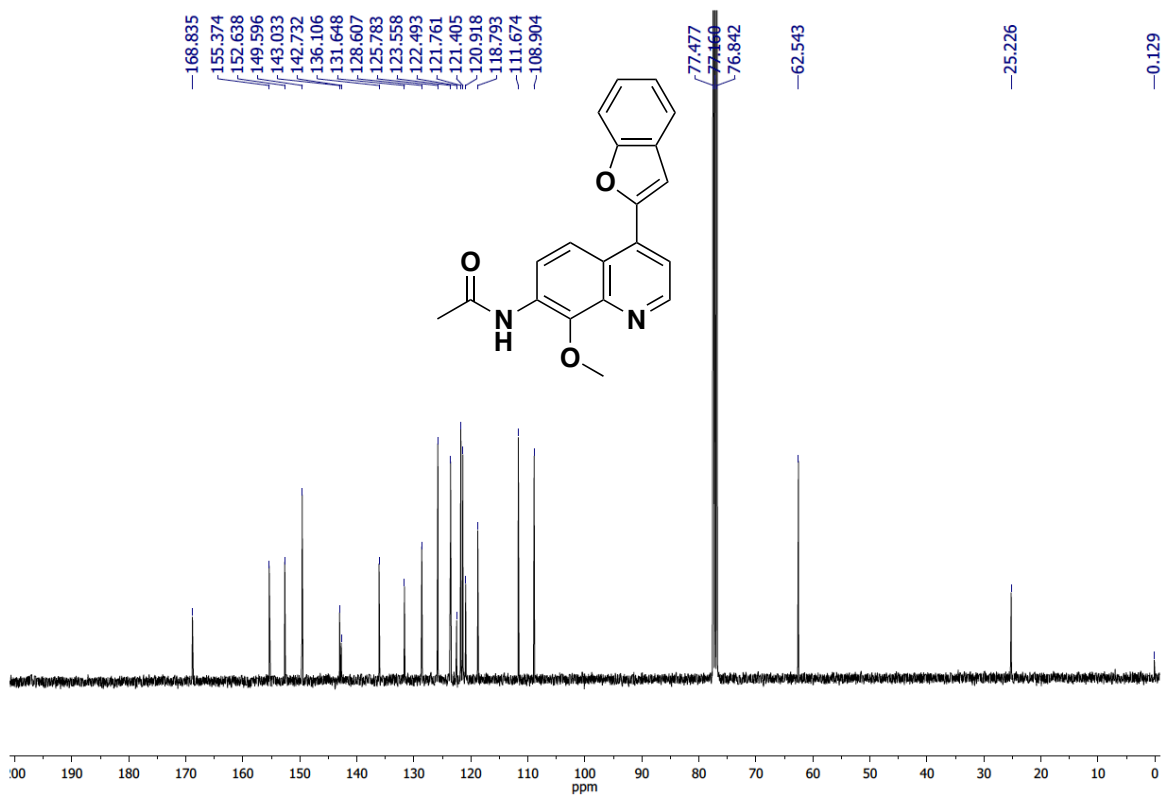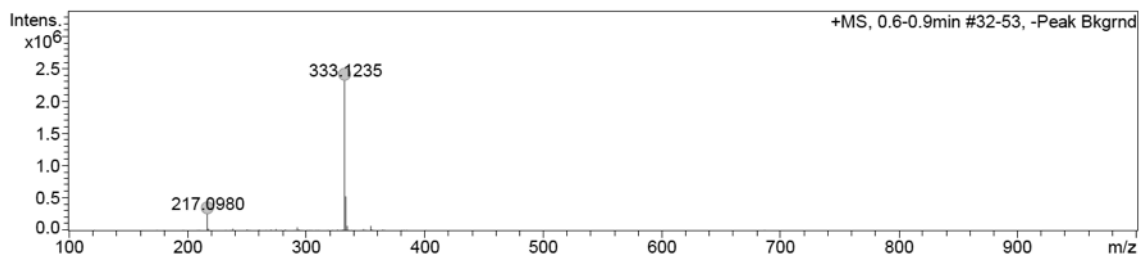

7-Acetamido-4-(2-benzofuranyl)-8-methoxyquinoline (45)

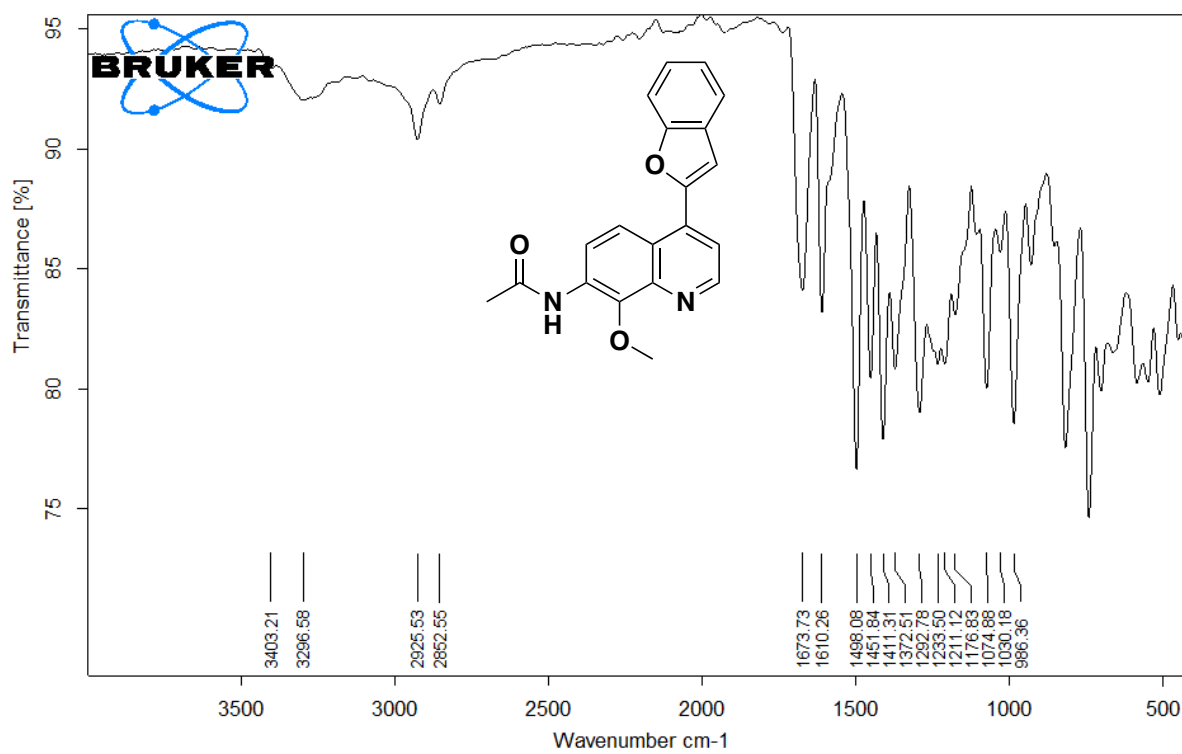

7-Acetamido-4-(benzo[b]thiophen-2-yl)-8-methoxyquinoline (45) in CDCl<sub>3</sub>

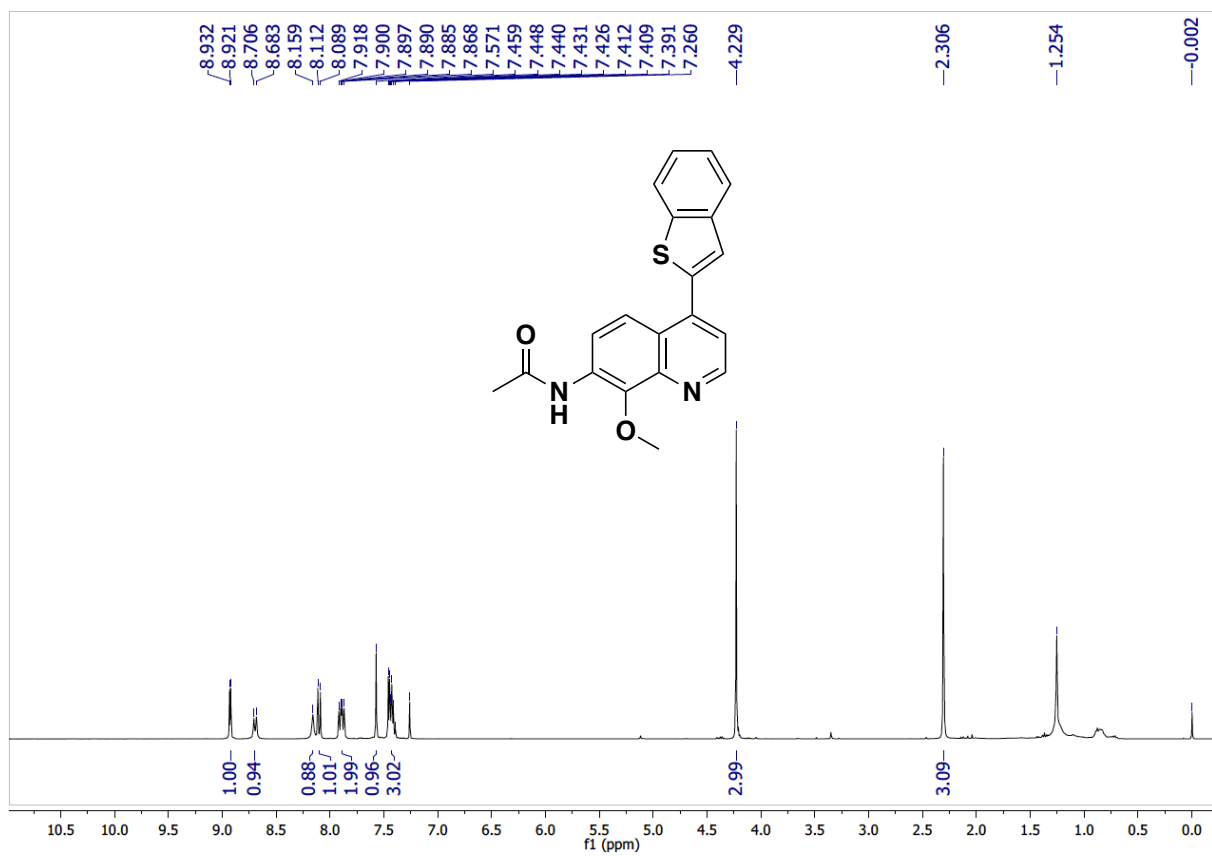

7-Acetamido-4-(benzo[b]thiophen-2-yl)-8-methoxyquinoline (45) in DMSO

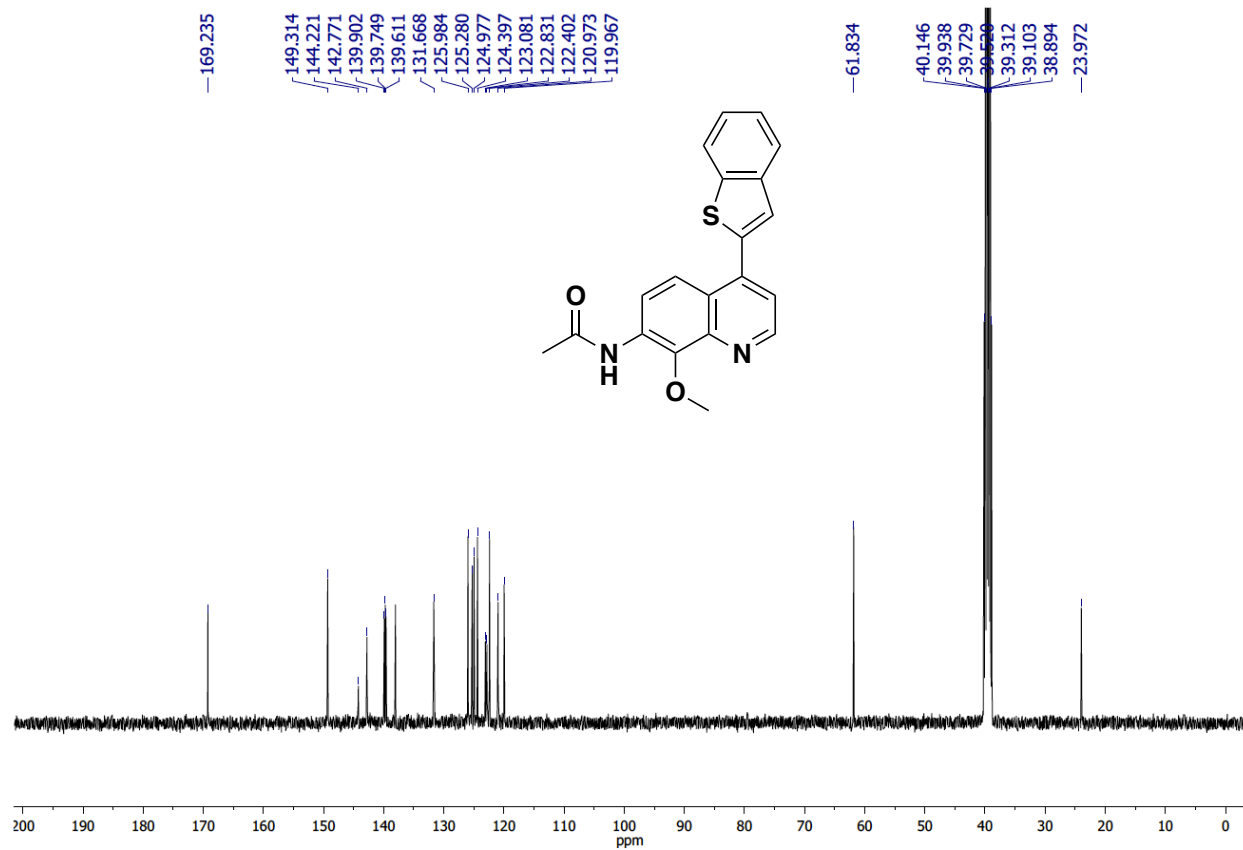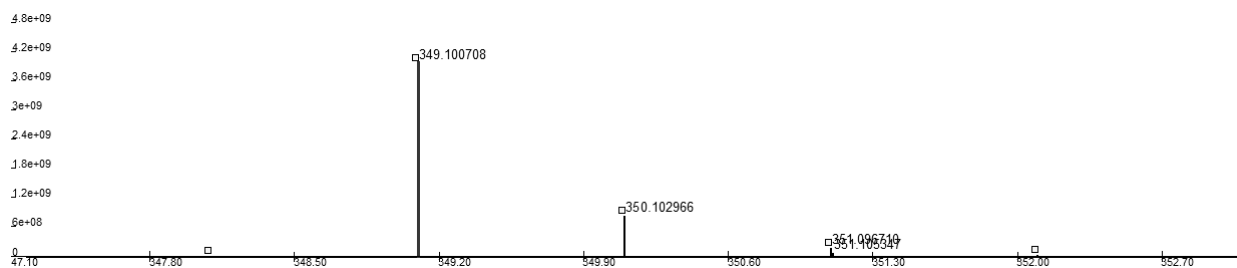

7-Acetamido-4-(benzo[b]thiophen-2-yl)-8-methoxyquinoline (45)

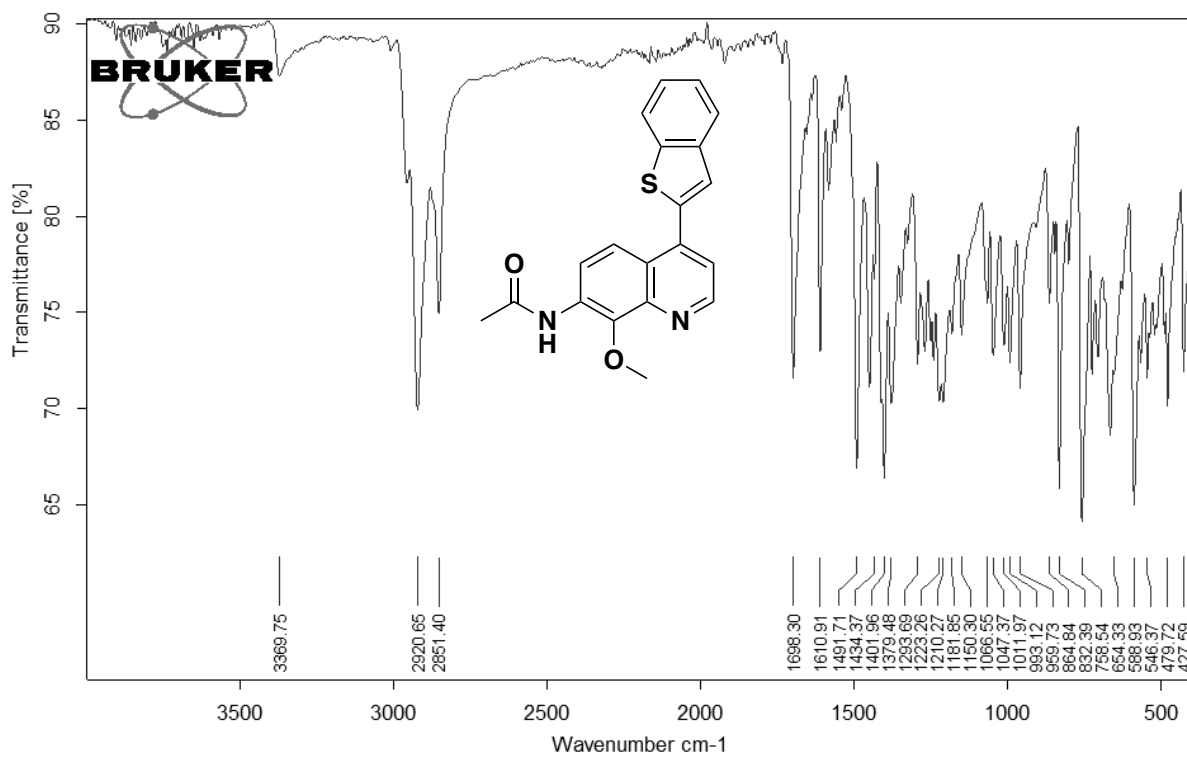



7-Acetamido-4-(2-furanyl)-8-methoxyquinoline (46) in CDCl<sub>3</sub>

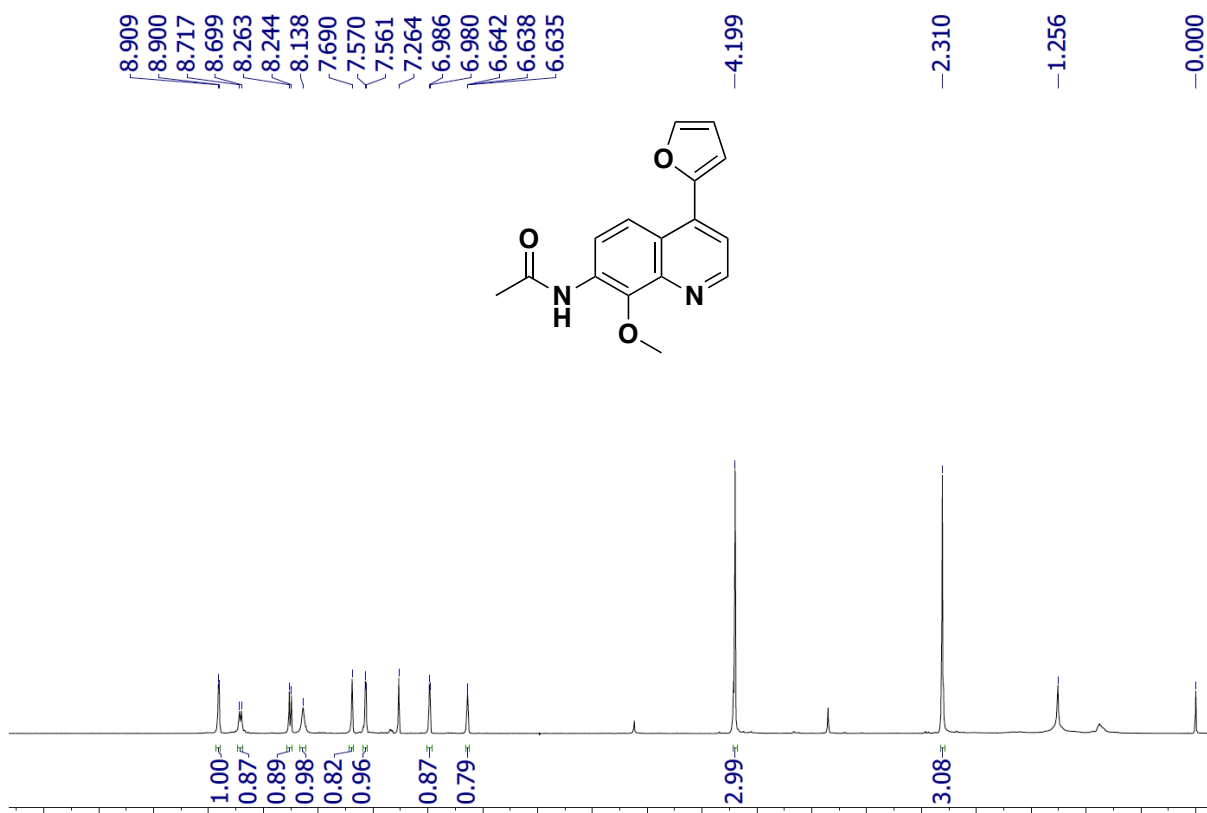

7-Acetamido-4-(2-furanyl)-8-methoxyquinoline (46) in CDCl<sub>3</sub>

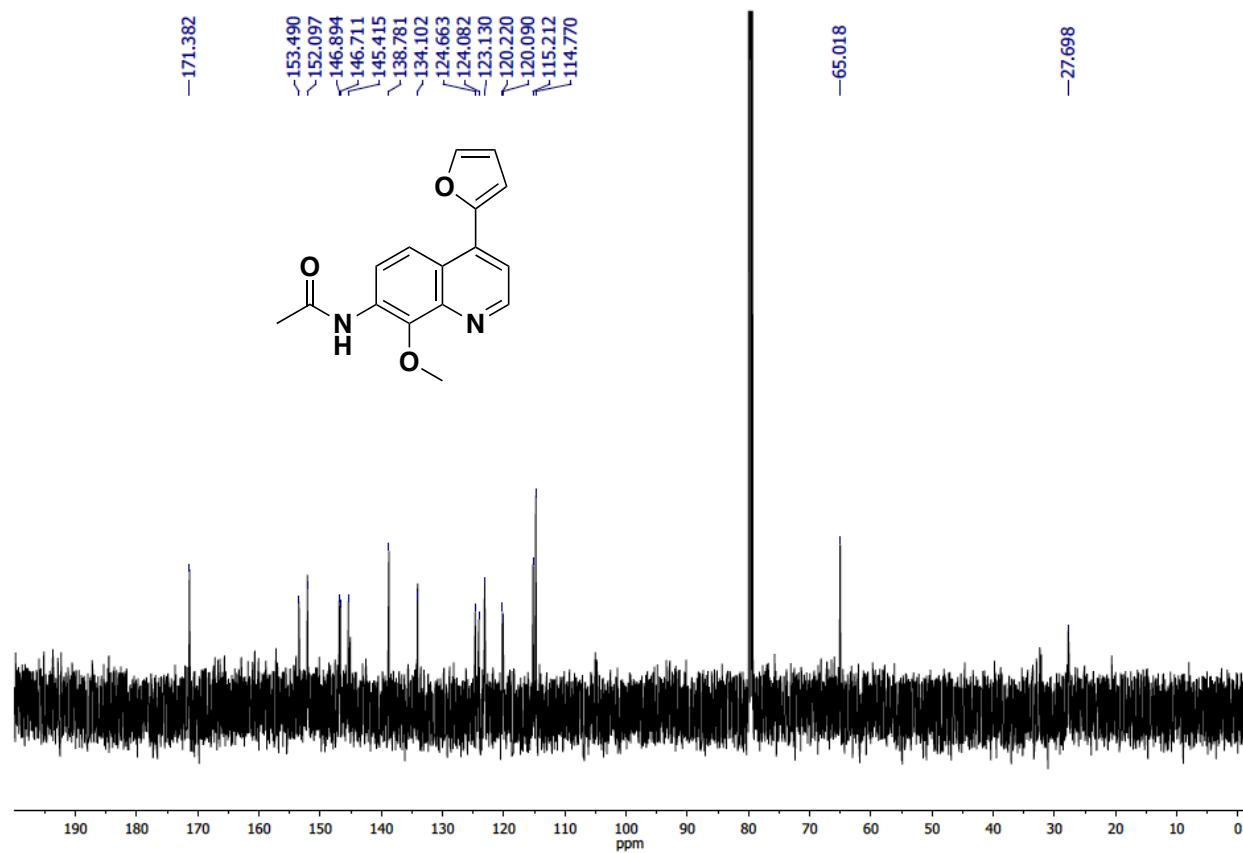

7-Acetamido-4-(2-furanyl)-8-methoxyquinoline (46)

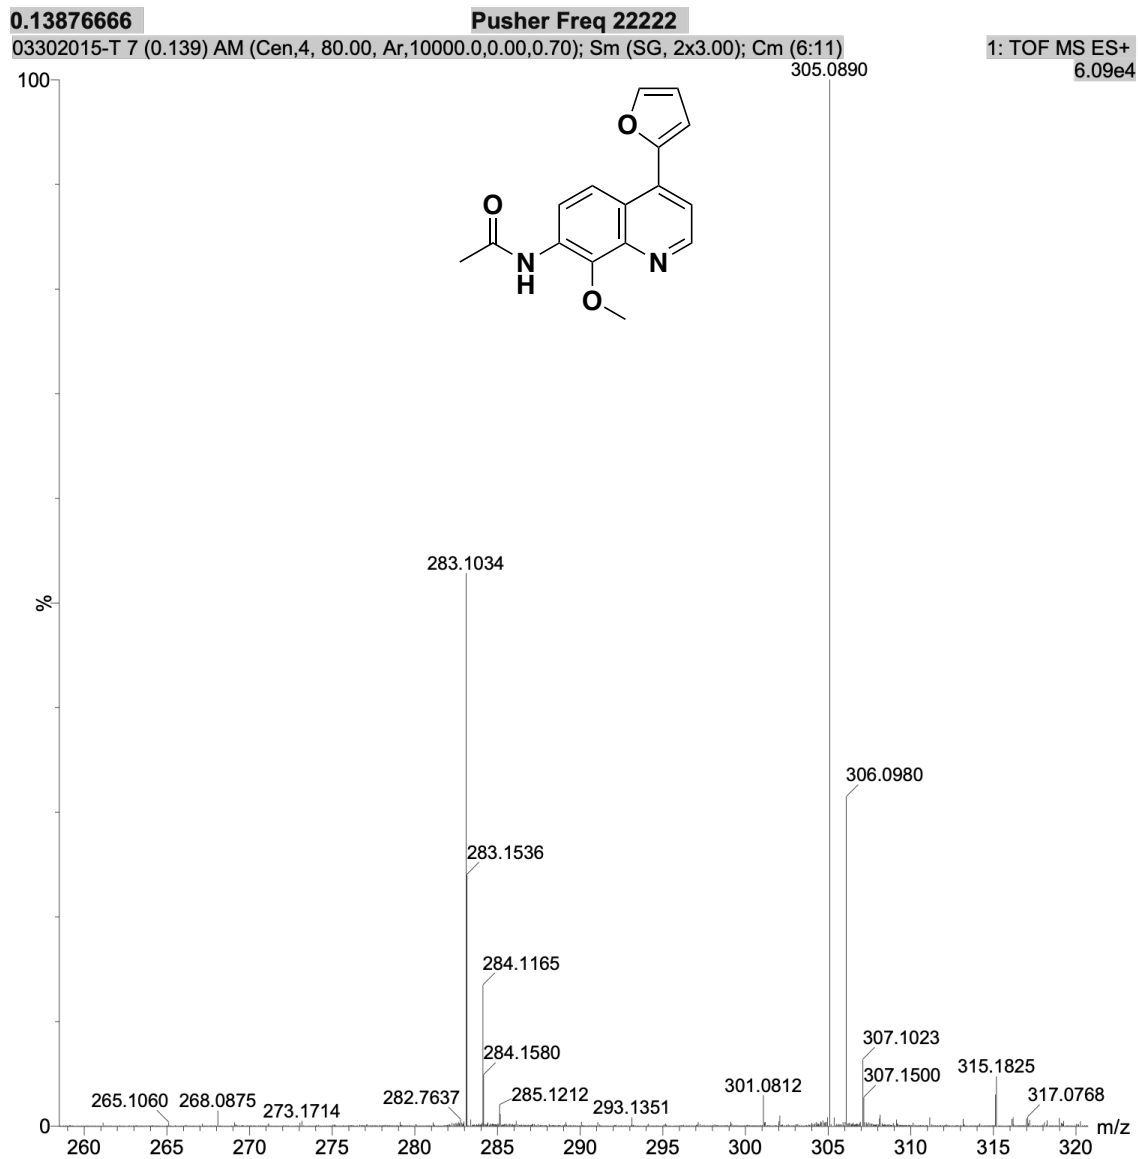

7-Acetamido-4-(2-furanyl)-8-methoxyquinoline (46)

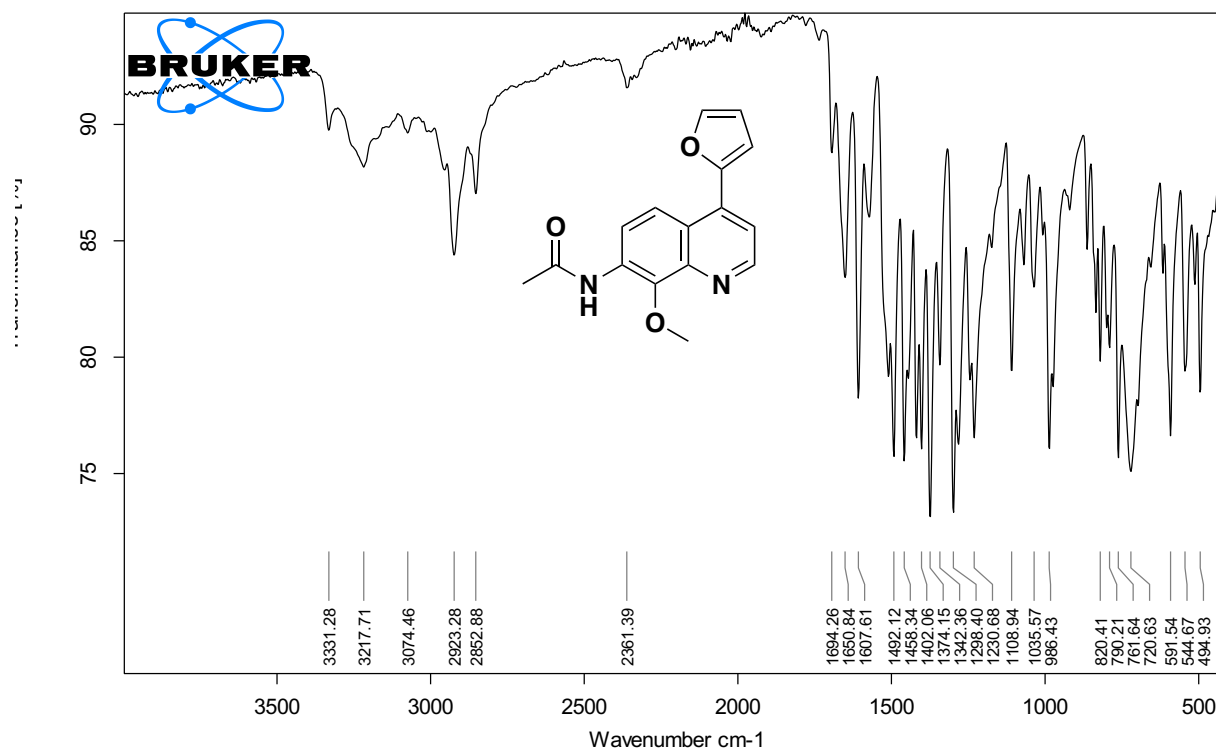

7-Acetamido-4-(3-furanyl)-8-methoxyquinoline (47) in CDCl<sub>3</sub>

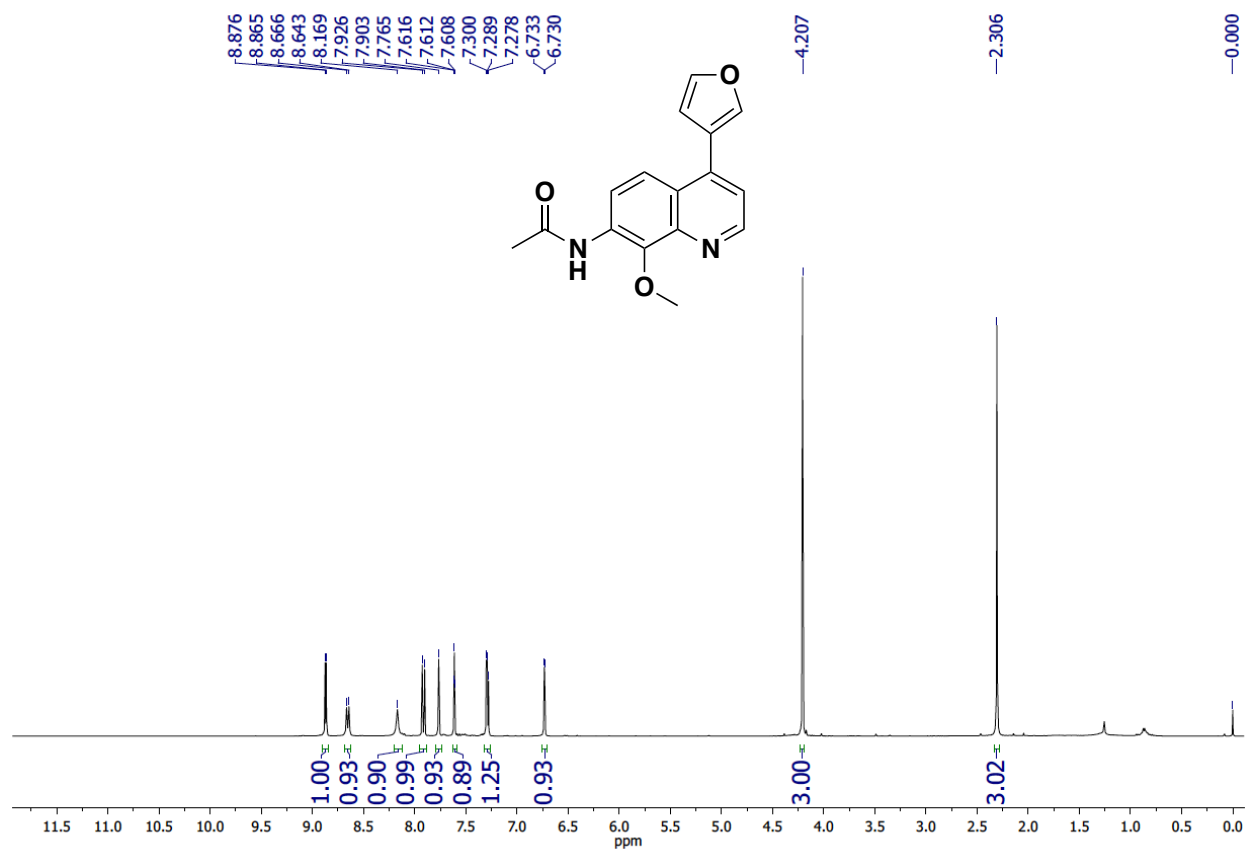

7-Acetamido-4-(3-furanyl)-8-methoxyquinoline (47) in CDCl<sub>3</sub>

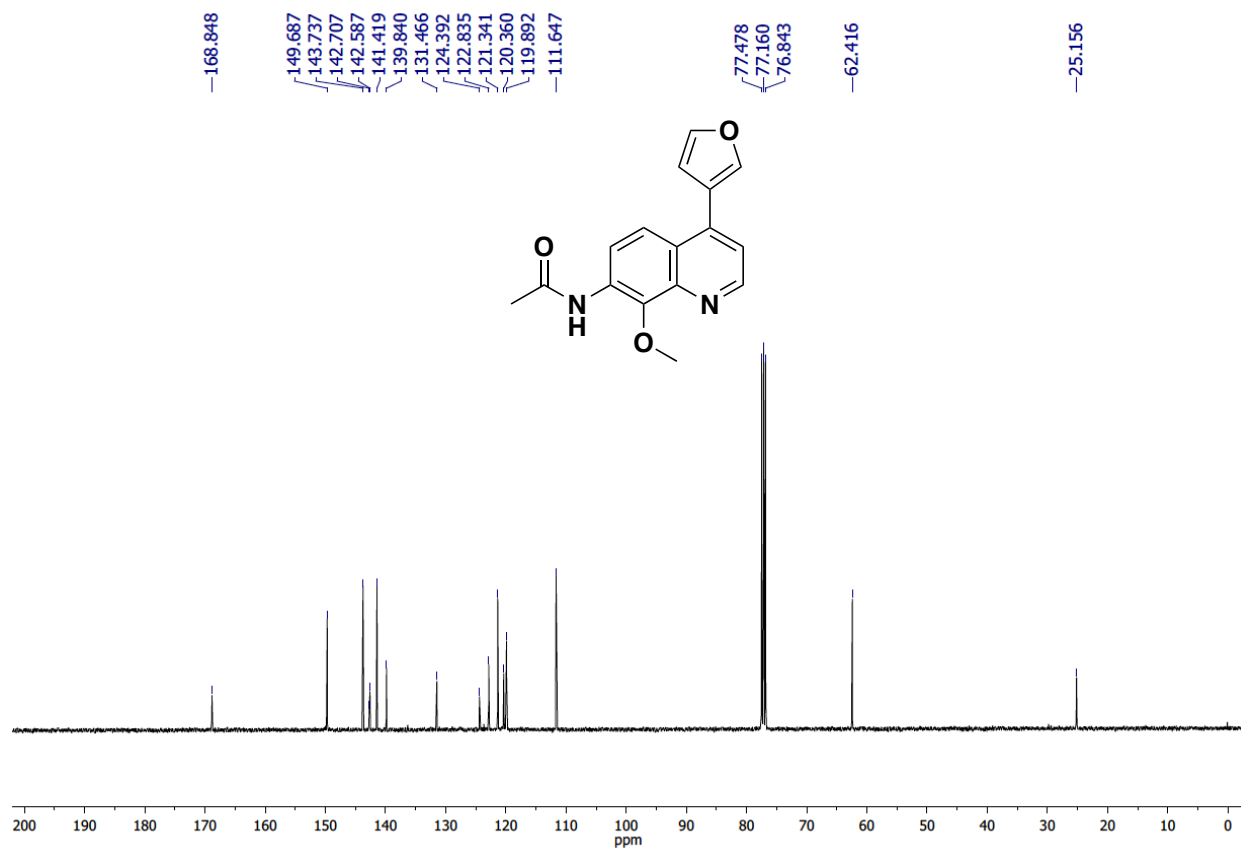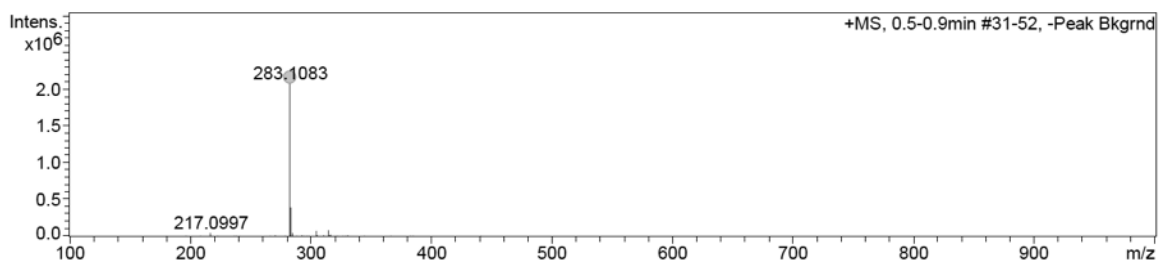

7-Acetamido-4-(3-furanyl)-8-methoxyquinoline (47)

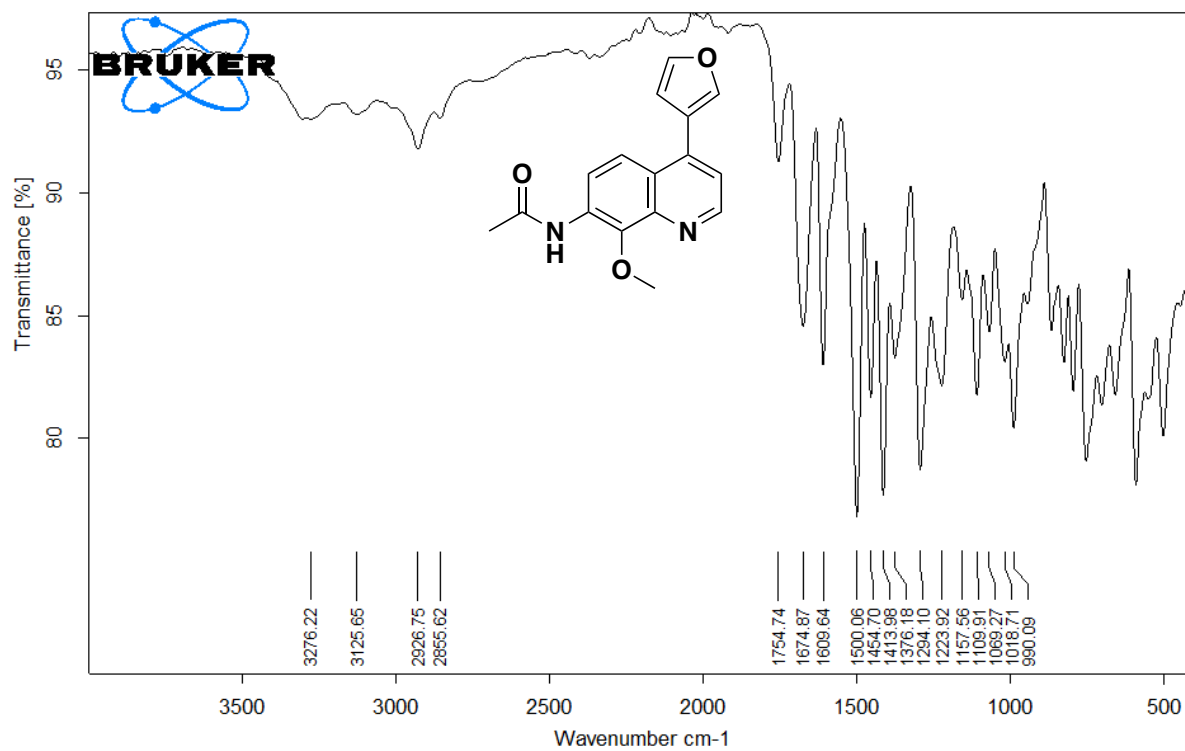

7-Acetamido-4-(thiophen-2-yl)-8-methoxyquinoline (48) in CDCl<sub>3</sub>

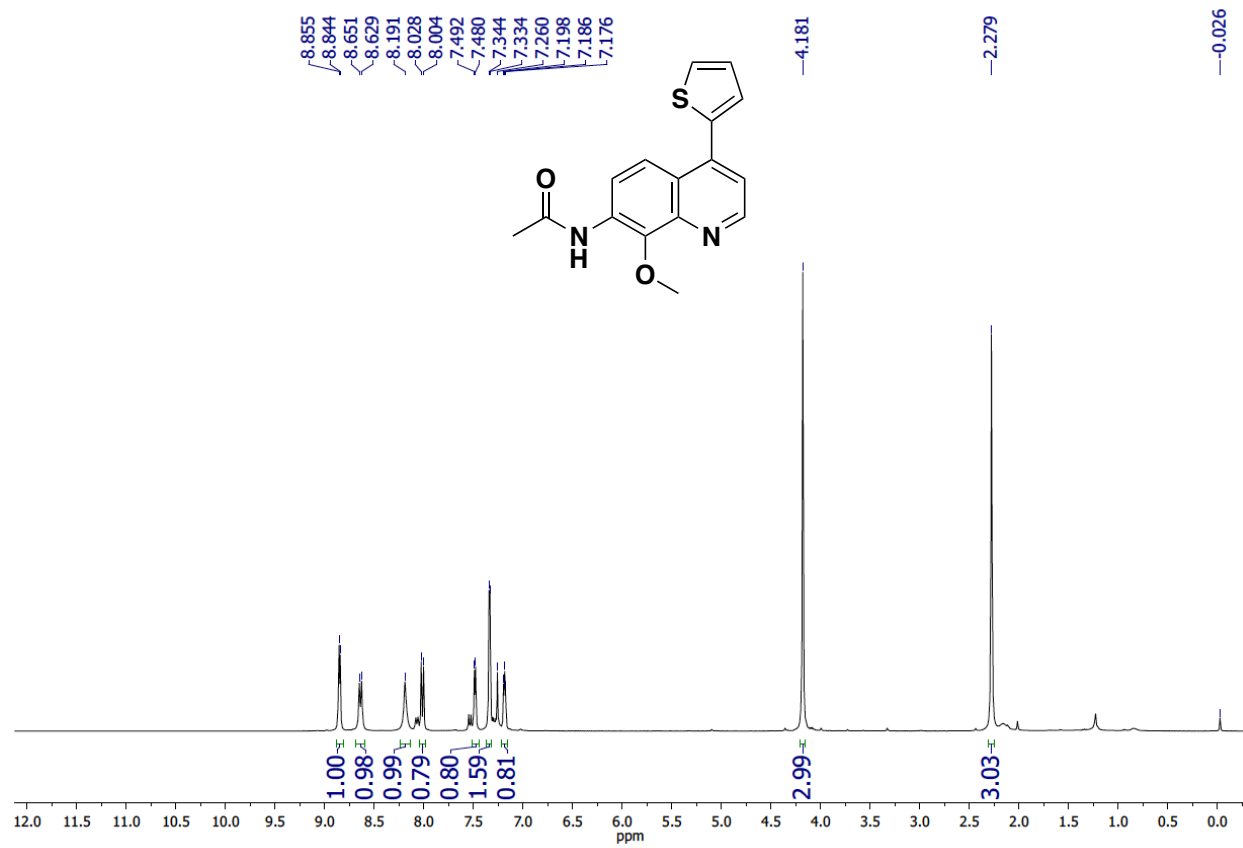



7-Acetamido-4-(thiophen-2-yl)-8-methoxyquinoline (48) in DMSO

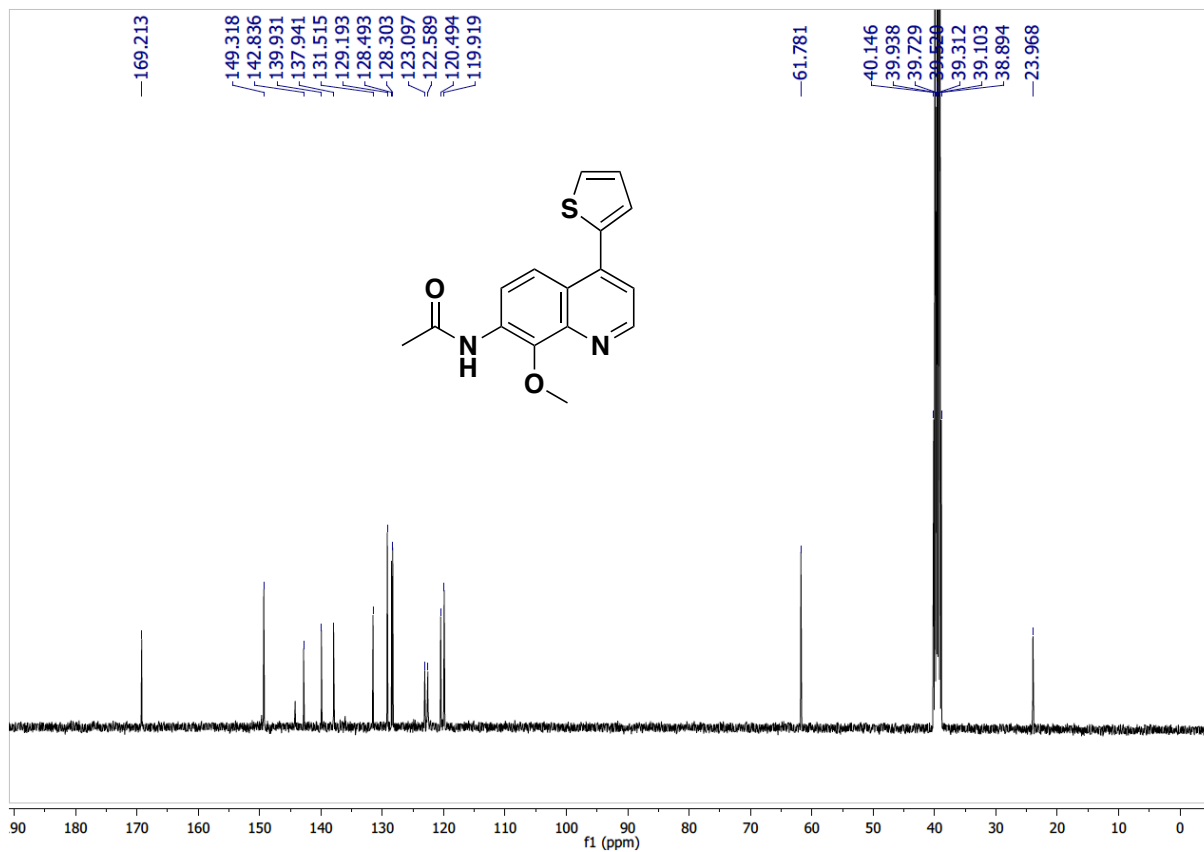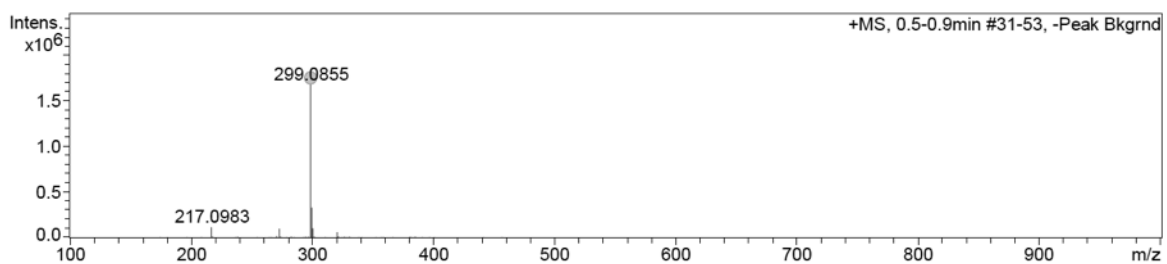

7-Acetamido-4-(thiophen-2-yl)-8-methoxyquinoline

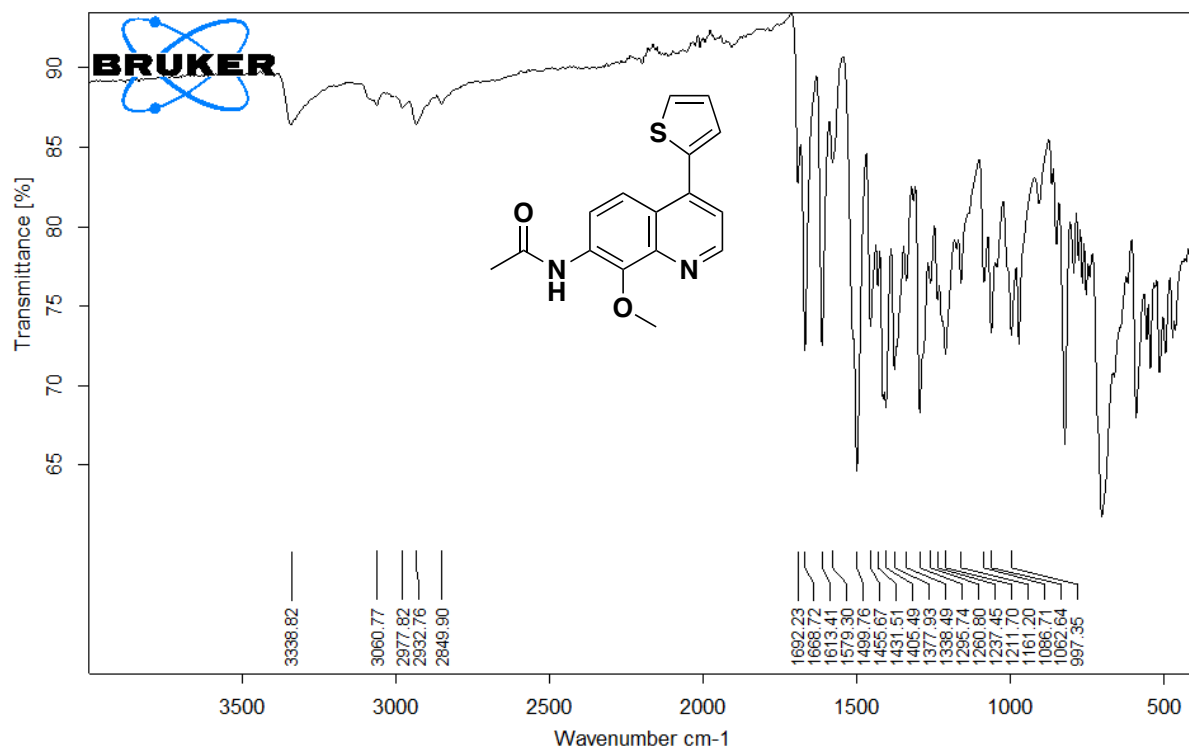

7-Acetamido-4-(thiophen-3-yl)-8-methoxyquinoline (49) in CDCl<sub>3</sub>

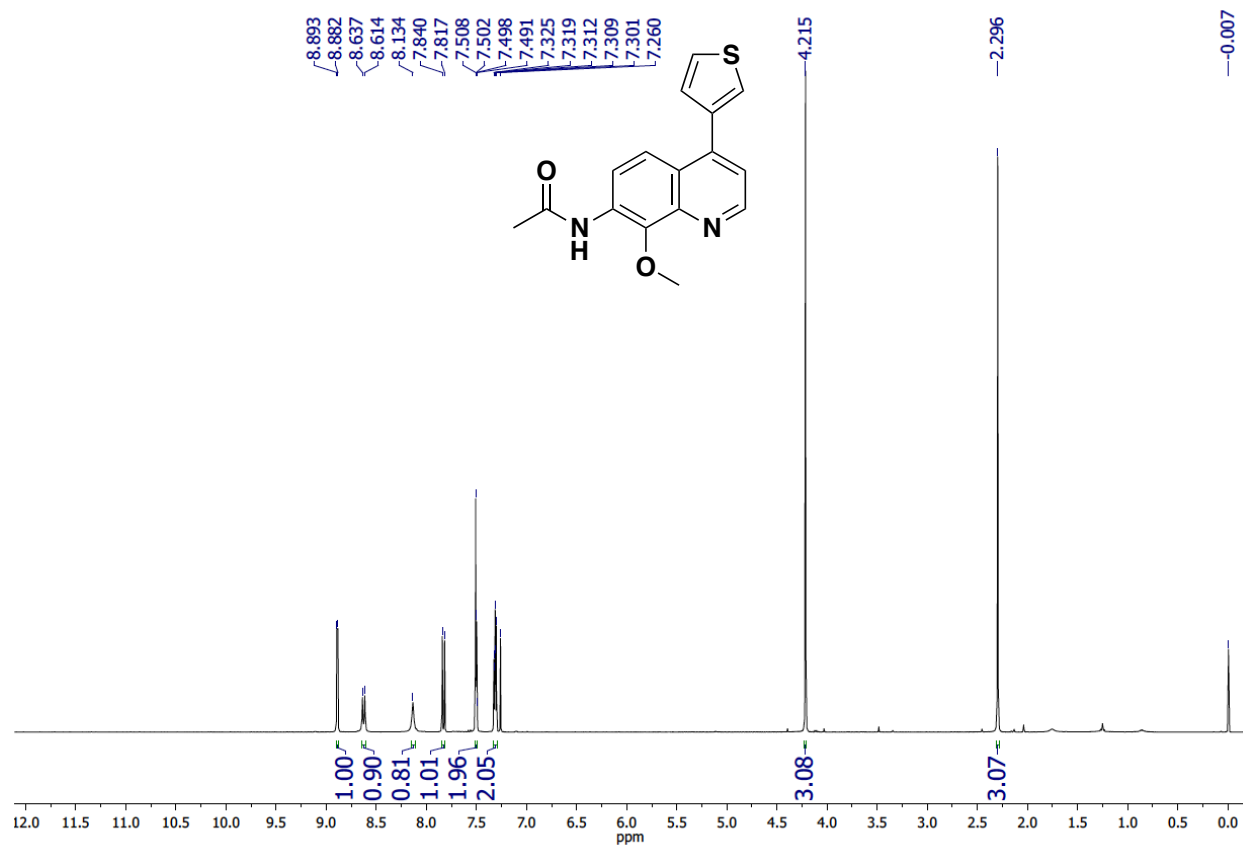

7-Acetamido-4-(thiophen-3-yl)-8-methoxyquinoline (49) in CDCl<sub>3</sub>

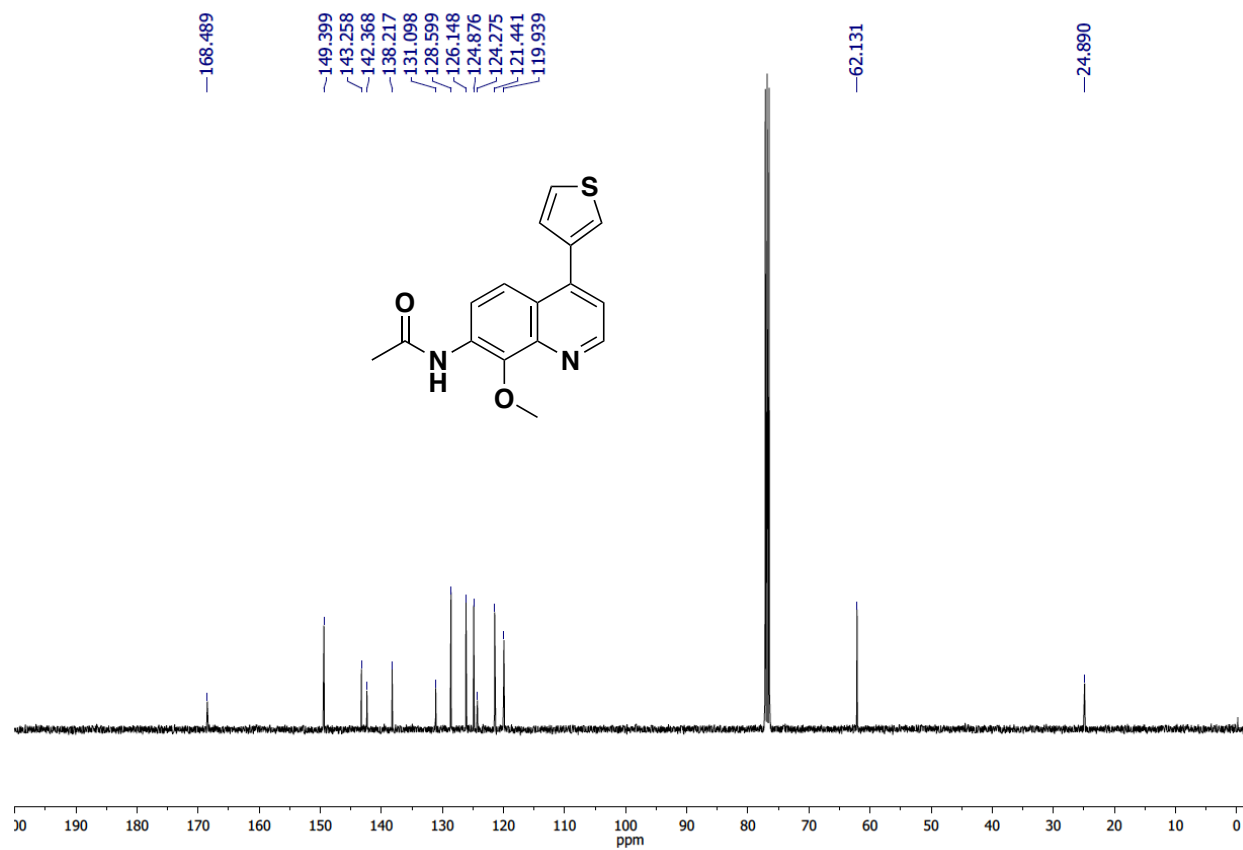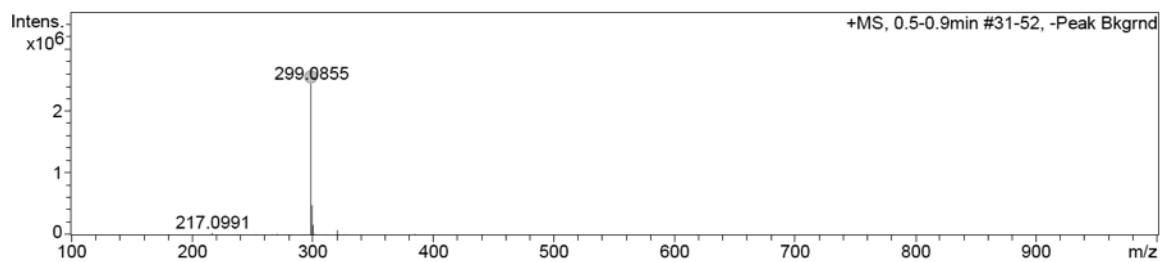

### 7-Acetamido-4-(thiophen-3-yl)-8-methoxyquinoline

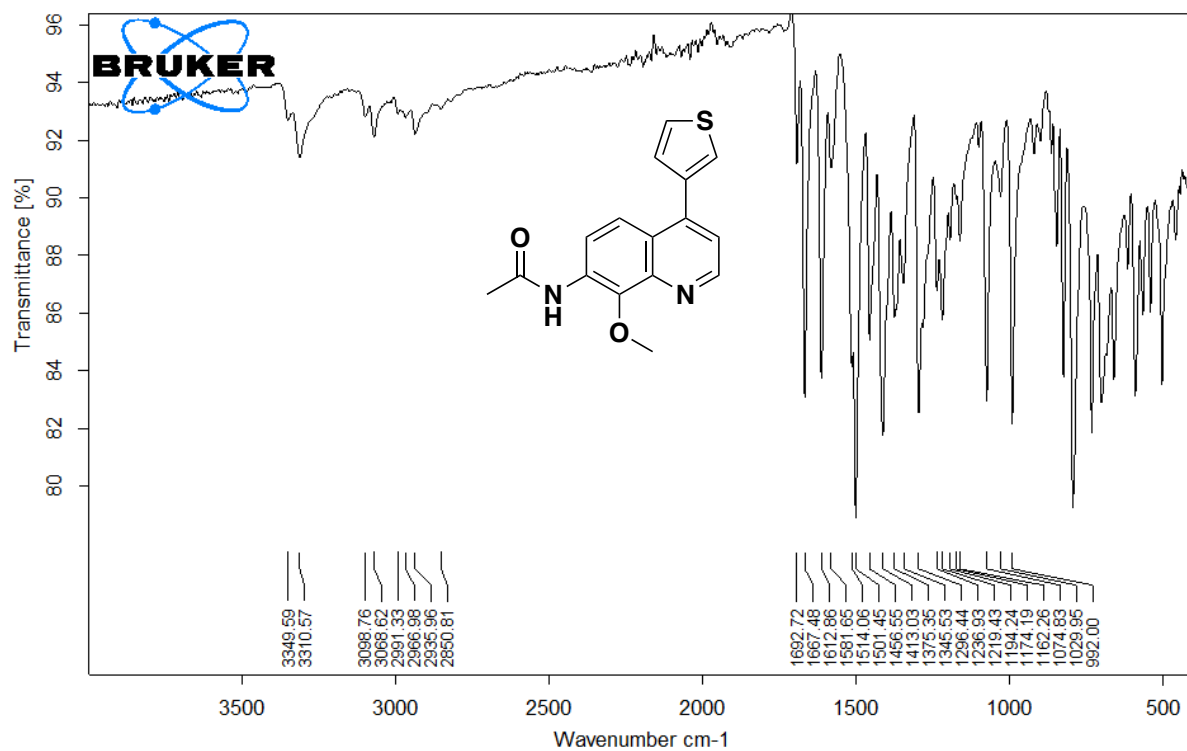

7-Acetamido-4-(5-pyrimidinyl)-8-methoxyquinoline (50) in CDCl<sub>3</sub>

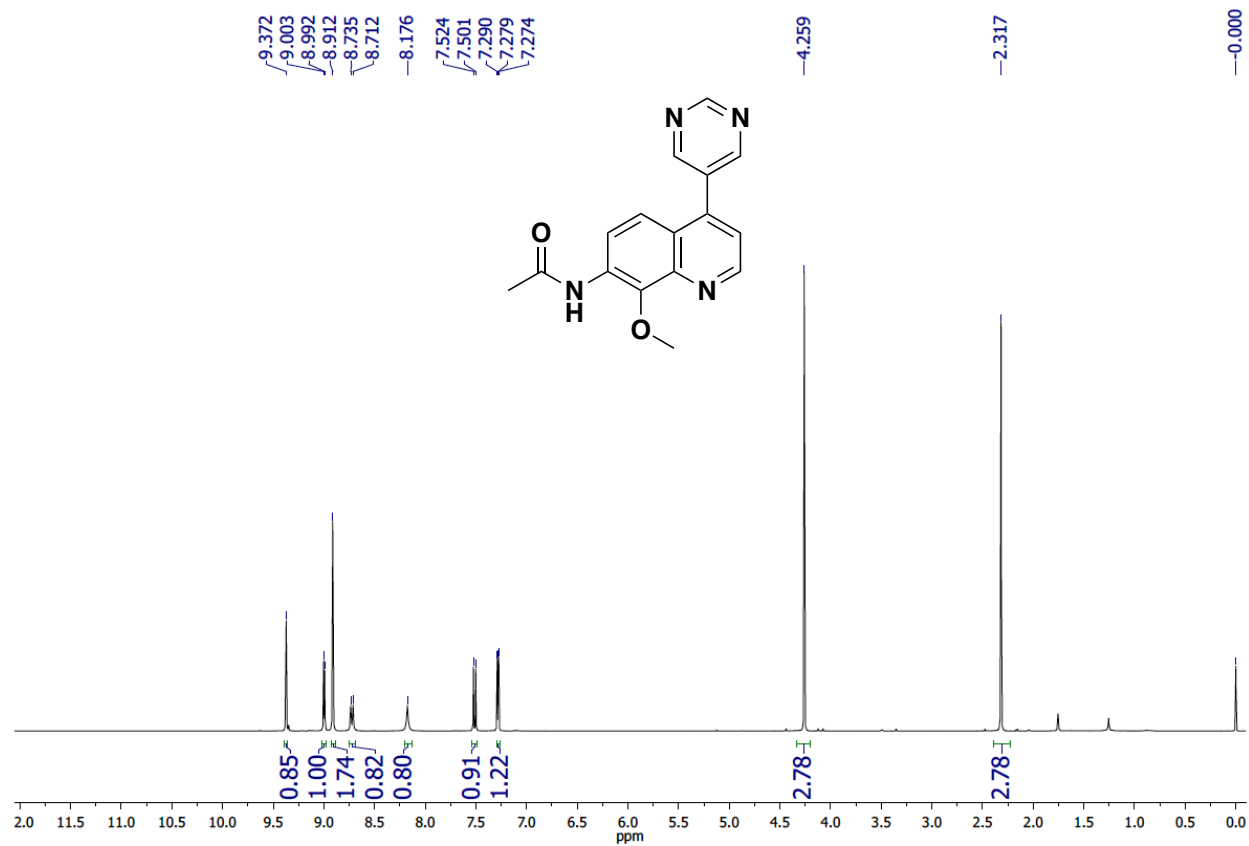

7-Acetamido-4-(5-pyrimidinyl)-8-methoxyquinoline (50) in CDCl<sub>3</sub>

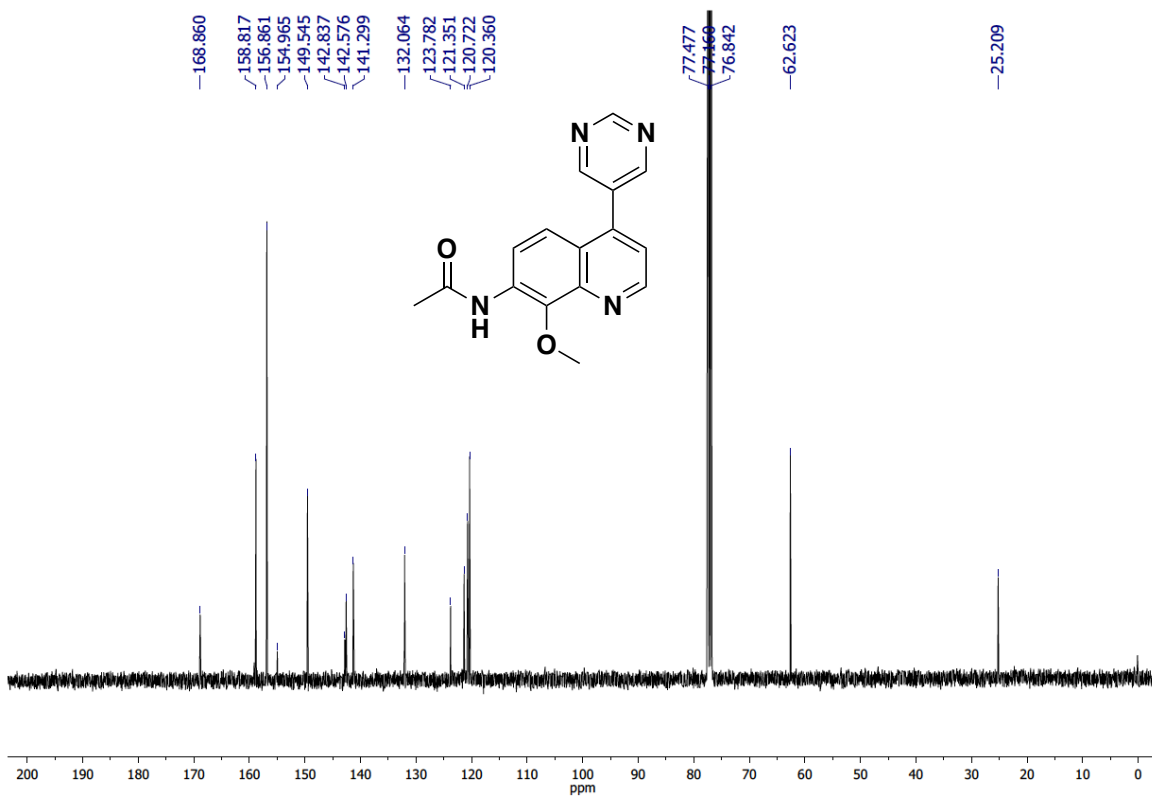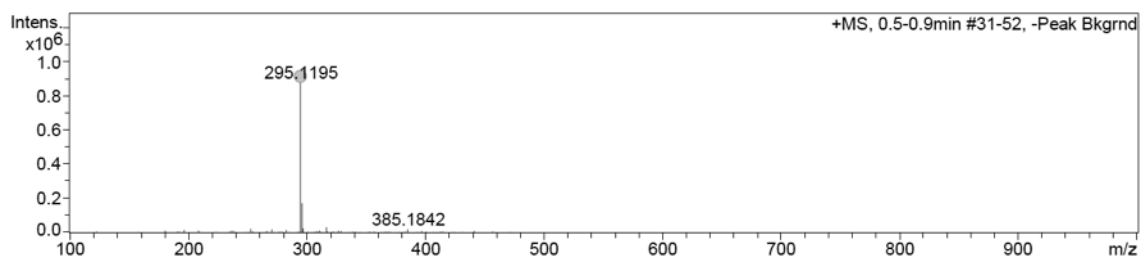

7-Acetamido-4-(5-pyrimidinyl)-8-methoxyquinoline (50)

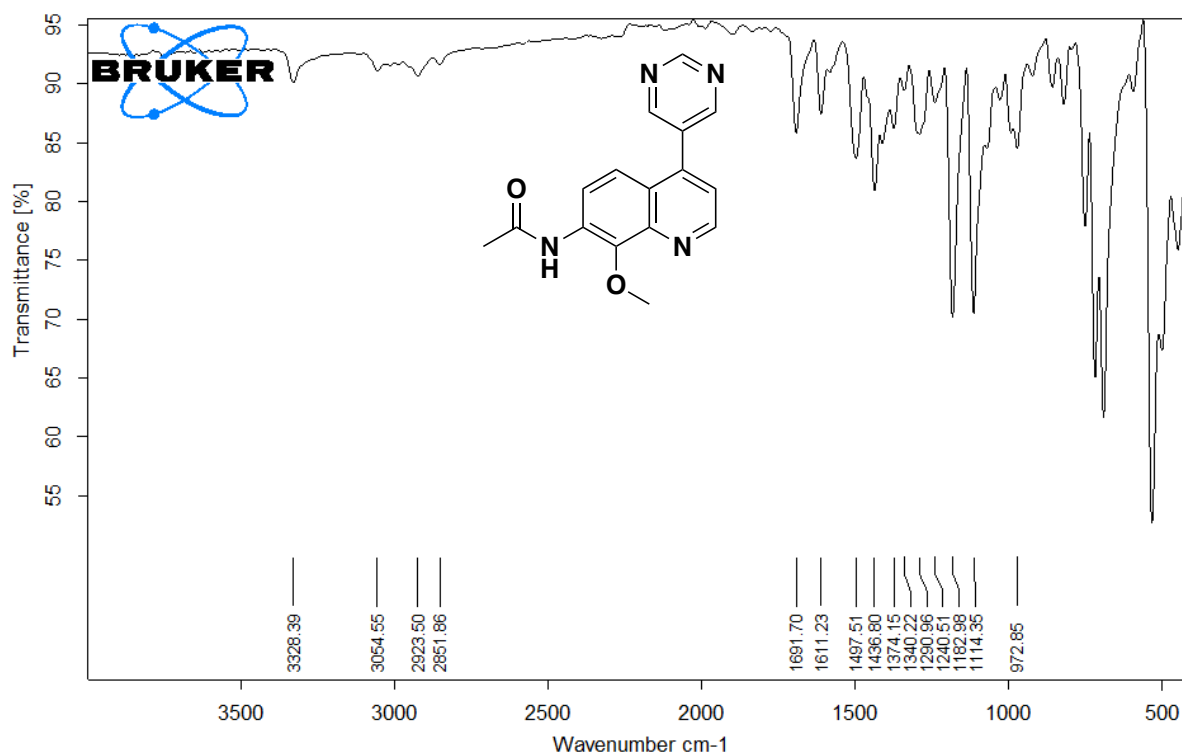



4-(2-benzofuranyl)-8-methoxy-7-(2-(morpholin-4-yl)acetamido)quinoline (51) in CDCl<sub>3</sub>

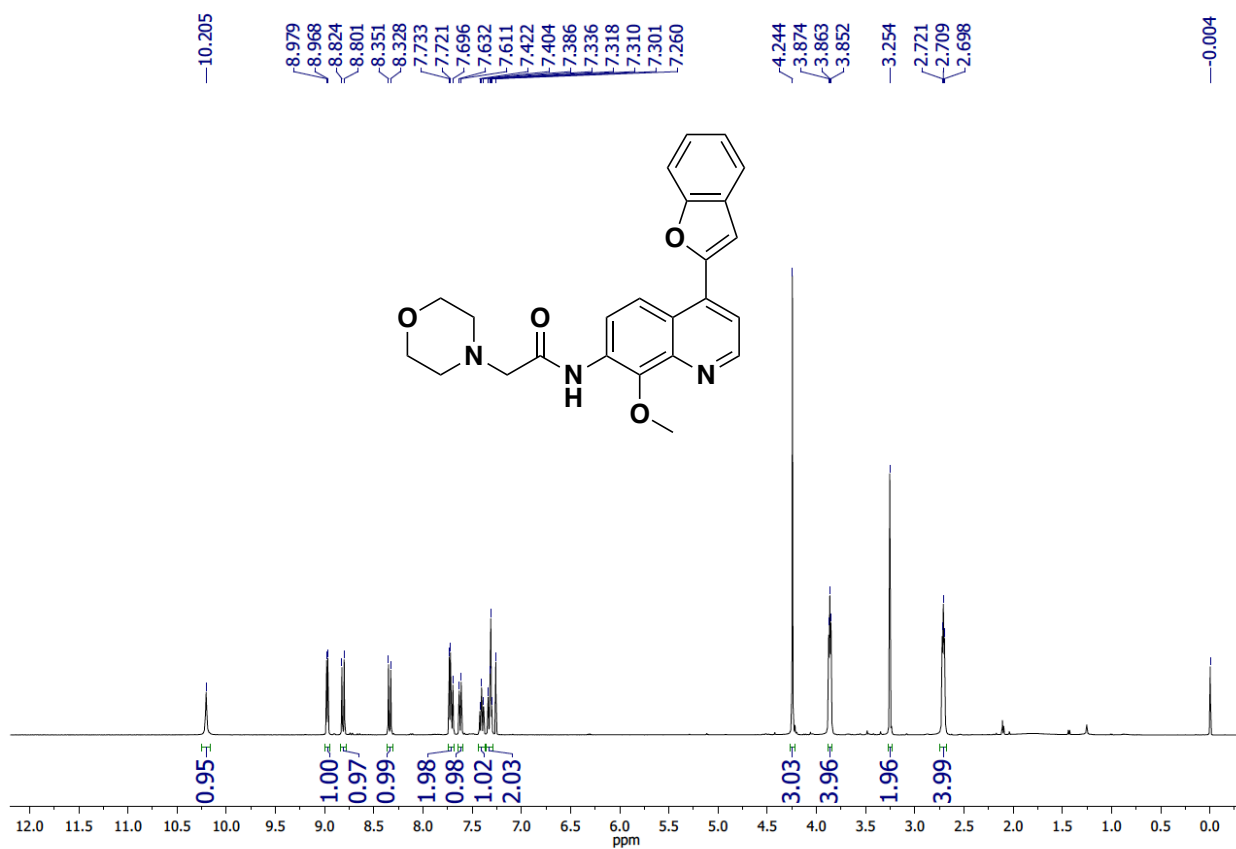

4-(2-benzofuranyl)-8-methoxy-7-(2-(morpholin-4-yl)acetamido)quinoline (51) in CDCl<sub>3</sub>

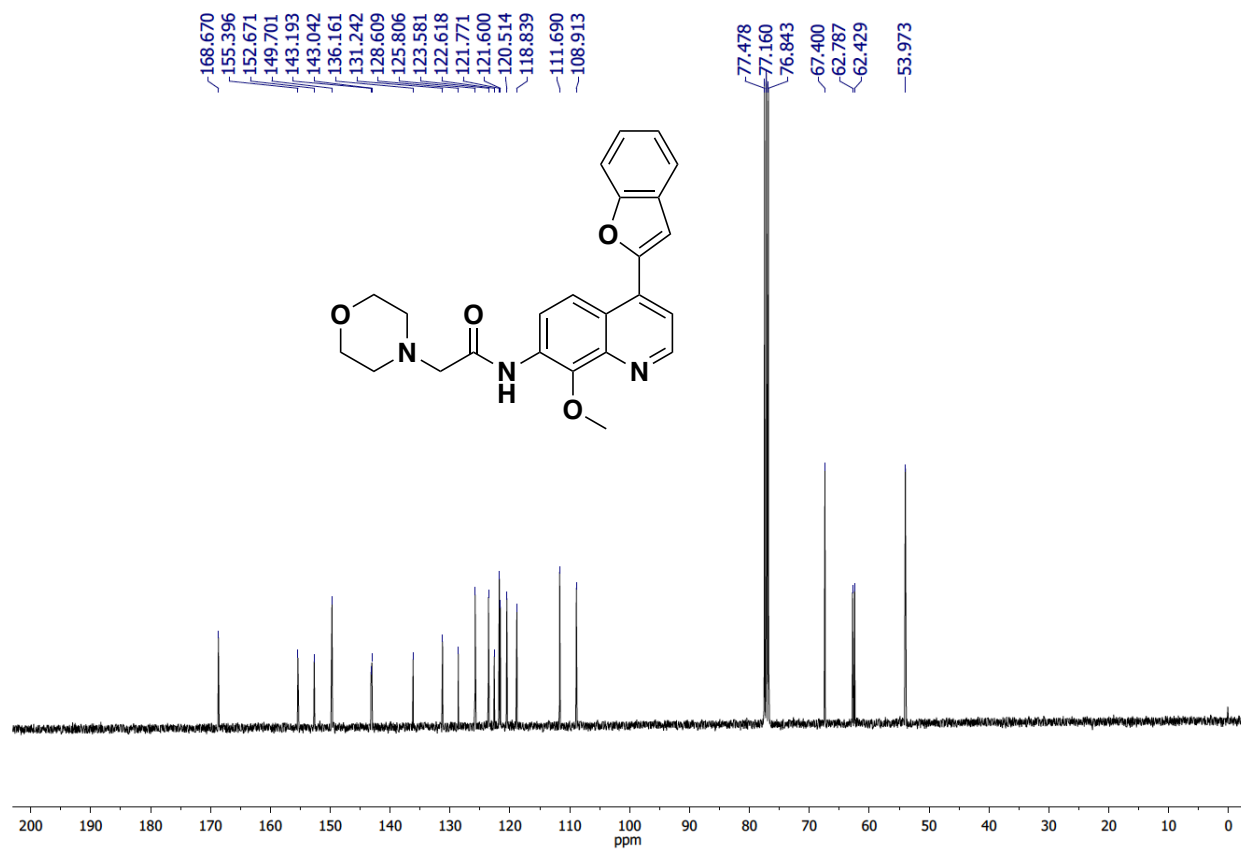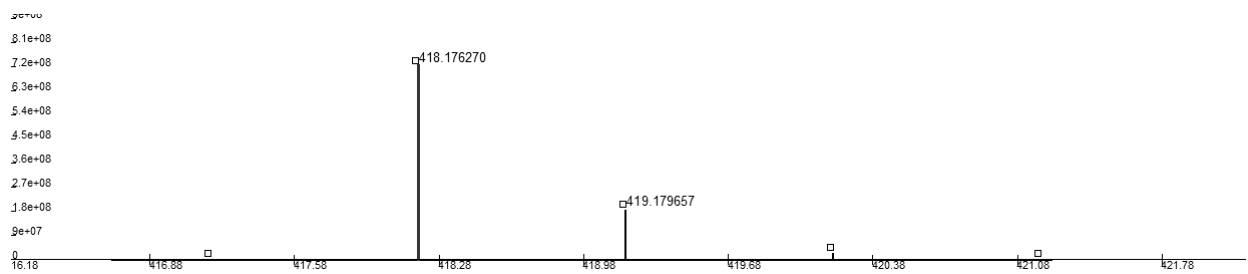

4-(2-benzofuranyl)-8-methoxy-7-(2-(morpholin-4-yl)acetamido)quinoline (51)

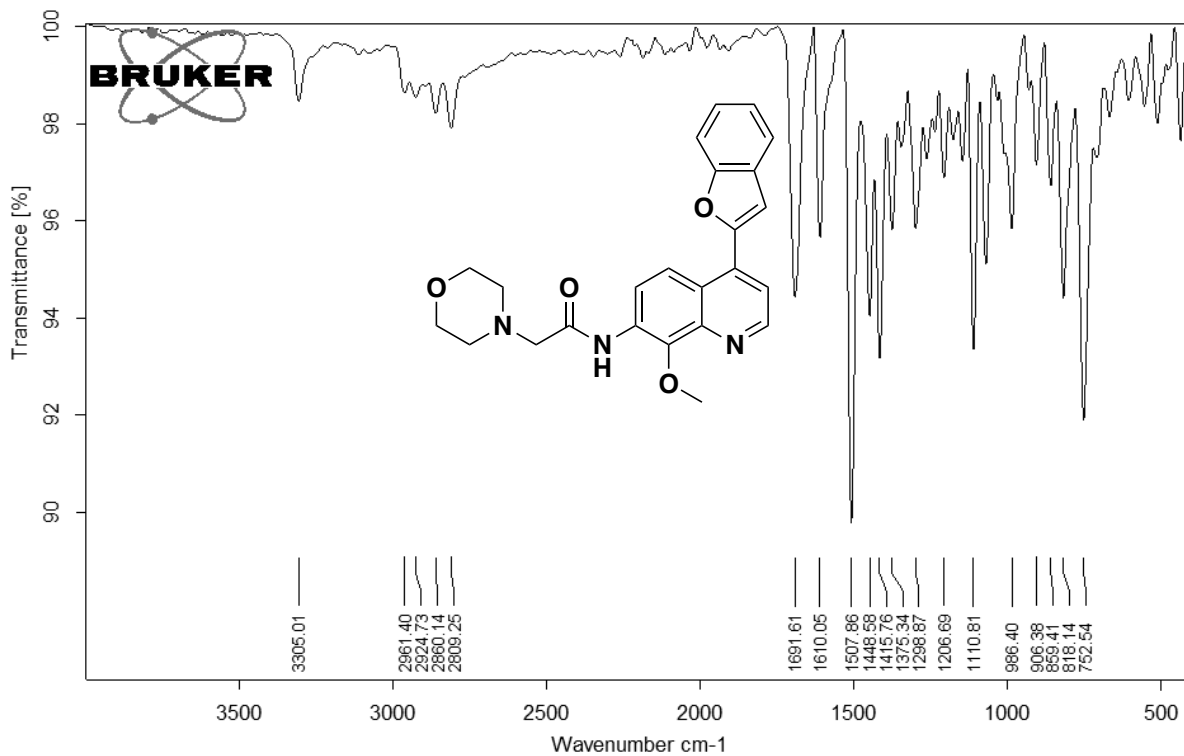

4-(2-benzofuranyl)-8-methoxy-7-(3-(morpholin-4-yl)propanamido)quinoline (52) in CDCl<sub>3</sub>

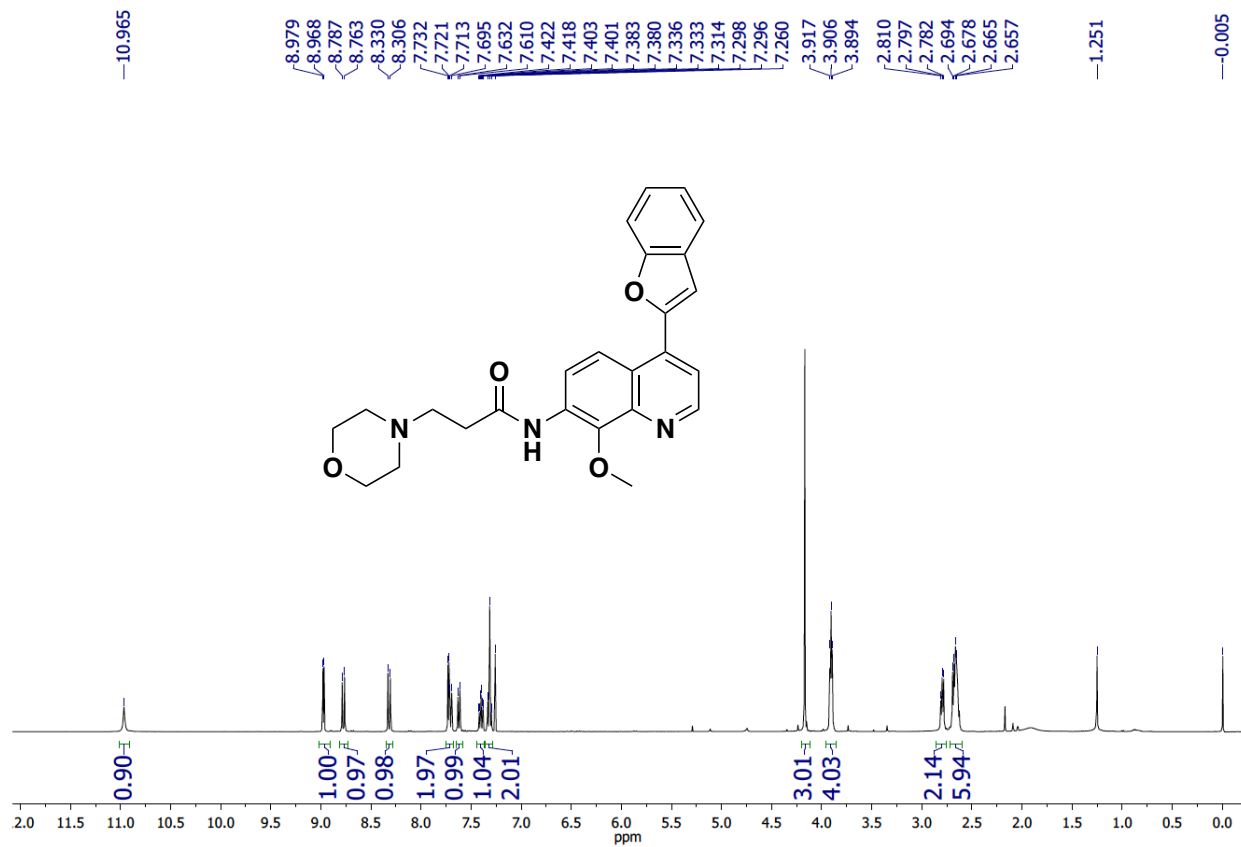

4-(2-benzofuranyl)-8-methoxy-7-(3-(morpholin-4-yl)propanamido)quinoline (52) in CDCl<sub>3</sub>

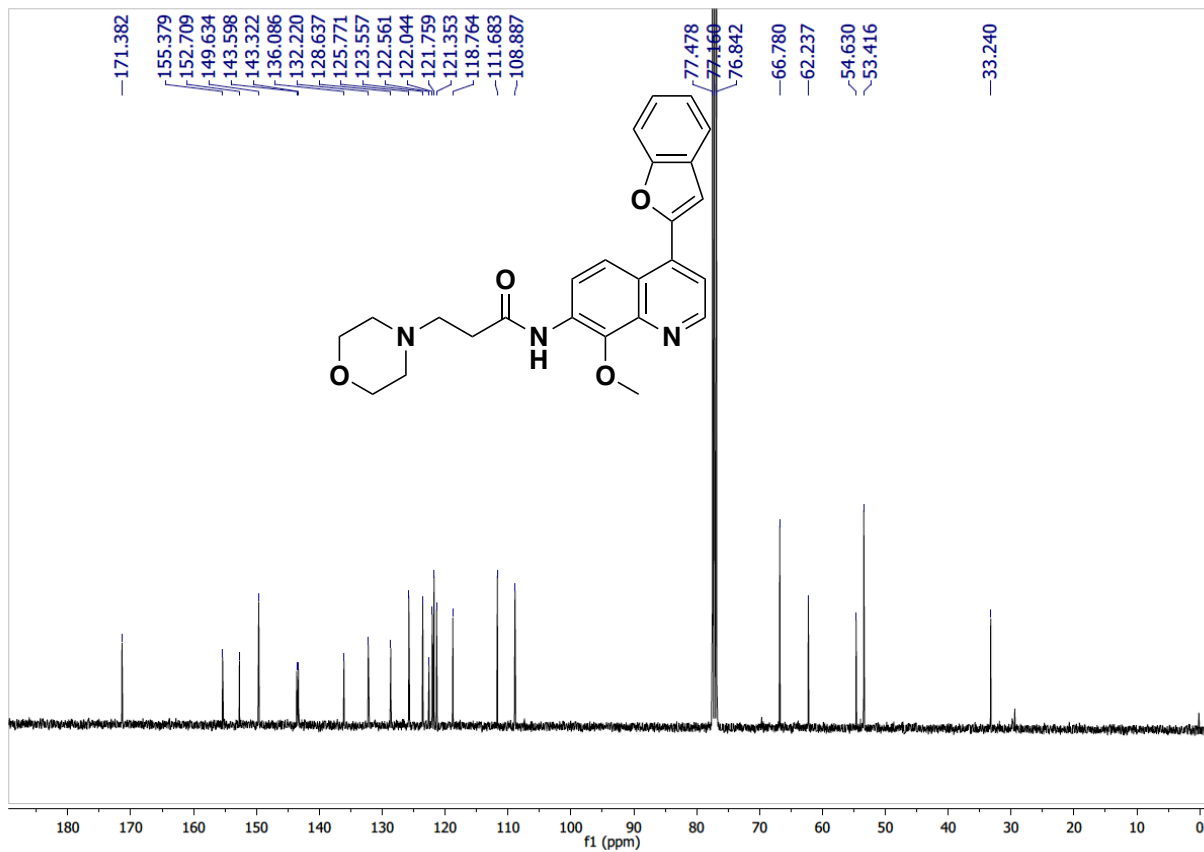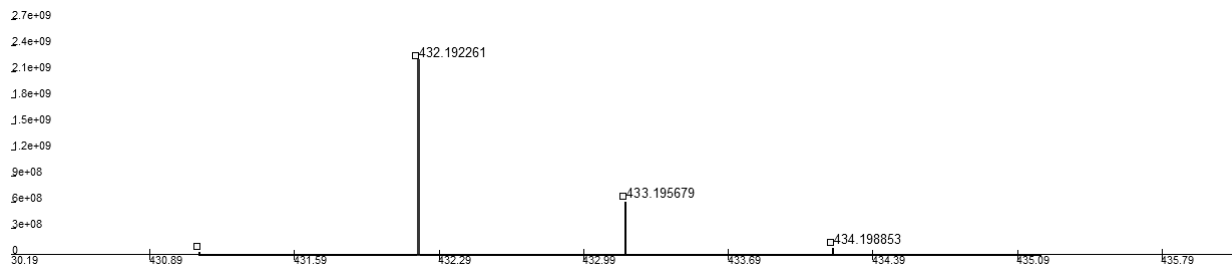

4-(2-benzofuranyl)-8-methoxy-7-(3-(morpholin-4-yl)propanamido)quinoline (52)

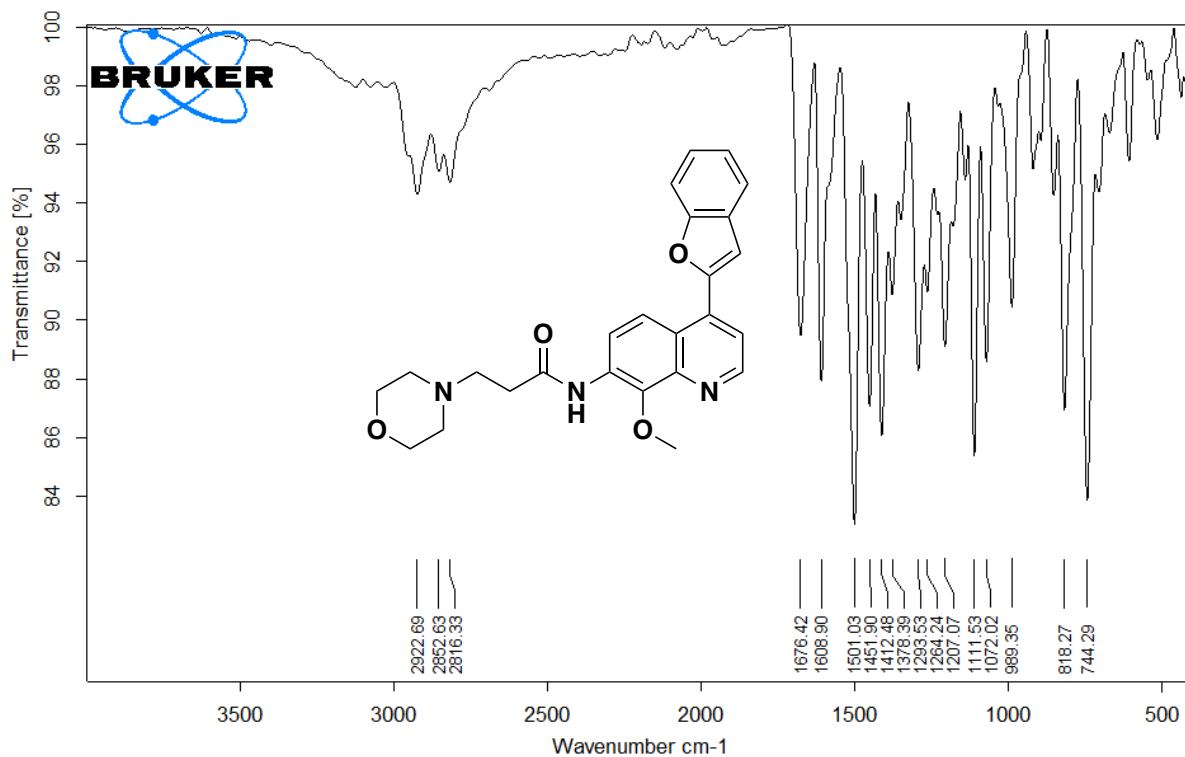

7-Acetamido-4-(2-benzofuranyl)-8-hydroxyquinoline (53) in DMSO-d<sub>6</sub>

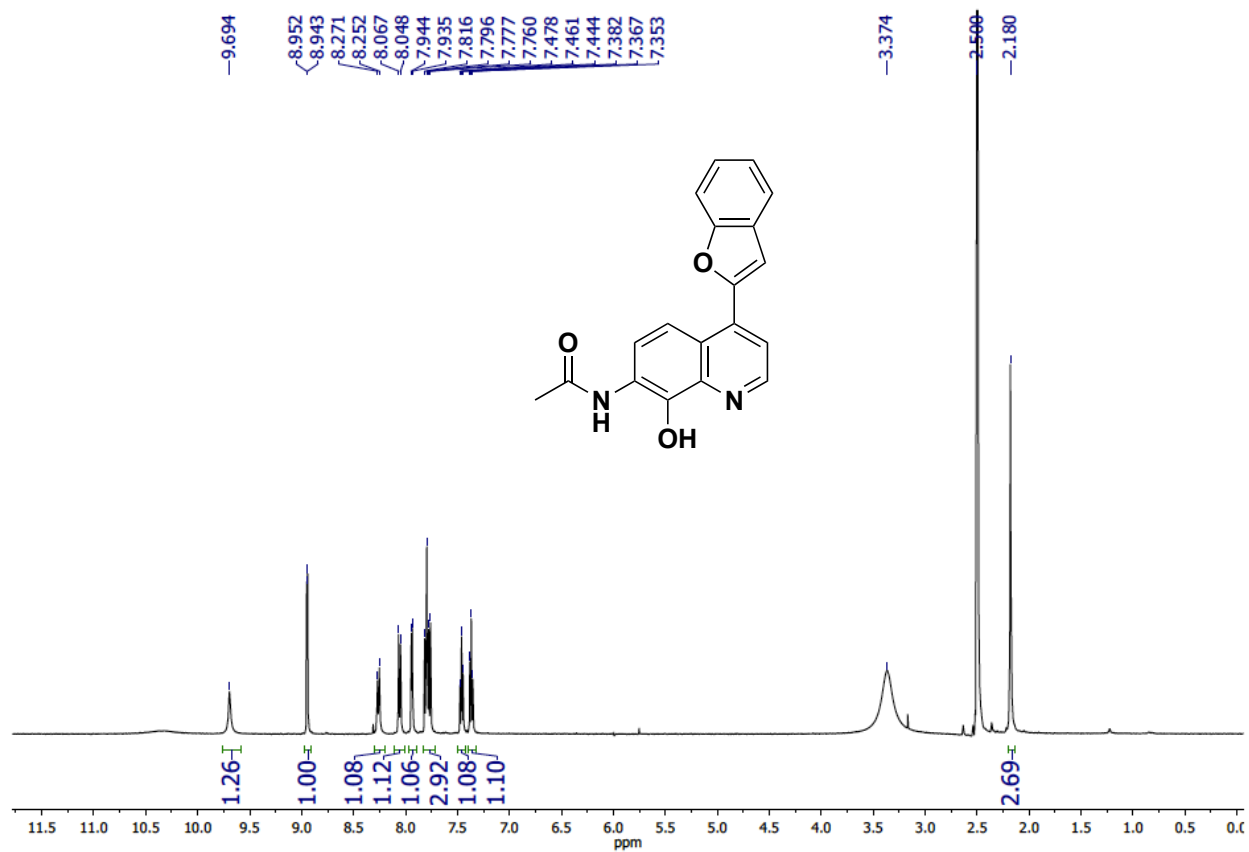

7-Acetamido-4-(2-benzofuranyl)-8-hydroxyquinoline (53) in DMSO-d<sub>6</sub>

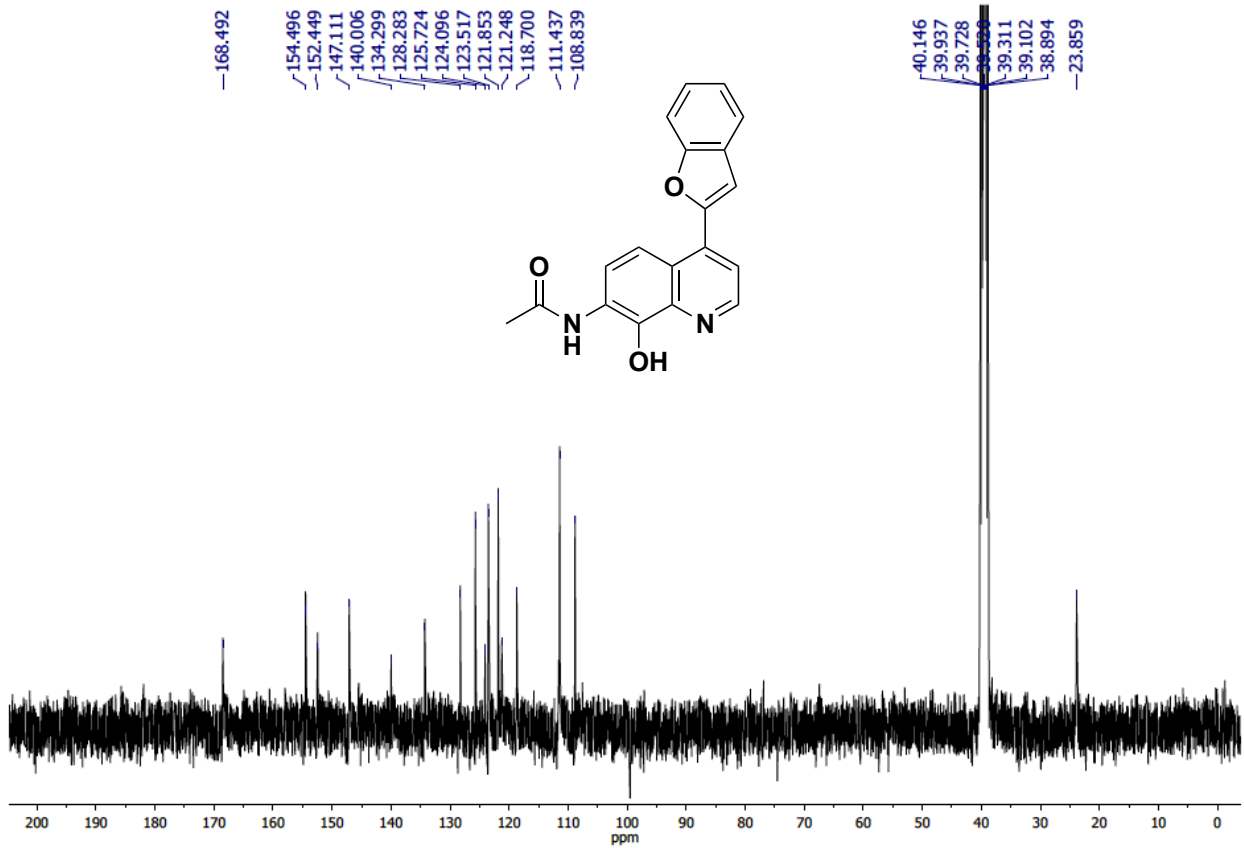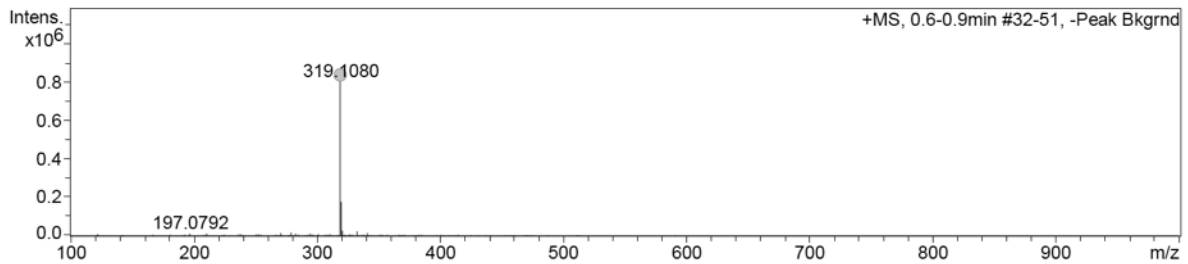



7-Acetamido-4-(2-benzofuranyl)-8-hydroxyquinoline (53)

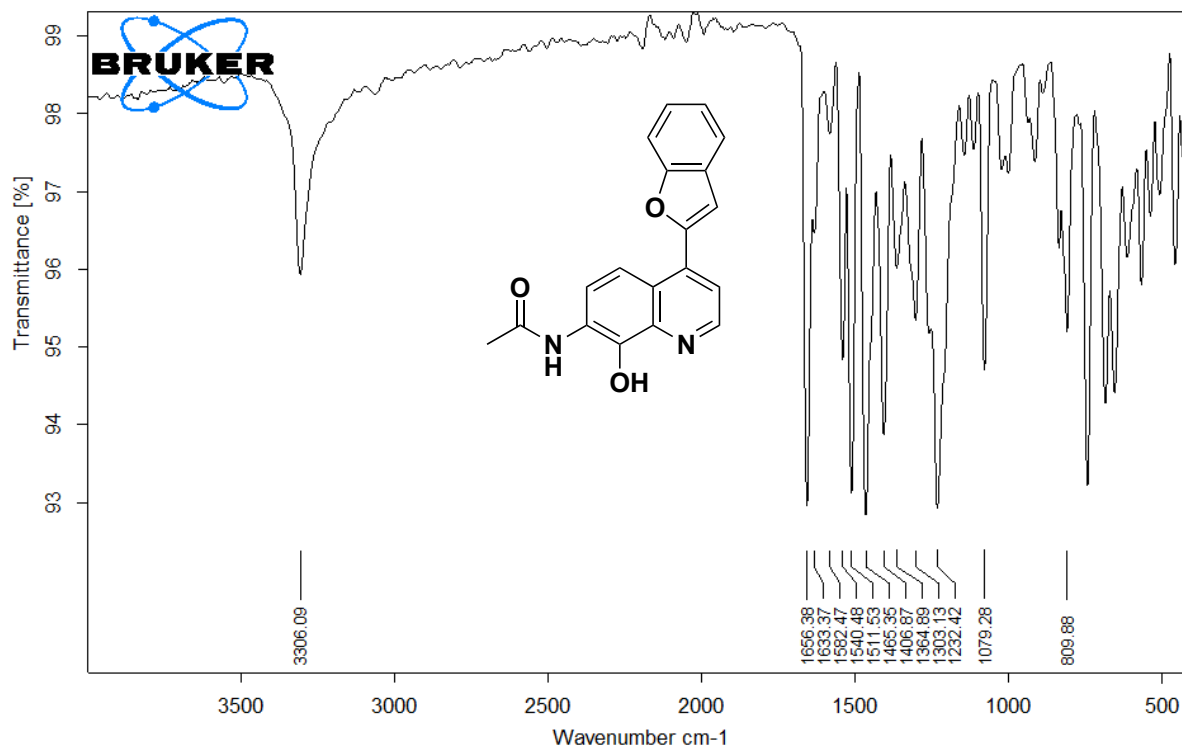

7- Acetamido-4-(benzo[b]thiophen-2-yl)-8-hydroxyquinoline (54) in DMSO-d<sub>6</sub>

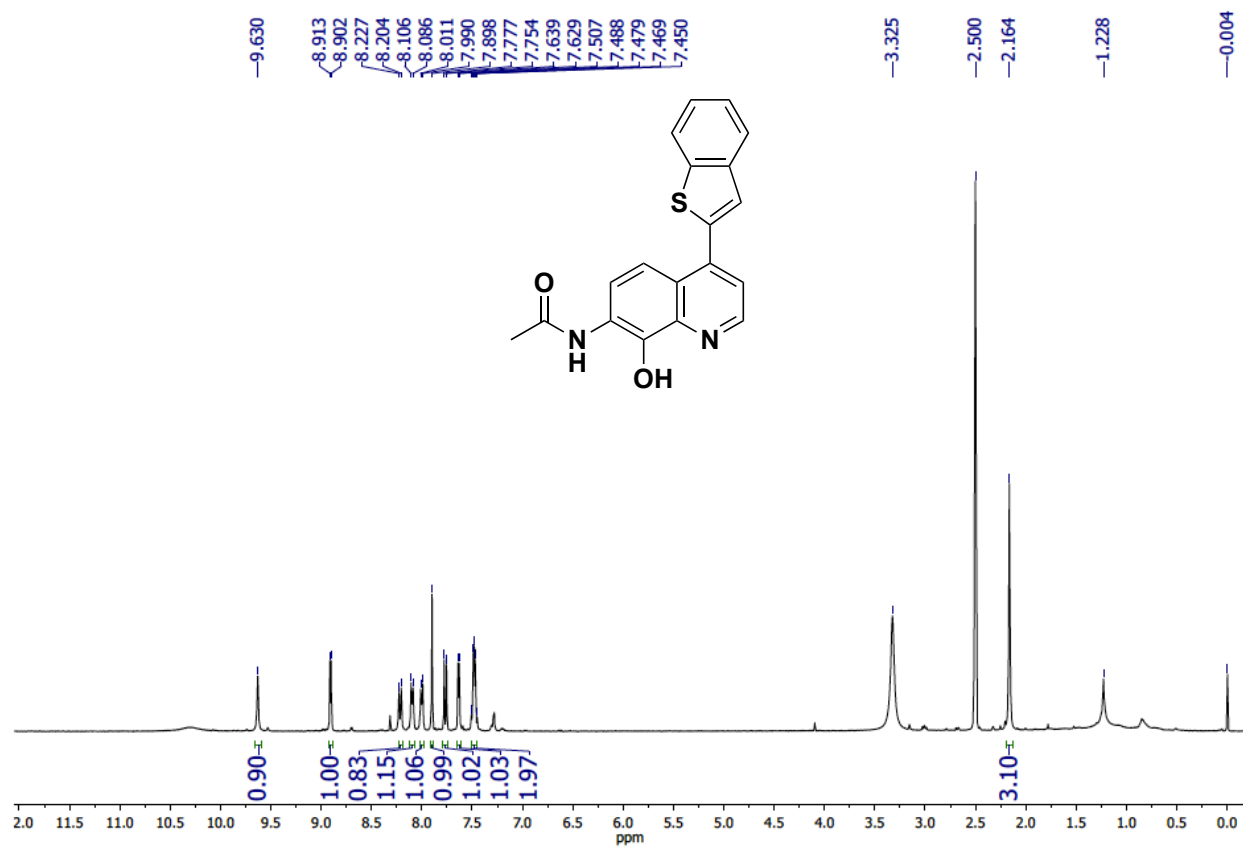

7-Acetamido-4-(benzo[b]thiophen-2-yl)-8-hydroxyquinoline (54) in DMSO-d<sub>6</sub>

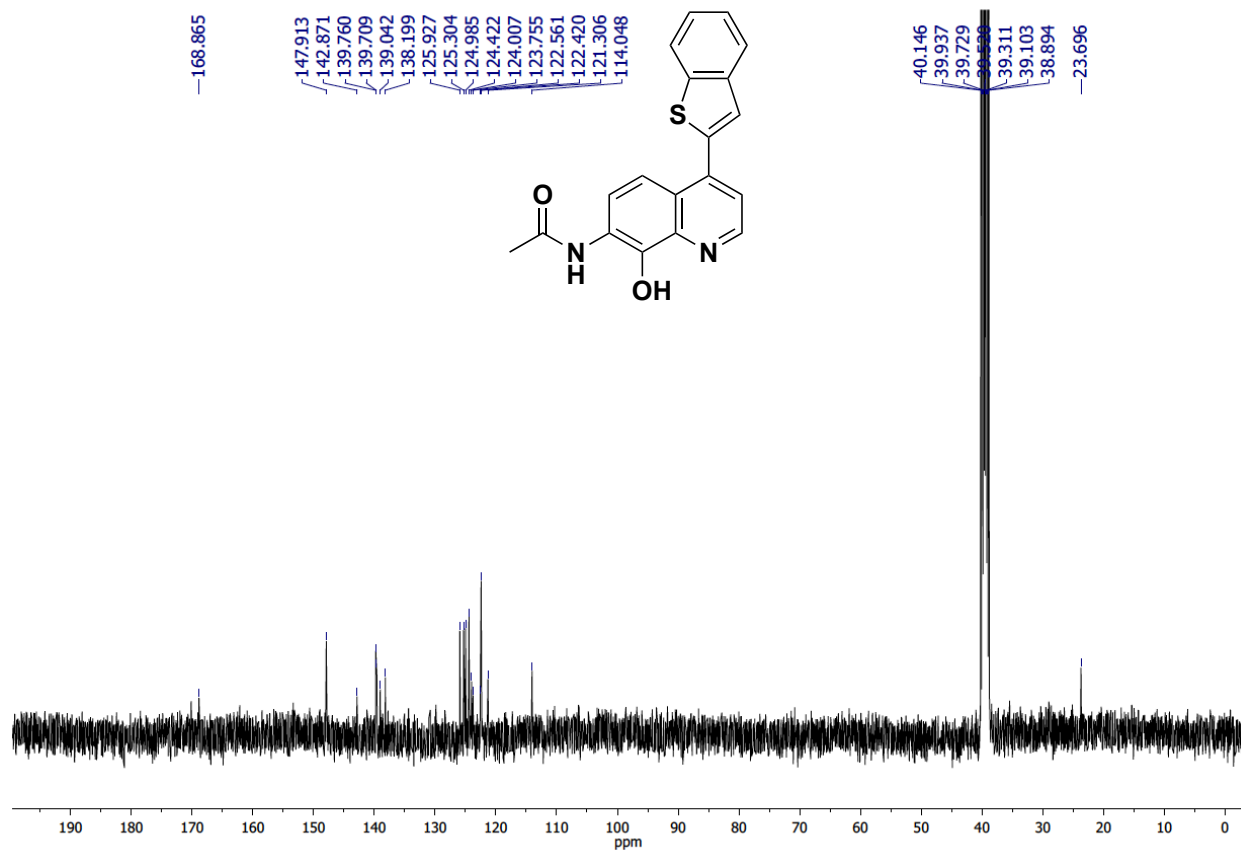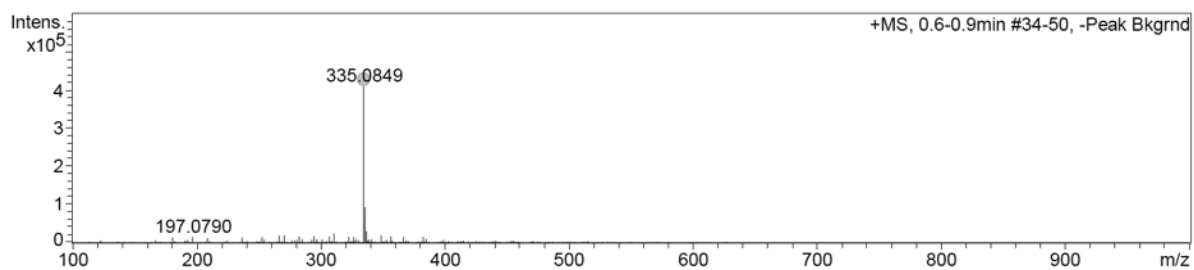

7-Acetamido-4-(benzo[b]thiophen-2-yl)-8-hydroxyquinoline (54)

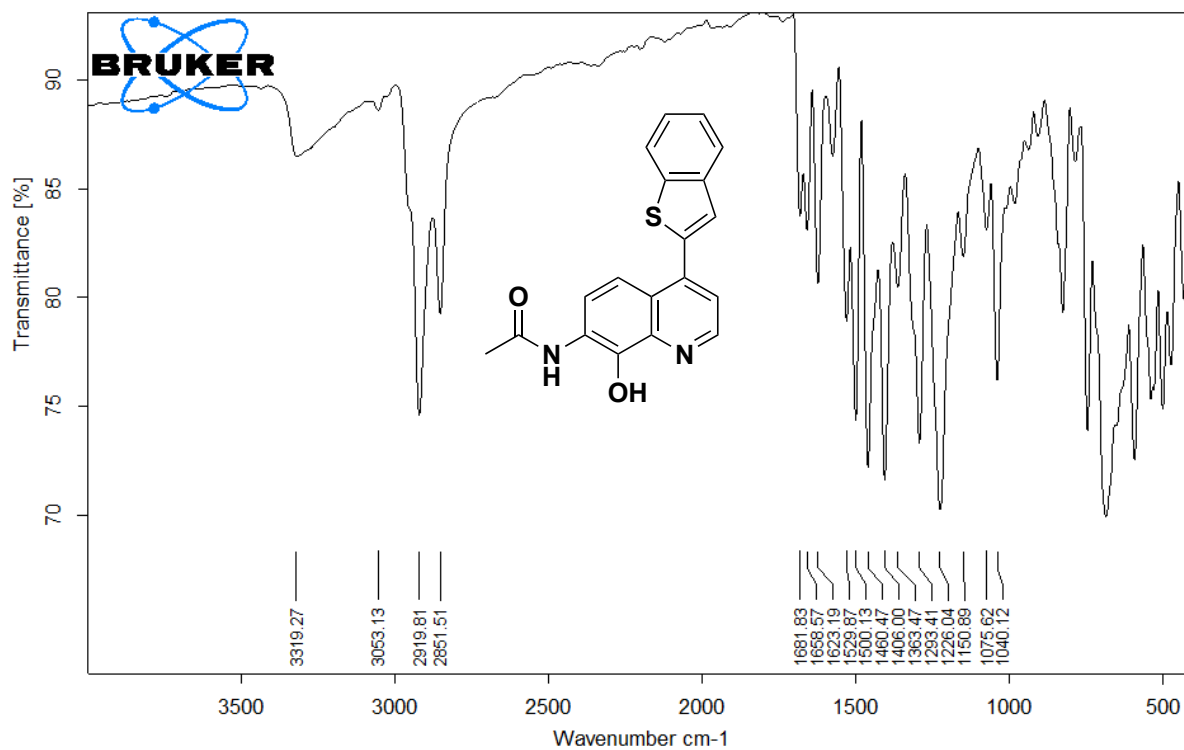

7-Acetamido-4-(2-furanyl)-8-hydroxyquinoline (55) in DMSO-d<sub>6</sub>

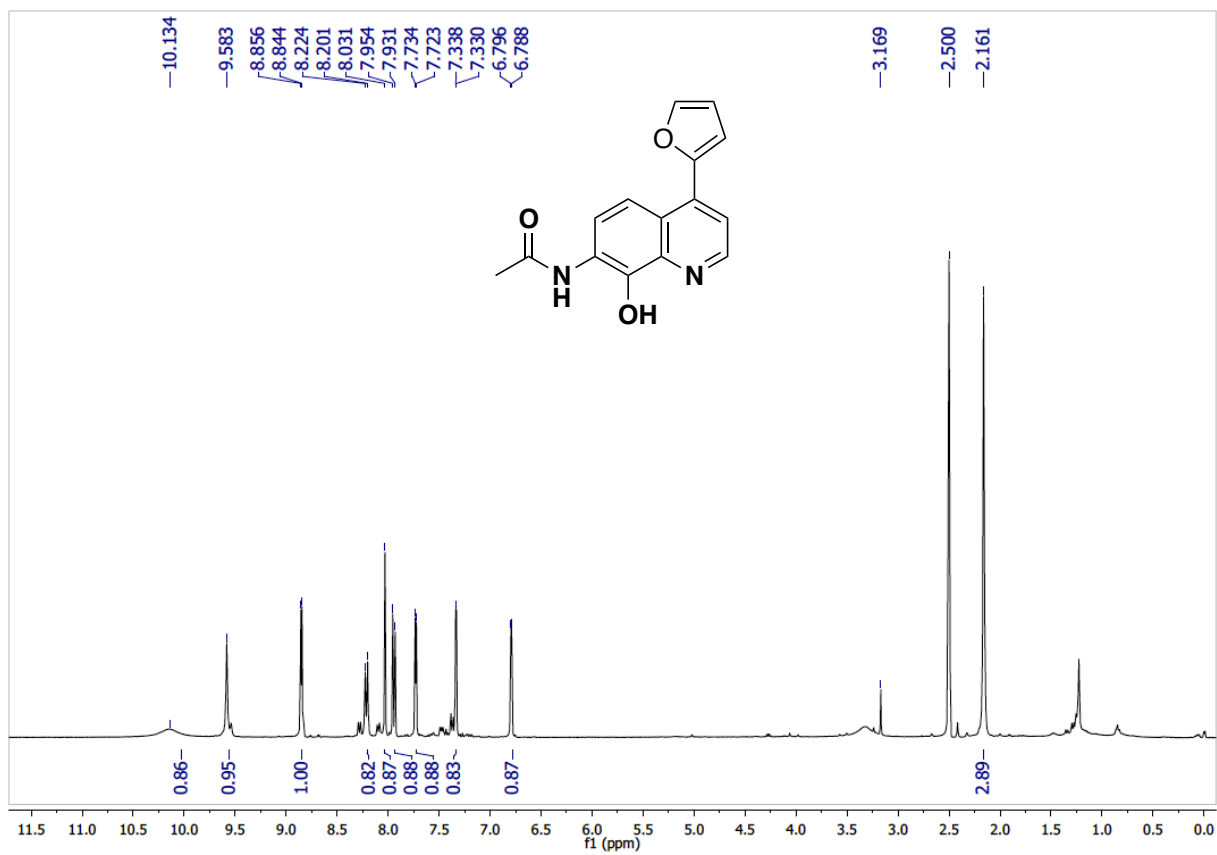

7-Acetamido-4-(2-furanyl)-8-hydroxyquinoline (55) in DMSO-d<sub>6</sub>

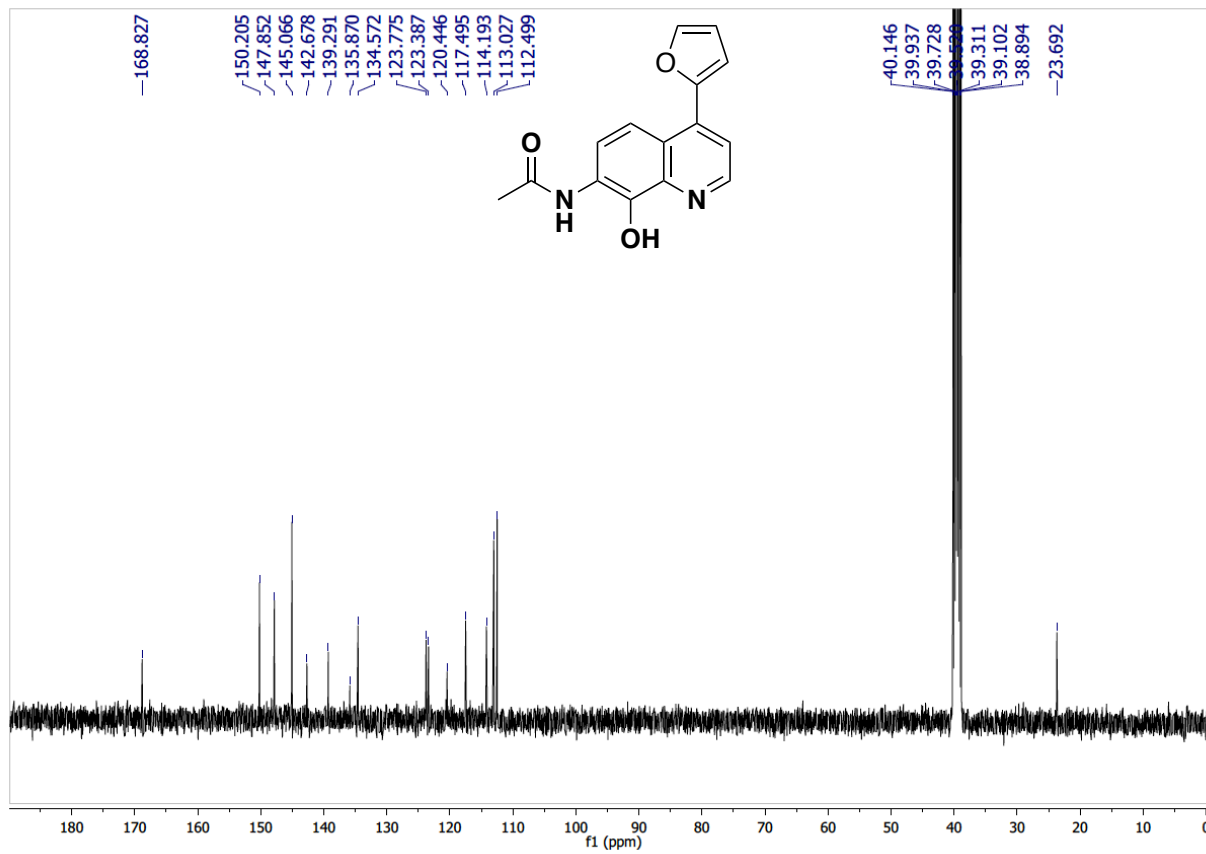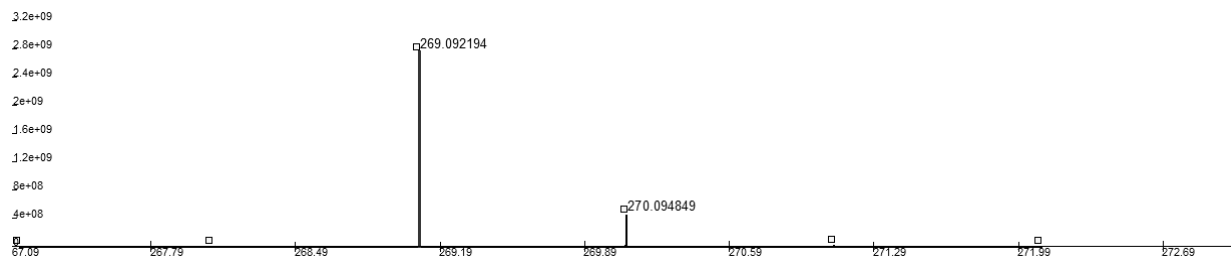

7-Acetamido-4-(2-furanyl)-8-hydroxyquinoline (55)

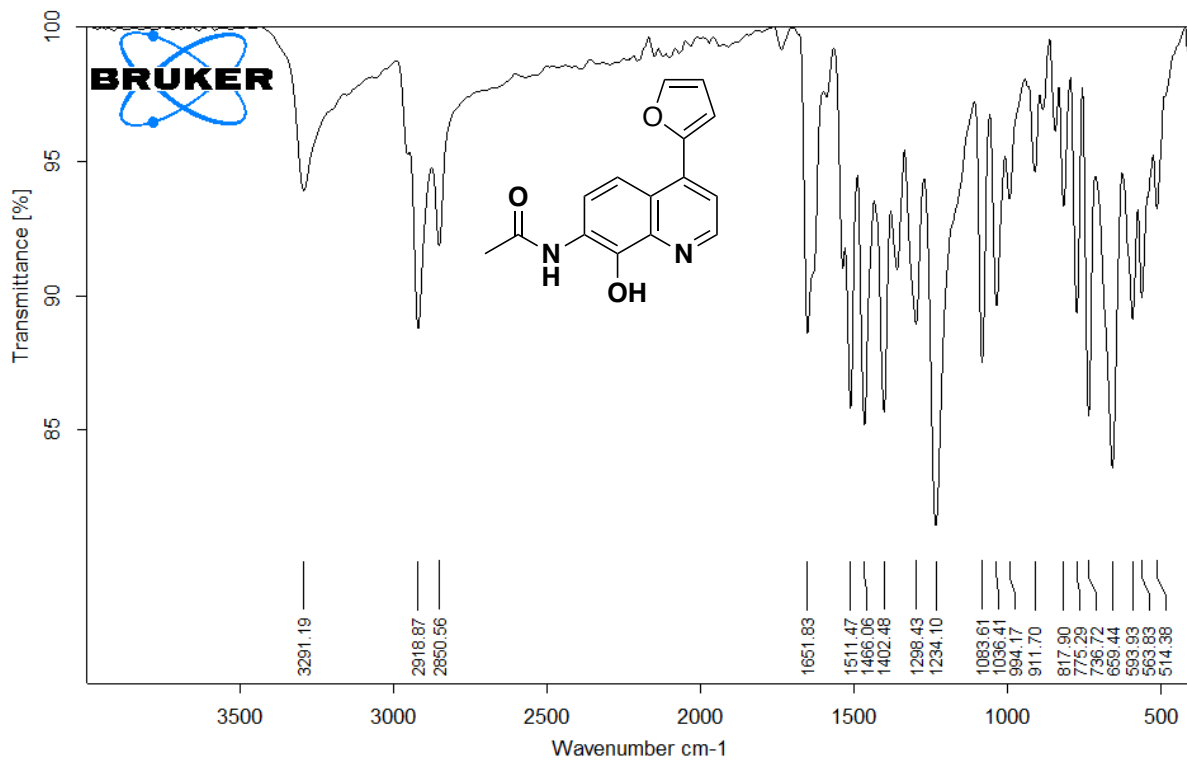

7-Acetamido-4-(3-furanyl)-8-hydroxyquinoline (56) in DMSO-d<sub>6</sub>

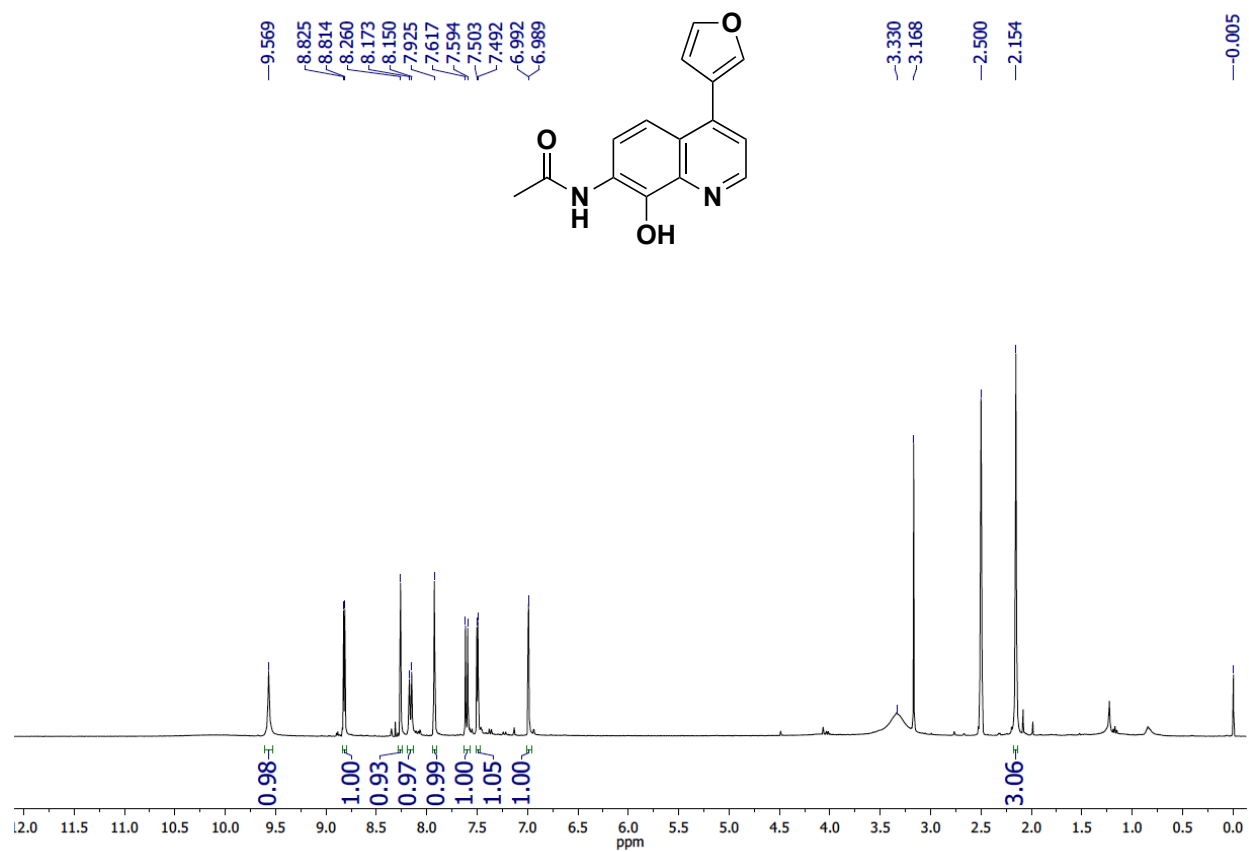



7-Acetamido-4-(3-furanyl)-8-hydroxyquinoline (56) in DMSO-d<sub>6</sub>

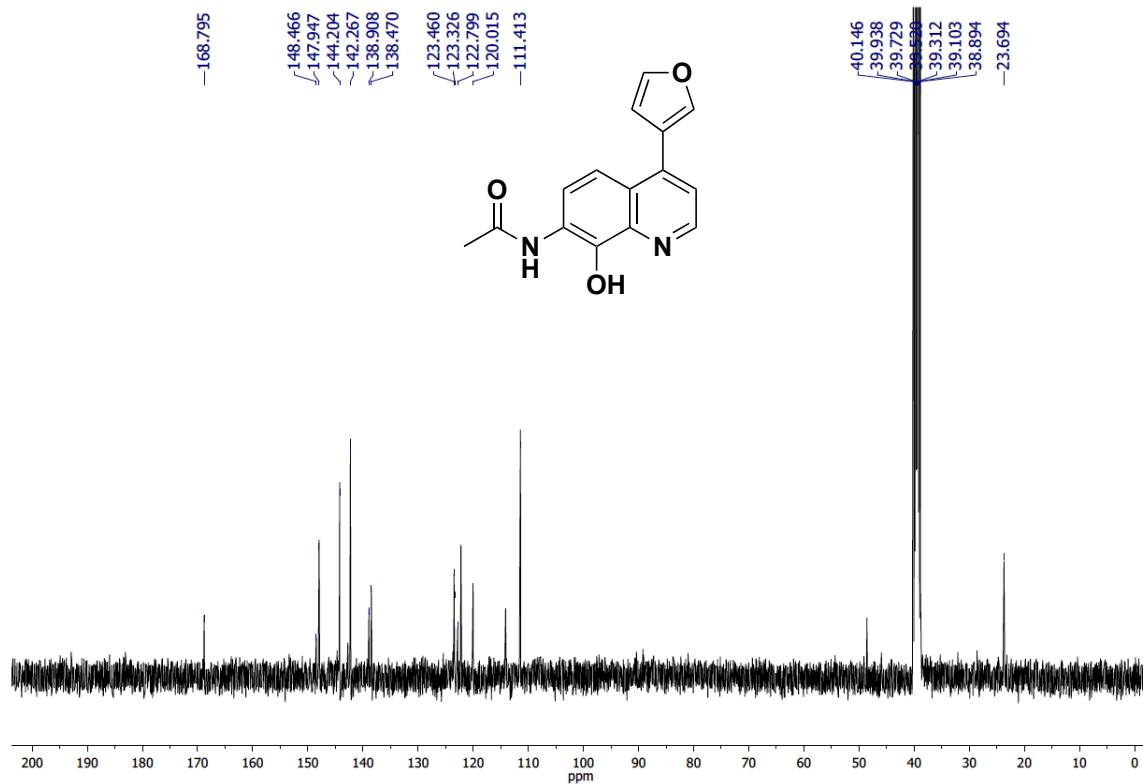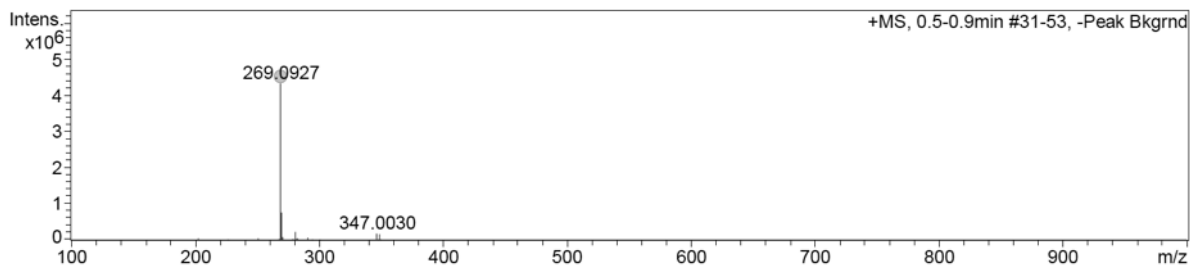

7-Acetamido-4-(3-furanyl)-8-hydroxyquinoline (56)

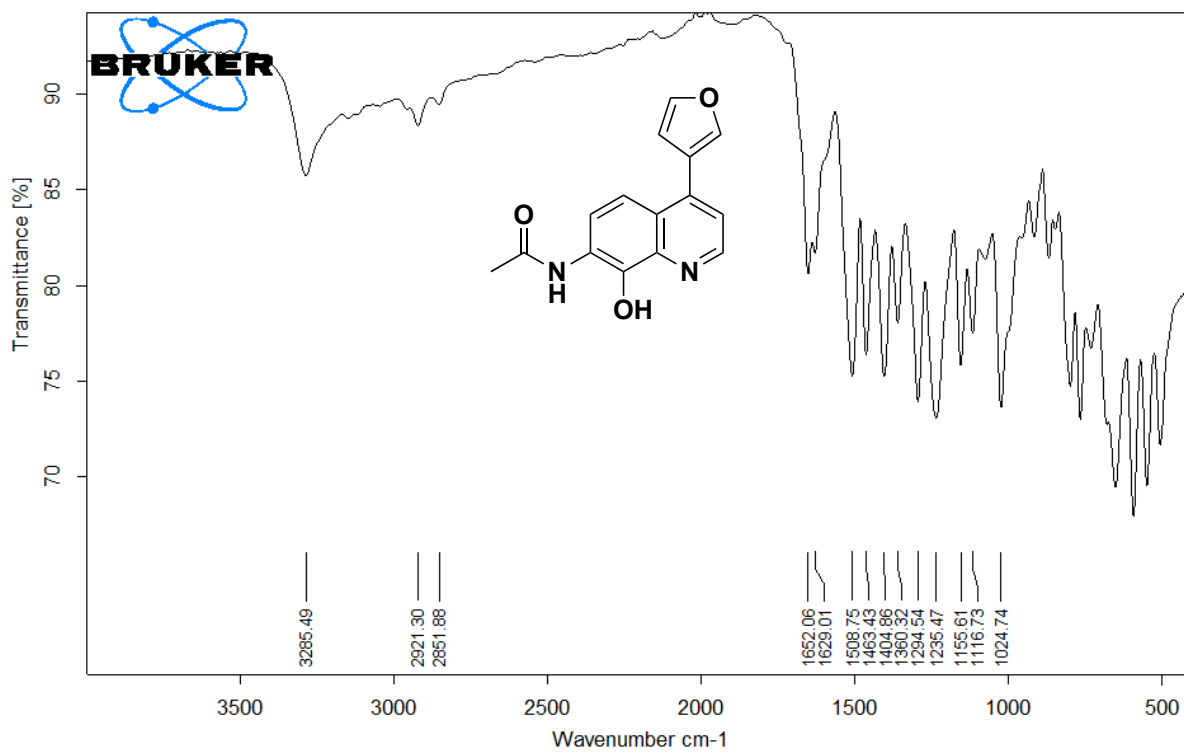

7-Acetamido-4-(thiophen-2-yl)-8-hydroxyquinoline (57) in DMSO-d<sub>6</sub>

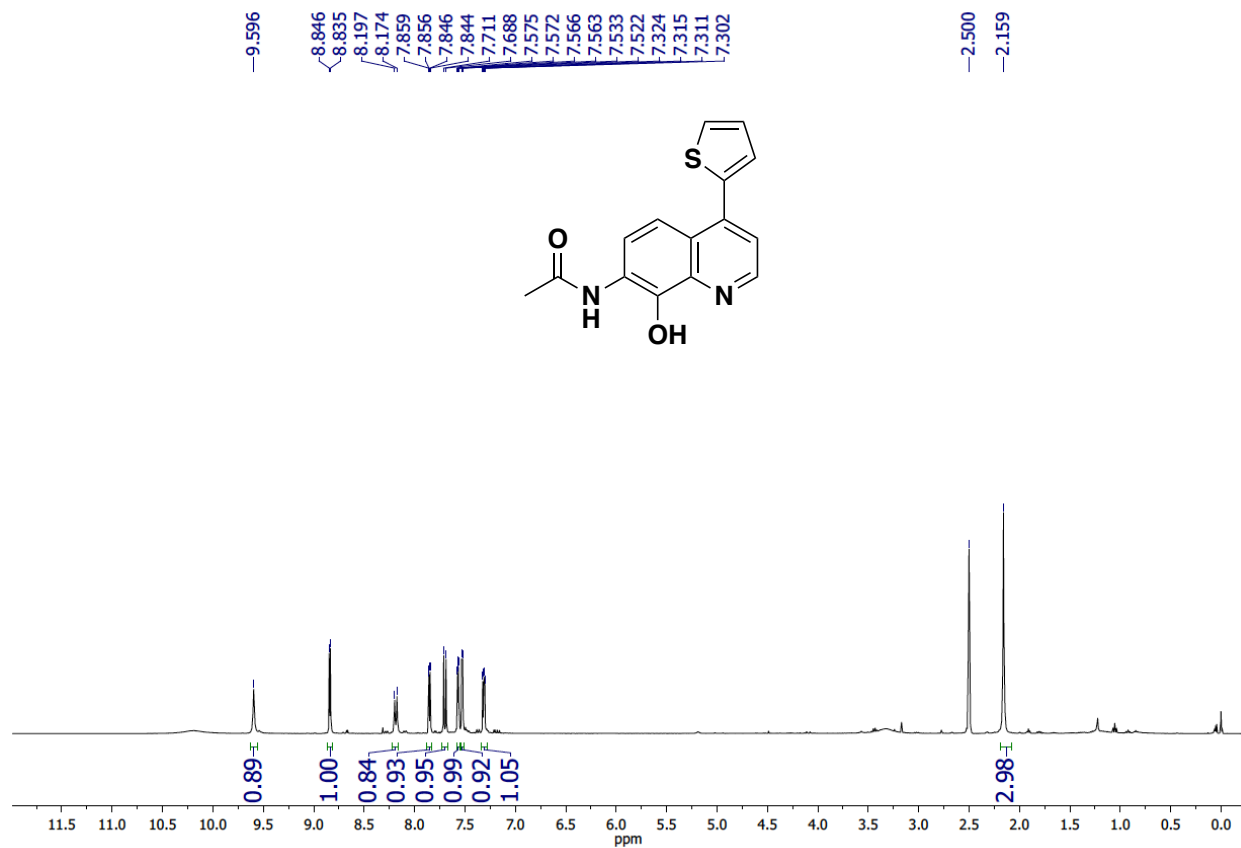

7-Acetamido-4-(thiophen-2-yl)-8-hydroxyquinoline (57) in DMSO-d<sub>6</sub>

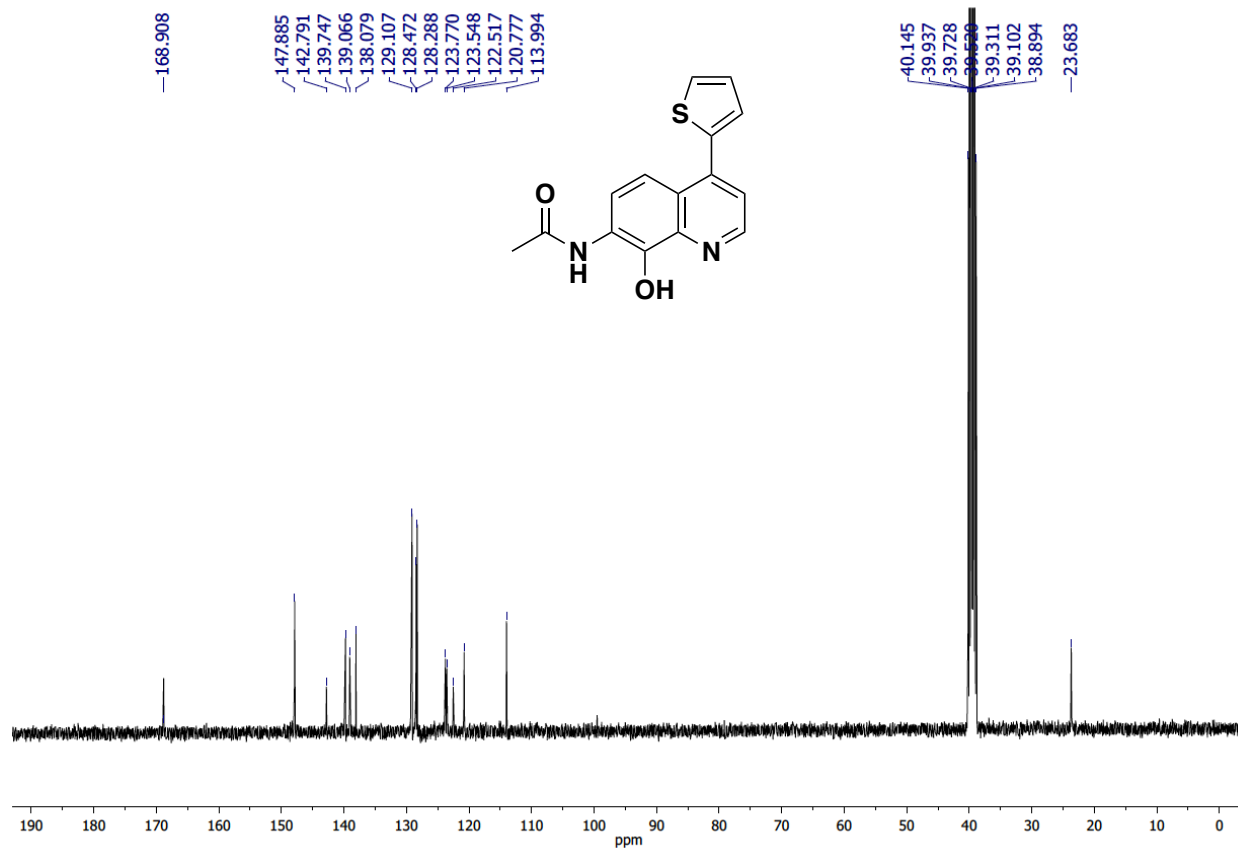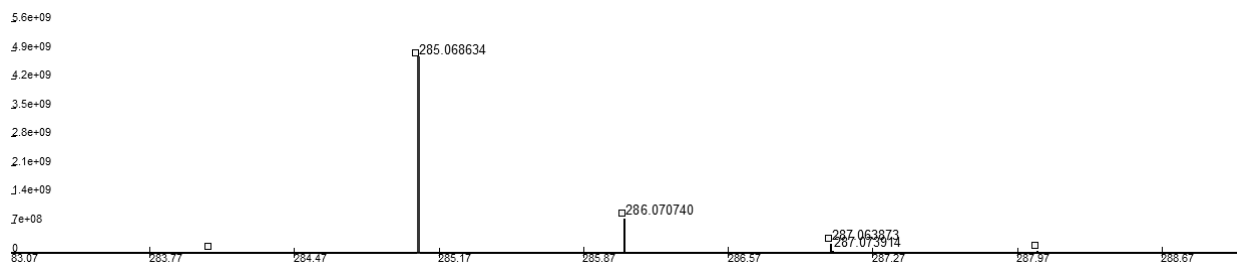

7-Acetamido-4-(thiophen-2-yl)-8-hydroxyquinoline (57)

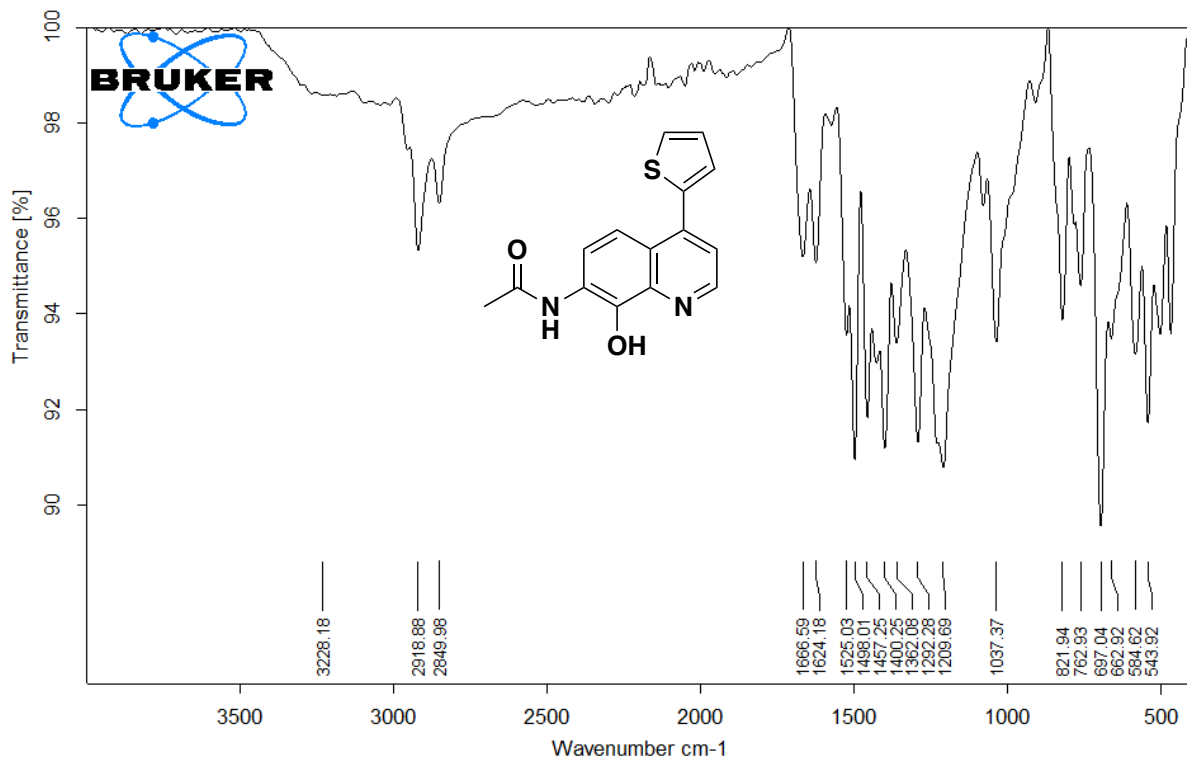

7-Acetamido-4-(thiophen-3-yl)-8-hydroxyquinoline (58) in DMSO-d<sub>6</sub>

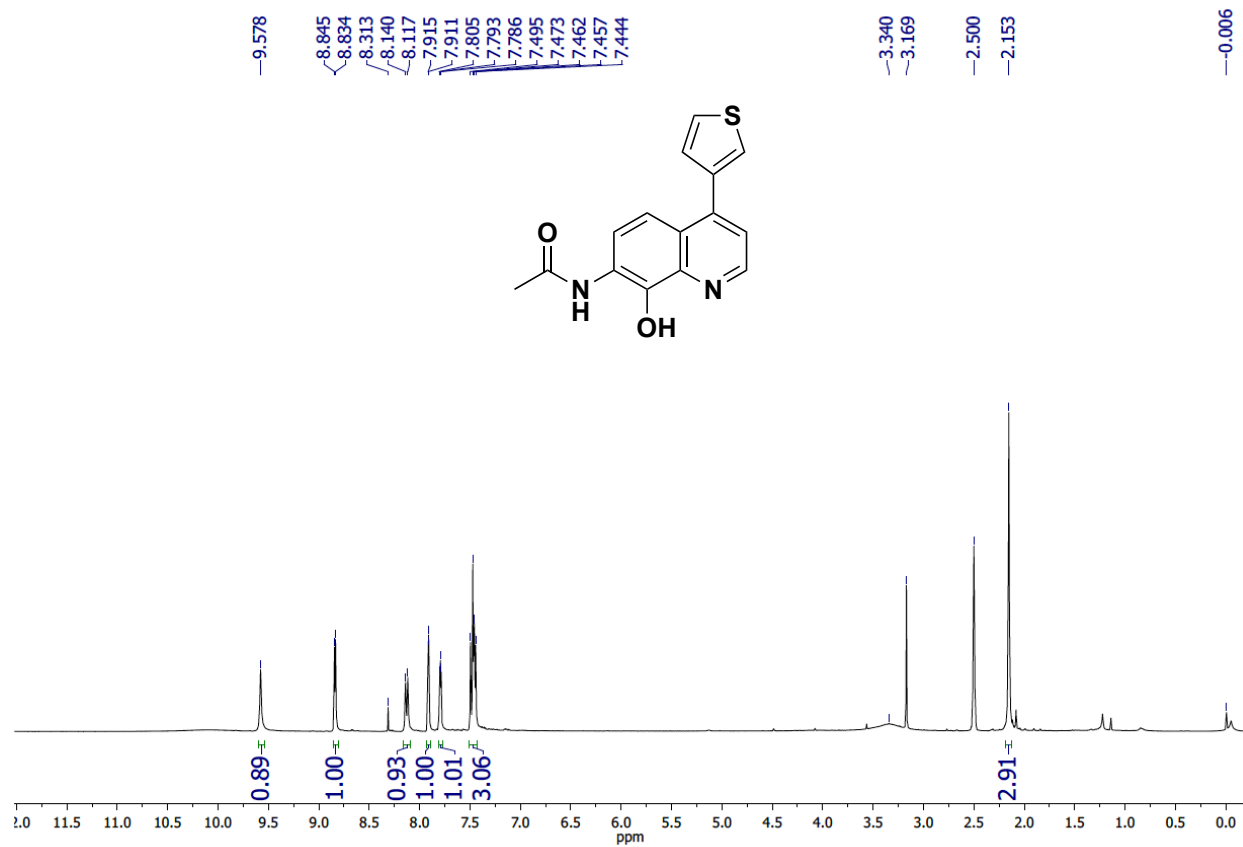

7-Acetamido-4-(thiophen-3-yl)-8-hydroxyquinoline (58) in DMSO-d<sub>6</sub>

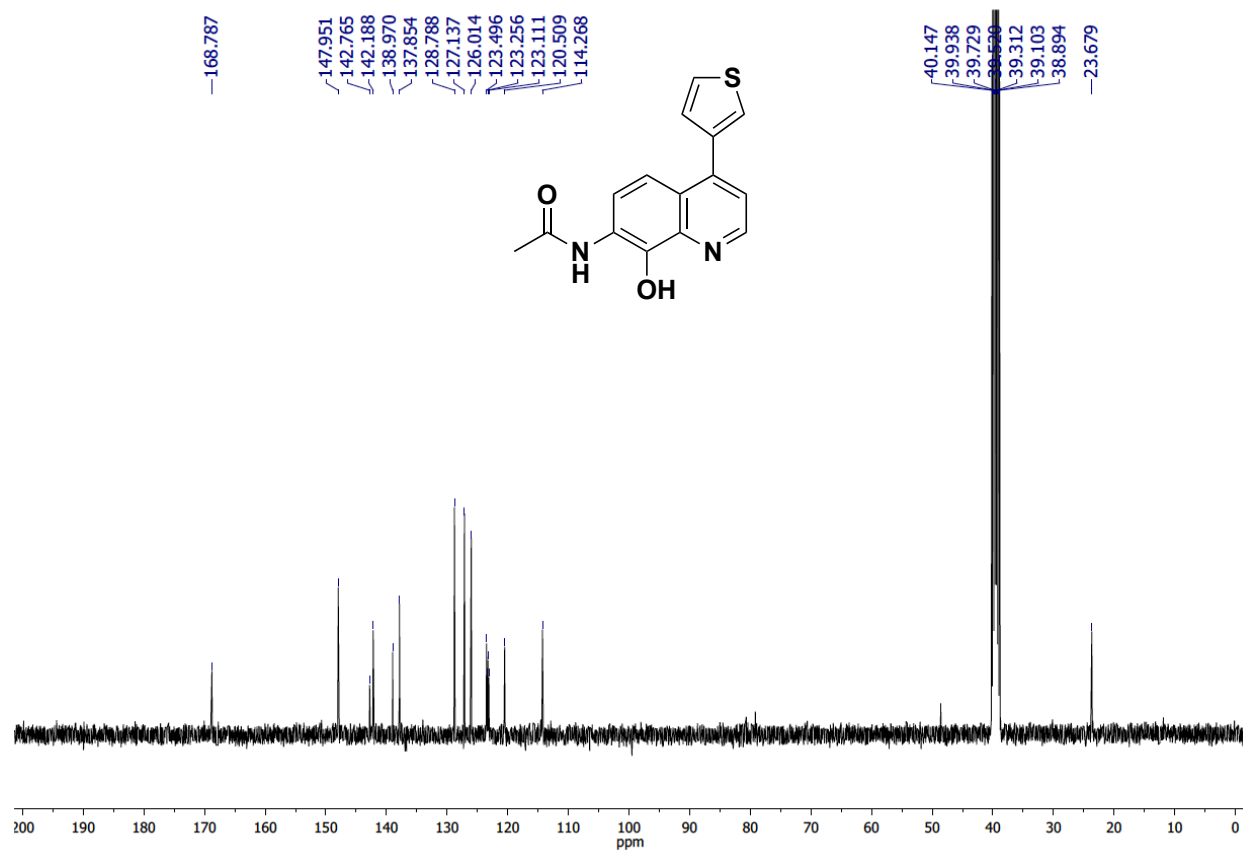

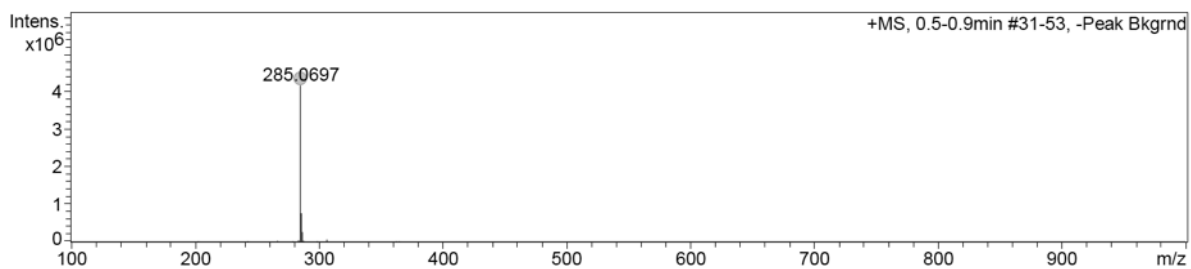

7-Acetamido-4-(thiophen-3-yl)-8-hydroxyquinoline (58)

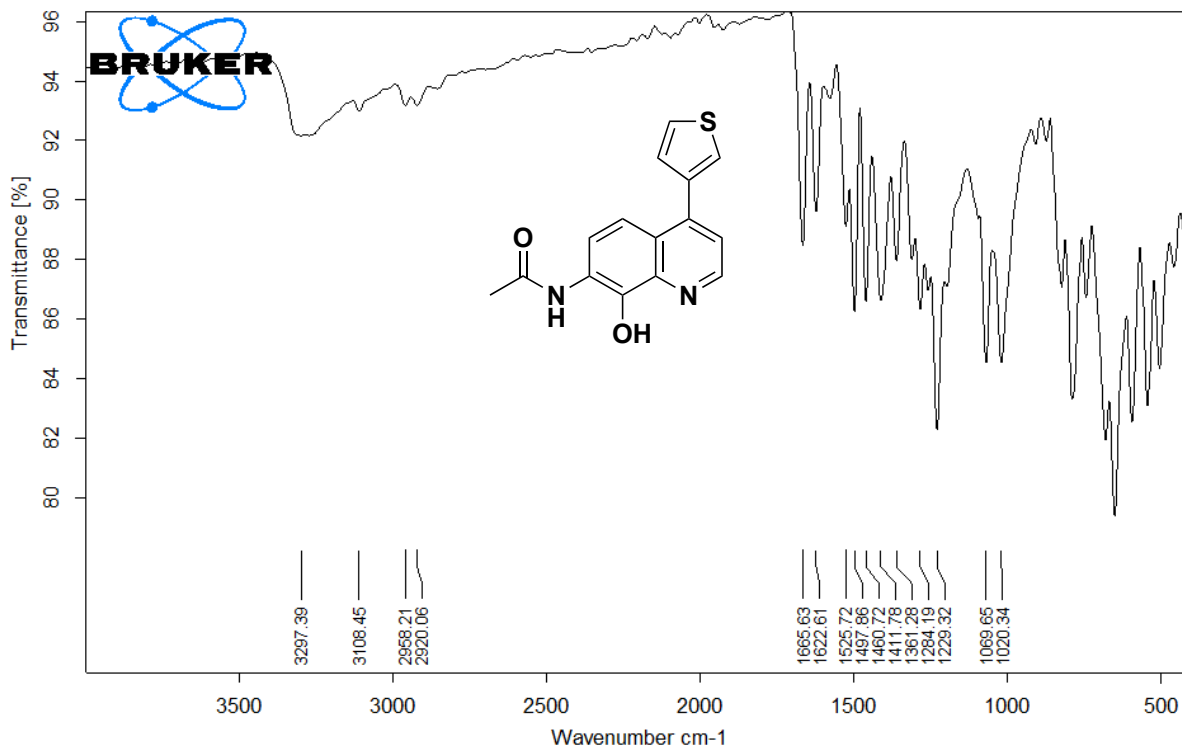



7-Acetamido-4-(5-pyrimidinyl)-8-hydroxyquinoline (59) in DMSO-d<sub>6</sub>

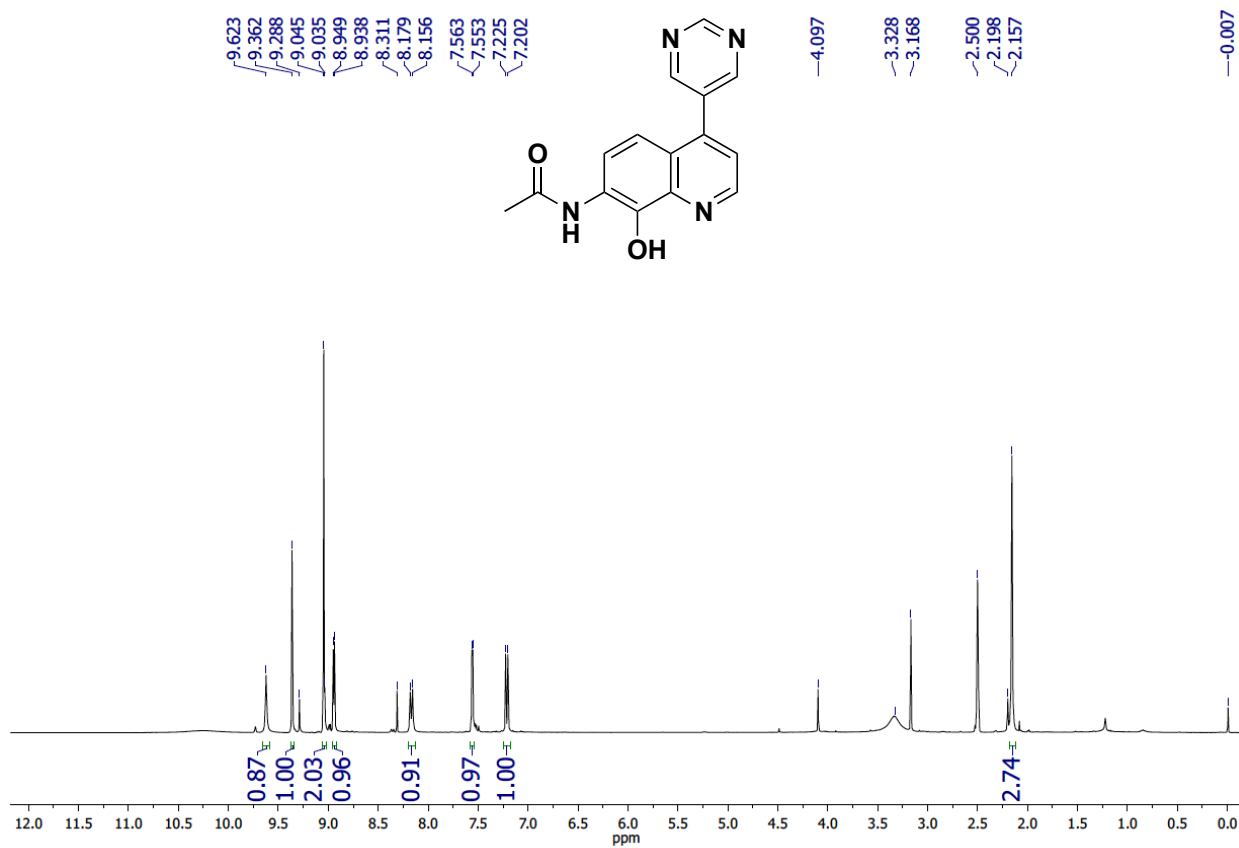

7-Acetamido-4-(5-pyrimidinyl)-8-hydroxyquinoline (59) in DMSO-d<sub>6</sub>

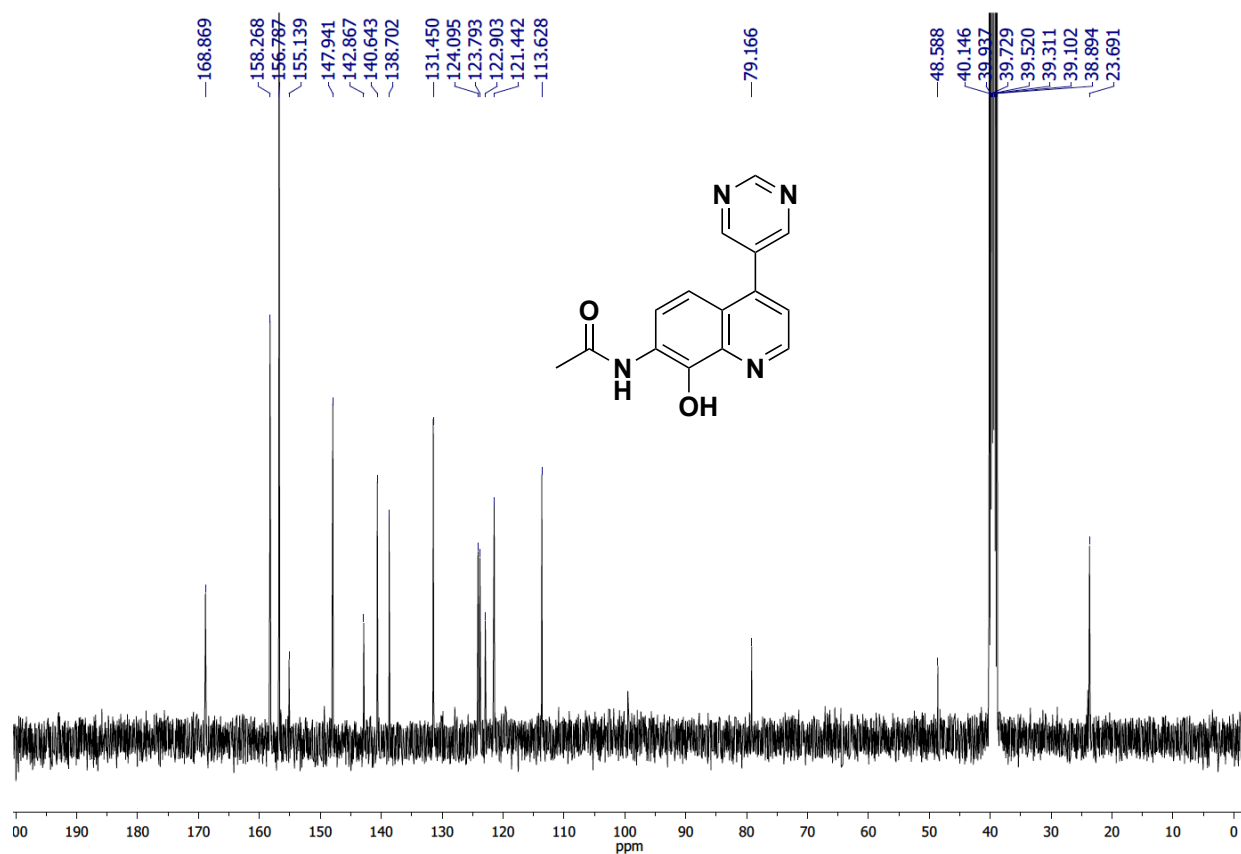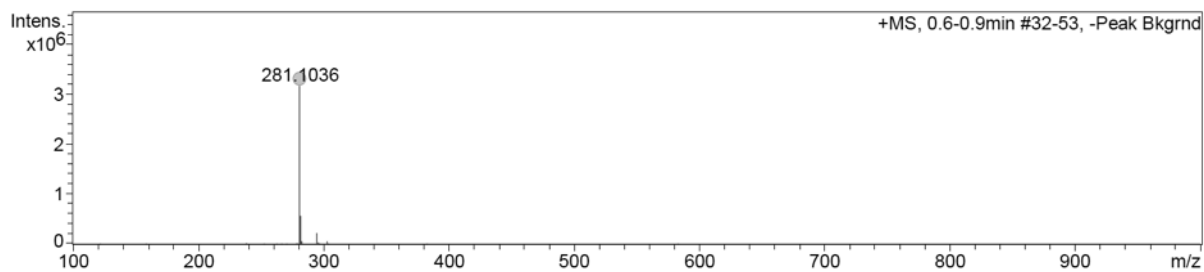

7-Acetamido-4-(5-pyrimidinyl)-8-hydroxyquinoline (59)

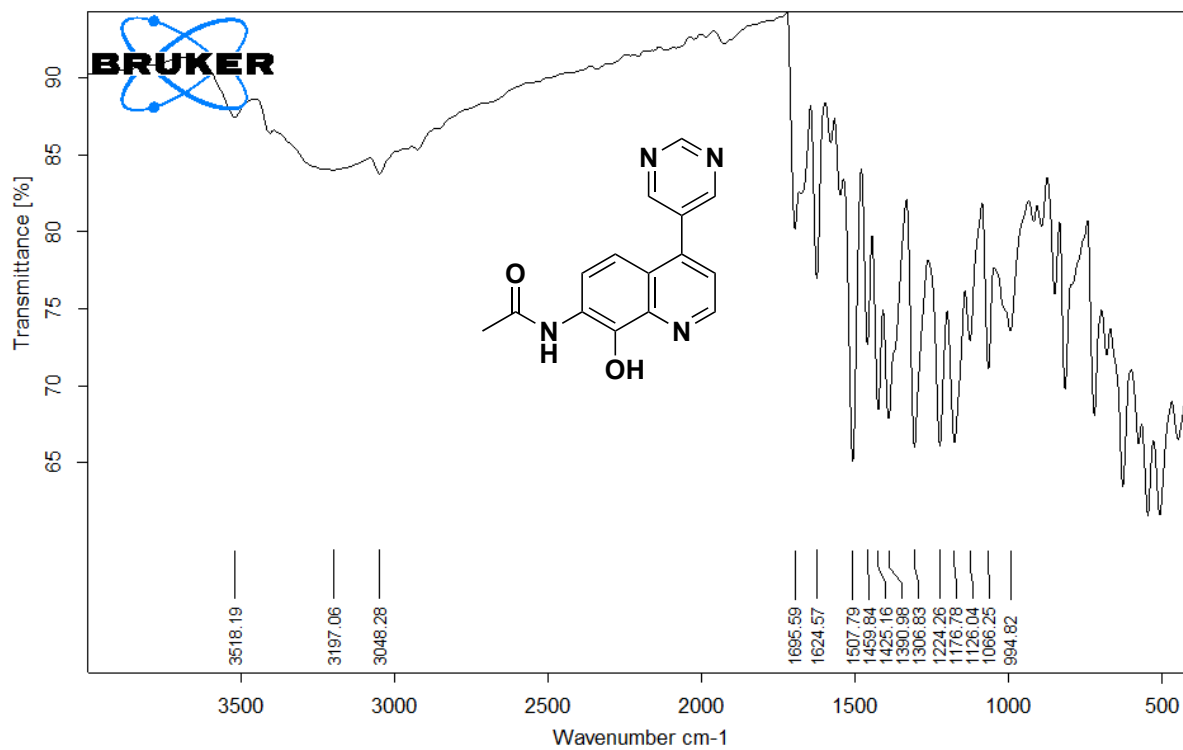

4-(2-benzofuranyl)-8-hydroxy-7-(2-(morpholin-4-yl)acetamido)quinoline (60) in DMSO-d<sub>6</sub>

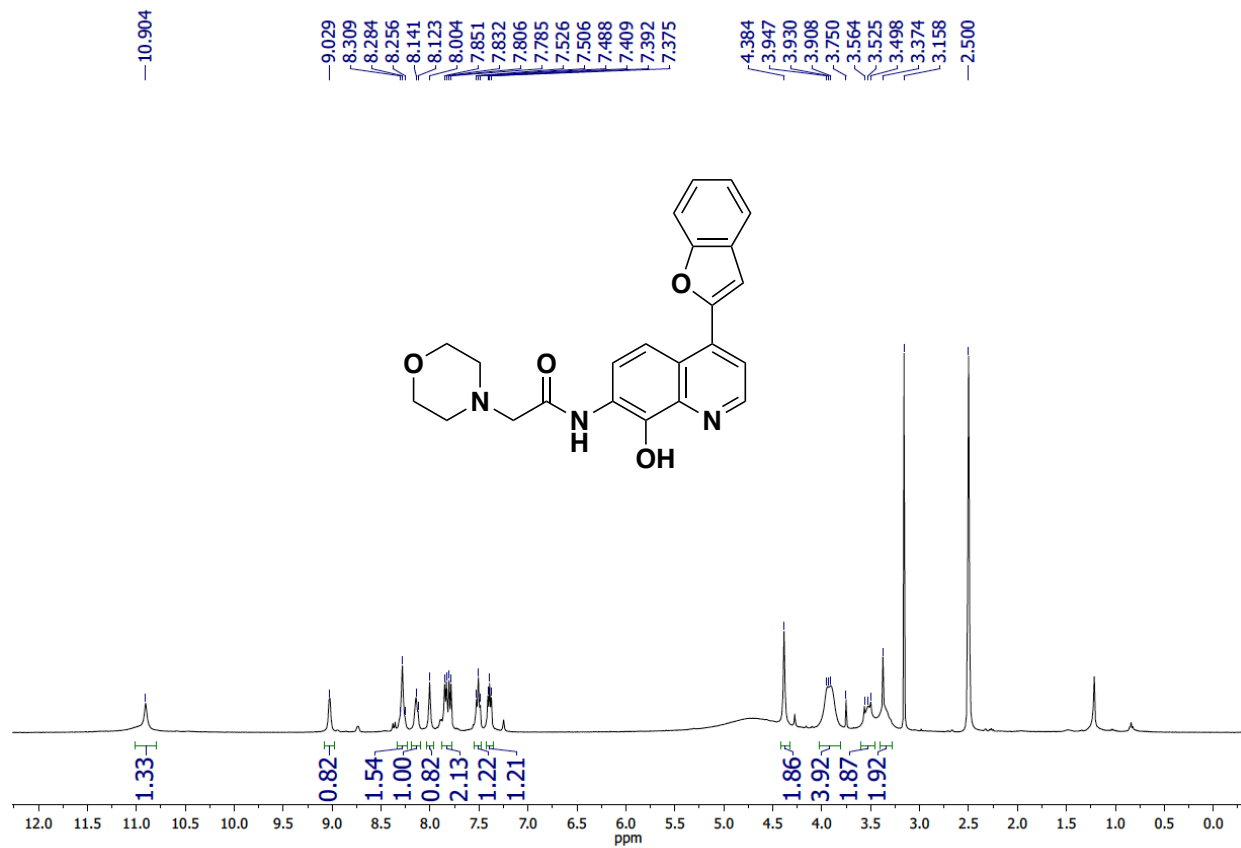

4-(2-benzofuranyl)-8-hydroxy-7-(2-(morpholin-4-yl)acetamido)quinoline (60) in DMSO-d<sub>6</sub>

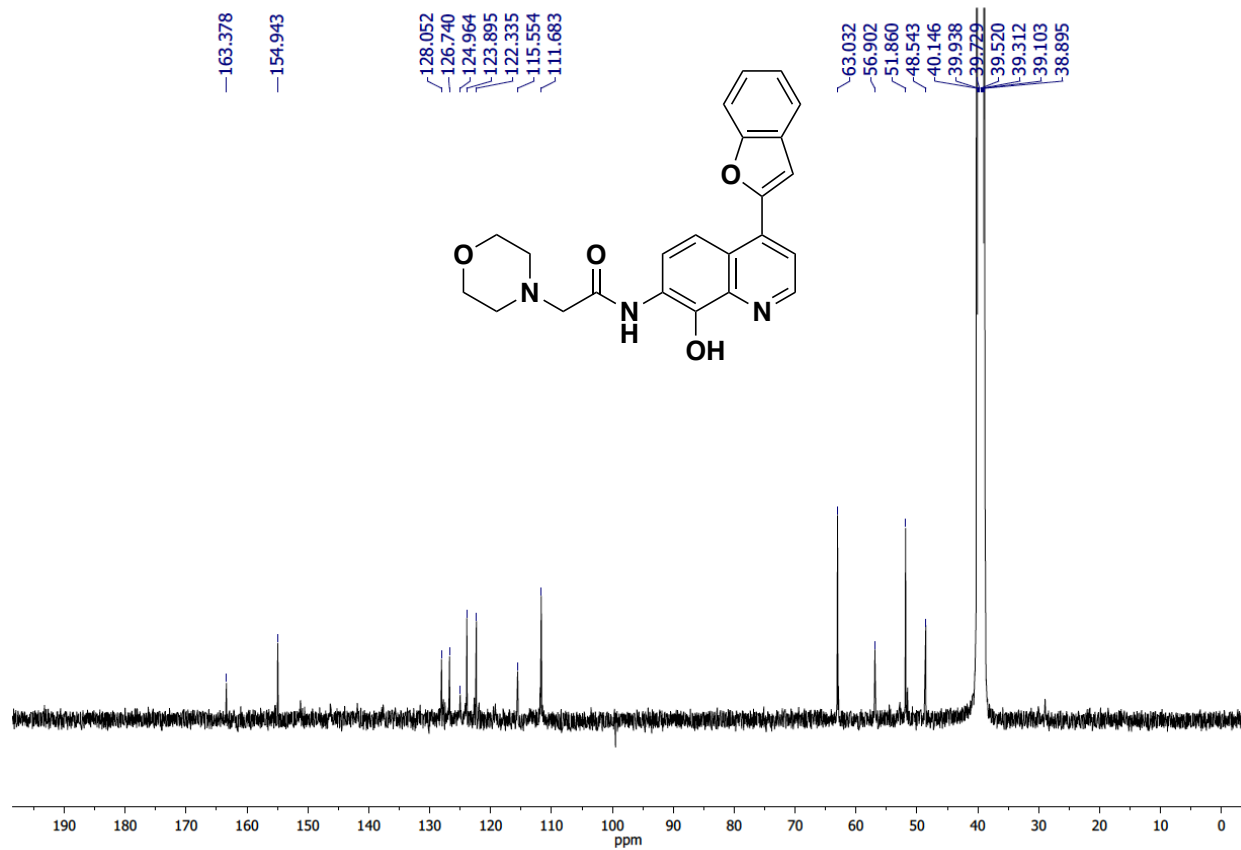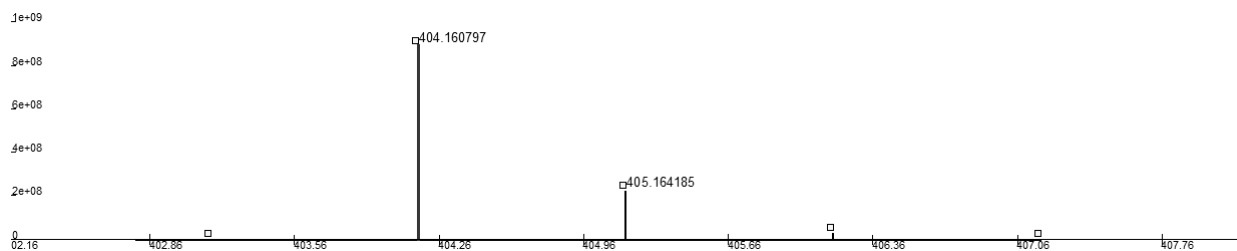

4-(2-benzofuranyl)-8-hydroxy-7-(2-(morpholin-4-yl)acetamido)quinoline (60)

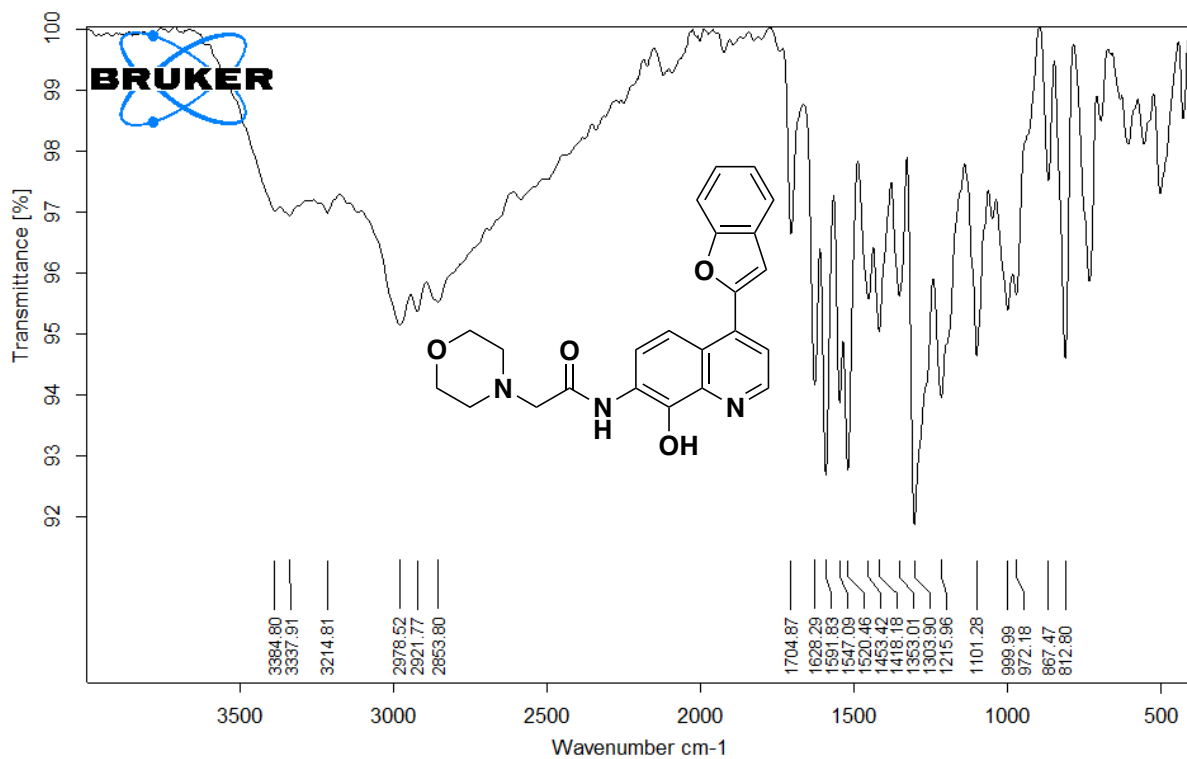

4-(2-benzofuranyl)-8-hydroxy-7-(3-(morpholin-4-yl)propanamido)quinoline (61) in DMSO-d<sub>6</sub>

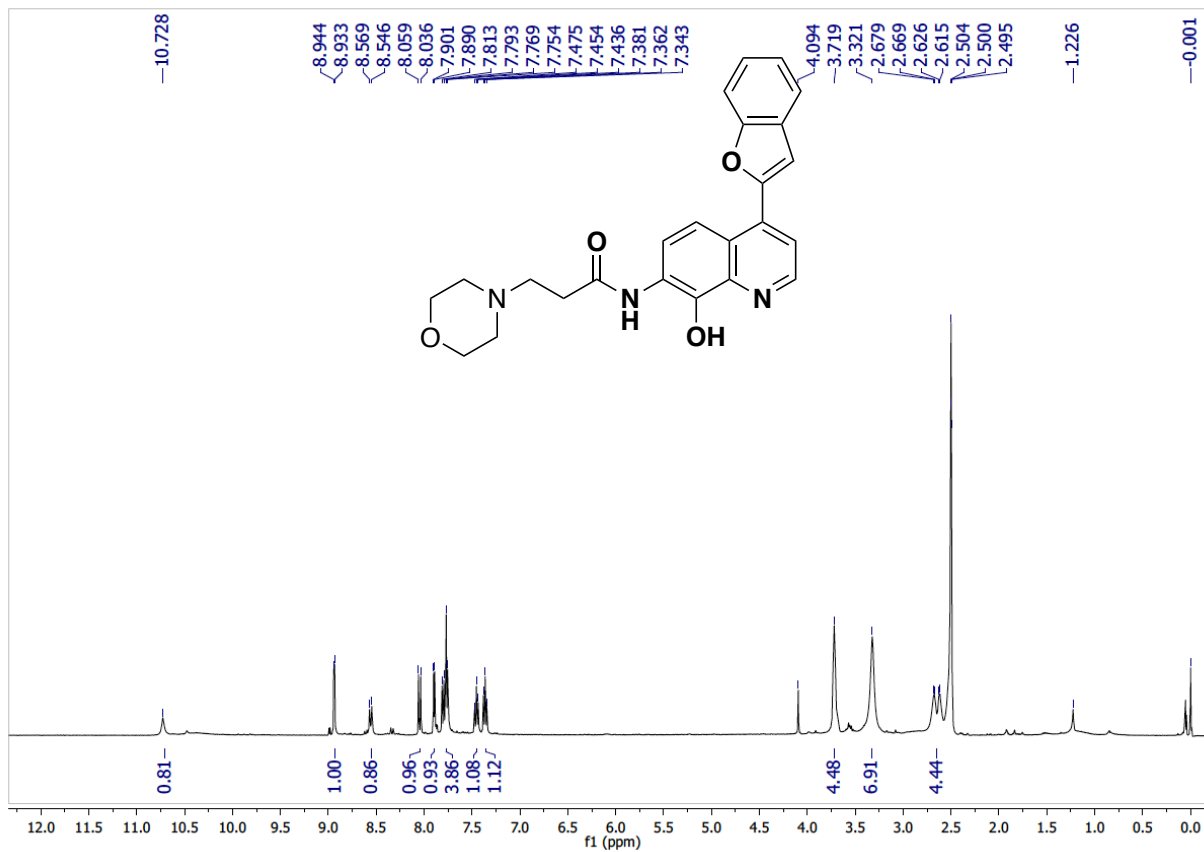

4-(2-benzofuranyl)-8-hydroxy-7-(3-(morpholin-4-yl)propanamido)quinoline (61) in DMSO-d<sub>6</sub>

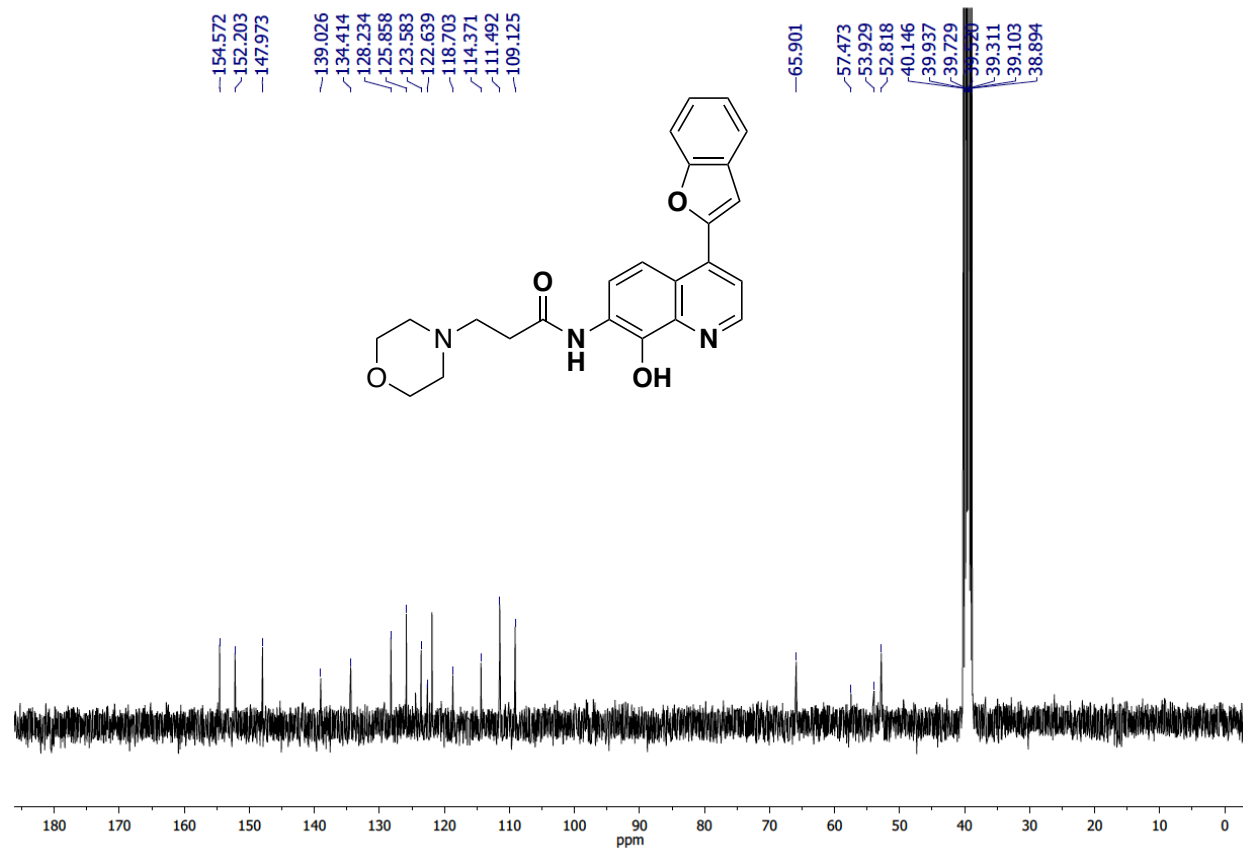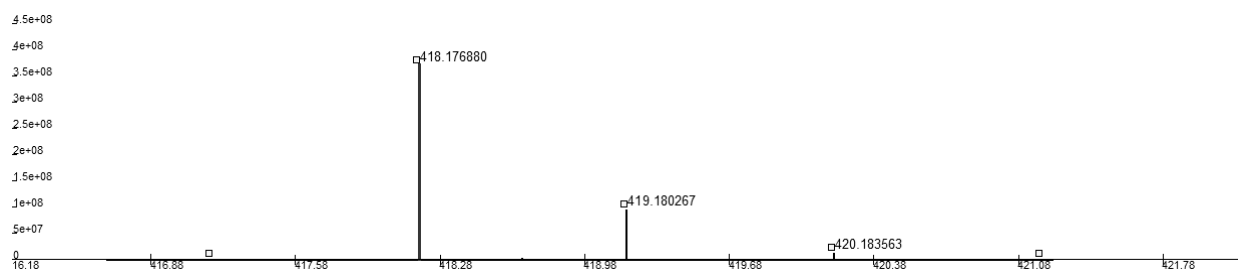



4-(2-benzofuranyl)-8-hydroxy-7-(3-(morpholin-4-yl)propanamido)quinoline (61)

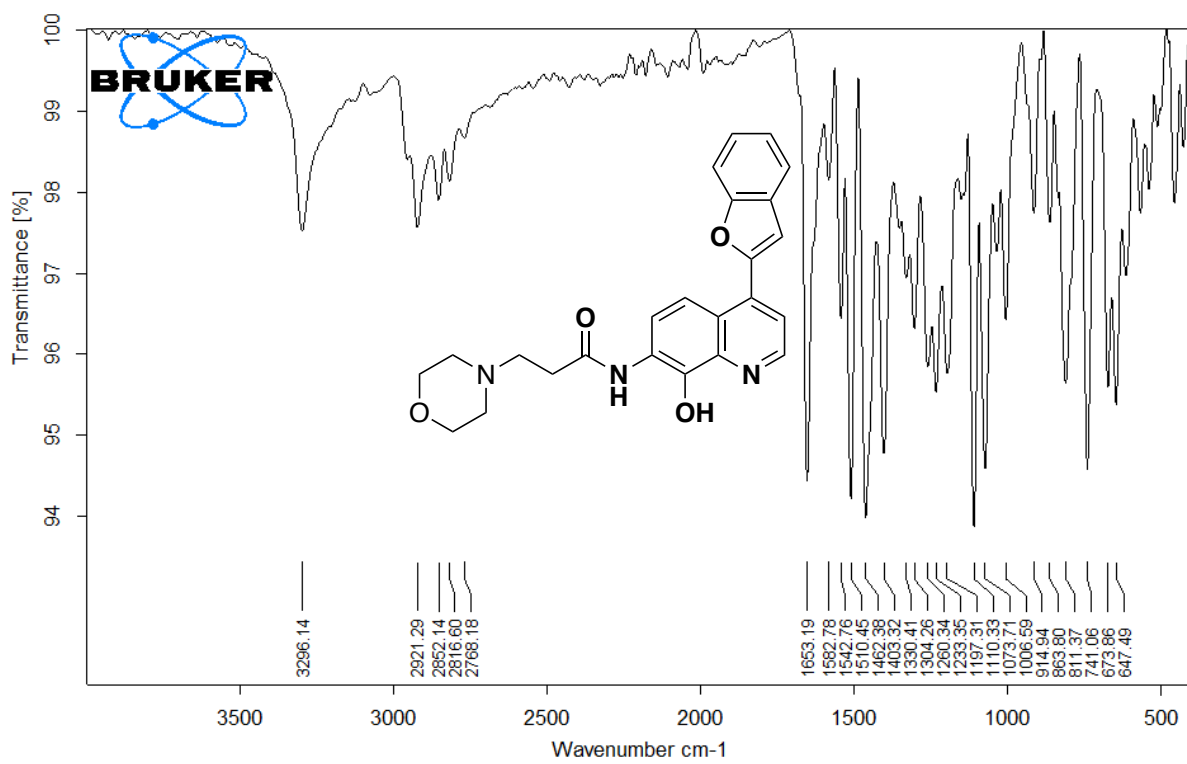

### 2-Methoxy-3-nitrobenzoic acid (S1)

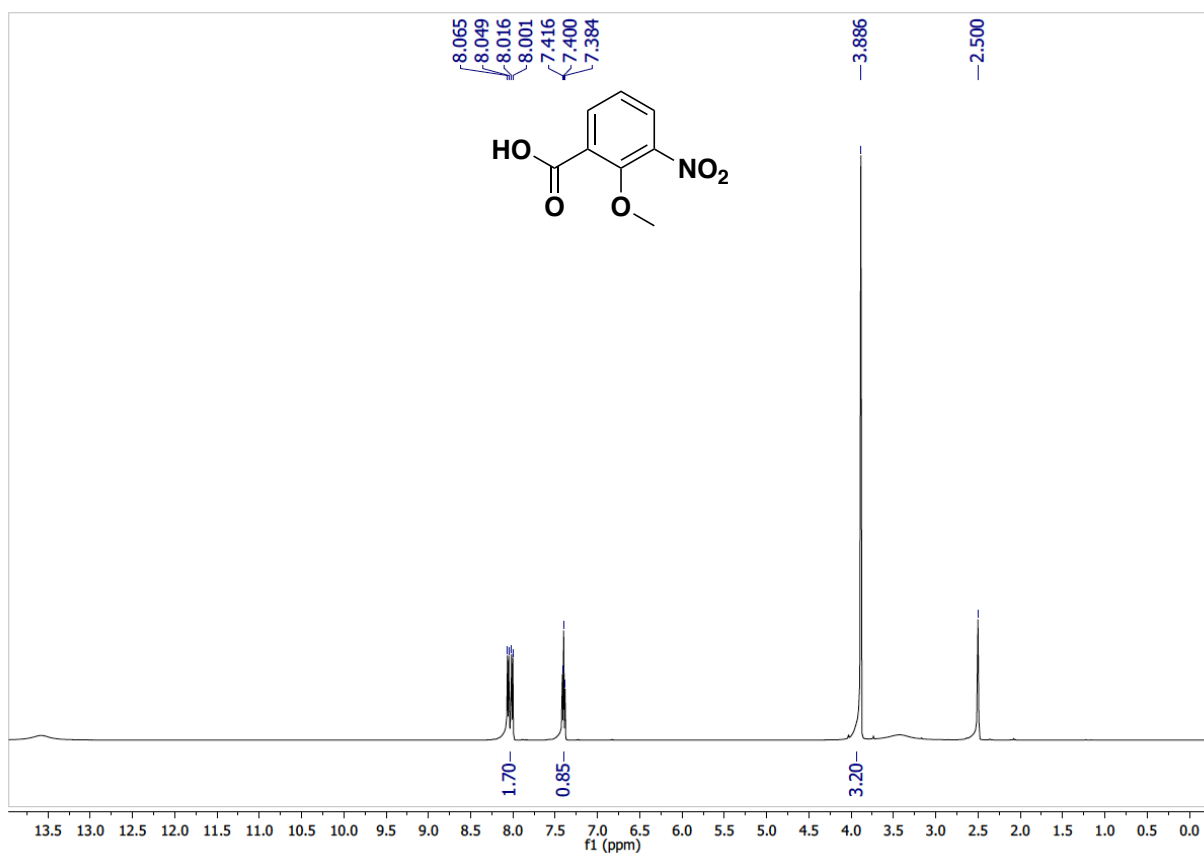

2-Methyl-2-propanyl [2-(methoxy)-3-nitrophenyl] carbamate (S3) in CDCl<sub>3</sub>

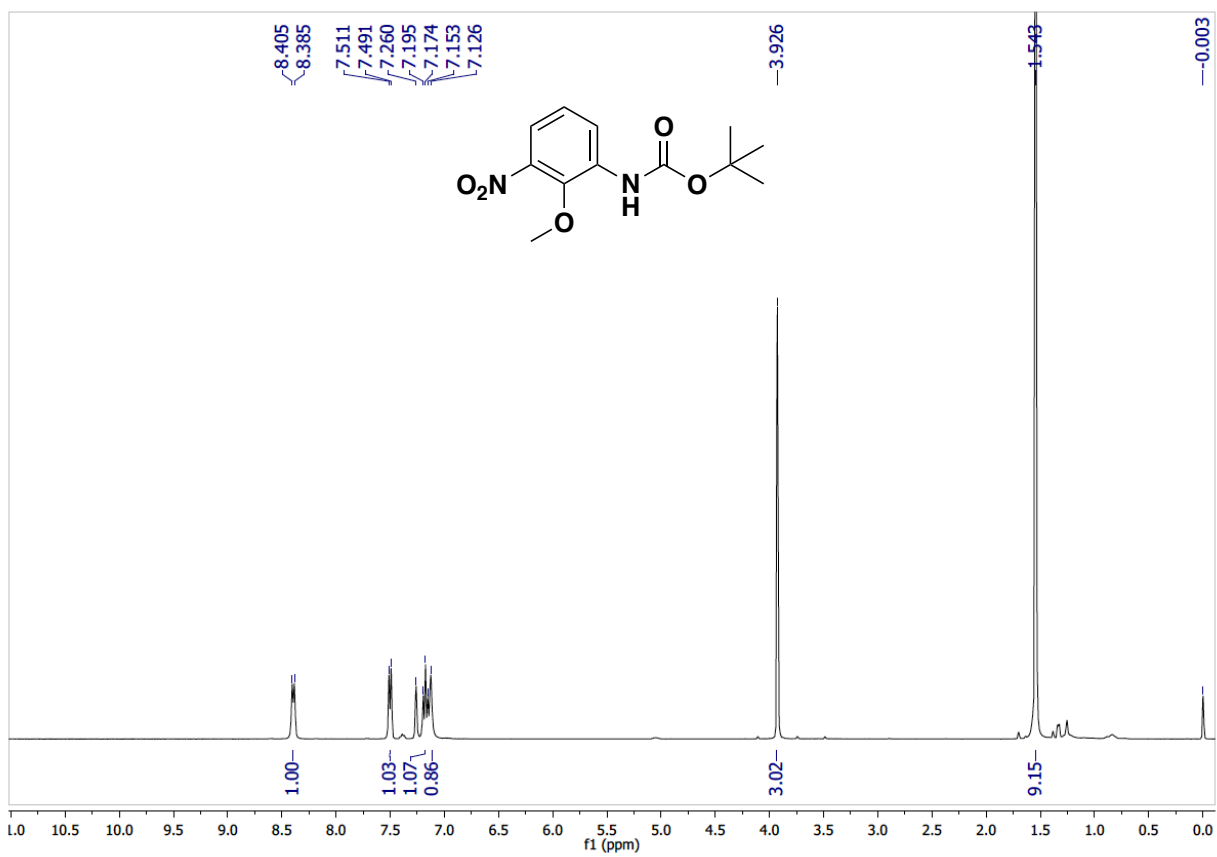

2-Methyl-2-propanyl [2-(methoxy)-3-nitrophenyl] carbamate (S3) in CDCl<sub>3</sub>

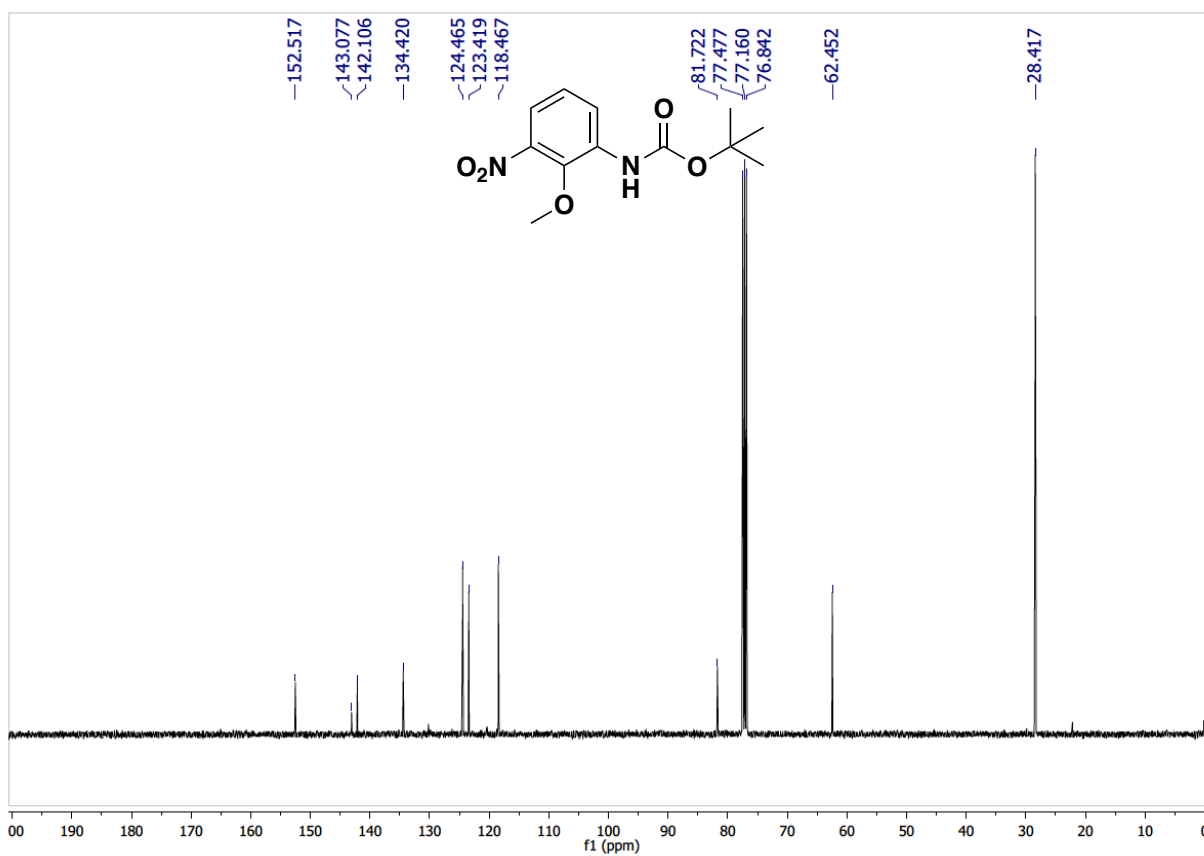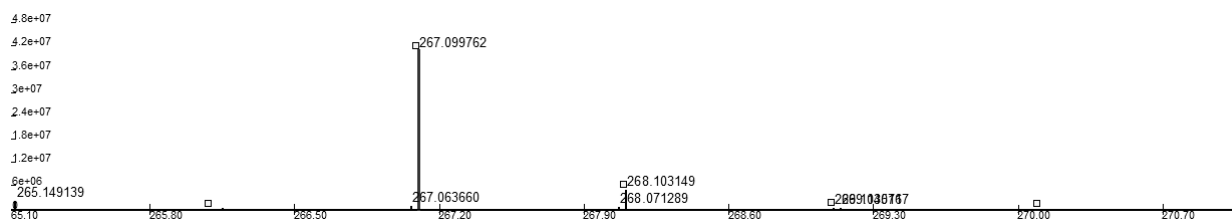

2-Methyl-2-propanyl [2-(methoxy)-3-nitrophenyl] carbamate (S3)

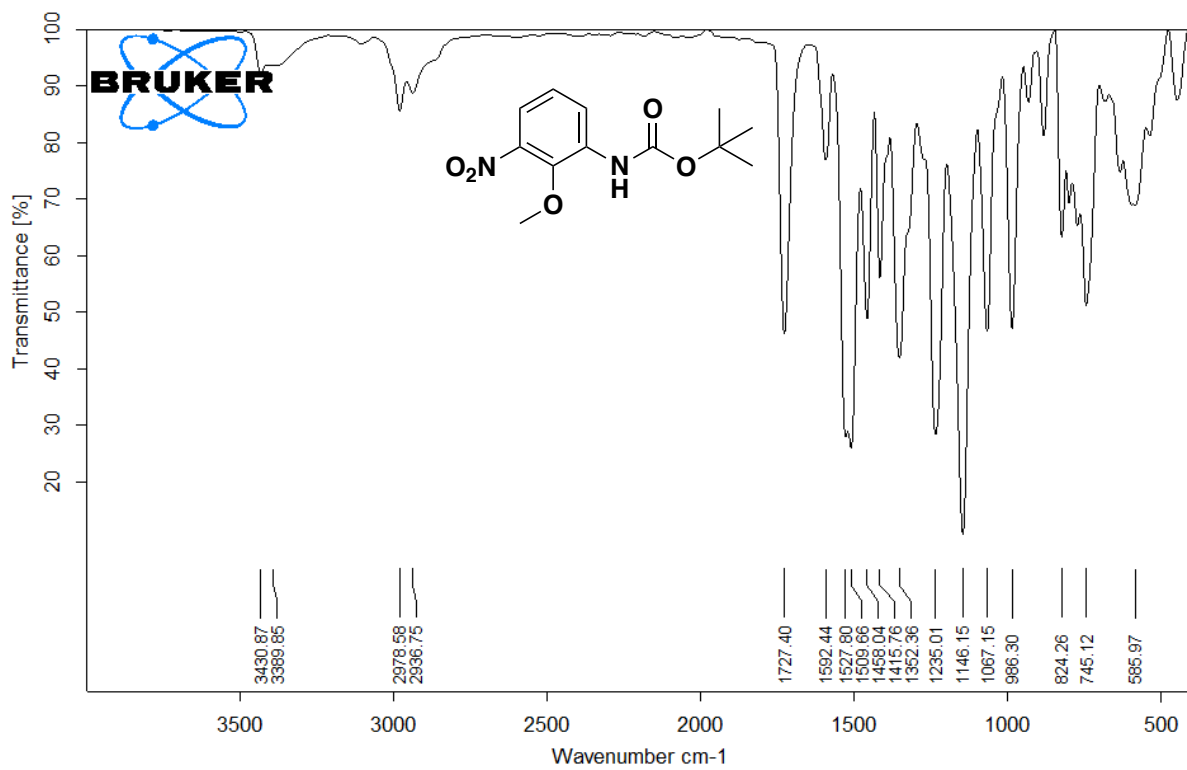

2-Methoxy-3-nitroaniline (S4) in CDCl<sub>3</sub>

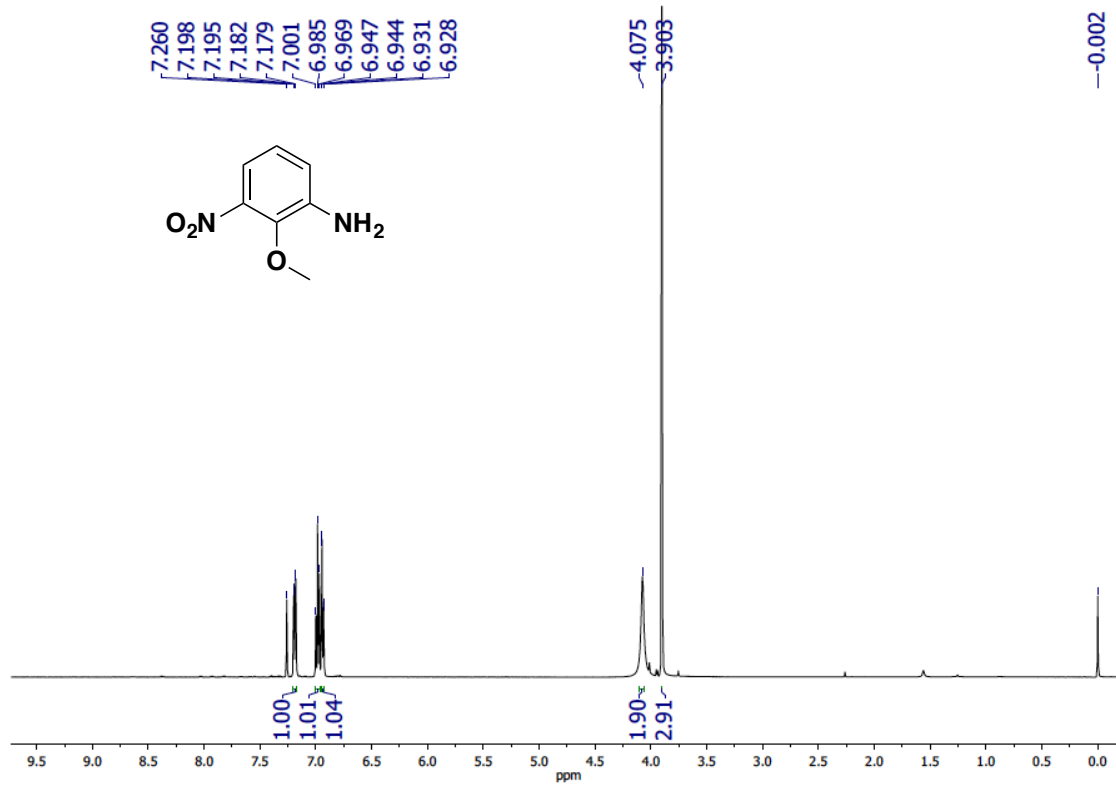

5-[[2-Methoxy-3-nitrophenyl] amino] methyldene)-2,2-dimethyl-4,6-dioxo-1,3-dioxane

(S5) in CDCl<sub>3</sub>.

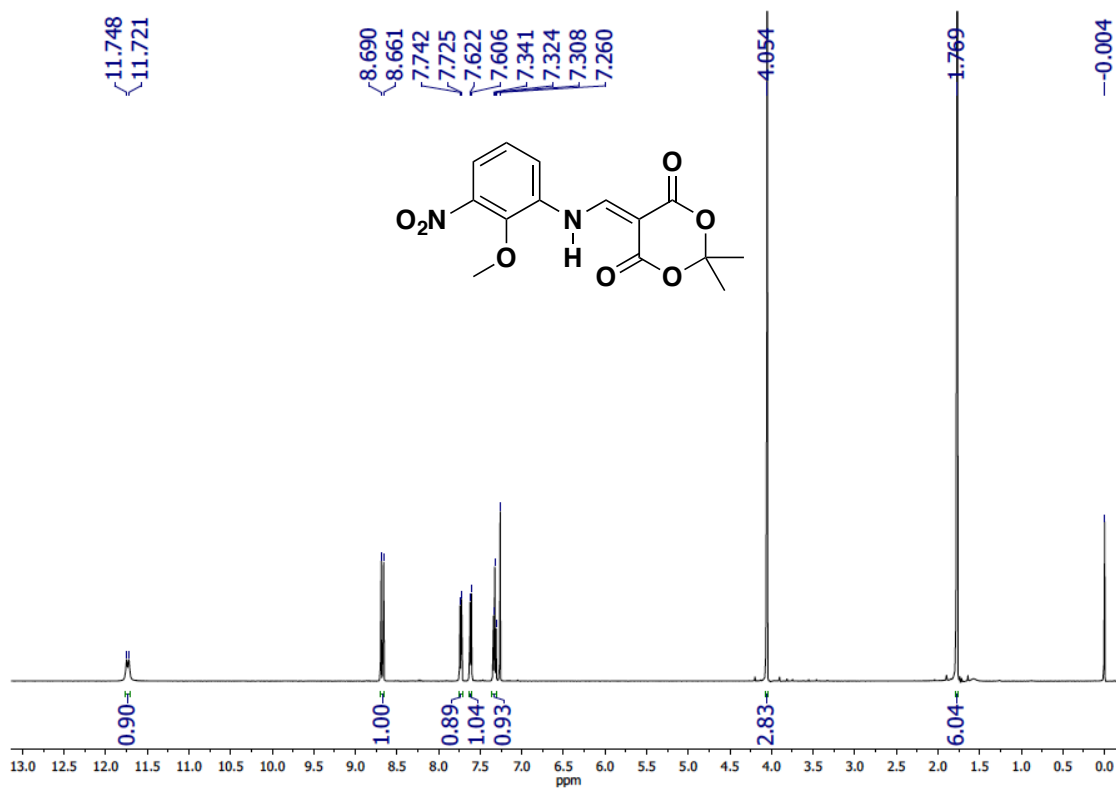

55-[(2-Methoxy-3-nitrophenyl) amino] methylene}-2,2-dimethyl-4,6-dioxo-1,3-dioxane

(S5) in CDCl<sub>3</sub>

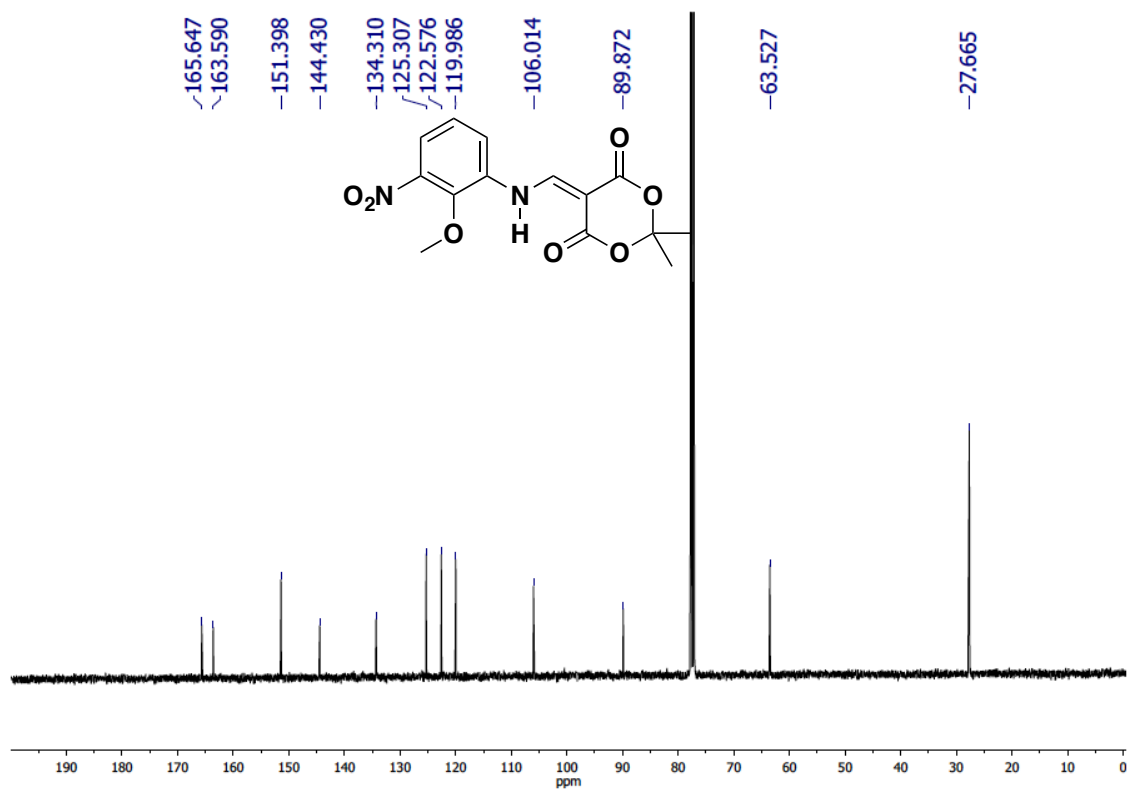



5-[(2-Methoxy-3-nitrophenyl) amino] methyldene}-2,2-dimethyl-4,6-dioxo-1,3-dioxane

(S5)

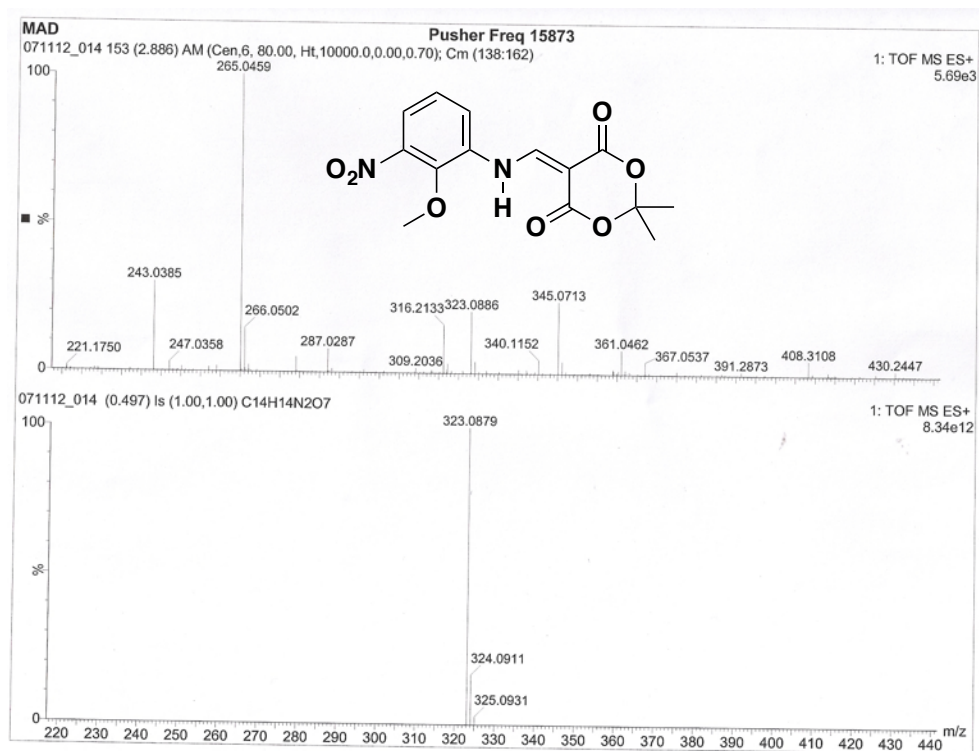

5-[[2-Methoxy-3-nitrophenyl] amino] methyldene)-2,2-dimethyl-4,6-dioxo-1,3-dioxane

(S5)

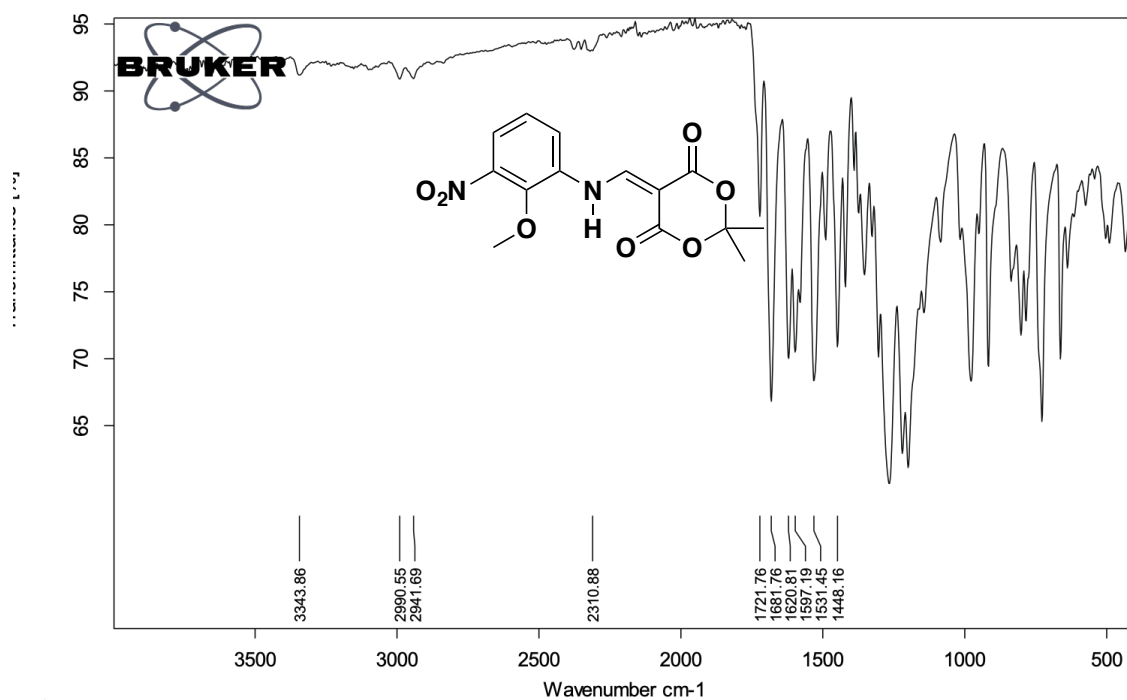

8-Methoxy-7-nitroquinolin-4(1H)-one (S6) in DMSO-d<sub>6</sub>

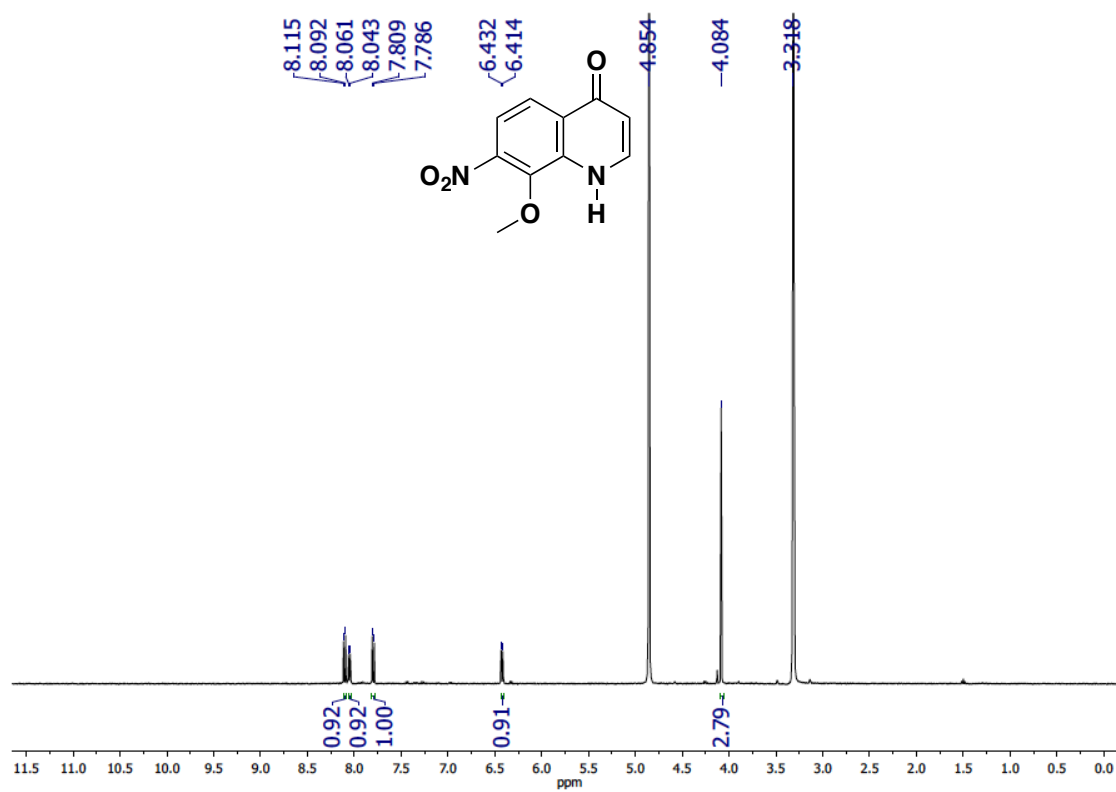

8-Methoxy-7-nitroquinolin-4(1H)-one (S6) in DMSO-d<sub>6</sub>

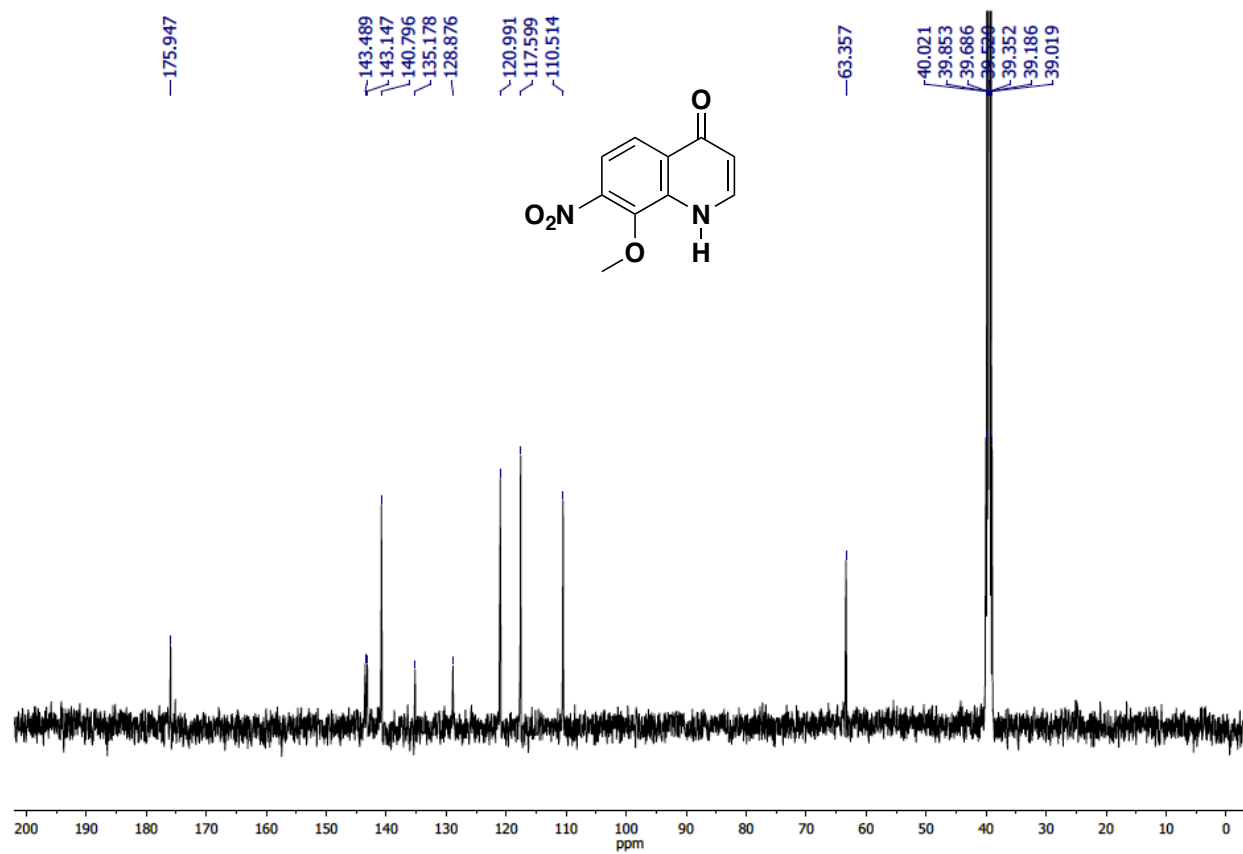

### 8-Methoxy-7-nitroquinolin-4(1H)-one (S6)

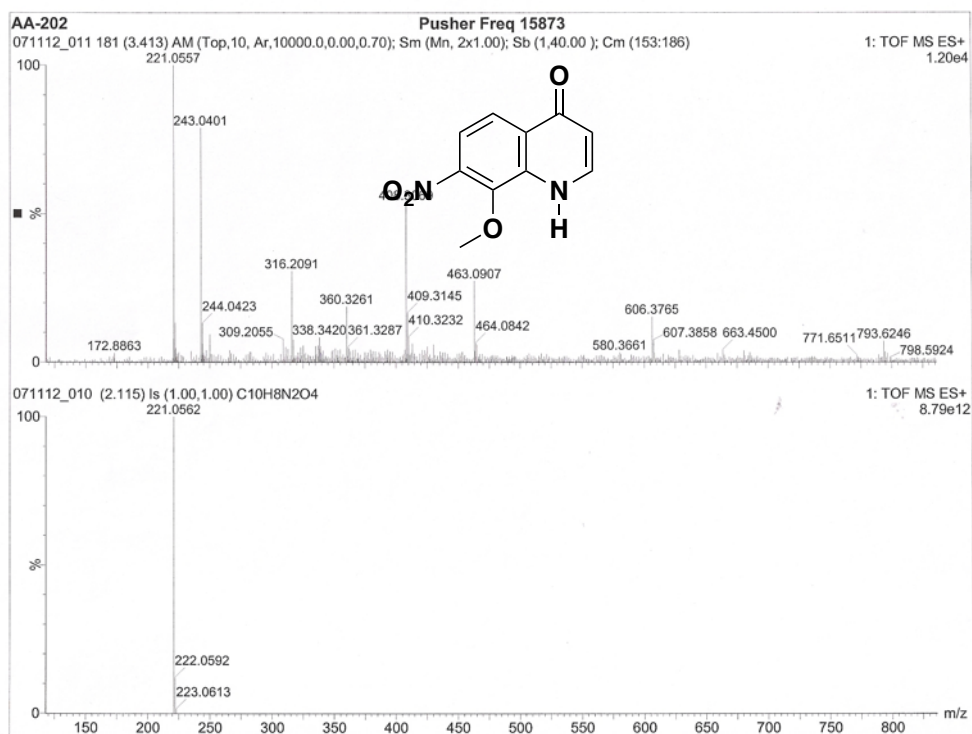

### 8-Methoxy-7-nitroquinolin-4(1H)-one (S6) DMSO

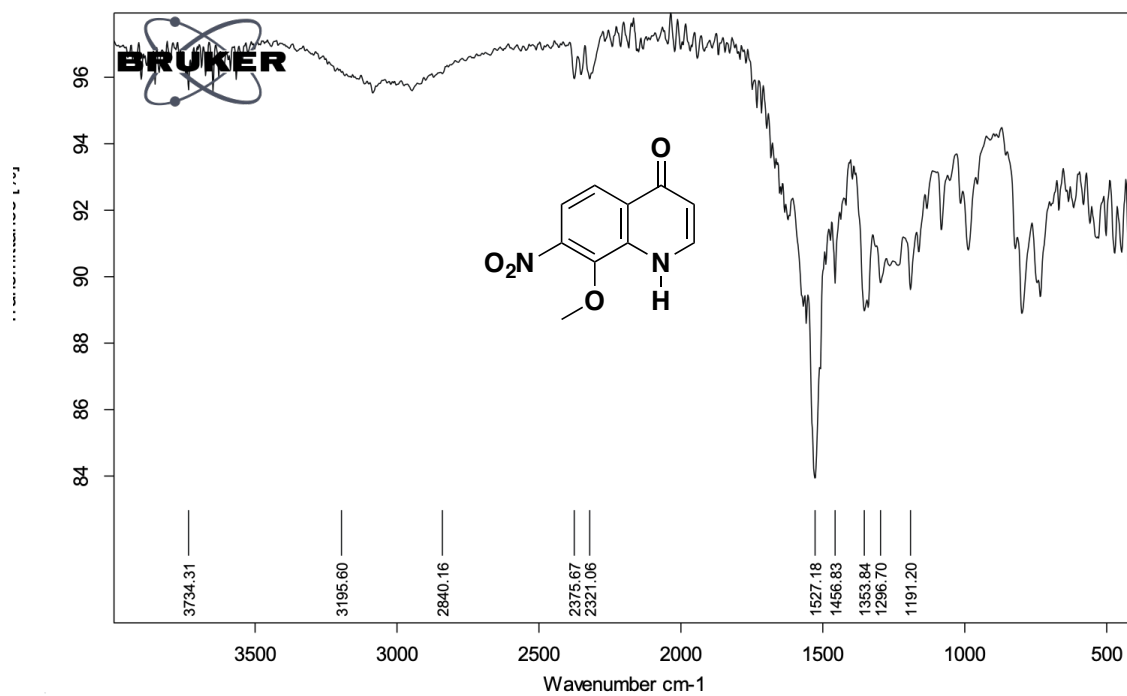

## HPLC trace of final analogs

### 7-Acetamido-4-(2-benzamidophenyl)-8-methoxyquinoline (2)

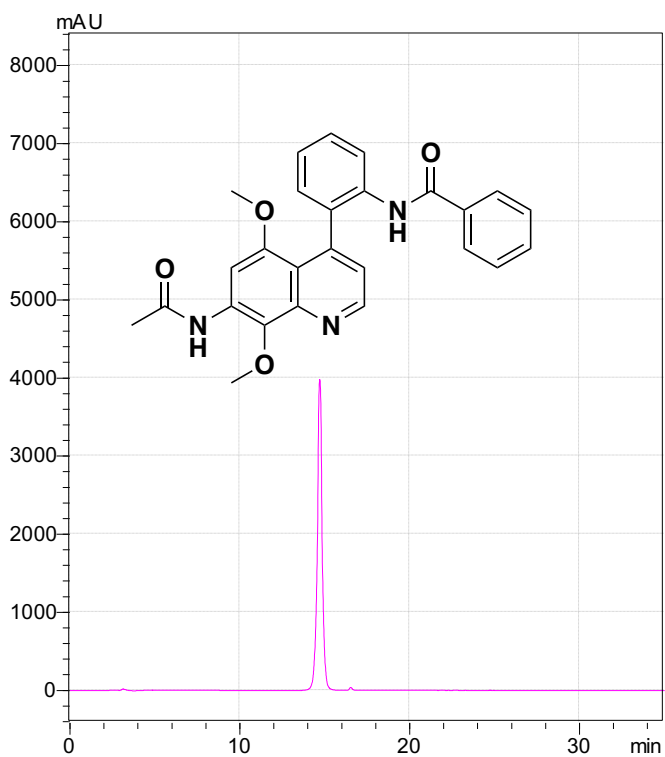

7-Acetamido-4-(2-benzamidophenyl)-8-hydroxyquinoline (3)

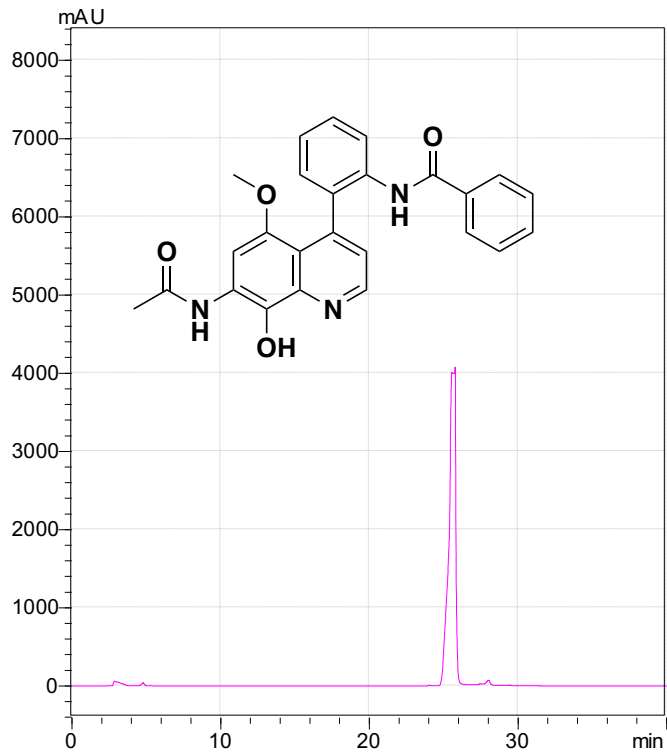



**7-Acetamido-4-(5-fluoro-2-methoxyphenyl)-8-methoxyquinoline (6)**

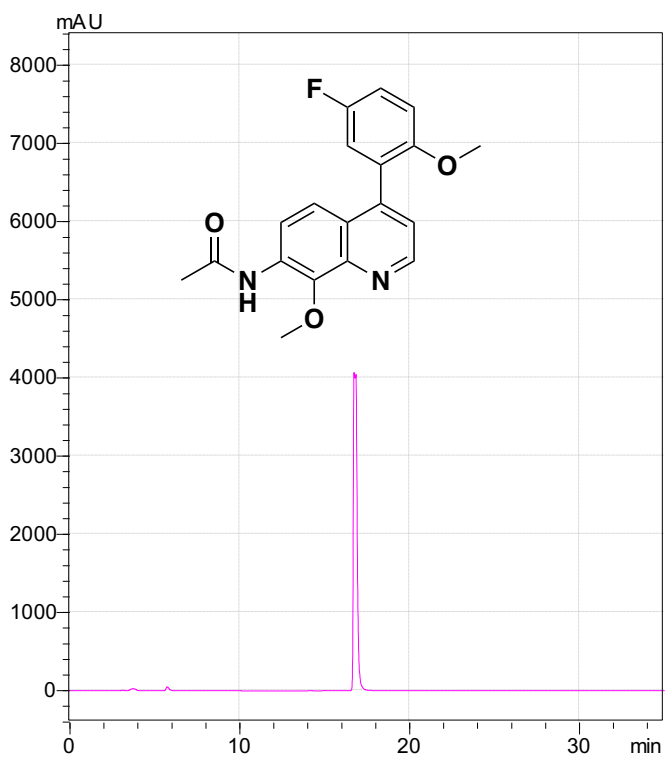

**7-Acetamido-4-(5-fluoro-2-hydroxyphenyl)-8-hydroxyquinoline (7)**

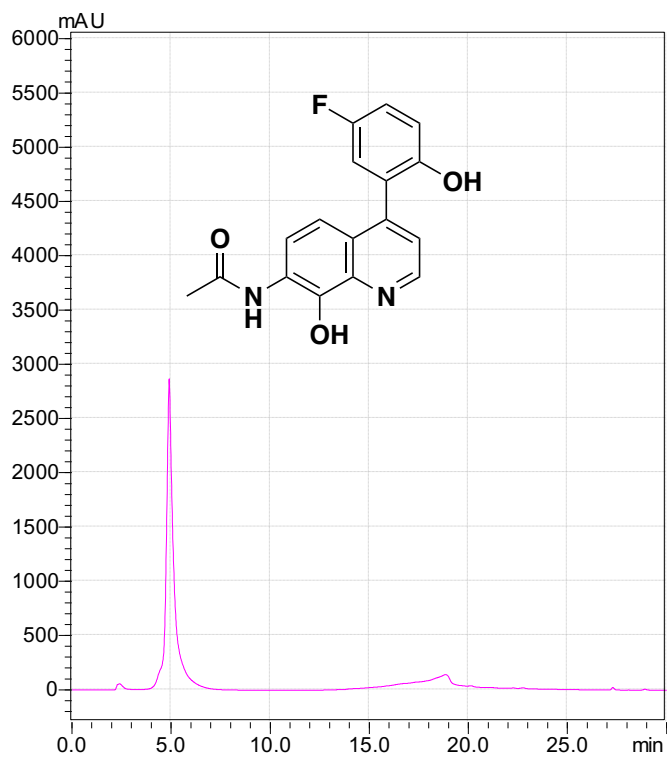

**7-Acetamido-4-(5-fluoro-2-hydroxyphenyl)-8-methoxyquinoline (20)**

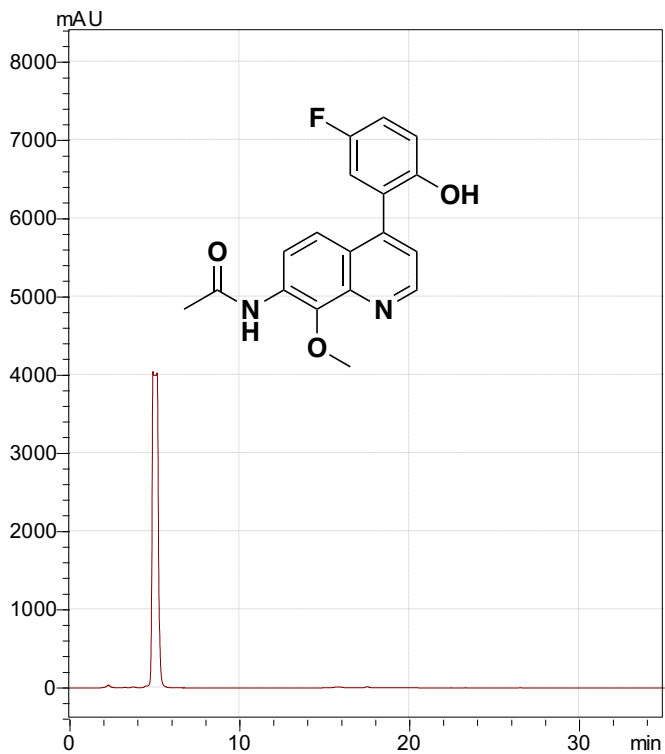

**7-Acetamido-4-(phenyl)-8-hydroxyquinoline (28)**

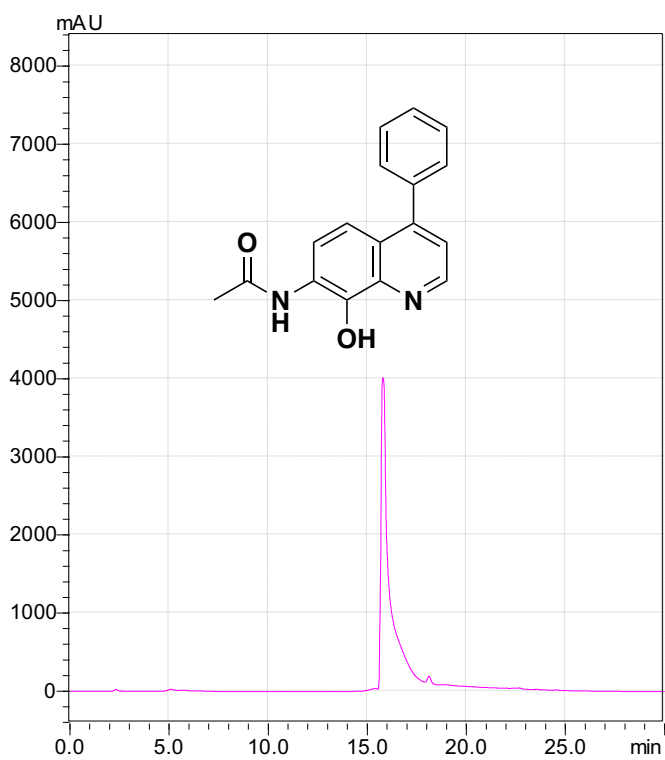

**7-Acetamido-4-(3-fluorophenyl)-8-hydroxyquinoline (29)**

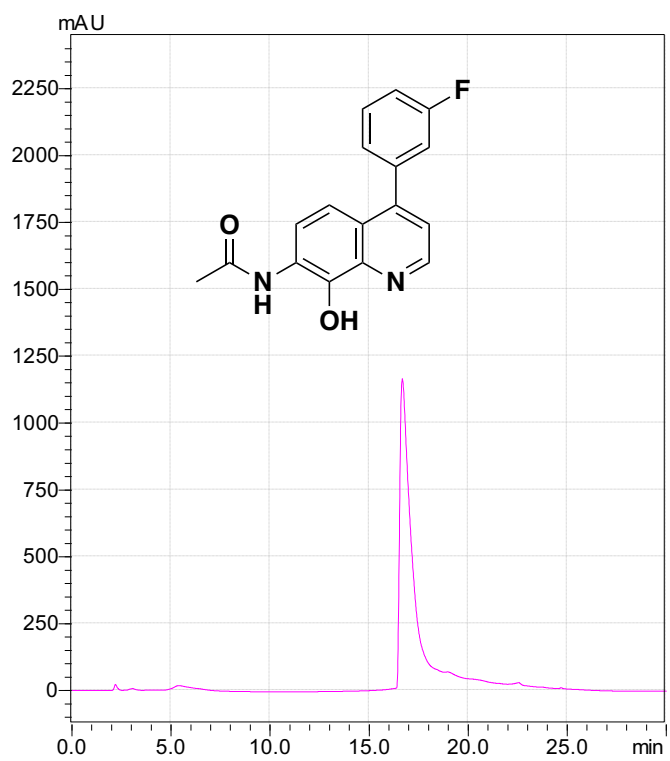

**7-Acetamido-4-(4-fluorophenyl)-8-hydroxyquinoline (30)**

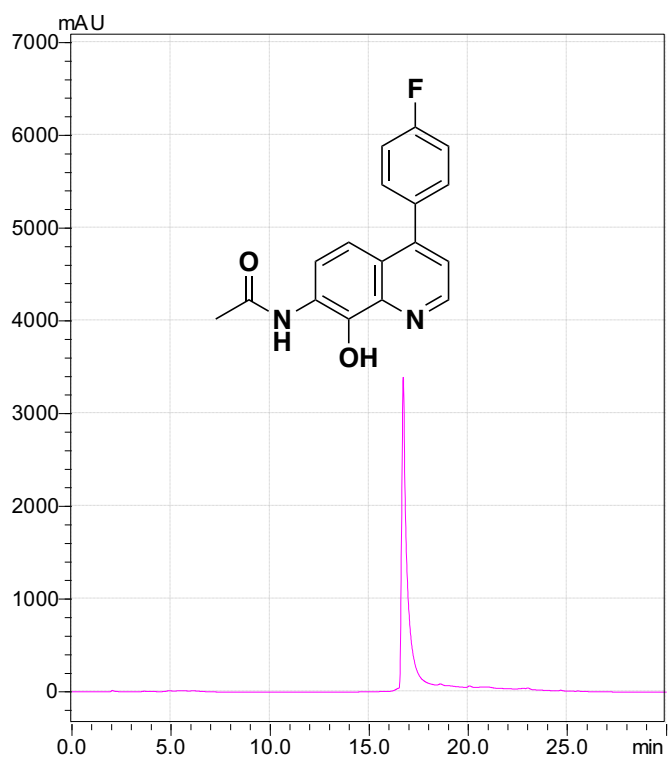

**7-Acetamido-4-((3-trifluoromethyl)phenyl)-8-hydroxyquinoline (31).**

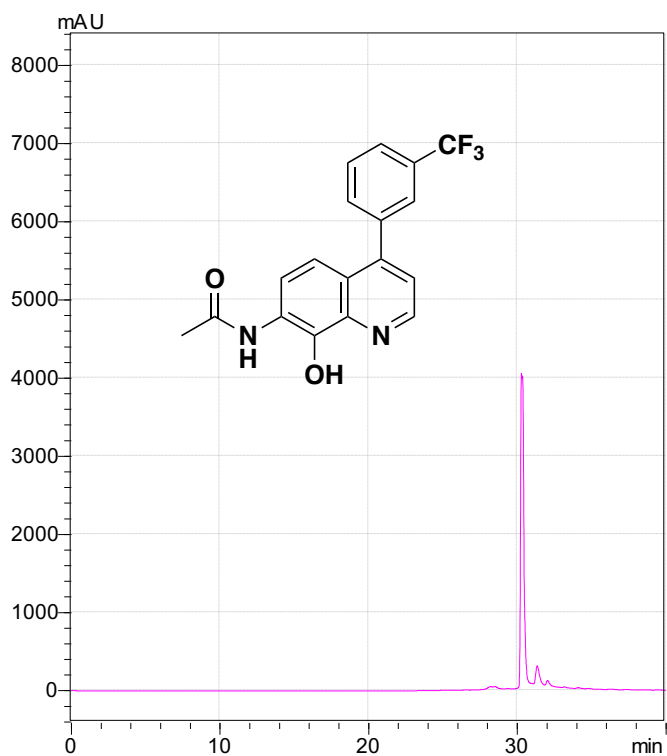

**7-Acetamido-4-((4-trifluoromethyl)phenyl)-8-hydroxyquinoline (32)**

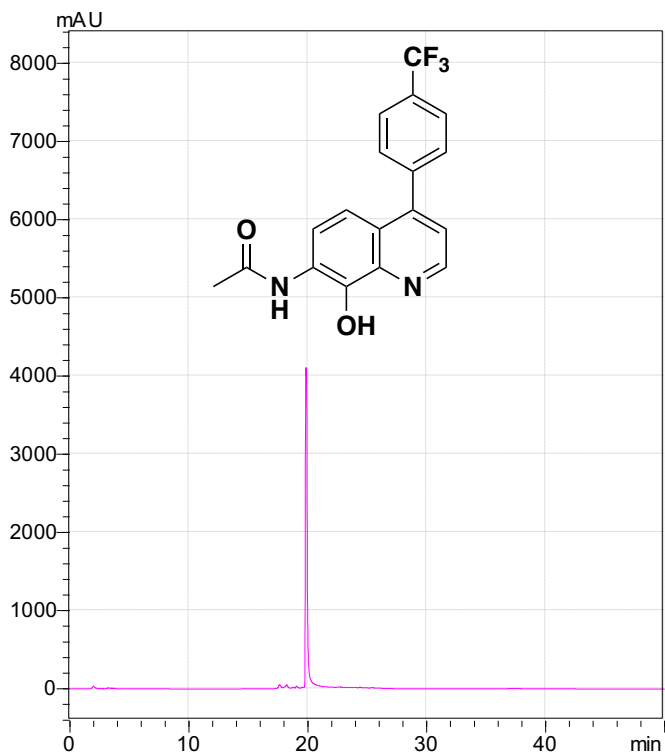



**7-Acetamido-4-(3-hydroxyphenyl)-8-hydroxyquinoline (33).**

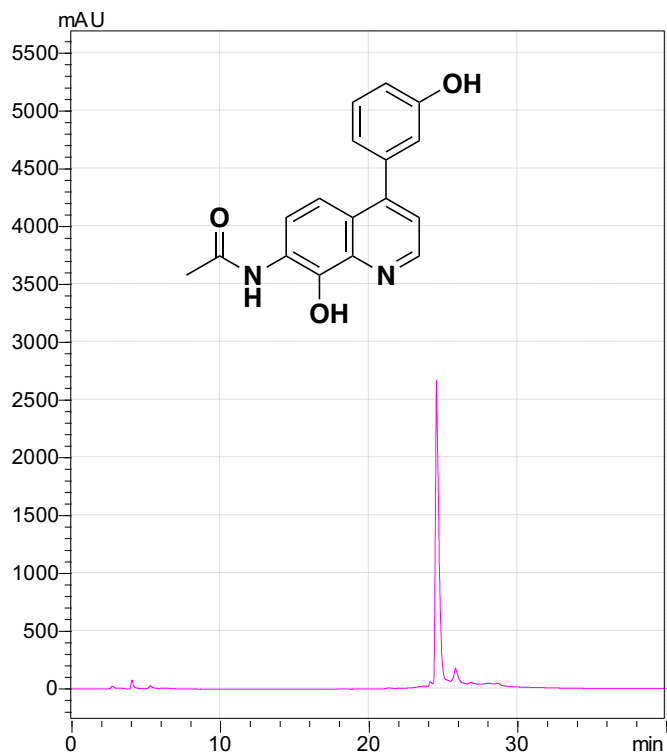

**7-Acetamido-4-(2-acetamidophenyl)-8-hydroxyquinoline (34).**

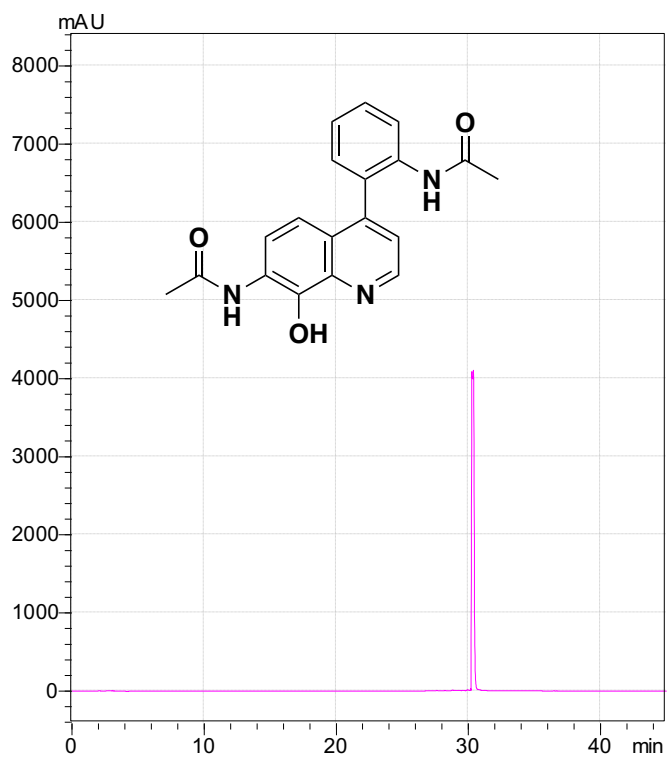

**7-Acetamido-4-(4-acetamidophenyl)-8-hydroxyquinoline (35)**

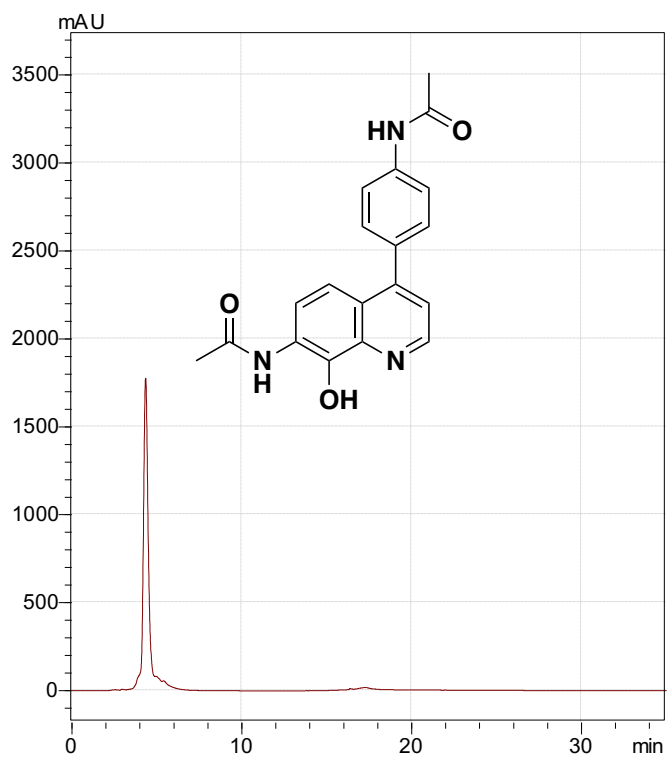

7-Acetamido-4-(3-acetamidophenyl)-8-hydroxyquinoline (36)

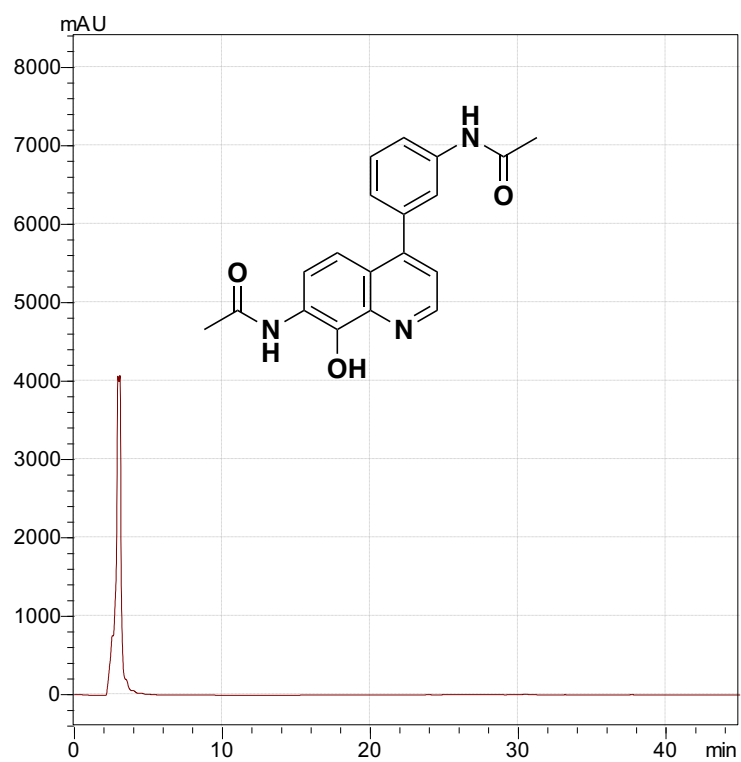

**7-Acetamido-4-(2-hydroxy-(5-trifluoromethyl)phenyl)-8-hydroxyquinoline (37)**

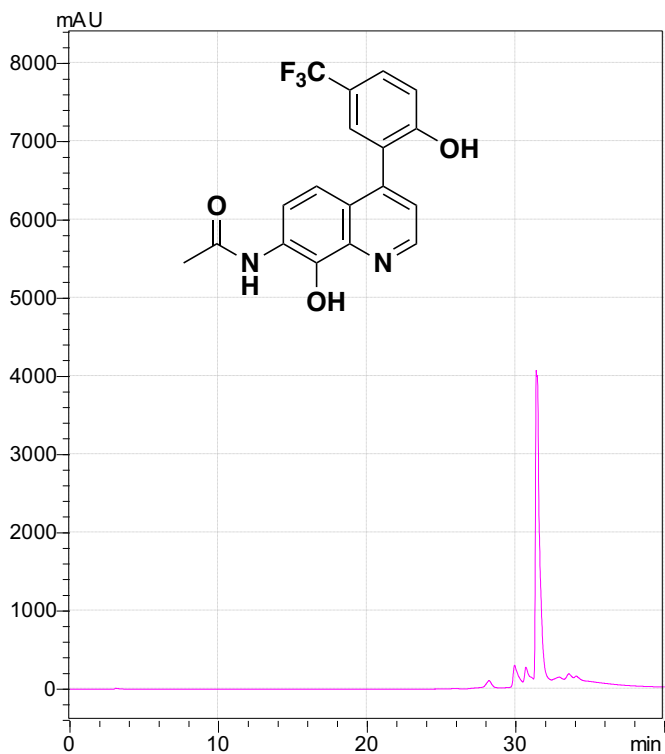

**7-Acetamido-4-(5-chloro-2-hydroxyphenyl)-8-hydroxyquinoline (38)**

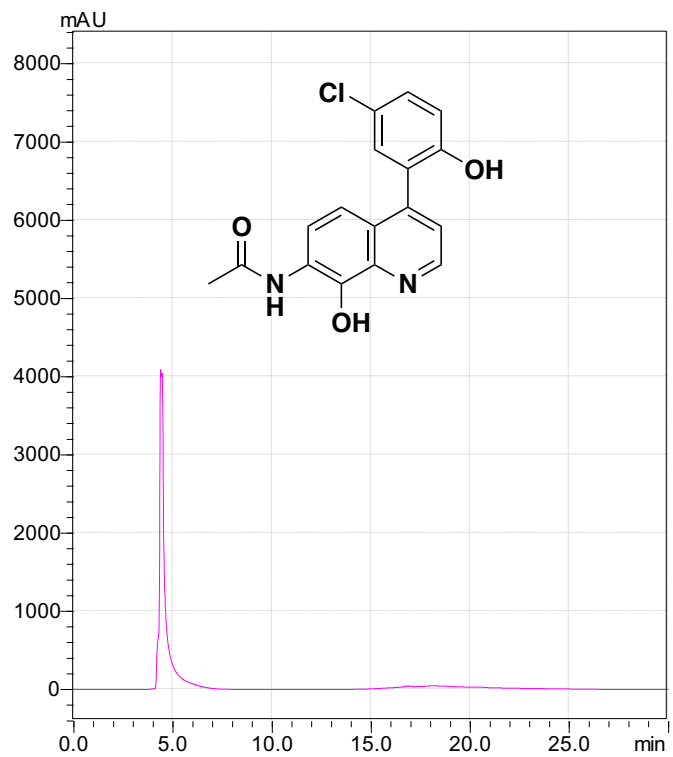

**4-(Phenyl)-8-hydroxy-7-pivalamidoquinoline (39)**

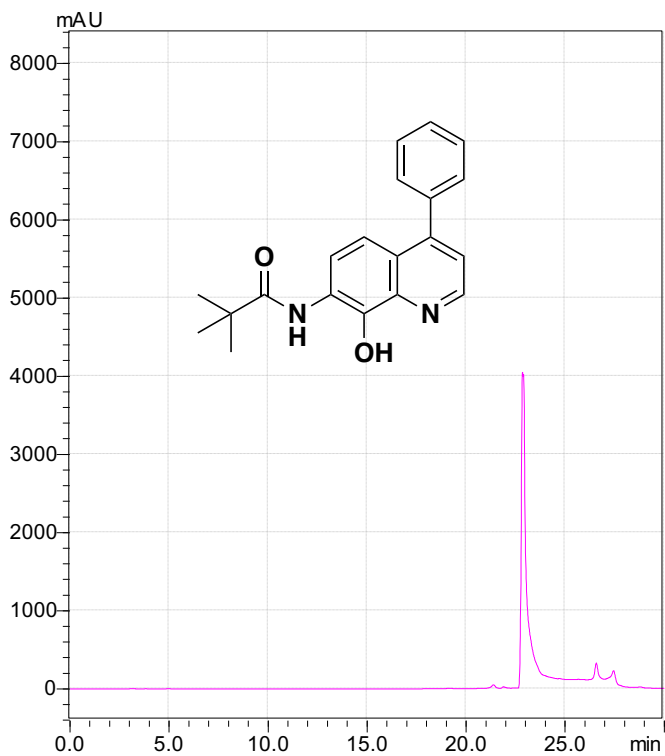

**4-(5-fluoro-2-hydroxyphenyl)-8-hydroxy-7-pivalamido-quinoline (40)**

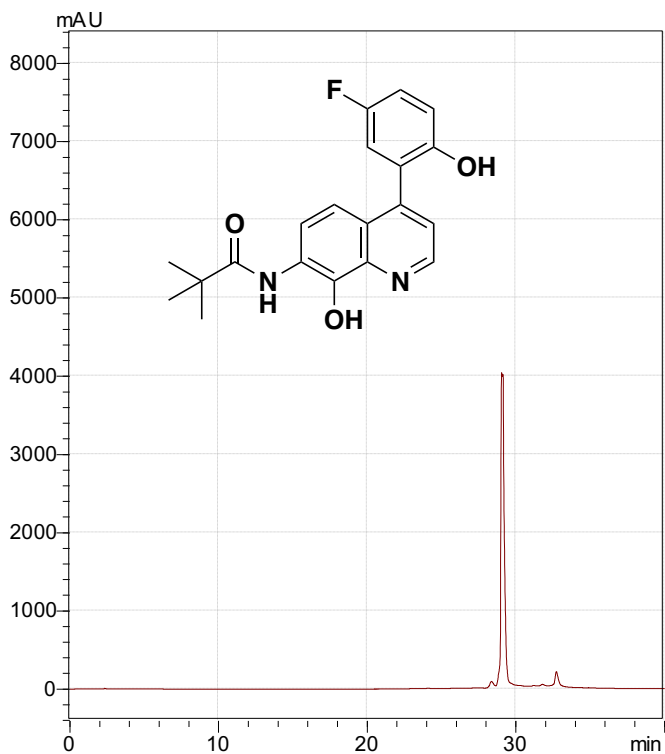



**4-(5-fluoro-2-hydroxyphenyl)-8-hydroxy-7-(2-(morpholin-4-yl)acetamido)quinoline (41).**

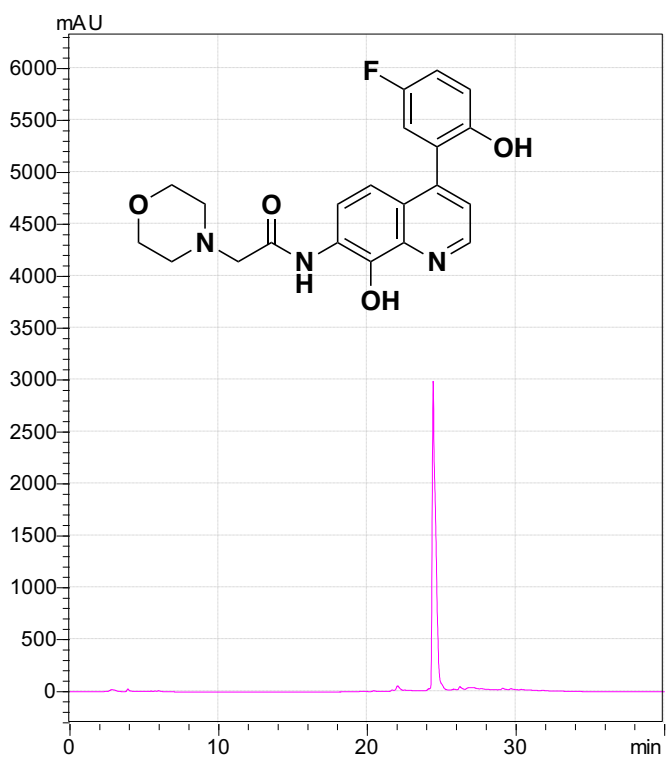

**4-(5-fluoro-2-hydroxyphenyl)-8-hydroxy-7-(2-(morpholin-4-yl)propanamido)quinoline (42).**

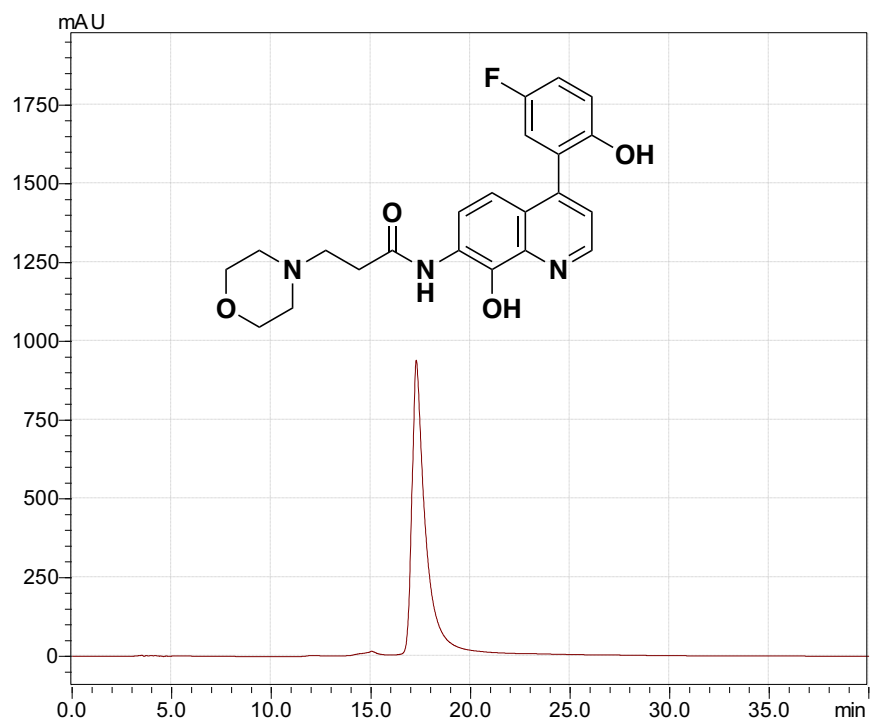

**4-(2-Acetamidophenyl)-8-hydroxy-7-(3-(morpholin-4-yl)propanamido)quinoline (43).**

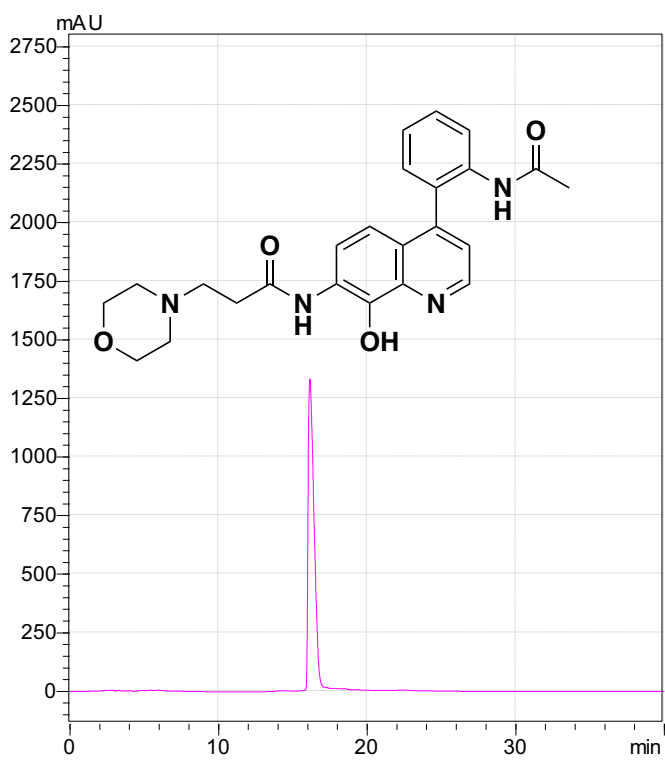

**7-Acetamido-4-(2-benzofuranyl)-8-hydroxyquinoline (53)**

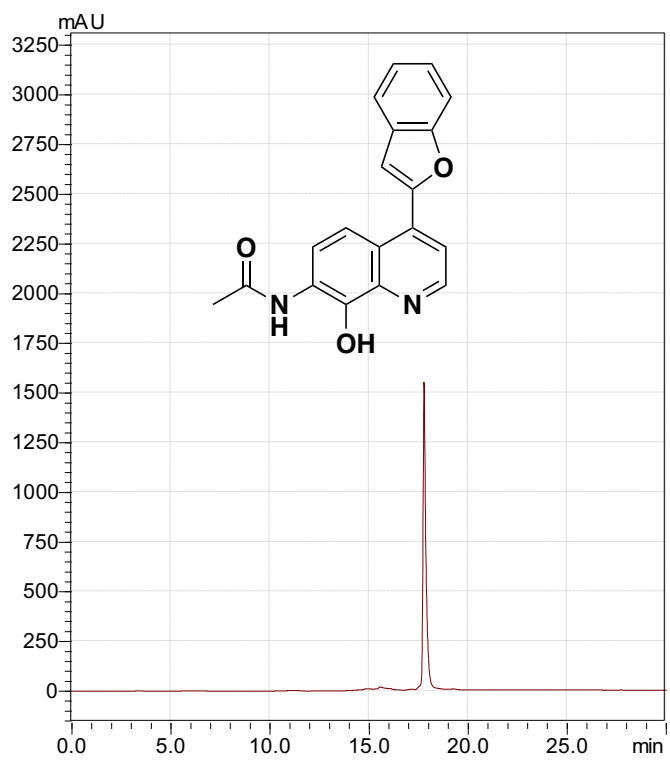

**7-Acetamido-4-(benzo[b]thiophen-2-yl)-8-hydroxyquinoline (54)**

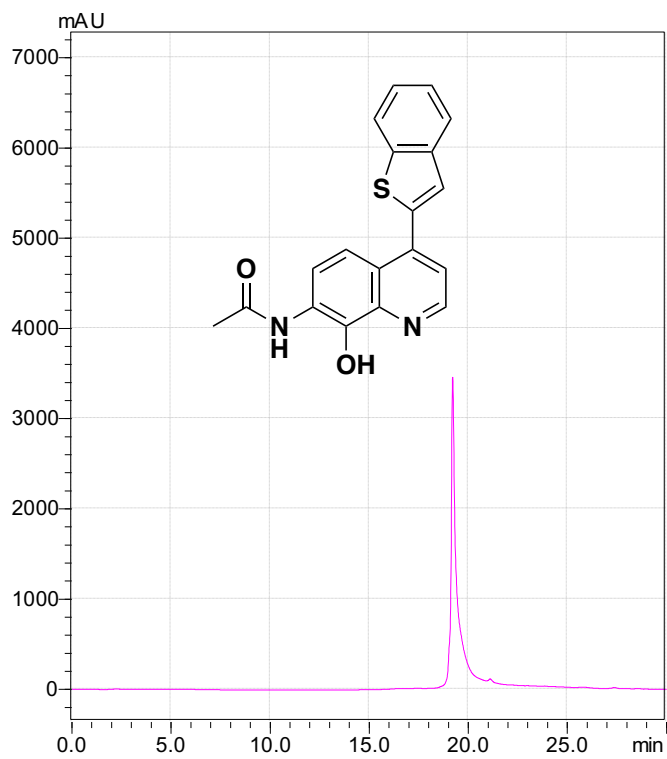

**7-Acetamido-4-(2-furanyl)-8-hydroxyquinoline (55)**

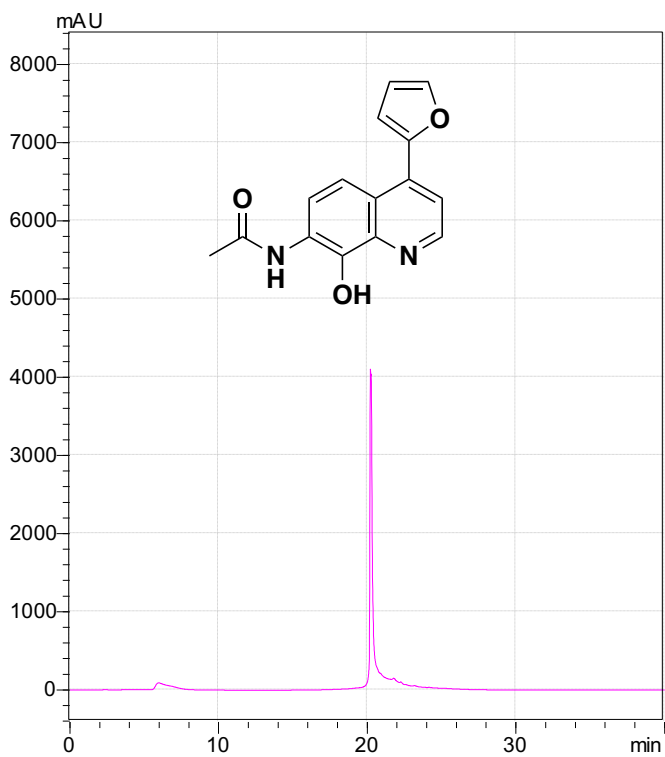

**7-Acetamido-4-(3-furanyl)-8-hydroxyquinoline (56)**

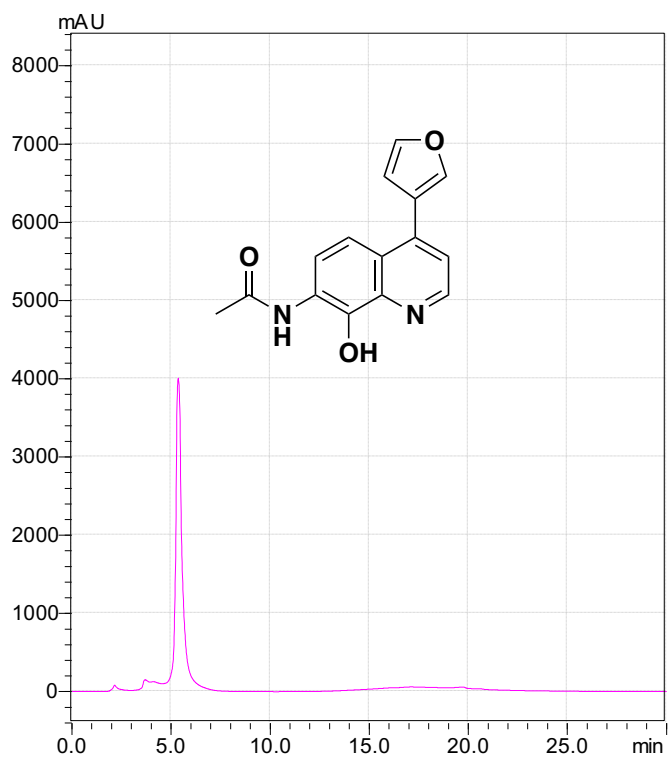

7-Acetamido-4-(thiophen-2-yl)-8-hydroxyquinoline (57)

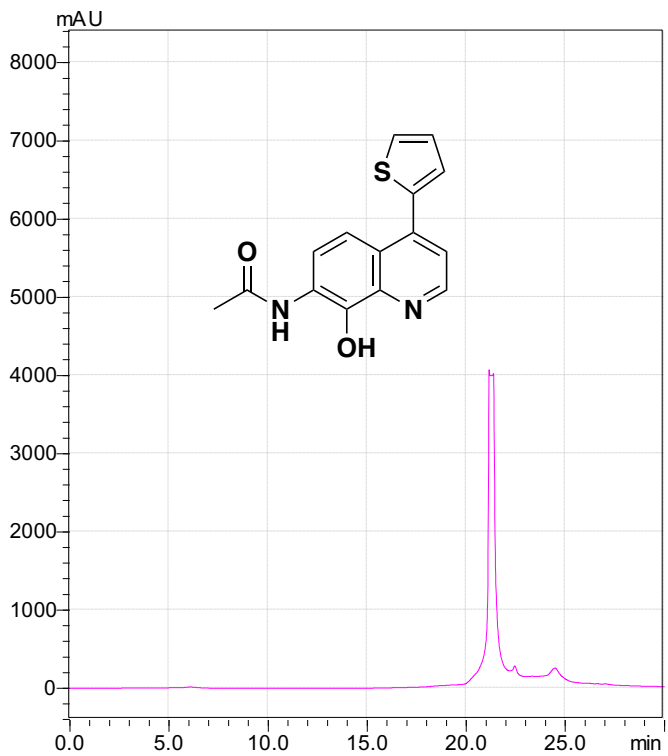



**7-Acetamido-4-(thiophen-3-yl)-8-hydroxyquinoline (58)**

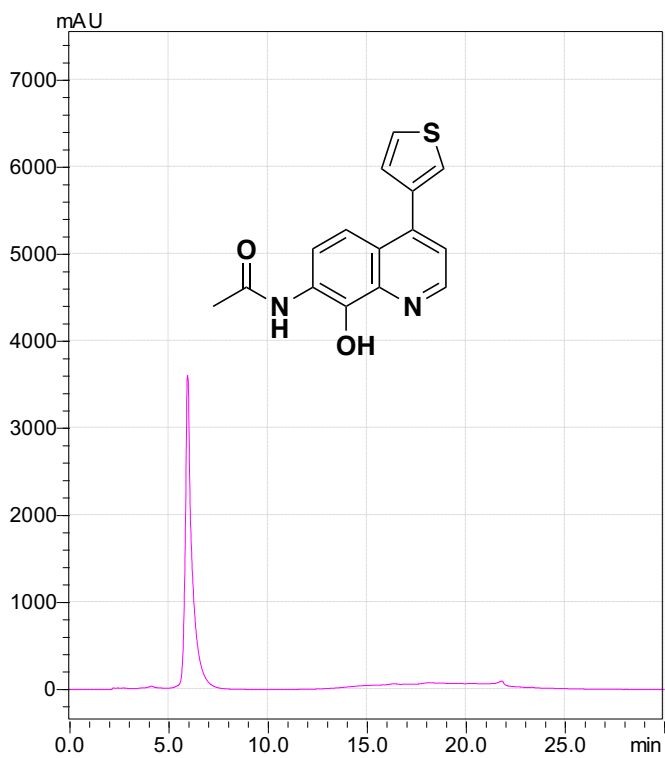

**7-Acetamido-4-(5-pyrimidinyl)-8-hydroxyquinoline (59)**

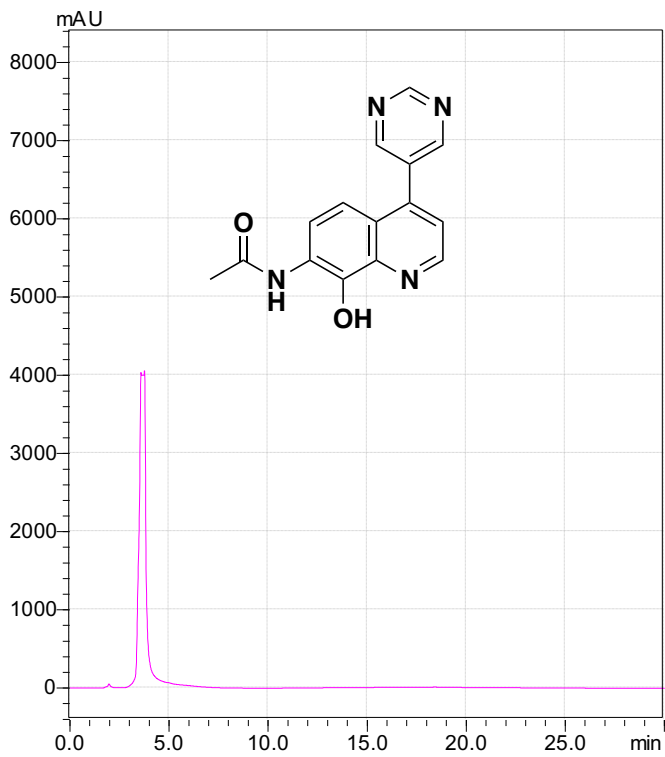

**4-(2-benzofuranyl)-8-hydroxy-7-(2-(morpholin-4-yl)acetamido)quinoline (60)**

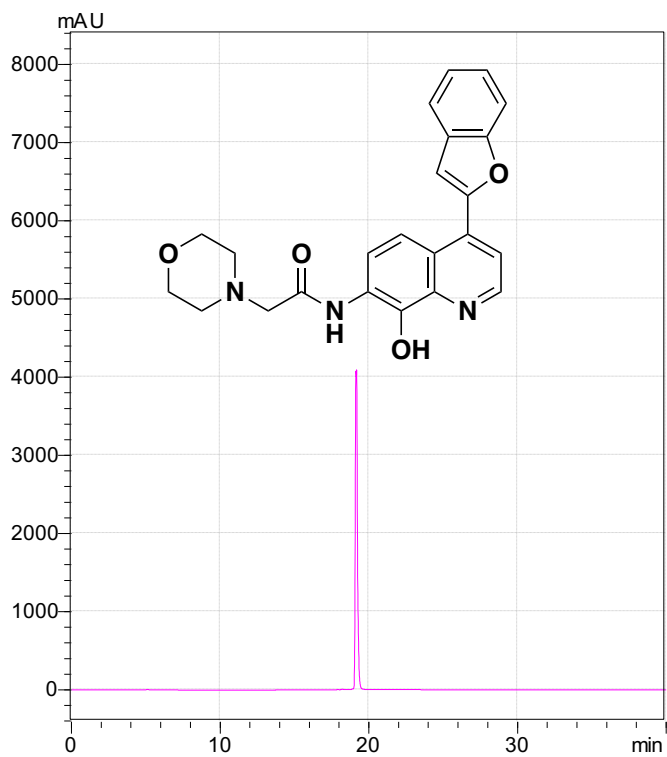

4-(2-benzofuranyl)-8-hydroxy-7-(3-(morpholin-4-yl)propanamido)quinoline (61)

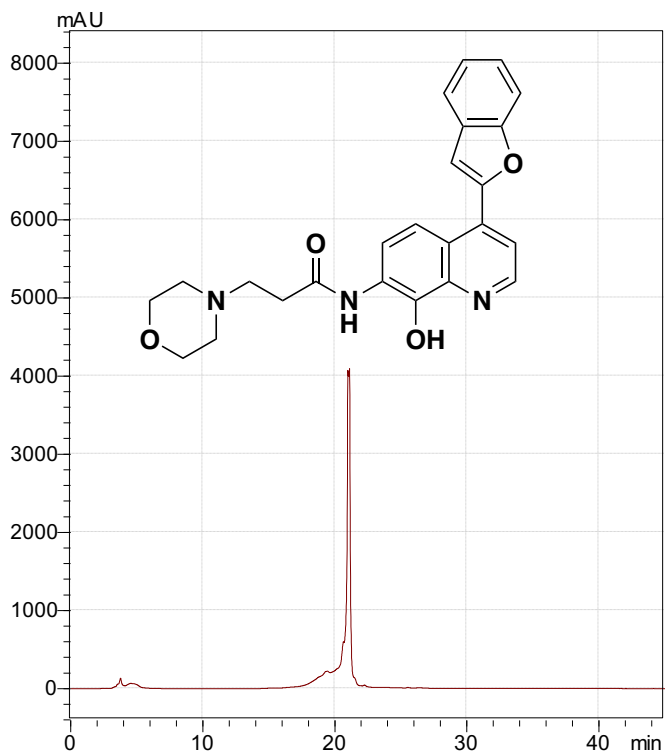

Supplement: NIHMS1646229-supplement-A__Abraham_et_al__Supplementary_Material.pdf [file NIHMS1646229-supplement-A__Abraham_et_al__Supplementary_Material.pdf]
